# Supplementary material for: The Kinetochore Is an Enhancer of Pericentric Cohesin Binding
Source: PLoS Biol. 2004 Jul 27;2(9):e260. doi: 10.1371/journal.pbio.0020260 (PMC490027; doi:10.1371/journal.pbio.0020260)
Supplement: Dataset S8 — Cy3 = genomic DNA; Cy5 = cdc16-ts Mcd1-6HA ChIP in A364a. (4.6 MB XLS). [file pbio.0020260.sd008.xls]

ATF	1.0
27	82    
"Type=GenePix Results 2"
"DateTime=2003/05/01 08:59:58"
"Settings=L:\cohesin3\UP2_178.gps"
"GalFile=L:\arraying&printing\P2uber022803.GAL"
"PixelSize=10"
"Wavelengths=635	532"
"ImageFiles=L:\cohesin3\UP2_178_635.tif 0	L:\cohesin3\UP2_178_532.tif 0"
"NormalizationMethod=None"
"NormalizationFactors=1	1"
"JpegImage="
"RatioFormulations=W1/W2 (635/532)"
"Barcode="
"BackgroundSubtraction=LocalFeature"
"ImageOrigin=1700, 12440"
"JpegOrigin=2100, 13020"
"Creator=GenePix Pro 4.0.1.9"
"Scanner=GenePix 4000B [87097]"
"FocusPosition=0"
"Temperature=29.32"
"LinesAveraged=1"
"Comment=Cy5=mcd1HA cdc16 A364a HA ChIP Cy3=total gDNA"
"PMTGain=600	520"
"ScanPower=100	100"
"LaserPower=3.3	3.85"
"LaserOnTime=20895	20907"
"ScanRegion=170,1244,2075,4900"
"Supplier="
"Block"	"Column"	"Row"	"Name"	"ID"	"X"	"Y"	"Dia."	"F635 Median"	"F635 Mean"	"F635 SD"	"B635 Median"	"B635 Mean"	"B635 SD"	"% > B635+1SD"	"% > B635+2SD"	"F635 % Sat."	"F532 Median"	"F532 Mean"	"F532 SD"	"B532 Median"	"B532 Mean"	"B532 SD"	"% > B532+1SD"	"% > B532+2SD"	"F532 % Sat."	"F3 Median"	"F3 Mean"	"F3 SD"	"B3 Median"	"B3 Mean"	"B3 SD"	"% > B3+1SD"	"% > B3+2SD"	"F3 % Sat."	"F4 Median"	"F4 Mean"	"F4 SD"	"B4 Median"	"B4 Mean"	"B4 SD"	"% > B4+1SD"	"% > B4+2SD"	"F4 % Sat."	"Ratio of Medians (635/532)"	"Ratio of Means (635/532)"	"Median of Ratios (635/532)"	"Mean of Ratios (635/532)"	"Ratios SD (635/532)"	"Rgn Ratio (635/532)"	"Rgn R� (635/532)"	"Ratio of Medians (Ratio/2)"	"Ratio of Means (Ratio/2)"	"Median of Ratios (Ratio/2)"	"Mean of Ratios (Ratio/2)"	"Ratios SD (Ratio/2)"	"Rgn Ratio (Ratio/2)"	"Rgn R� (Ratio/2)"	"Ratio of Medians (Ratio/3)"	"Ratio of Means (Ratio/3)"	"Median of Ratios (Ratio/3)"	"Mean of Ratios (Ratio/3)"	"Ratios SD (Ratio/3)"	"Rgn Ratio (Ratio/3)"	"Rgn R� (Ratio/3)"	"F Pixels"	"B Pixels"	"Sum of Medians"	"Sum of Means"	"Log Ratio (635/532)"	"Log Ratio (Ratio/2)"	"Log Ratio (Ratio/3)"	"F635 Median - B635"	"F532 Median - B532"	"F3 Median - B3"	"F4 Median - B4"	"F635 Mean - B635"	"F532 Mean - B532"	"F3 Mean - B3"	"F4 Mean - B4"	"Flags"	"Normalize"
1	1	1	"cdc27"	"YBL084C"	2460	13350	130	1743	1545	1159	80	85	43	94	90	0	1506	1741	3343	80	82	24	87	84	0	0	0	0	0	0	0	0	0	0	0	0	0	0	0	0	0	0	0	1.166	0.882	1.168	1.248	2.454	0.256	0.200	0.000	0.000	0.000	0.000	0.000	0.000	0.000	0.000	0.000	0.000	0.000	0.000	0.000	0.000	120	717	3089	3126	0.222	Error	Error	1663	1426	0	0	1465	1661	0	0	0	0
1	2	1	""	"YBL113C"	2620	13360	120	34807	30267	14778	88	91	38	100	100	0	23269	20552	10346	86	90	28	100	99	0	0	0	0	0	0	0	0	0	0	0	0	0	0	0	0	0	0	0	1.498	1.475	1.526	1.674	1.936	1.466	0.896	0.000	0.000	0.000	0.000	0.000	0.000	0.000	0.000	0.000	0.000	0.000	0.000	0.000	0.000	120	534	57902	50645	0.583	Error	Error	34719	23183	0	0	30179	20466	0	0	0	0
1	3	1	""	"YBR030W"	2800	13360	120	1598	1445	661	88	95	44	98	96	0	3740	3423	1821	91	95	33	96	96	0	0	0	0	0	0	0	0	0	0	0	0	0	0	0	0	0	0	0	0.414	0.407	0.419	0.443	1.825	0.369	0.842	0.000	0.000	0.000	0.000	0.000	0.000	0.000	0.000	0.000	0.000	0.000	0.000	0.000	0.000	120	536	5159	4689	-1.273	Error	Error	1510	3649	0	0	1357	3332	0	0	0	0
1	4	1	""	"YBL086C"	2980	13360	120	846	818	444	88	93	41	95	93	0	2610	2471	1699	94	101	43	89	86	0	0	0	0	0	0	0	0	0	0	0	0	0	0	0	0	0	0	0	0.301	0.307	0.300	0.399	2.730	0.262	0.800	0.000	0.000	0.000	0.000	0.000	0.000	0.000	0.000	0.000	0.000	0.000	0.000	0.000	0.000	120	510	3274	3107	-1.731	Error	Error	758	2516	0	0	730	2377	0	0	0	0
1	5	1	"RER2"	"YBR002C"	3160	13350	120	5394	4877	2722	93	107	119	95	91	0	3454	3140	1744	93	117	188	86	86	0	0	0	0	0	0	0	0	0	0	0	0	0	0	0	0	0	0	0	1.577	1.570	1.533	1.621	1.746	1.595	0.824	0.000	0.000	0.000	0.000	0.000	0.000	0.000	0.000	0.000	0.000	0.000	0.000	0.000	0.000	120	511	8662	7831	0.657	Error	Error	5301	3361	0	0	4784	3047	0	0	0	0
1	6	1	""	"YBR032W"	3340	13370	150	106	118	56	94	166	545	0	0	0	103	112	43	96	168	499	0	0	0	0	0	0	0	0	0	0	0	0	0	0	0	0	0	0	0	0	0	1.714	1.500	1.141	1.253	3.560	0.345	0.565	0.000	0.000	0.000	0.000	0.000	0.000	0.000	0.000	0.000	0.000	0.000	0.000	0.000	0.000	156	895	19	40	0.778	Error	Error	12	7	0	0	24	16	0	0	-50	0
1	7	1	"tel1"	"YBL088C"	3570	13350	120	229	238	97	87	98	114	63	19	0	221	221	95	95	106	101	62	16	0	0	0	0	0	0	0	0	0	0	0	0	0	0	0	0	0	0	0	1.127	1.198	1.092	1.173	2.334	1.437	0.677	0.000	0.000	0.000	0.000	0.000	0.000	0.000	0.000	0.000	0.000	0.000	0.000	0.000	0.000	120	592	268	277	0.172	Error	Error	142	126	0	0	151	126	0	0	0	0
1	8	1	""	"YBR004C"	3720	13350	130	7849	6574	3475	85	92	53	97	96	0	2715	2203	1392	93	98	35	90	85	0	0	0	0	0	0	0	0	0	0	0	0	0	0	0	0	0	0	0	2.961	3.075	2.971	3.528	2.358	3.020	0.854	0.000	0.000	0.000	0.000	0.000	0.000	0.000	0.000	0.000	0.000	0.000	0.000	0.000	0.000	120	609	10386	8599	1.566	Error	Error	7764	2622	0	0	6489	2110	0	0	0	0
1	9	1	"HMT1"	"YBR034C"	3910	13350	120	2678	2612	1465	88	94	42	97	96	0	4043	3793	2212	97	103	35	95	91	0	0	0	0	0	0	0	0	0	0	0	0	0	0	0	0	0	0	0	0.656	0.683	0.675	0.800	2.451	0.652	0.866	0.000	0.000	0.000	0.000	0.000	0.000	0.000	0.000	0.000	0.000	0.000	0.000	0.000	0.000	120	565	6536	6220	-0.607	Error	Error	2590	3946	0	0	2524	3696	0	0	0	0
1	10	1	"MRP21"	"YBL090W"	4090	13360	120	6335	5040	2539	90	96	42	97	95	0	5580	4384	2564	101	143	851	80	75	0	0	0	0	0	0	0	0	0	0	0	0	0	0	0	0	0	0	0	1.140	1.156	1.130	1.465	2.689	1.027	0.766	0.000	0.000	0.000	0.000	0.000	0.000	0.000	0.000	0.000	0.000	0.000	0.000	0.000	0.000	120	534	11724	9233	0.189	Error	Error	6245	5479	0	0	4950	4283	0	0	0	0
1	11	1	""	"YBR006W"	4260	13360	130	12510	11112	7359	92	98	41	100	97	0	3529	3008	2177	97	128	754	71	66	0	0	0	0	0	0	0	0	0	0	0	0	0	0	0	0	0	0	0	3.618	3.786	3.547	4.376	2.197	3.856	0.686	0.000	0.000	0.000	0.000	0.000	0.000	0.000	0.000	0.000	0.000	0.000	0.000	0.000	0.000	120	680	15850	13931	1.855	Error	Error	12418	3432	0	0	11020	2911	0	0	0	0
1	12	1	"CSG2"	"YBR036C"	4490	13380	120	4437	4154	2016	90	100	103	98	95	0	5528	5139	2622	94	98	37	97	95	0	0	0	0	0	0	0	0	0	0	0	0	0	0	0	0	0	0	0	0.800	0.806	0.823	0.869	1.731	0.781	0.891	0.000	0.000	0.000	0.000	0.000	0.000	0.000	0.000	0.000	0.000	0.000	0.000	0.000	0.000	120	640	9781	9109	-0.322	Error	Error	4347	5434	0	0	4064	5045	0	0	0	0
1	13	1	""	"YCL048W"	4690	13370	120	9987	9153	4165	93	122	328	98	94	0	6093	5322	2794	93	105	182	94	89	0	0	0	0	0	0	0	0	0	0	0	0	0	0	0	0	0	0	0	1.649	1.733	1.759	1.857	1.621	1.718	0.888	0.000	0.000	0.000	0.000	0.000	0.000	0.000	0.000	0.000	0.000	0.000	0.000	0.000	0.000	120	561	15894	14289	0.722	Error	Error	9894	6000	0	0	9060	5229	0	0	0	0
1	14	1	""	"YCR010C"	4860	13370	120	13249	11424	5959	99	133	338	95	93	0	4973	4312	2509	94	103	74	92	88	0	0	0	0	0	0	0	0	0	0	0	0	0	0	0	0	0	0	0	2.695	2.685	2.696	2.942	1.879	2.705	0.882	0.000	0.000	0.000	0.000	0.000	0.000	0.000	0.000	0.000	0.000	0.000	0.000	0.000	0.000	120	544	18029	15543	1.430	Error	Error	13150	4879	0	0	11325	4218	0	0	0	0
1	15	1	"bud5"	"YCR038C"	5050	13380	130	5221	5122	3102	108	183	724	86	85	0	6537	6369	4313	102	171	554	88	83	0	0	0	0	0	0	0	0	0	0	0	0	0	0	0	0	0	0	0	0.795	0.800	0.809	0.909	2.229	0.767	0.882	0.000	0.000	0.000	0.000	0.000	0.000	0.000	0.000	0.000	0.000	0.000	0.000	0.000	0.000	120	603	11548	11281	-0.332	Error	Error	5113	6435	0	0	5014	6267	0	0	0	0
1	16	1	"apa1"	"YCL050C"	5220	13380	130	11641	9955	5014	114	131	76	97	96	0	4376	3661	2059	105	125	76	90	89	0	0	0	0	0	0	0	0	0	0	0	0	0	0	0	0	0	0	0	2.699	2.767	2.769	3.044	2.064	2.728	0.879	0.000	0.000	0.000	0.000	0.000	0.000	0.000	0.000	0.000	0.000	0.000	0.000	0.000	0.000	120	606	15798	13397	1.432	Error	Error	11527	4271	0	0	9841	3556	0	0	0	0
1	17	1	"PGK1"	"YCR012W"	5420	13380	120	4221	3648	1878	111	123	68	97	95	0	2457	2109	1207	104	117	78	88	85	0	0	0	0	0	0	0	0	0	0	0	0	0	0	0	0	0	0	0	1.747	1.764	1.817	2.007	2.135	1.771	0.859	0.000	0.000	0.000	0.000	0.000	0.000	0.000	0.000	0.000	0.000	0.000	0.000	0.000	0.000	120	524	6463	5542	0.805	Error	Error	4110	2353	0	0	3537	2005	0	0	0	0
1	18	1	"MATalpha1"	"YCR040W"	5580	13380	120	7849	6640	2763	123	207	346	95	93	0	5611	4670	2225	116	222	532	90	85	0	0	0	0	0	0	0	0	0	0	0	0	0	0	0	0	0	0	0	1.406	1.431	1.392	1.598	1.908	1.389	0.913	0.000	0.000	0.000	0.000	0.000	0.000	0.000	0.000	0.000	0.000	0.000	0.000	0.000	0.000	120	527	13221	11071	0.492	Error	Error	7726	5495	0	0	6517	4554	0	0	0	0
1	19	1	"PBN1"	"YCL052C"	5780	13380	120	10161	9350	4796	120	186	321	95	94	0	3088	2809	1664	112	201	499	83	80	0	0	0	0	0	0	0	0	0	0	0	0	0	0	0	0	0	0	0	3.374	3.422	3.354	3.646	1.817	3.437	0.816	0.000	0.000	0.000	0.000	0.000	0.000	0.000	0.000	0.000	0.000	0.000	0.000	0.000	0.000	120	592	13017	11927	1.754	Error	Error	10041	2976	0	0	9230	2697	0	0	0	0
1	20	1	"POL4"	"YCR014C"	5980	13380	120	7245	7037	3493	105	116	63	97	96	0	3059	2860	1620	102	116	107	90	88	0	0	0	0	0	0	0	0	0	0	0	0	0	0	0	0	0	0	0	2.415	2.513	2.384	2.501	1.681	2.514	0.809	0.000	0.000	0.000	0.000	0.000	0.000	0.000	0.000	0.000	0.000	0.000	0.000	0.000	0.000	120	578	10097	9690	1.272	Error	Error	7140	2957	0	0	6932	2758	0	0	0	0
1	21	1	"TSM1"	"YCR042C"	6170	13380	130	958	947	534	108	166	401	78	54	0	1126	1206	830	108	286	1211	37	5	0	0	0	0	0	0	0	0	0	0	0	0	0	0	0	0	0	0	0	0.835	0.764	0.777	0.781	1.571	0.654	0.767	0.000	0.000	0.000	0.000	0.000	0.000	0.000	0.000	0.000	0.000	0.000	0.000	0.000	0.000	120	599	1868	1937	-0.260	Error	Error	850	1018	0	0	839	1098	0	0	0	0
1	22	1	"KAR4"	"YCL055W"	6340	13380	120	2303	2112	1018	107	118	86	95	93	0	3293	2987	1633	106	126	161	89	86	0	0	0	0	0	0	0	0	0	0	0	0	0	0	0	0	0	0	0	0.689	0.696	0.710	0.766	2.250	0.646	0.833	0.000	0.000	0.000	0.000	0.000	0.000	0.000	0.000	0.000	0.000	0.000	0.000	0.000	0.000	120	612	5383	4886	-0.537	Error	Error	2196	3187	0	0	2005	2881	0	0	0	0
1	1	2	""	"YCR016W"	2370	13570	120	7990	7116	3636	77	84	36	99	99	0	3751	3308	1766	79	83	24	92	91	0	0	0	0	0	0	0	0	0	0	0	0	0	0	0	0	0	0	0	2.155	2.180	2.197	2.300	1.826	2.207	0.868	0.000	0.000	0.000	0.000	0.000	0.000	0.000	0.000	0.000	0.000	0.000	0.000	0.000	0.000	120	533	11585	10268	1.108	Error	Error	7913	3672	0	0	7039	3229	0	0	0	0
1	2	2	""	"YCR044C"	2540	13580	120	1865	1639	858	87	94	46	95	92	0	5248	4388	2683	88	125	350	85	80	0	0	0	0	0	0	0	0	0	0	0	0	0	0	0	0	0	0	0	0.345	0.361	0.349	0.412	2.412	0.315	0.875	0.000	0.000	0.000	0.000	0.000	0.000	0.000	0.000	0.000	0.000	0.000	0.000	0.000	0.000	120	460	6938	5852	-1.537	Error	Error	1778	5160	0	0	1552	4300	0	0	0	0
1	3	2	"rad57"	"YDR004W"	2730	13570	120	12913	10981	5202	96	119	130	95	95	0	3500	3118	1487	97	149	361	87	85	0	0	0	0	0	0	0	0	0	0	0	0	0	0	0	0	0	0	0	3.766	3.603	3.728	3.789	1.815	3.750	0.863	0.000	0.000	0.000	0.000	0.000	0.000	0.000	0.000	0.000	0.000	0.000	0.000	0.000	0.000	120	498	16220	13906	1.913	Error	Error	12817	3403	0	0	10885	3021	0	0	0	0
1	4	2	""	"YDR034C-C"	2920	13560	150	37623	28406	19882	107	128	126	89	87	0	46329	35231	25570	108	135	138	86	83	3	0	0	0	0	0	0	0	0	0	0	0	0	0	0	0	0	0	0	0.812	0.806	0.799	0.951	2.380	0.777	0.921	0.000	0.000	0.000	0.000	0.000	0.000	0.000	0.000	0.000	0.000	0.000	0.000	0.000	0.000	156	559	83737	63422	-0.301	Error	Error	37516	46221	0	0	28299	35123	0	0	0	0
1	5	2	"RPS13"	"YDR064W"	3110	13560	150	1825	1624	1219	104	115	106	78	73	0	3385	3024	2352	107	124	137	73	71	0	0	0	0	0	0	0	0	0	0	0	0	0	0	0	0	0	0	0	0.525	0.521	0.523	0.597	2.729	0.503	0.877	0.000	0.000	0.000	0.000	0.000	0.000	0.000	0.000	0.000	0.000	0.000	0.000	0.000	0.000	156	639	4999	4437	-0.930	Error	Error	1721	3278	0	0	1520	2917	0	0	0	0
1	6	2	"SOK1"	"YDR006C"	3300	13570	110	3467	3756	2917	102	323	1016	85	76	0	2450	2591	1998	105	281	795	82	68	0	0	0	0	0	0	0	0	0	0	0	0	0	0	0	0	0	0	0	1.435	1.470	1.426	1.636	1.912	1.509	0.824	0.000	0.000	0.000	0.000	0.000	0.000	0.000	0.000	0.000	0.000	0.000	0.000	0.000	0.000	80	410	5710	6140	0.521	Error	Error	3365	2345	0	0	3654	2486	0	0	0	0
1	7	2	""	"YDR034W-B"	3490	13570	110	748	696	374	108	315	932	15	0	0	1451	1252	743	111	308	765	70	33	0	0	0	0	0	0	0	0	0	0	0	0	0	0	0	0	0	0	0	0.478	0.515	0.545	0.623	2.280	0.701	0.797	0.000	0.000	0.000	0.000	0.000	0.000	0.000	0.000	0.000	0.000	0.000	0.000	0.000	0.000	80	503	1980	1729	-1.066	Error	Error	640	1340	0	0	588	1141	0	0	0	0
1	8	2	""	"YDR066C"	3700	13570	120	11662	10354	4818	97	129	141	100	98	0	5824	5027	2480	104	160	244	94	90	0	0	0	0	0	0	0	0	0	0	0	0	0	0	0	0	0	0	0	2.022	2.083	2.017	2.282	2.017	2.132	0.884	0.000	0.000	0.000	0.000	0.000	0.000	0.000	0.000	0.000	0.000	0.000	0.000	0.000	0.000	120	577	17285	15180	1.016	Error	Error	11565	5720	0	0	10257	4923	0	0	0	0
1	9	2	""	"YDR008C"	3890	13570	120	3009	2564	1070	95	103	52	97	97	0	4193	3523	1574	103	109	36	96	94	0	0	0	0	0	0	0	0	0	0	0	0	0	0	0	0	0	0	0	0.712	0.722	0.725	0.800	2.327	0.698	0.892	0.000	0.000	0.000	0.000	0.000	0.000	0.000	0.000	0.000	0.000	0.000	0.000	0.000	0.000	120	480	7004	5889	-0.489	Error	Error	2914	4090	0	0	2469	3420	0	0	0	0
1	10	2	""	"YDR036C"	4060	13570	120	11191	9956	5024	104	111	53	99	98	0	8652	7388	4100	109	112	34	97	94	0	0	0	0	0	0	0	0	0	0	0	0	0	0	0	0	0	0	0	1.298	1.353	1.353	1.582	2.156	1.324	0.884	0.000	0.000	0.000	0.000	0.000	0.000	0.000	0.000	0.000	0.000	0.000	0.000	0.000	0.000	120	432	19630	17131	0.376	Error	Error	11087	8543	0	0	9852	7279	0	0	0	0
1	11	2	"DOS2"	"YDR068W"	4240	13570	140	20629	15608	10704	100	107	46	96	95	0	5251	4161	3141	102	106	34	89	85	0	0	0	0	0	0	0	0	0	0	0	0	0	0	0	0	0	0	0	3.987	3.821	3.816	4.375	2.264	3.829	0.880	0.000	0.000	0.000	0.000	0.000	0.000	0.000	0.000	0.000	0.000	0.000	0.000	0.000	0.000	156	557	25678	19567	1.995	Error	Error	20529	5149	0	0	15508	4059	0	0	0	0
1	12	2	""	"YDR010C"	4430	13570	120	2044	1659	954	96	102	42	92	87	0	4002	3154	1909	96	104	42	88	85	0	0	0	0	0	0	0	0	0	0	0	0	0	0	0	0	0	0	0	0.499	0.511	0.527	0.542	1.979	0.484	0.886	0.000	0.000	0.000	0.000	0.000	0.000	0.000	0.000	0.000	0.000	0.000	0.000	0.000	0.000	120	452	5854	4621	-1.004	Error	Error	1948	3906	0	0	1563	3058	0	0	0	0
1	13	2	"ENA5"	"YDR038C"	4620	13570	120	4460	4381	2675	96	113	106	91	90	0	3364	3626	2600	98	144	403	84	79	0	0	0	0	0	0	0	0	0	0	0	0	0	0	0	0	0	0	0	1.336	1.215	1.259	1.373	2.266	1.203	0.720	0.000	0.000	0.000	0.000	0.000	0.000	0.000	0.000	0.000	0.000	0.000	0.000	0.000	0.000	120	484	7630	7813	0.418	Error	Error	4364	3266	0	0	4285	3528	0	0	0	0
1	14	2	""	"YDR070C"	4820	13560	130	1502	1256	788	103	162	378	73	64	0	1407	1131	759	99	162	418	68	63	0	0	0	0	0	0	0	0	0	0	0	0	0	0	0	0	0	0	0	1.070	1.117	1.087	1.161	2.109	0.940	0.687	0.000	0.000	0.000	0.000	0.000	0.000	0.000	0.000	0.000	0.000	0.000	0.000	0.000	0.000	120	553	2707	2185	0.097	Error	Error	1399	1308	0	0	1153	1032	0	0	0	0
1	15	2	""	"YDR366C"	5030	13560	110	12643	9878	6178	122	435	1499	76	73	0	7974	5818	3896	109	370	1085	72	70	0	0	0	0	0	0	0	0	0	0	0	0	0	0	0	0	0	0	0	1.592	1.709	1.791	2.082	2.363	1.701	0.902	0.000	0.000	0.000	0.000	0.000	0.000	0.000	0.000	0.000	0.000	0.000	0.000	0.000	0.000	80	416	20386	15465	0.671	Error	Error	12521	7865	0	0	9756	5709	0	0	0	0
1	16	2	""	"YDR398W"	5210	13560	120	1964	2059	1300	132	414	1473	61	21	0	3929	4233	2940	121	352	1059	80	71	0	0	0	0	0	0	0	0	0	0	0	0	0	0	0	0	0	0	0	0.481	0.469	0.475	0.473	2.104	0.590	0.618	0.000	0.000	0.000	0.000	0.000	0.000	0.000	0.000	0.000	0.000	0.000	0.000	0.000	0.000	120	426	5640	6039	-1.056	Error	Error	1832	3808	0	0	1927	4112	0	0	0	0
1	17	2	""	"YDR430C"	5400	13560	120	1428	1465	879	113	123	55	95	91	0	3294	3788	2939	110	127	104	93	90	0	0	0	0	0	0	0	0	0	0	0	0	0	0	0	0	0	0	0	0.413	0.368	0.404	0.448	2.267	0.301	0.710	0.000	0.000	0.000	0.000	0.000	0.000	0.000	0.000	0.000	0.000	0.000	0.000	0.000	0.000	120	457	4499	5030	-1.276	Error	Error	1315	3184	0	0	1352	3678	0	0	0	0
1	18	2	"YPR1"	"YDR368W"	5590	13560	120	4695	4213	2116	109	143	226	90	88	0	2632	2315	1281	109	144	238	87	83	0	0	0	0	0	0	0	0	0	0	0	0	0	0	0	0	0	0	0	1.818	1.860	1.915	1.941	1.824	1.854	0.856	0.000	0.000	0.000	0.000	0.000	0.000	0.000	0.000	0.000	0.000	0.000	0.000	0.000	0.000	120	445	7109	6310	0.862	Error	Error	4586	2523	0	0	4104	2206	0	0	0	0
1	19	2	""	"YDR400W"	5790	13560	120	6332	6156	3540	116	143	212	95	90	0	5585	5432	3433	111	144	225	89	87	0	0	0	0	0	0	0	0	0	0	0	0	0	0	0	0	0	0	0	1.136	1.135	1.192	1.344	2.245	1.103	0.852	0.000	0.000	0.000	0.000	0.000	0.000	0.000	0.000	0.000	0.000	0.000	0.000	0.000	0.000	120	495	11690	11361	0.183	Error	Error	6216	5474	0	0	6040	5321	0	0	0	0
1	20	2	"NPL3"	"YDR432W"	6010	13560	120	3656	3378	1620	115	129	75	97	95	0	6368	5756	2986	113	123	49	96	95	0	0	0	0	0	0	0	0	0	0	0	0	0	0	0	0	0	0	0	0.566	0.578	0.593	0.621	1.875	0.545	0.867	0.000	0.000	0.000	0.000	0.000	0.000	0.000	0.000	0.000	0.000	0.000	0.000	0.000	0.000	120	426	9796	8906	-0.821	Error	Error	3541	6255	0	0	3263	5643	0	0	0	0
1	21	2	""	"YDR370C"	6140	13560	110	4109	3207	1935	116	355	865	76	71	0	10130	8197	4972	123	780	2334	77	72	0	0	0	0	0	0	0	0	0	0	0	0	0	0	0	0	0	0	0	0.399	0.383	0.392	0.418	2.229	0.370	0.902	0.000	0.000	0.000	0.000	0.000	0.000	0.000	0.000	0.000	0.000	0.000	0.000	0.000	0.000	80	377	14000	11165	-1.325	Error	Error	3993	10007	0	0	3091	8074	0	0	0	0
1	22	2	"DIT2"	"YDR402C"	6350	13560	120	8345	8015	4288	112	340	1013	90	85	0	5179	5001	3131	112	590	1932	76	63	0	0	0	0	0	0	0	0	0	0	0	0	0	0	0	0	0	0	0	1.625	1.616	1.617	1.776	2.076	1.547	0.839	0.000	0.000	0.000	0.000	0.000	0.000	0.000	0.000	0.000	0.000	0.000	0.000	0.000	0.000	120	610	13300	12792	0.700	Error	Error	8233	5067	0	0	7903	4889	0	0	0	0
1	1	3	""	"YDR434W"	2410	13750	120	3411	3593	2345	78	101	298	95	89	0	2959	2965	2124	80	117	507	84	79	0	0	0	0	0	0	0	0	0	0	0	0	0	0	0	0	0	0	0	1.158	1.218	1.273	1.433	2.401	1.178	0.868	0.000	0.000	0.000	0.000	0.000	0.000	0.000	0.000	0.000	0.000	0.000	0.000	0.000	0.000	120	480	6212	6400	0.211	Error	Error	3333	2879	0	0	3515	2885	0	0	0	0
1	2	3	""	"YDR372C"	2560	13760	120	5044	4643	2138	90	152	630	94	87	0	3561	3231	1710	90	190	849	84	80	0	0	0	0	0	0	0	0	0	0	0	0	0	0	0	0	0	0	0	1.427	1.450	1.425	1.584	1.922	1.381	0.882	0.000	0.000	0.000	0.000	0.000	0.000	0.000	0.000	0.000	0.000	0.000	0.000	0.000	0.000	120	458	8425	7694	0.513	Error	Error	4954	3471	0	0	4553	3141	0	0	0	0
1	3	3	"rpb7"	"YDR404C"	2770	13750	120	4182	4219	2824	99	113	115	94	91	0	3324	3254	2182	98	115	122	90	86	0	0	0	0	0	0	0	0	0	0	0	0	0	0	0	0	0	0	0	1.266	1.305	1.296	1.420	2.036	1.306	0.883	0.000	0.000	0.000	0.000	0.000	0.000	0.000	0.000	0.000	0.000	0.000	0.000	0.000	0.000	120	492	7309	7276	0.340	Error	Error	4083	3226	0	0	4120	3156	0	0	0	0
1	4	3	"PPZ2"	"YDR436W"	2940	13750	120	3119	3056	1995	103	109	52	96	96	0	6120	6089	4614	105	118	60	91	89	0	0	0	0	0	0	0	0	0	0	0	0	0	0	0	0	0	0	0	0.501	0.493	0.502	0.670	2.857	0.435	0.821	0.000	0.000	0.000	0.000	0.000	0.000	0.000	0.000	0.000	0.000	0.000	0.000	0.000	0.000	120	531	9031	8937	-0.996	Error	Error	3016	6015	0	0	2953	5984	0	0	0	0
1	5	3	"LSM4"	"YER112W"	3230	13740	140	3735	2975	1871	96	159	533	77	72	0	4321	3365	2381	101	144	372	71	70	0	0	0	0	0	0	0	0	0	0	0	0	0	0	0	0	0	0	0	0.862	0.882	0.904	1.253	2.855	0.830	0.927	0.000	0.000	0.000	0.000	0.000	0.000	0.000	0.000	0.000	0.000	0.000	0.000	0.000	0.000	156	646	7859	6143	-0.214	Error	Error	3639	4220	0	0	2879	3264	0	0	0	0
1	6	3	"COX15"	"YER141W"	3390	13740	110	12565	11836	7998	98	333	1090	90	86	0	7151	6608	4651	101	264	762	83	76	0	0	0	0	0	0	0	0	0	0	0	0	0	0	0	0	0	0	0	1.768	1.804	1.826	2.225	2.103	1.805	0.918	0.000	0.000	0.000	0.000	0.000	0.000	0.000	0.000	0.000	0.000	0.000	0.000	0.000	0.000	80	324	19517	18245	0.822	Error	Error	12467	7050	0	0	11738	6507	0	0	0	0
1	7	3	"BRR2"	"YER172C"	3540	13750	150	143	223	175	102	193	583	1	0	0	127	233	222	106	197	442	5	1	0	0	0	0	0	0	0	0	0	0	0	0	0	0	0	0	0	0	0	1.952	0.953	1.018	1.169	2.727	1.596	0.836	0.000	0.000	0.000	0.000	0.000	0.000	0.000	0.000	0.000	0.000	0.000	0.000	0.000	0.000	156	657	62	248	0.965	Error	Error	41	21	0	0	121	127	0	0	-50	0
1	8	3	"BOI2"	"YER114C"	3770	13740	110	1358	1316	927	94	120	122	92	82	0	3143	3274	3056	102	128	100	88	85	0	0	0	0	0	0	0	0	0	0	0	0	0	0	0	0	0	0	0	0.416	0.385	0.429	0.477	2.151	0.329	0.838	0.000	0.000	0.000	0.000	0.000	0.000	0.000	0.000	0.000	0.000	0.000	0.000	0.000	0.000	80	462	4305	4394	-1.267	Error	Error	1264	3041	0	0	1222	3172	0	0	0	0
1	9	3	"DDI1"	"YER143W"	3960	13750	120	13922	13450	7973	92	110	113	99	98	0	5340	4889	3207	102	108	68	93	90	0	0	0	0	0	0	0	0	0	0	0	0	0	0	0	0	0	0	0	2.640	2.790	2.814	3.365	2.143	2.770	0.904	0.000	0.000	0.000	0.000	0.000	0.000	0.000	0.000	0.000	0.000	0.000	0.000	0.000	0.000	120	498	19068	18145	1.401	Error	Error	13830	5238	0	0	13358	4787	0	0	0	0
1	10	3	"GRX4"	"YER174C"	4150	13740	110	1785	1730	1116	93	107	111	88	87	0	1659	1504	939	101	105	39	88	87	0	0	0	0	0	0	0	0	0	0	0	0	0	0	0	0	0	0	0	1.086	1.167	1.116	1.303	2.407	1.150	0.845	0.000	0.000	0.000	0.000	0.000	0.000	0.000	0.000	0.000	0.000	0.000	0.000	0.000	0.000	80	454	3250	3040	0.119	Error	Error	1692	1558	0	0	1637	1403	0	0	0	0
1	11	3	""	"YER116C"	4360	13750	130	2527	2195	1040	91	94	35	98	96	0	8586	7327	3988	96	102	33	100	98	0	0	0	0	0	0	0	0	0	0	0	0	0	0	0	0	0	0	0	0.287	0.291	0.290	0.330	2.054	0.266	0.882	0.000	0.000	0.000	0.000	0.000	0.000	0.000	0.000	0.000	0.000	0.000	0.000	0.000	0.000	120	536	10926	9335	-1.801	Error	Error	2436	8490	0	0	2104	7231	0	0	0	0
1	12	3	"FTR1"	"YER145C"	4540	13750	120	3166	2846	1388	92	100	77	97	95	0	6771	5876	3104	95	103	39	96	92	0	0	0	0	0	0	0	0	0	0	0	0	0	0	0	0	0	0	0	0.460	0.476	0.476	0.574	2.278	0.459	0.909	0.000	0.000	0.000	0.000	0.000	0.000	0.000	0.000	0.000	0.000	0.000	0.000	0.000	0.000	120	468	9750	8535	-1.119	Error	Error	3074	6676	0	0	2754	5781	0	0	0	0
1	13	3	"ECM32"	"YER176W"	4720	13740	110	786	1009	1123	95	110	101	88	80	0	2100	2493	2780	96	108	51	88	86	0	0	0	0	0	0	0	0	0	0	0	0	0	0	0	0	0	0	0	0.345	0.381	0.386	0.435	2.494	0.381	0.880	0.000	0.000	0.000	0.000	0.000	0.000	0.000	0.000	0.000	0.000	0.000	0.000	0.000	0.000	80	454	2695	3311	-1.536	Error	Error	691	2004	0	0	914	2397	0	0	0	0
1	14	3	"SSU81"	"YER118C"	4930	13740	140	12965	11348	7281	107	156	424	85	85	0	7237	5969	4226	103	148	292	78	76	0	0	0	0	0	0	0	0	0	0	0	0	0	0	0	0	0	0	0	1.802	1.916	1.885	2.285	2.165	1.882	0.928	0.000	0.000	0.000	0.000	0.000	0.000	0.000	0.000	0.000	0.000	0.000	0.000	0.000	0.000	156	609	19992	17107	0.850	Error	Error	12858	7134	0	0	11241	5866	0	0	0	0
1	15	3	""	"YER147C"	5120	13740	140	3695	3543	2422	122	346	1335	72	61	0	6661	5974	4591	112	283	941	73	68	0	0	0	0	0	0	0	0	0	0	0	0	0	0	0	0	0	0	0	0.546	0.584	0.606	0.765	2.555	0.552	0.883	0.000	0.000	0.000	0.000	0.000	0.000	0.000	0.000	0.000	0.000	0.000	0.000	0.000	0.000	156	516	10122	9283	-0.874	Error	Error	3573	6549	0	0	3421	5862	0	0	0	0
1	16	3	"pda1"	"YER178W"	5300	13750	120	6400	6193	3826	115	120	53	99	98	0	4506	4411	2877	108	121	89	92	90	0	0	0	0	0	0	0	0	0	0	0	0	0	0	0	0	0	0	0	1.429	1.413	1.407	1.696	2.125	1.416	0.905	0.000	0.000	0.000	0.000	0.000	0.000	0.000	0.000	0.000	0.000	0.000	0.000	0.000	0.000	120	449	10683	10381	0.515	Error	Error	6285	4398	0	0	6078	4303	0	0	0	0
1	17	3	"pmr1"	"YGL167C"	5500	13750	140	197	217	125	113	126	69	56	33	0	203	218	121	108	120	58	63	42	0	0	0	0	0	0	0	0	0	0	0	0	0	0	0	0	0	0	0	0.884	0.945	0.956	0.897	2.433	1.024	0.371	0.000	0.000	0.000	0.000	0.000	0.000	0.000	0.000	0.000	0.000	0.000	0.000	0.000	0.000	156	548	179	214	-0.178	Error	Error	84	95	0	0	104	110	0	0	0	0
1	18	3	""	"YGL199C"	5690	13750	140	1112	1001	657	114	144	208	71	65	0	4626	4064	3032	108	143	222	79	76	0	0	0	0	0	0	0	0	0	0	0	0	0	0	0	0	0	0	0	0.221	0.224	0.222	0.286	3.008	0.211	0.896	0.000	0.000	0.000	0.000	0.000	0.000	0.000	0.000	0.000	0.000	0.000	0.000	0.000	0.000	156	534	5516	4843	-2.179	Error	Error	998	4518	0	0	887	3956	0	0	0	0
1	19	3	""	"YGL230C"	5880	13750	140	3881	3101	2176	113	122	51	94	87	0	2211	1958	1395	109	119	43	83	80	0	0	0	0	0	0	0	0	0	0	0	0	0	0	0	0	0	0	0	1.793	1.616	1.530	1.711	2.176	1.666	0.906	0.000	0.000	0.000	0.000	0.000	0.000	0.000	0.000	0.000	0.000	0.000	0.000	0.000	0.000	156	527	5870	4837	0.842	Error	Error	3768	2102	0	0	2988	1849	0	0	0	0
1	20	3	"SUA5"	"YGL169W"	6070	13750	140	4692	4185	3089	115	177	415	78	72	0	2621	2440	2037	112	239	1002	59	52	0	0	0	0	0	0	0	0	0	0	0	0	0	0	0	0	0	0	0	1.824	1.748	1.707	2.054	1.947	1.636	0.913	0.000	0.000	0.000	0.000	0.000	0.000	0.000	0.000	0.000	0.000	0.000	0.000	0.000	0.000	156	496	7086	6398	0.867	Error	Error	4577	2509	0	0	4070	2328	0	0	0	0
1	21	3	"MCM6"	"YGL201C"	6240	13750	120	1271	1451	1017	110	219	598	79	47	0	1071	1213	922	111	384	1530	24	4	0	0	0	0	0	0	0	0	0	0	0	0	0	0	0	0	0	0	0	1.209	1.217	1.243	1.370	1.906	1.147	0.789	0.000	0.000	0.000	0.000	0.000	0.000	0.000	0.000	0.000	0.000	0.000	0.000	0.000	0.000	120	500	2121	2443	0.274	Error	Error	1161	960	0	0	1341	1102	0	0	0	0
1	22	3	""	"YGL232W"	6430	13750	110	11422	9727	5275	117	273	941	92	86	0	5238	4464	2642	113	221	564	82	75	0	0	0	0	0	0	0	0	0	0	0	0	0	0	0	0	0	0	0	2.206	2.209	2.184	2.659	2.235	2.191	0.910	0.000	0.000	0.000	0.000	0.000	0.000	0.000	0.000	0.000	0.000	0.000	0.000	0.000	0.000	80	488	16430	13961	1.141	Error	Error	11305	5125	0	0	9610	4351	0	0	0	0
1	1	4	"ROK1"	"YGL171W"	2430	13940	110	10449	9186	3380	83	320	1417	95	91	0	8139	7039	2856	86	312	1297	91	86	0	0	0	0	0	0	0	0	0	0	0	0	0	0	0	0	0	0	0	1.287	1.309	1.304	1.379	1.568	1.272	0.930	0.000	0.000	0.000	0.000	0.000	0.000	0.000	0.000	0.000	0.000	0.000	0.000	0.000	0.000	80	542	18419	16056	0.364	Error	Error	10366	8053	0	0	9103	6953	0	0	0	0
1	2	4	"kex1"	"YGL203C"	2630	13940	110	4144	3800	2104	94	321	1390	81	71	0	9159	8923	5429	96	367	1350	85	82	0	0	0	0	0	0	0	0	0	0	0	0	0	0	0	0	0	0	0	0.447	0.420	0.429	0.487	2.198	0.398	0.886	0.000	0.000	0.000	0.000	0.000	0.000	0.000	0.000	0.000	0.000	0.000	0.000	0.000	0.000	80	530	13113	12533	-1.162	Error	Error	4050	9063	0	0	3706	8827	0	0	0	0
1	3	4	"ade5,7"	"YGL234W"	2830	13940	110	4069	3713	2069	93	129	236	100	88	0	10655	9784	5652	99	222	748	91	87	0	0	0	0	0	0	0	0	0	0	0	0	0	0	0	0	0	0	0	0.377	0.374	0.381	0.398	1.599	0.359	0.898	0.000	0.000	0.000	0.000	0.000	0.000	0.000	0.000	0.000	0.000	0.000	0.000	0.000	0.000	80	484	14532	13305	-1.409	Error	Error	3976	10556	0	0	3620	9685	0	0	0	0
1	4	4	"KEM1"	"YGL173C"	3010	13950	120	1030	1221	1021	91	115	203	90	81	0	1530	1749	1593	102	185	650	75	52	0	0	0	0	0	0	0	0	0	0	0	0	0	0	0	0	0	0	0	0.658	0.686	0.666	0.747	2.077	0.556	0.712	0.000	0.000	0.000	0.000	0.000	0.000	0.000	0.000	0.000	0.000	0.000	0.000	0.000	0.000	120	552	2367	2777	-0.605	Error	Error	939	1428	0	0	1130	1647	0	0	0	0
1	5	4	"POX1"	"YGL205W"	3210	13940	120	3541	3472	1633	89	97	45	100	98	0	8307	7969	4372	100	111	74	99	95	0	0	0	0	0	0	0	0	0	0	0	0	0	0	0	0	0	0	0	0.421	0.430	0.425	0.489	1.804	0.398	0.868	0.000	0.000	0.000	0.000	0.000	0.000	0.000	0.000	0.000	0.000	0.000	0.000	0.000	0.000	120	562	11659	11252	-1.249	Error	Error	3452	8207	0	0	3383	7869	0	0	0	0
1	6	4	""	"YGL236C"	3400	13940	120	7594	7041	3406	93	149	559	95	90	0	6198	5477	2924	101	139	331	92	90	0	0	0	0	0	0	0	0	0	0	0	0	0	0	0	0	0	0	0	1.230	1.292	1.302	1.473	1.972	1.271	0.925	0.000	0.000	0.000	0.000	0.000	0.000	0.000	0.000	0.000	0.000	0.000	0.000	0.000	0.000	120	551	13598	12324	0.299	Error	Error	7501	6097	0	0	6948	5376	0	0	0	0
1	7	4	"RNH70"	"YGR276C"	3610	13940	140	2949	2484	1449	93	110	105	84	83	0	7014	5571	3649	102	120	89	83	81	0	0	0	0	0	0	0	0	0	0	0	0	0	0	0	0	0	0	0	0.413	0.437	0.435	0.536	2.357	0.406	0.911	0.000	0.000	0.000	0.000	0.000	0.000	0.000	0.000	0.000	0.000	0.000	0.000	0.000	0.000	156	594	9768	7860	-1.275	Error	Error	2856	6912	0	0	2391	5469	0	0	0	0
1	8	4	""	"YHL010C"	3800	13940	140	3822	3277	2073	92	104	104	89	87	0	7047	5941	3899	99	110	79	85	80	0	0	0	0	0	0	0	0	0	0	0	0	0	0	0	0	0	0	0	0.537	0.545	0.559	0.643	2.186	0.533	0.932	0.000	0.000	0.000	0.000	0.000	0.000	0.000	0.000	0.000	0.000	0.000	0.000	0.000	0.000	156	610	10678	9027	-0.897	Error	Error	3730	6948	0	0	3185	5842	0	0	0	0
1	9	4	""	"YHL042W"	3980	13940	110	2890	2510	1154	92	108	100	100	93	0	5108	4261	2105	103	134	229	91	90	0	0	0	0	0	0	0	0	0	0	0	0	0	0	0	0	0	0	0	0.559	0.582	0.599	0.673	2.061	0.569	0.914	0.000	0.000	0.000	0.000	0.000	0.000	0.000	0.000	0.000	0.000	0.000	0.000	0.000	0.000	80	449	7803	6576	-0.839	Error	Error	2798	5005	0	0	2418	4158	0	0	0	0
1	10	4	""	"YGR278W"	4160	13940	110	6670	6065	2623	95	172	430	95	93	0	7823	7247	3360	104	252	789	88	88	0	0	0	0	0	0	0	0	0	0	0	0	0	0	0	0	0	0	0	0.852	0.836	0.835	0.890	1.655	0.802	0.913	0.000	0.000	0.000	0.000	0.000	0.000	0.000	0.000	0.000	0.000	0.000	0.000	0.000	0.000	80	505	14294	13113	-0.231	Error	Error	6575	7719	0	0	5970	7143	0	0	0	0
1	11	4	""	"YHL012W"	4350	13950	120	10615	9035	4248	100	164	404	99	95	0	8796	7328	4043	108	228	731	86	80	0	0	0	0	0	0	0	0	0	0	0	0	0	0	0	0	0	0	0	1.210	1.238	1.252	1.568	2.370	1.195	0.900	0.000	0.000	0.000	0.000	0.000	0.000	0.000	0.000	0.000	0.000	0.000	0.000	0.000	0.000	120	553	19203	16155	0.275	Error	Error	10515	8688	0	0	8935	7220	0	0	0	0
1	12	4	""	"YHL044W"	4550	13950	120	7420	6176	2892	104	113	64	99	98	0	5826	4717	2494	107	126	153	91	90	0	0	0	0	0	0	0	0	0	0	0	0	0	0	0	0	0	0	0	1.279	1.317	1.321	1.573	2.100	1.296	0.909	0.000	0.000	0.000	0.000	0.000	0.000	0.000	0.000	0.000	0.000	0.000	0.000	0.000	0.000	120	542	13035	10682	0.355	Error	Error	7316	5719	0	0	6072	4610	0	0	0	0
1	13	4	""	"YGR280C"	4750	13950	140	2074	1889	1262	96	105	70	87	83	0	3412	2931	2245	102	110	38	83	78	0	0	0	0	0	0	0	0	0	0	0	0	0	0	0	0	0	0	0	0.598	0.634	0.632	0.757	2.279	0.583	0.906	0.000	0.000	0.000	0.000	0.000	0.000	0.000	0.000	0.000	0.000	0.000	0.000	0.000	0.000	156	601	5288	4622	-0.743	Error	Error	1978	3310	0	0	1793	2829	0	0	0	0
1	14	4	"YLF2"	"YHL014C"	4920	13950	120	21355	18679	7237	105	117	59	100	100	0	5745	4974	2213	106	115	48	94	93	0	0	0	0	0	0	0	0	0	0	0	0	0	0	0	0	0	0	0	3.768	3.816	3.797	4.263	1.808	3.845	0.915	0.000	0.000	0.000	0.000	0.000	0.000	0.000	0.000	0.000	0.000	0.000	0.000	0.000	0.000	120	460	26889	23442	1.914	Error	Error	21250	5639	0	0	18574	4868	0	0	0	0
1	15	4	""	"YHL046C"	5110	13940	120	28167	25966	14389	130	153	93	100	100	0	13885	12043	7015	115	130	59	100	99	0	0	0	0	0	0	0	0	0	0	0	0	0	0	0	0	0	0	0	2.036	2.166	2.200	2.380	1.780	2.206	0.923	0.000	0.000	0.000	0.000	0.000	0.000	0.000	0.000	0.000	0.000	0.000	0.000	0.000	0.000	120	514	41807	37764	1.026	Error	Error	28037	13770	0	0	25836	11928	0	0	0	0
1	16	4	"BGL2"	"YGR282C"	5300	13940	130	8549	7030	3318	128	151	102	98	97	0	4897	4080	2095	118	133	64	95	93	0	0	0	0	0	0	0	0	0	0	0	0	0	0	0	0	0	0	0	1.762	1.742	1.738	1.939	1.931	1.715	0.923	0.000	0.000	0.000	0.000	0.000	0.000	0.000	0.000	0.000	0.000	0.000	0.000	0.000	0.000	120	588	13200	10864	0.817	Error	Error	8421	4779	0	0	6902	3962	0	0	0	0
1	17	4	"dur3"	"YHL016C"	5490	13950	120	16030	14020	5869	120	147	151	100	100	0	8674	7881	3756	110	132	172	95	92	0	0	0	0	0	0	0	0	0	0	0	0	0	0	0	0	0	0	0	1.858	1.789	1.777	2.109	2.122	1.795	0.902	0.000	0.000	0.000	0.000	0.000	0.000	0.000	0.000	0.000	0.000	0.000	0.000	0.000	0.000	120	520	24474	21671	0.894	Error	Error	15910	8564	0	0	13900	7771	0	0	0	0
1	18	4	"COS8"	"YHL048W"	5670	13940	110	11793	10468	5255	116	162	270	96	92	0	12211	10713	5696	107	155	342	88	87	0	0	0	0	0	0	0	0	0	0	0	0	0	0	0	0	0	0	0	0.965	0.976	1.022	1.218	2.341	0.968	0.900	0.000	0.000	0.000	0.000	0.000	0.000	0.000	0.000	0.000	0.000	0.000	0.000	0.000	0.000	80	471	23781	20958	-0.052	Error	Error	11677	12104	0	0	10352	10606	0	0	0	0
1	19	4	"THS1"	"YIL078W"	5880	13940	130	7297	6479	3590	113	142	226	92	91	0	7759	6537	3930	112	150	311	85	81	0	0	0	0	0	0	0	0	0	0	0	0	0	0	0	0	0	0	0	0.939	0.991	1.013	1.204	2.156	0.971	0.887	0.000	0.000	0.000	0.000	0.000	0.000	0.000	0.000	0.000	0.000	0.000	0.000	0.000	0.000	120	580	14831	12791	-0.090	Error	Error	7184	7647	0	0	6366	6425	0	0	0	0
1	20	4	""	"YIL110W"	6060	13950	120	20118	16564	7538	116	151	264	100	100	0	7604	6225	3236	111	153	286	92	87	0	0	0	0	0	0	0	0	0	0	0	0	0	0	0	0	0	0	0	2.669	2.690	2.633	3.060	1.850	2.631	0.913	0.000	0.000	0.000	0.000	0.000	0.000	0.000	0.000	0.000	0.000	0.000	0.000	0.000	0.000	120	542	27495	22562	1.417	Error	Error	20002	7493	0	0	16448	6114	0	0	0	0
1	21	4	"CCT2"	"YIL142W"	6250	13940	110	4767	4027	1956	107	145	282	95	92	0	7352	6440	3489	109	147	303	96	88	0	0	0	0	0	0	0	0	0	0	0	0	0	0	0	0	0	0	0	0.643	0.619	0.629	0.668	1.720	0.577	0.900	0.000	0.000	0.000	0.000	0.000	0.000	0.000	0.000	0.000	0.000	0.000	0.000	0.000	0.000	80	476	11903	10251	-0.636	Error	Error	4660	7243	0	0	3920	6331	0	0	0	0
1	22	4	""	"YIL080W"	6440	13950	140	21788	16511	9731	118	189	615	91	87	0	16950	12446	8491	114	171	400	78	77	0	0	0	0	0	0	0	0	0	0	0	0	0	0	0	0	0	0	0	1.287	1.329	1.294	1.997	2.893	1.252	0.933	0.000	0.000	0.000	0.000	0.000	0.000	0.000	0.000	0.000	0.000	0.000	0.000	0.000	0.000	156	755	38506	28725	0.364	Error	Error	21670	16836	0	0	16393	12332	0	0	0	0
1	1	5	""	"YIL112W"	2450	14130	110	6437	6060	3587	86	176	679	88	85	0	7072	7034	4402	89	172	636	90	85	0	0	0	0	0	0	0	0	0	0	0	0	0	0	0	0	0	0	0	0.909	0.860	0.876	0.955	1.944	0.857	0.898	0.000	0.000	0.000	0.000	0.000	0.000	0.000	0.000	0.000	0.000	0.000	0.000	0.000	0.000	80	570	13334	12919	-0.137	Error	Error	6351	6983	0	0	5974	6945	0	0	0	0
1	2	5	"TID3"	"YIL144W"	2650	14140	120	8673	8312	4177	94	136	277	100	98	0	8239	7342	3863	96	170	493	95	90	0	0	0	0	0	0	0	0	0	0	0	0	0	0	0	0	0	0	0	1.054	1.134	1.102	1.249	1.944	1.121	0.880	0.000	0.000	0.000	0.000	0.000	0.000	0.000	0.000	0.000	0.000	0.000	0.000	0.000	0.000	120	583	16722	15464	0.075	Error	Error	8579	8143	0	0	8218	7246	0	0	0	0
1	3	5	""	"YIL082W-A"	2840	14140	120	967	908	327	92	116	208	92	85	0	771	723	283	99	155	562	66	1	0	0	0	0	0	0	0	0	0	0	0	0	0	0	0	0	0	0	0	1.302	1.308	1.258	1.350	1.718	1.289	0.811	0.000	0.000	0.000	0.000	0.000	0.000	0.000	0.000	0.000	0.000	0.000	0.000	0.000	0.000	120	508	1547	1440	0.381	Error	Error	875	672	0	0	816	624	0	0	0	0
1	4	5	"POR2"	"YIL114C"	3030	14140	120	1450	1295	606	89	98	72	98	90	0	5165	4354	2092	99	103	33	97	95	0	0	0	0	0	0	0	0	0	0	0	0	0	0	0	0	0	0	0	0.269	0.283	0.288	0.299	1.864	0.274	0.892	0.000	0.000	0.000	0.000	0.000	0.000	0.000	0.000	0.000	0.000	0.000	0.000	0.000	0.000	120	427	6427	5461	-1.896	Error	Error	1361	5066	0	0	1206	4255	0	0	0	0
1	5	5	"ECM37"	"YIL146C"	3190	14150	110	357	388	182	92	106	83	90	78	0	694	661	343	101	111	68	86	86	0	0	0	0	0	0	0	0	0	0	0	0	0	0	0	0	0	0	0	0.447	0.529	0.507	0.531	1.522	0.503	0.665	0.000	0.000	0.000	0.000	0.000	0.000	0.000	0.000	0.000	0.000	0.000	0.000	0.000	0.000	80	446	858	856	-1.162	Error	Error	265	593	0	0	296	560	0	0	0	0
1	6	5	"SDS3"	"YIL084C"	3380	14140	110	2826	2497	961	101	147	466	90	87	0	7417	6519	2465	104	201	640	96	92	0	0	0	0	0	0	0	0	0	0	0	0	0	0	0	0	0	0	0	0.373	0.373	0.361	0.377	1.461	0.359	0.928	0.000	0.000	0.000	0.000	0.000	0.000	0.000	0.000	0.000	0.000	0.000	0.000	0.000	0.000	80	523	10038	8811	-1.424	Error	Error	2725	7313	0	0	2396	6415	0	0	0	0
1	7	5	"his5"	"YIL116W"	3580	14140	130	6644	5199	3016	104	130	170	94	90	0	5843	4694	3034	106	198	581	77	75	0	0	0	0	0	0	0	0	0	0	0	0	0	0	0	0	0	0	0	1.140	1.111	1.108	1.354	2.187	1.047	0.887	0.000	0.000	0.000	0.000	0.000	0.000	0.000	0.000	0.000	0.000	0.000	0.000	0.000	0.000	120	593	12277	9683	0.189	Error	Error	6540	5737	0	0	5095	4588	0	0	0	0
1	8	5	"RPL40A"	"YIL148W"	3760	14140	120	3355	3102	1560	99	118	150	95	91	0	5016	4428	2342	106	144	309	88	85	0	0	0	0	0	0	0	0	0	0	0	0	0	0	0	0	0	0	0	0.663	0.695	0.679	0.804	2.021	0.676	0.896	0.000	0.000	0.000	0.000	0.000	0.000	0.000	0.000	0.000	0.000	0.000	0.000	0.000	0.000	120	504	8166	7325	-0.593	Error	Error	3256	4910	0	0	3003	4322	0	0	0	0
1	9	5	"ilv3"	"YJR016C"	3960	14140	120	9830	9064	3723	101	113	81	100	100	0	2915	2675	1278	106	122	178	91	90	0	0	0	0	0	0	0	0	0	0	0	0	0	0	0	0	0	0	0	3.464	3.489	3.456	3.914	1.781	3.452	0.917	0.000	0.000	0.000	0.000	0.000	0.000	0.000	0.000	0.000	0.000	0.000	0.000	0.000	0.000	120	535	12538	11532	1.792	Error	Error	9729	2809	0	0	8963	2569	0	0	0	0
1	10	5	"cyc1"	"YJR048W"	4150	14140	120	2447	2121	943	107	139	278	90	84	0	2124	1857	829	113	157	429	85	82	0	0	0	0	0	0	0	0	0	0	0	0	0	0	0	0	0	0	0	1.164	1.155	1.152	1.180	1.782	1.157	0.897	0.000	0.000	0.000	0.000	0.000	0.000	0.000	0.000	0.000	0.000	0.000	0.000	0.000	0.000	120	505	4351	3758	0.219	Error	Error	2340	2011	0	0	2014	1744	0	0	0	0
1	11	5	""	"YJR080C"	4320	14140	120	3290	3057	1866	109	122	87	94	90	0	5004	4610	3118	117	128	64	93	90	0	0	0	0	0	0	0	0	0	0	0	0	0	0	0	0	0	0	0	0.651	0.656	0.683	0.764	2.010	0.618	0.909	0.000	0.000	0.000	0.000	0.000	0.000	0.000	0.000	0.000	0.000	0.000	0.000	0.000	0.000	120	488	8068	7441	-0.619	Error	Error	3181	4887	0	0	2948	4493	0	0	0	0
1	12	5	""	"YJR018W"	4510	14140	110	3233	2812	1055	107	130	156	100	95	0	3398	2983	1202	111	159	316	93	87	0	0	0	0	0	0	0	0	0	0	0	0	0	0	0	0	0	0	0	0.951	0.942	0.929	1.037	1.902	0.913	0.928	0.000	0.000	0.000	0.000	0.000	0.000	0.000	0.000	0.000	0.000	0.000	0.000	0.000	0.000	80	464	6413	5577	-0.072	Error	Error	3126	3287	0	0	2705	2872	0	0	0	0
1	13	5	"ISY1"	"YJR050W"	4700	14140	120	2032	1904	762	99	141	295	95	90	0	4405	3839	1763	106	184	496	90	86	0	0	0	0	0	0	0	0	0	0	0	0	0	0	0	0	0	0	0	0.450	0.484	0.488	0.568	2.135	0.458	0.893	0.000	0.000	0.000	0.000	0.000	0.000	0.000	0.000	0.000	0.000	0.000	0.000	0.000	0.000	120	535	6232	5538	-1.153	Error	Error	1933	4299	0	0	1805	3733	0	0	0	0
1	14	5	""	"YJR083C"	4890	14140	120	2655	2360	1161	99	105	43	98	96	0	6954	6249	3350	107	111	36	97	96	0	0	0	0	0	0	0	0	0	0	0	0	0	0	0	0	0	0	0	0.373	0.368	0.368	0.411	1.857	0.343	0.879	0.000	0.000	0.000	0.000	0.000	0.000	0.000	0.000	0.000	0.000	0.000	0.000	0.000	0.000	120	485	9403	8403	-1.422	Error	Error	2556	6847	0	0	2261	6142	0	0	0	0
1	15	5	""	"YJR020W"	5090	14140	120	3539	2993	1356	111	138	227	91	90	0	3556	3009	1433	110	117	51	95	93	0	0	0	0	0	0	0	0	0	0	0	0	0	0	0	0	0	0	0	0.995	0.994	0.993	1.071	1.811	0.975	0.917	0.000	0.000	0.000	0.000	0.000	0.000	0.000	0.000	0.000	0.000	0.000	0.000	0.000	0.000	120	515	6874	5781	-0.008	Error	Error	3428	3446	0	0	2882	2899	0	0	0	0
1	16	5	"rad7"	"YJR052W"	5260	14140	110	5059	4858	1820	109	188	354	98	97	0	9433	8487	3370	114	193	395	98	96	0	0	0	0	0	0	0	0	0	0	0	0	0	0	0	0	0	0	0	0.531	0.567	0.575	0.594	1.536	0.561	0.910	0.000	0.000	0.000	0.000	0.000	0.000	0.000	0.000	0.000	0.000	0.000	0.000	0.000	0.000	80	483	14269	13122	-0.913	Error	Error	4950	9319	0	0	4749	8373	0	0	0	0
1	17	5	""	"YJR085C"	5470	14140	100	1329	1148	547	106	172	299	83	76	0	2537	2056	1061	106	202	448	80	80	0	0	0	0	0	0	0	0	0	0	0	0	0	0	0	0	0	0	0	0.503	0.534	0.540	0.542	1.679	0.530	0.880	0.000	0.000	0.000	0.000	0.000	0.000	0.000	0.000	0.000	0.000	0.000	0.000	0.000	0.000	80	437	3654	2992	-0.991	Error	Error	1223	2431	0	0	1042	1950	0	0	0	0
1	18	5	"LSM8"	"YJR022W"	5650	14140	120	1636	1392	664	103	135	258	85	78	0	1704	1398	761	102	153	396	79	69	0	0	0	0	0	0	0	0	0	0	0	0	0	0	0	0	0	0	0	0.957	0.995	1.005	1.218	2.284	0.948	0.896	0.000	0.000	0.000	0.000	0.000	0.000	0.000	0.000	0.000	0.000	0.000	0.000	0.000	0.000	120	523	3135	2585	-0.064	Error	Error	1533	1602	0	0	1289	1296	0	0	0	0
1	19	5	""	"YJR054W"	5820	14140	120	6543	5875	2368	109	120	113	98	97	0	8049	7134	3205	110	135	231	96	94	0	0	0	0	0	0	0	0	0	0	0	0	0	0	0	0	0	0	0	0.810	0.821	0.822	0.909	1.845	0.797	0.908	0.000	0.000	0.000	0.000	0.000	0.000	0.000	0.000	0.000	0.000	0.000	0.000	0.000	0.000	120	538	14373	12790	-0.303	Error	Error	6434	7939	0	0	5766	7024	0	0	0	0
1	20	5	""	"YJR087W"	6010	14150	110	1320	1170	493	112	137	134	92	91	0	2542	2178	1019	115	173	337	87	81	0	0	0	0	0	0	0	0	0	0	0	0	0	0	0	0	0	0	0	0.498	0.513	0.532	0.587	2.106	0.472	0.882	0.000	0.000	0.000	0.000	0.000	0.000	0.000	0.000	0.000	0.000	0.000	0.000	0.000	0.000	80	499	3635	3121	-1.007	Error	Error	1208	2427	0	0	1058	2063	0	0	0	0
1	21	5	"RSC4"	"YKR008W"	6210	14140	110	15236	13516	5394	114	186	404	100	98	0	8666	7375	3329	111	213	470	95	93	0	0	0	0	0	0	0	0	0	0	0	0	0	0	0	0	0	0	0	1.768	1.845	1.835	2.032	1.658	1.815	0.926	0.000	0.000	0.000	0.000	0.000	0.000	0.000	0.000	0.000	0.000	0.000	0.000	0.000	0.000	80	503	23677	20666	0.822	Error	Error	15122	8555	0	0	13402	7264	0	0	0	0
1	22	5	"gap1"	"YKR039W"	6390	14140	120	9954	9066	3165	107	149	293	98	98	0	9441	8251	3179	107	161	377	97	96	0	0	0	0	0	0	0	0	0	0	0	0	0	0	0	0	0	0	0	1.055	1.100	1.075	1.152	1.487	1.088	0.928	0.000	0.000	0.000	0.000	0.000	0.000	0.000	0.000	0.000	0.000	0.000	0.000	0.000	0.000	120	593	19181	17103	0.077	Error	Error	9847	9334	0	0	8959	8144	0	0	0	0
1	1	6	""	"YKR071C"	2410	14330	110	17836	15818	6488	86	197	764	97	96	0	7260	6255	2778	85	183	732	91	90	0	0	0	0	0	0	0	0	0	0	0	0	0	0	0	0	0	0	0	2.474	2.550	2.621	2.904	1.737	2.580	0.941	0.000	0.000	0.000	0.000	0.000	0.000	0.000	0.000	0.000	0.000	0.000	0.000	0.000	0.000	80	520	24925	21902	1.307	Error	Error	17750	7175	0	0	15732	6170	0	0	0	0
1	2	6	"TOF2"	"YKR010C"	2590	14330	120	18689	17731	7220	99	220	772	99	98	0	7593	7170	2966	94	270	1134	93	90	0	0	0	0	0	0	0	0	0	0	0	0	0	0	0	0	0	0	0	2.479	2.492	2.542	2.619	1.554	2.566	0.927	0.000	0.000	0.000	0.000	0.000	0.000	0.000	0.000	0.000	0.000	0.000	0.000	0.000	0.000	120	590	26089	24708	1.310	Error	Error	18590	7499	0	0	17632	7076	0	0	0	0
1	3	6	""	"YKR041W"	2820	14320	110	1333	1173	445	97	102	44	98	98	0	4650	3941	1764	99	116	119	100	96	0	0	0	0	0	0	0	0	0	0	0	0	0	0	0	0	0	0	0	0.272	0.280	0.285	0.296	1.638	0.252	0.880	0.000	0.000	0.000	0.000	0.000	0.000	0.000	0.000	0.000	0.000	0.000	0.000	0.000	0.000	80	456	5787	4918	-1.881	Error	Error	1236	4551	0	0	1076	3842	0	0	0	0
1	4	6	""	"YKR073C"	2990	14320	150	121	170	128	95	104	70	31	21	0	152	226	205	103	128	200	19	12	0	0	0	0	0	0	0	0	0	0	0	0	0	0	0	0	0	0	0	0.531	0.610	0.683	0.774	3.233	0.399	0.435	0.000	0.000	0.000	0.000	0.000	0.000	0.000	0.000	0.000	0.000	0.000	0.000	0.000	0.000	156	556	75	198	-0.914	Error	Error	26	49	0	0	75	123	0	0	-50	0
1	5	6	""	"YKR012C"	3160	14330	120	3814	3165	1548	99	124	117	97	95	0	3961	3206	1764	103	119	79	91	91	0	0	0	0	0	0	0	0	0	0	0	0	0	0	0	0	0	0	0	0.963	0.988	0.959	1.159	2.185	0.932	0.918	0.000	0.000	0.000	0.000	0.000	0.000	0.000	0.000	0.000	0.000	0.000	0.000	0.000	0.000	120	480	7573	6169	-0.054	Error	Error	3715	3858	0	0	3066	3103	0	0	0	0
1	6	6	""	"YKR043C"	3350	14330	110	20689	17957	6856	120	343	1428	97	96	0	7803	6641	2999	108	245	821	93	91	0	0	0	0	0	0	0	0	0	0	0	0	0	0	0	0	0	0	0	2.673	2.730	2.694	2.972	1.608	2.675	0.927	0.000	0.000	0.000	0.000	0.000	0.000	0.000	0.000	0.000	0.000	0.000	0.000	0.000	0.000	80	476	28264	24370	1.418	Error	Error	20569	7695	0	0	17837	6533	0	0	0	0
1	7	6	""	"YKR075C"	3550	14330	110	6137	5319	2283	126	356	1402	88	80	0	7260	5878	3016	112	304	939	90	81	0	0	0	0	0	0	0	0	0	0	0	0	0	0	0	0	0	0	0	0.841	0.901	0.883	0.998	1.711	0.839	0.915	0.000	0.000	0.000	0.000	0.000	0.000	0.000	0.000	0.000	0.000	0.000	0.000	0.000	0.000	80	508	13159	10959	-0.250	Error	Error	6011	7148	0	0	5193	5766	0	0	0	0
1	8	6	"YPT52"	"YKR014C"	3740	14330	110	5257	4567	1870	120	223	485	95	90	0	5711	4882	2260	113	300	840	88	82	0	0	0	0	0	0	0	0	0	0	0	0	0	0	0	0	0	0	0	0.918	0.932	0.937	1.016	1.544	0.913	0.929	0.000	0.000	0.000	0.000	0.000	0.000	0.000	0.000	0.000	0.000	0.000	0.000	0.000	0.000	80	465	10735	9216	-0.124	Error	Error	5137	5598	0	0	4447	4769	0	0	0	0
1	9	6	""	"YKR045C"	3920	14330	120	10305	8814	3719	128	189	391	98	95	0	6575	5584	2633	118	224	637	89	83	0	0	0	0	0	0	0	0	0	0	0	0	0	0	0	0	0	0	0	1.576	1.589	1.596	1.770	1.693	1.560	0.912	0.000	0.000	0.000	0.000	0.000	0.000	0.000	0.000	0.000	0.000	0.000	0.000	0.000	0.000	120	496	16634	14152	0.656	Error	Error	10177	6457	0	0	8686	5466	0	0	0	0
1	10	6	""	"YKR077W"	4110	14330	120	6273	5902	2757	130	138	78	100	99	0	11125	10126	4948	121	142	176	99	99	0	0	0	0	0	0	0	0	0	0	0	0	0	0	0	0	0	0	0	0.558	0.577	0.582	0.618	1.819	0.565	0.917	0.000	0.000	0.000	0.000	0.000	0.000	0.000	0.000	0.000	0.000	0.000	0.000	0.000	0.000	120	537	17147	15777	-0.841	Error	Error	6143	11004	0	0	5772	10005	0	0	0	0
1	11	6	"FRE1"	"YLR214W"	4320	14330	120	7190	6740	2700	116	149	388	97	97	0	5711	4971	2151	118	178	713	93	87	0	0	0	0	0	0	0	0	0	0	0	0	0	0	0	0	0	0	0	1.265	1.365	1.401	1.475	1.583	1.380	0.905	0.000	0.000	0.000	0.000	0.000	0.000	0.000	0.000	0.000	0.000	0.000	0.000	0.000	0.000	120	513	12667	11477	0.339	Error	Error	7074	5593	0	0	6624	4853	0	0	0	0
1	12	6	"MAP1"	"YLR244C"	4490	14330	120	7690	6806	2758	111	128	155	99	99	0	5751	5054	2088	111	140	322	95	95	0	0	0	0	0	0	0	0	0	0	0	0	0	0	0	0	0	0	0	1.344	1.354	1.374	1.405	1.387	1.355	0.929	0.000	0.000	0.000	0.000	0.000	0.000	0.000	0.000	0.000	0.000	0.000	0.000	0.000	0.000	120	532	13219	11638	0.426	Error	Error	7579	5640	0	0	6695	4943	0	0	0	0
1	13	6	"CDC46"	"YLR274W"	4680	14340	110	4642	4994	3385	109	147	294	98	96	0	5161	5423	3964	110	181	507	91	87	0	0	0	0	0	0	0	0	0	0	0	0	0	0	0	0	0	0	0	0.897	0.919	0.931	1.072	1.884	0.878	0.884	0.000	0.000	0.000	0.000	0.000	0.000	0.000	0.000	0.000	0.000	0.000	0.000	0.000	0.000	80	513	9584	10198	-0.156	Error	Error	4533	5051	0	0	4885	5313	0	0	0	0
1	14	6	"CPR6"	"YLR216C"	4880	14330	120	3956	3445	1422	108	153	302	97	94	0	7650	6665	2880	110	188	507	97	94	0	0	0	0	0	0	0	0	0	0	0	0	0	0	0	0	0	0	0	0.510	0.509	0.507	0.530	1.629	0.497	0.928	0.000	0.000	0.000	0.000	0.000	0.000	0.000	0.000	0.000	0.000	0.000	0.000	0.000	0.000	120	522	11388	9892	-0.970	Error	Error	3848	7540	0	0	3337	6555	0	0	0	0
1	15	6	"ERF2"	"YLR246W"	5060	14330	120	2710	2543	1149	104	110	47	100	98	0	2140	1938	949	108	119	131	94	89	0	0	0	0	0	0	0	0	0	0	0	0	0	0	0	0	0	0	0	1.282	1.333	1.321	1.469	1.715	1.340	0.876	0.000	0.000	0.000	0.000	0.000	0.000	0.000	0.000	0.000	0.000	0.000	0.000	0.000	0.000	120	490	4638	4269	0.359	Error	Error	2606	2032	0	0	2439	1830	0	0	0	0
1	16	6	"DBP9"	"YLR276C"	5250	14330	120	14716	14951	8172	102	135	255	100	98	0	5484	4910	2666	108	135	207	94	92	0	0	0	0	0	0	0	0	0	0	0	0	0	0	0	0	0	0	0	2.718	3.092	3.041	3.248	1.692	3.210	0.922	0.000	0.000	0.000	0.000	0.000	0.000	0.000	0.000	0.000	0.000	0.000	0.000	0.000	0.000	120	551	19990	19651	1.443	Error	Error	14614	5376	0	0	14849	4802	0	0	0	0
1	17	6	""	"YLR218C"	5450	14320	110	2175	1896	828	104	153	252	90	87	0	4920	4069	1987	102	157	346	91	90	0	0	0	0	0	0	0	0	0	0	0	0	0	0	0	0	0	0	0	0.430	0.452	0.451	0.504	1.826	0.434	0.889	0.000	0.000	0.000	0.000	0.000	0.000	0.000	0.000	0.000	0.000	0.000	0.000	0.000	0.000	80	543	6889	5759	-1.218	Error	Error	2071	4818	0	0	1792	3967	0	0	0	0
1	18	6	"RCK2"	"YLR248W"	5660	14330	110	2258	1964	1132	110	148	189	87	81	0	9479	8126	5110	109	153	300	92	88	0	0	0	0	0	0	0	0	0	0	0	0	0	0	0	0	0	0	0	0.229	0.231	0.233	0.267	1.955	0.217	0.918	0.000	0.000	0.000	0.000	0.000	0.000	0.000	0.000	0.000	0.000	0.000	0.000	0.000	0.000	80	504	11518	9871	-2.125	Error	Error	2148	9370	0	0	1854	8017	0	0	0	0
1	19	6	""	"YLR278C"	5830	14330	100	511	545	266	118	149	383	55	12	0	881	913	500	116	135	142	92	85	0	0	0	0	0	0	0	0	0	0	0	0	0	0	0	0	0	0	0	0.514	0.536	0.521	0.524	1.517	0.505	0.803	0.000	0.000	0.000	0.000	0.000	0.000	0.000	0.000	0.000	0.000	0.000	0.000	0.000	0.000	80	430	1158	1224	-0.961	Error	Error	393	765	0	0	427	797	0	0	0	0
1	20	6	"CCC1"	"YLR220W"	6020	14320	110	16041	13358	7187	118	198	587	100	95	0	5141	4198	2438	114	155	264	91	83	0	0	0	0	0	0	0	0	0	0	0	0	0	0	0	0	0	0	0	3.167	3.242	3.241	3.629	1.752	3.230	0.915	0.000	0.000	0.000	0.000	0.000	0.000	0.000	0.000	0.000	0.000	0.000	0.000	0.000	0.000	80	510	20950	17324	1.663	Error	Error	15923	5027	0	0	13240	4084	0	0	0	0
1	21	6	"SSP120"	"YLR250W"	6220	14330	120	5180	4772	1919	109	160	397	99	97	0	4068	3595	1558	108	151	264	95	94	0	0	0	0	0	0	0	0	0	0	0	0	0	0	0	0	0	0	0	1.281	1.337	1.323	1.420	1.527	1.336	0.904	0.000	0.000	0.000	0.000	0.000	0.000	0.000	0.000	0.000	0.000	0.000	0.000	0.000	0.000	120	545	9031	8150	0.357	Error	Error	5071	3960	0	0	4663	3487	0	0	0	0
1	22	6	""	"YLR280C"	6390	14330	110	460	463	232	103	113	94	90	80	0	444	458	247	105	114	50	87	85	0	0	0	0	0	0	0	0	0	0	0	0	0	0	0	0	0	0	0	1.053	1.020	1.013	0.983	1.486	1.002	0.763	0.000	0.000	0.000	0.000	0.000	0.000	0.000	0.000	0.000	0.000	0.000	0.000	0.000	0.000	80	510	696	713	0.075	Error	Error	357	339	0	0	360	353	0	0	0	0
1	1	7	"CTK3"	"YML112W"	2430	14520	110	3830	3200	1961	84	200	600	81	72	0	10435	8638	5666	88	450	1840	77	71	0	0	0	0	0	0	0	0	0	0	0	0	0	0	0	0	0	0	0	0.362	0.364	0.370	0.488	2.638	0.340	0.907	0.000	0.000	0.000	0.000	0.000	0.000	0.000	0.000	0.000	0.000	0.000	0.000	0.000	0.000	80	556	14093	11666	-1.466	Error	Error	3746	10347	0	0	3116	8550	0	0	0	0
1	2	7	""	"YMR010W"	2630	14520	120	5910	5265	2467	96	206	574	94	90	0	8017	6869	3788	98	472	1861	83	74	0	0	0	0	0	0	0	0	0	0	0	0	0	0	0	0	0	0	0	0.734	0.763	0.751	0.932	2.217	0.707	0.875	0.000	0.000	0.000	0.000	0.000	0.000	0.000	0.000	0.000	0.000	0.000	0.000	0.000	0.000	120	540	13733	11940	-0.446	Error	Error	5814	7919	0	0	5169	6771	0	0	0	0
1	3	7	""	"YMR041C"	2820	14520	120	3837	3379	1962	97	118	201	94	87	0	7826	6421	4243	105	130	139	90	88	0	0	0	0	0	0	0	0	0	0	0	0	0	0	0	0	0	0	0	0.484	0.520	0.514	0.692	2.550	0.480	0.894	0.000	0.000	0.000	0.000	0.000	0.000	0.000	0.000	0.000	0.000	0.000	0.000	0.000	0.000	120	546	11461	9598	-1.046	Error	Error	3740	7721	0	0	3282	6316	0	0	0	0
1	4	7	""	"YML114C"	3000	14510	110	4414	3921	1555	100	139	244	98	97	0	12076	10534	4611	111	178	389	98	96	0	0	0	0	0	0	0	0	0	0	0	0	0	0	0	0	0	0	0	0.361	0.367	0.362	0.394	1.557	0.351	0.924	0.000	0.000	0.000	0.000	0.000	0.000	0.000	0.000	0.000	0.000	0.000	0.000	0.000	0.000	80	480	16279	14244	-1.472	Error	Error	4314	11965	0	0	3821	10423	0	0	0	0
1	5	7	"CLU1"	"YMR012W"	3210	14520	110	448	431	185	104	136	147	78	58	0	517	501	285	107	169	389	52	10	0	0	0	0	0	0	0	0	0	0	0	0	0	0	0	0	0	0	0	0.839	0.830	0.756	0.894	2.338	0.713	0.683	0.000	0.000	0.000	0.000	0.000	0.000	0.000	0.000	0.000	0.000	0.000	0.000	0.000	0.000	80	440	754	721	-0.253	Error	Error	344	410	0	0	327	394	0	0	0	0
1	6	7	"mcm1"	"YMR043W"	3370	14510	150	112	131	77	120	292	1199	0	0	0	112	136	88	107	243	850	0	0	0	0	0	0	0	0	0	0	0	0	0	0	0	0	0	0	0	0	0	-1.600	0.379	1.114	1.188	3.733	1.958	0.891	0.000	0.000	0.000	0.000	0.000	0.000	0.000	0.000	0.000	0.000	0.000	0.000	0.000	0.000	156	692	-3	40	Error	Error	Error	-8	5	0	0	11	29	0	0	-50	0
1	7	7	"atr1"	"YML116W"	3580	14520	120	17839	15467	7661	119	214	706	97	96	0	7271	6141	3516	110	191	545	87	80	0	0	0	0	0	0	0	0	0	0	0	0	0	0	0	0	0	0	0	2.475	2.545	2.522	3.004	2.092	2.526	0.906	0.000	0.000	0.000	0.000	0.000	0.000	0.000	0.000	0.000	0.000	0.000	0.000	0.000	0.000	120	573	24881	21379	1.307	Error	Error	17720	7161	0	0	15348	6031	0	0	0	0
1	8	7	""	"YMR014W"	3770	14520	120	12941	12655	7674	118	157	267	99	99	0	4374	4072	2608	107	149	361	87	82	0	0	0	0	0	0	0	0	0	0	0	0	0	0	0	0	0	0	0	3.005	3.162	3.109	3.592	1.930	3.269	0.889	0.000	0.000	0.000	0.000	0.000	0.000	0.000	0.000	0.000	0.000	0.000	0.000	0.000	0.000	120	518	17090	16502	1.587	Error	Error	12823	4267	0	0	12537	3965	0	0	0	0
1	9	7	""	"YMR045C"	3950	14520	120	16550	16926	9084	122	134	68	99	99	0	10108	10407	6239	108	119	50	98	98	0	0	0	0	0	0	0	0	0	0	0	0	0	0	0	0	0	0	0	1.643	1.632	1.649	1.799	1.719	1.617	0.887	0.000	0.000	0.000	0.000	0.000	0.000	0.000	0.000	0.000	0.000	0.000	0.000	0.000	0.000	120	507	26428	27103	0.716	Error	Error	16428	10000	0	0	16804	10299	0	0	0	0
1	10	7	""	"YML117W-A"	4130	14520	110	6565	5842	1862	134	170	155	100	100	0	4508	4058	1385	120	177	285	100	98	0	0	0	0	0	0	0	0	0	0	0	0	0	0	0	0	0	0	0	1.466	1.449	1.451	1.484	1.370	1.441	0.916	0.000	0.000	0.000	0.000	0.000	0.000	0.000	0.000	0.000	0.000	0.000	0.000	0.000	0.000	80	480	10819	9646	0.551	Error	Error	6431	4388	0	0	5708	3938	0	0	0	0
1	11	7	"SOK2"	"YMR016C"	4320	14520	110	12940	11898	5049	131	362	1212	97	91	0	12642	11798	5338	127	460	1611	92	91	0	0	0	0	0	0	0	0	0	0	0	0	0	0	0	0	0	0	0	1.023	1.008	0.981	1.026	1.504	0.971	0.887	0.000	0.000	0.000	0.000	0.000	0.000	0.000	0.000	0.000	0.000	0.000	0.000	0.000	0.000	80	504	25324	23438	0.033	Error	Error	12809	12515	0	0	11767	11671	0	0	0	0
1	12	7	""	"YMR046W-A"	4520	14520	110	18346	14831	6259	134	605	2267	92	86	0	9856	8280	3633	128	609	2009	88	82	0	0	0	0	0	0	0	0	0	0	0	0	0	0	0	0	0	0	0	1.872	1.803	1.789	1.887	1.513	1.807	0.927	0.000	0.000	0.000	0.000	0.000	0.000	0.000	0.000	0.000	0.000	0.000	0.000	0.000	0.000	80	549	27940	22849	0.905	Error	Error	18212	9728	0	0	14697	8152	0	0	0	0
1	13	7	"PUB1"	"YNL016W"	4740	14530	110	961	940	466	121	395	1877	2	0	0	876	836	496	116	330	1229	13	0	0	0	0	0	0	0	0	0	0	0	0	0	0	0	0	0	0	0	0	1.105	1.138	1.105	1.218	1.881	1.060	0.836	0.000	0.000	0.000	0.000	0.000	0.000	0.000	0.000	0.000	0.000	0.000	0.000	0.000	0.000	80	504	1600	1539	0.144	Error	Error	840	760	0	0	819	720	0	0	0	0
1	14	7	"ALG11"	"YNL048W"	4920	14520	120	13249	12077	5491	113	140	133	99	99	0	9006	8433	4128	107	140	133	99	97	0	0	0	0	0	0	0	0	0	0	0	0	0	0	0	0	0	0	0	1.476	1.437	1.427	1.563	1.659	1.434	0.905	0.000	0.000	0.000	0.000	0.000	0.000	0.000	0.000	0.000	0.000	0.000	0.000	0.000	0.000	120	488	22035	20290	0.562	Error	Error	13136	8899	0	0	11964	8326	0	0	0	0
1	15	7	"TPM1"	"YNL079C"	5090	14520	110	3009	2710	1071	108	136	174	98	95	0	7750	6615	2853	105	209	668	93	91	0	0	0	0	0	0	0	0	0	0	0	0	0	0	0	0	0	0	0	0.379	0.400	0.411	0.416	1.396	0.379	0.924	0.000	0.000	0.000	0.000	0.000	0.000	0.000	0.000	0.000	0.000	0.000	0.000	0.000	0.000	80	432	10546	9112	-1.398	Error	Error	2901	7645	0	0	2602	6510	0	0	0	0
1	16	7	""	"YNL018C"	5280	14520	120	12733	11805	5322	106	134	152	99	99	0	14520	13777	7523	109	204	600	95	94	0	0	0	0	0	0	0	0	0	0	0	0	0	0	0	0	0	0	0	0.876	0.856	0.842	0.968	1.835	0.804	0.916	0.000	0.000	0.000	0.000	0.000	0.000	0.000	0.000	0.000	0.000	0.000	0.000	0.000	0.000	120	543	27038	25367	-0.191	Error	Error	12627	14411	0	0	11699	13668	0	0	0	0
1	17	7	""	"YNL050C"	5470	14520	110	14868	12937	5587	128	246	587	100	98	0	4770	4102	1910	117	183	317	96	93	0	0	0	0	0	0	0	0	0	0	0	0	0	0	0	0	0	0	0	3.168	3.214	3.235	3.388	1.550	3.256	0.934	0.000	0.000	0.000	0.000	0.000	0.000	0.000	0.000	0.000	0.000	0.000	0.000	0.000	0.000	80	514	19393	16794	1.664	Error	Error	14740	4653	0	0	12809	3985	0	0	0	0
1	18	7	""	"YNL081C"	5670	14520	110	13225	11440	4196	164	424	1252	93	93	0	2226	2006	778	131	224	411	91	86	0	0	0	0	0	0	0	0	0	0	0	0	0	0	0	0	0	0	0	6.234	6.014	6.085	6.139	1.467	6.134	0.874	0.000	0.000	0.000	0.000	0.000	0.000	0.000	0.000	0.000	0.000	0.000	0.000	0.000	0.000	80	528	15156	13151	2.640	Error	Error	13061	2095	0	0	11276	1875	0	0	0	0
1	19	7	"ARK1"	"YNL020C"	5880	14520	120	6954	6191	3158	138	315	1156	84	81	0	5935	5159	2929	123	188	372	85	83	0	0	0	0	0	0	0	0	0	0	0	0	0	0	0	0	0	0	0	1.173	1.202	1.218	1.403	1.903	1.160	0.904	0.000	0.000	0.000	0.000	0.000	0.000	0.000	0.000	0.000	0.000	0.000	0.000	0.000	0.000	120	572	12628	11089	0.230	Error	Error	6816	5812	0	0	6053	5036	0	0	0	0
1	20	7	"COX5A"	"YNL052W"	6040	14520	110	2962	2715	1294	119	167	441	88	86	0	3126	2592	1395	114	174	501	81	77	0	0	0	0	0	0	0	0	0	0	0	0	0	0	0	0	0	0	0	0.944	1.048	1.012	1.138	2.011	1.018	0.878	0.000	0.000	0.000	0.000	0.000	0.000	0.000	0.000	0.000	0.000	0.000	0.000	0.000	0.000	80	473	5855	5074	-0.083	Error	Error	2843	3012	0	0	2596	2478	0	0	0	0
1	21	7	""	"YNL083W"	6240	14520	120	5744	5249	3105	110	136	152	98	95	0	8661	7793	4744	112	181	513	92	85	0	0	0	0	0	0	0	0	0	0	0	0	0	0	0	0	0	0	0	0.659	0.669	0.670	0.735	1.912	0.642	0.888	0.000	0.000	0.000	0.000	0.000	0.000	0.000	0.000	0.000	0.000	0.000	0.000	0.000	0.000	120	577	14183	12820	-0.602	Error	Error	5634	8549	0	0	5139	7681	0	0	0	0
1	22	7	""	"YNL022C"	6430	14530	110	5040	4353	1871	105	125	118	100	100	0	10711	9151	4588	112	141	238	98	98	0	0	0	0	0	0	0	0	0	0	0	0	0	0	0	0	0	0	0	0.466	0.470	0.463	0.513	1.721	0.449	0.909	0.000	0.000	0.000	0.000	0.000	0.000	0.000	0.000	0.000	0.000	0.000	0.000	0.000	0.000	80	519	15534	13287	-1.103	Error	Error	4935	10599	0	0	4248	9039	0	0	0	0
1	1	8	"VAC7"	"YNL054W"	2430	14710	110	1434	1564	999	81	91	70	97	96	0	2281	2446	1667	85	111	233	93	86	0	0	0	0	0	0	0	0	0	0	0	0	0	0	0	0	0	0	0	0.616	0.628	0.624	0.662	1.763	0.554	0.804	0.000	0.000	0.000	0.000	0.000	0.000	0.000	0.000	0.000	0.000	0.000	0.000	0.000	0.000	80	551	3549	3844	-0.699	Error	Error	1353	2196	0	0	1483	2361	0	0	0	0
1	2	8	"mkt1"	"YNL085W"	2630	14710	120	5526	5553	3863	95	149	535	95	93	0	4875	5167	3592	96	146	544	87	82	0	0	0	0	0	0	0	0	0	0	0	0	0	0	0	0	0	0	0	1.136	1.076	1.100	1.282	2.146	1.072	0.876	0.000	0.000	0.000	0.000	0.000	0.000	0.000	0.000	0.000	0.000	0.000	0.000	0.000	0.000	120	581	10210	10529	0.185	Error	Error	5431	4779	0	0	5458	5071	0	0	0	0
1	3	8	"BIO4"	"YNR057C"	2840	14700	110	6523	5926	3080	97	163	593	93	91	0	11525	9654	5254	109	161	600	92	85	0	0	0	0	0	0	0	0	0	0	0	0	0	0	0	0	0	0	0	0.563	0.611	0.624	0.698	2.022	0.596	0.918	0.000	0.000	0.000	0.000	0.000	0.000	0.000	0.000	0.000	0.000	0.000	0.000	0.000	0.000	80	474	17842	15374	-0.829	Error	Error	6426	11416	0	0	5829	9545	0	0	0	0
1	4	8	"HTA3"	"YOL012C"	3010	14710	120	2374	2113	810	106	158	268	97	93	0	5848	5066	2334	112	160	330	94	90	0	0	0	0	0	0	0	0	0	0	0	0	0	0	0	0	0	0	0	0.395	0.405	0.405	0.459	1.863	0.360	0.857	0.000	0.000	0.000	0.000	0.000	0.000	0.000	0.000	0.000	0.000	0.000	0.000	0.000	0.000	120	558	8004	6961	-1.339	Error	Error	2268	5736	0	0	2007	4954	0	0	0	0
1	5	8	"NTG2"	"YOL043C"	3220	14710	120	20662	17365	8683	121	161	173	100	100	0	6141	5180	2880	113	131	89	95	95	0	0	0	0	0	0	0	0	0	0	0	0	0	0	0	0	0	0	0	3.408	3.403	3.313	3.864	2.013	3.449	0.887	0.000	0.000	0.000	0.000	0.000	0.000	0.000	0.000	0.000	0.000	0.000	0.000	0.000	0.000	120	511	26569	22311	1.769	Error	Error	20541	6028	0	0	17244	5067	0	0	0	0
1	6	8	""	"YNR059W"	3380	14720	110	4686	4100	2146	118	153	242	100	91	0	6753	5962	3703	107	193	682	86	81	0	0	0	0	0	0	0	0	0	0	0	0	0	0	0	0	0	0	0	0.687	0.680	0.683	0.855	2.461	0.616	0.857	0.000	0.000	0.000	0.000	0.000	0.000	0.000	0.000	0.000	0.000	0.000	0.000	0.000	0.000	80	418	11214	9837	-0.541	Error	Error	4568	6646	0	0	3982	5855	0	0	0	0
1	7	8	""	"YOL013W-A"	3560	14720	110	11611	9487	4769	114	241	837	91	86	0	5819	4540	2668	107	261	860	80	76	0	0	0	0	0	0	0	0	0	0	0	0	0	0	0	0	0	0	0	2.013	2.114	2.109	2.359	1.908	2.031	0.903	0.000	0.000	0.000	0.000	0.000	0.000	0.000	0.000	0.000	0.000	0.000	0.000	0.000	0.000	80	482	17209	13806	1.009	Error	Error	11497	5712	0	0	9373	4433	0	0	0	0
1	8	8	""	"YOL045W"	3750	14710	110	975	890	428	107	208	788	56	3	0	906	921	503	106	193	573	63	23	0	0	0	0	0	0	0	0	0	0	0	0	0	0	0	0	0	0	0	1.085	0.961	0.966	1.055	1.813	0.953	0.804	0.000	0.000	0.000	0.000	0.000	0.000	0.000	0.000	0.000	0.000	0.000	0.000	0.000	0.000	80	513	1668	1598	0.118	Error	Error	868	800	0	0	783	815	0	0	0	0
1	9	8	""	"YNR061C"	3960	14710	110	6420	5443	2473	102	126	142	98	98	0	12266	10180	5459	109	134	221	96	91	0	0	0	0	0	0	0	0	0	0	0	0	0	0	0	0	0	0	0	0.520	0.530	0.530	0.647	2.290	0.504	0.899	0.000	0.000	0.000	0.000	0.000	0.000	0.000	0.000	0.000	0.000	0.000	0.000	0.000	0.000	80	519	18475	15412	-0.944	Error	Error	6318	12157	0	0	5341	10071	0	0	0	0
1	10	8	""	"YOL015W"	4140	14710	110	11851	11093	5846	109	137	132	100	100	0	6860	6153	3449	115	131	71	92	91	0	0	0	0	0	0	0	0	0	0	0	0	0	0	0	0	0	0	0	1.741	1.819	1.772	2.095	2.302	1.852	0.910	0.000	0.000	0.000	0.000	0.000	0.000	0.000	0.000	0.000	0.000	0.000	0.000	0.000	0.000	80	495	18487	17022	0.800	Error	Error	11742	6745	0	0	10984	6038	0	0	0	0
1	11	8	""	"YOL047C"	4340	14710	120	3203	3034	1336	117	206	714	90	82	0	5758	5097	2380	114	213	815	90	85	0	0	0	0	0	0	0	0	0	0	0	0	0	0	0	0	0	0	0	0.547	0.585	0.580	0.648	1.942	0.574	0.906	0.000	0.000	0.000	0.000	0.000	0.000	0.000	0.000	0.000	0.000	0.000	0.000	0.000	0.000	120	572	8730	7900	-0.871	Error	Error	3086	5644	0	0	2917	4983	0	0	0	0
1	12	8	""	"YNR063W"	4510	14710	110	15235	14397	3698	117	226	884	100	100	0	13508	12580	3967	119	229	766	98	97	0	0	0	0	0	0	0	0	0	0	0	0	0	0	0	0	0	0	0	1.129	1.146	1.155	1.206	1.473	1.121	0.928	0.000	0.000	0.000	0.000	0.000	0.000	0.000	0.000	0.000	0.000	0.000	0.000	0.000	0.000	80	478	28507	26741	0.175	Error	Error	15118	13389	0	0	14280	12461	0	0	0	0
1	13	8	""	"YOL017W"	4710	14710	120	10190	9671	3854	121	175	373	99	98	0	7334	7108	3195	122	199	605	95	90	0	0	0	0	0	0	0	0	0	0	0	0	0	0	0	0	0	0	0	1.396	1.367	1.383	1.502	1.682	1.362	0.897	0.000	0.000	0.000	0.000	0.000	0.000	0.000	0.000	0.000	0.000	0.000	0.000	0.000	0.000	120	542	17281	16536	0.481	Error	Error	10069	7212	0	0	9550	6986	0	0	0	0
1	14	8	"GSH2"	"YOL049W"	4900	14710	120	2826	3243	2636	112	123	75	98	98	0	2284	2643	2118	110	125	59	93	91	0	0	0	0	0	0	0	0	0	0	0	0	0	0	0	0	0	0	0	1.248	1.236	1.217	1.423	2.195	1.259	0.869	0.000	0.000	0.000	0.000	0.000	0.000	0.000	0.000	0.000	0.000	0.000	0.000	0.000	0.000	120	512	4888	5664	0.320	Error	Error	2714	2174	0	0	3131	2533	0	0	0	0
1	15	8	"RIS1"	"YOR191W"	5100	14710	120	312	342	149	102	111	82	89	68	0	441	589	1574	105	125	212	77	32	0	0	0	0	0	0	0	0	0	0	0	0	0	0	0	0	0	0	0	0.625	0.496	0.711	0.706	1.972	0.030	0.032	0.000	0.000	0.000	0.000	0.000	0.000	0.000	0.000	0.000	0.000	0.000	0.000	0.000	0.000	120	536	546	724	-0.678	Error	Error	210	336	0	0	240	484	0	0	0	0
1	16	8	"MCT1"	"YOR221C"	5290	14710	120	6073	5286	2164	104	110	49	100	100	0	12266	10614	4750	108	121	50	100	100	0	0	0	0	0	0	0	0	0	0	0	0	0	0	0	0	0	0	0	0.491	0.493	0.490	0.533	1.603	0.472	0.907	0.000	0.000	0.000	0.000	0.000	0.000	0.000	0.000	0.000	0.000	0.000	0.000	0.000	0.000	120	491	18127	15688	-1.026	Error	Error	5969	12158	0	0	5182	10506	0	0	0	0
1	17	8	""	"YOR253W"	5480	14710	120	2813	2368	1321	128	173	314	89	80	0	3043	2526	1508	129	156	164	90	84	0	0	0	0	0	0	0	0	0	0	0	0	0	0	0	0	0	0	0	0.921	0.935	0.941	1.025	2.039	0.899	0.892	0.000	0.000	0.000	0.000	0.000	0.000	0.000	0.000	0.000	0.000	0.000	0.000	0.000	0.000	120	477	5599	4637	-0.118	Error	Error	2685	2914	0	0	2240	2397	0	0	0	0
1	18	8	""	"YOR192C-A"	5670	14710	120	38591	34493	11498	158	271	875	99	98	0	41825	38464	13768	149	180	167	100	98	0	0	0	0	0	0	0	0	0	0	0	0	0	0	0	0	0	0	0	0.922	0.896	0.905	0.956	1.554	0.890	0.930	0.000	0.000	0.000	0.000	0.000	0.000	0.000	0.000	0.000	0.000	0.000	0.000	0.000	0.000	120	468	80109	72650	-0.117	Error	Error	38433	41676	0	0	34335	38315	0	0	0	0
1	19	8	""	"YOR223W"	5840	14710	110	5922	5328	2891	150	175	135	100	97	0	10497	8921	4982	152	228	512	96	87	0	0	0	0	0	0	0	0	0	0	0	0	0	0	0	0	0	0	0	0.558	0.590	0.579	0.631	1.910	0.566	0.910	0.000	0.000	0.000	0.000	0.000	0.000	0.000	0.000	0.000	0.000	0.000	0.000	0.000	0.000	80	410	16117	13947	-0.842	Error	Error	5772	10345	0	0	5178	8769	0	0	0	0
1	20	8	""	"YOR255W"	6020	14710	110	6754	5644	3223	123	146	128	97	93	0	9077	7516	4601	123	230	630	88	82	0	0	0	0	0	0	0	0	0	0	0	0	0	0	0	0	0	0	0	0.741	0.747	0.737	0.818	2.025	0.721	0.885	0.000	0.000	0.000	0.000	0.000	0.000	0.000	0.000	0.000	0.000	0.000	0.000	0.000	0.000	80	456	15585	12914	-0.433	Error	Error	6631	8954	0	0	5521	7393	0	0	0	0
1	21	8	""	"YOR193W"	6200	14710	110	2222	2083	616	108	151	229	98	98	0	4208	4006	1470	115	274	814	96	90	0	0	0	0	0	0	0	0	0	0	0	0	0	0	0	0	0	0	0	0.516	0.508	0.501	0.533	1.487	0.472	0.903	0.000	0.000	0.000	0.000	0.000	0.000	0.000	0.000	0.000	0.000	0.000	0.000	0.000	0.000	80	464	6207	5866	-0.953	Error	Error	2114	4093	0	0	1975	3891	0	0	0	0
1	22	8	""	"YOR225W"	6410	14710	120	617	613	208	99	134	199	89	76	0	1697	1528	544	110	191	492	90	82	0	0	0	0	0	0	0	0	0	0	0	0	0	0	0	0	0	0	0	0.326	0.362	0.363	0.371	1.540	0.342	0.853	0.000	0.000	0.000	0.000	0.000	0.000	0.000	0.000	0.000	0.000	0.000	0.000	0.000	0.000	120	587	2105	1932	-1.615	Error	Error	518	1587	0	0	514	1418	0	0	0	0
1	1	9	"cdc31"	"YOR257W"	2410	14900	110	3072	2601	1478	80	95	104	98	96	0	6582	5589	3450	84	155	519	88	81	0	0	0	0	0	0	0	0	0	0	0	0	0	0	0	0	0	0	0	0.460	0.458	0.465	0.528	1.841	0.434	0.909	0.000	0.000	0.000	0.000	0.000	0.000	0.000	0.000	0.000	0.000	0.000	0.000	0.000	0.000	80	458	9490	8026	-1.119	Error	Error	2992	6498	0	0	2521	5505	0	0	0	0
1	2	9	"SLK19"	"YOR195W"	2600	14900	120	6238	5733	2211	85	100	102	99	99	0	6189	5773	2594	89	166	516	92	91	0	0	0	0	0	0	0	0	0	0	0	0	0	0	0	0	0	0	0	1.009	0.994	1.010	1.119	1.716	0.953	0.893	0.000	0.000	0.000	0.000	0.000	0.000	0.000	0.000	0.000	0.000	0.000	0.000	0.000	0.000	120	468	12253	11332	0.012	Error	Error	6153	6100	0	0	5648	5684	0	0	0	0
1	3	9	""	"YOR227W"	2790	14910	120	950	944	479	88	148	594	71	19	0	1154	1178	677	98	150	605	80	38	0	0	0	0	0	0	0	0	0	0	0	0	0	0	0	0	0	0	0	0.816	0.793	0.798	0.948	2.458	0.747	0.834	0.000	0.000	0.000	0.000	0.000	0.000	0.000	0.000	0.000	0.000	0.000	0.000	0.000	0.000	120	470	1918	1936	-0.293	Error	Error	862	1056	0	0	856	1080	0	0	0	0
1	4	9	"RPT4"	"YOR259C"	2980	14900	120	2272	2096	960	96	118	135	97	96	0	5031	4592	2404	104	158	343	92	90	0	0	0	0	0	0	0	0	0	0	0	0	0	0	0	0	0	0	0	0.442	0.446	0.446	0.497	1.634	0.417	0.920	0.000	0.000	0.000	0.000	0.000	0.000	0.000	0.000	0.000	0.000	0.000	0.000	0.000	0.000	120	474	7103	6488	-1.179	Error	Error	2176	4927	0	0	2000	4488	0	0	0	0
1	5	9	"NIP100"	"YPL174C"	3190	14900	120	11033	10227	5024	104	136	153	100	99	0	7751	7495	3960	105	157	330	95	95	0	0	0	0	0	0	0	0	0	0	0	0	0	0	0	0	0	0	0	1.429	1.370	1.335	1.489	1.883	1.370	0.884	0.000	0.000	0.000	0.000	0.000	0.000	0.000	0.000	0.000	0.000	0.000	0.000	0.000	0.000	120	487	18575	17513	0.515	Error	Error	10929	7646	0	0	10123	7390	0	0	0	0
1	6	9	""	"YPL205C"	3380	14900	120	1366	1182	506	92	103	50	96	94	0	3042	2585	1201	101	108	40	93	90	0	0	0	0	0	0	0	0	0	0	0	0	0	0	0	0	0	0	0	0.433	0.439	0.431	0.471	2.133	0.419	0.866	0.000	0.000	0.000	0.000	0.000	0.000	0.000	0.000	0.000	0.000	0.000	0.000	0.000	0.000	120	455	4215	3574	-1.207	Error	Error	1274	2941	0	0	1090	2484	0	0	0	0
1	7	9	"SUI3"	"YPL237W"	3570	14900	120	4814	4345	1488	90	139	479	98	95	0	6592	5869	2270	96	153	608	95	91	0	0	0	0	0	0	0	0	0	0	0	0	0	0	0	0	0	0	0	0.727	0.737	0.747	0.784	1.708	0.723	0.913	0.000	0.000	0.000	0.000	0.000	0.000	0.000	0.000	0.000	0.000	0.000	0.000	0.000	0.000	120	487	11220	10028	-0.460	Error	Error	4724	6496	0	0	4255	5773	0	0	0	0
1	8	9	""	"YPL176C"	3740	14900	120	5633	5287	1776	100	257	925	97	93	0	9213	8926	3175	103	401	1666	93	91	0	0	0	0	0	0	0	0	0	0	0	0	0	0	0	0	0	0	0	0.607	0.588	0.599	0.614	1.452	0.567	0.907	0.000	0.000	0.000	0.000	0.000	0.000	0.000	0.000	0.000	0.000	0.000	0.000	0.000	0.000	120	533	14643	14010	-0.719	Error	Error	5533	9110	0	0	5187	8823	0	0	0	0
1	9	9	""	"YPL207W"	3930	14900	110	6553	6286	2704	110	395	1155	97	91	0	8564	8652	3892	115	657	2093	92	83	0	0	0	0	0	0	0	0	0	0	0	0	0	0	0	0	0	0	0	0.763	0.723	0.724	0.742	1.514	0.663	0.868	0.000	0.000	0.000	0.000	0.000	0.000	0.000	0.000	0.000	0.000	0.000	0.000	0.000	0.000	80	517	14892	14713	-0.391	Error	Error	6443	8449	0	0	6176	8537	0	0	0	0
1	10	9	"YAR1"	"YPL239W"	4130	14900	120	1113	1021	414	101	257	797	71	1	0	3519	3086	1361	106	364	1337	82	71	0	0	0	0	0	0	0	0	0	0	0	0	0	0	0	0	0	0	0	0.297	0.309	0.309	0.313	1.828	0.364	0.810	0.000	0.000	0.000	0.000	0.000	0.000	0.000	0.000	0.000	0.000	0.000	0.000	0.000	0.000	120	576	4425	3900	-1.754	Error	Error	1012	3413	0	0	920	2980	0	0	0	0
1	11	9	"MUD13"	"YPL178W"	4310	14900	110	9274	8425	3001	100	151	382	100	97	0	2735	2529	1026	102	143	219	97	93	0	0	0	0	0	0	0	0	0	0	0	0	0	0	0	0	0	0	0	3.484	3.430	3.348	3.652	1.572	3.454	0.891	0.000	0.000	0.000	0.000	0.000	0.000	0.000	0.000	0.000	0.000	0.000	0.000	0.000	0.000	80	493	11807	10752	1.801	Error	Error	9174	2633	0	0	8325	2427	0	0	0	0
1	12	9	"ipl1"	"YPL209C"	4510	14900	110	3042	2789	871	101	153	374	100	97	0	10268	9311	2808	109	149	211	100	100	0	0	0	0	0	0	0	0	0	0	0	0	0	0	0	0	0	0	0	0.289	0.292	0.286	0.293	1.322	0.285	0.916	0.000	0.000	0.000	0.000	0.000	0.000	0.000	0.000	0.000	0.000	0.000	0.000	0.000	0.000	80	522	13100	11890	-1.788	Error	Error	2941	10159	0	0	2688	9202	0	0	0	0
1	13	9	"cin2"	"YPL241C"	4700	14900	120	1369	1215	534	99	108	60	99	98	0	4442	3982	1753	111	126	136	95	94	0	0	0	0	0	0	0	0	0	0	0	0	0	0	0	0	0	0	0	0.293	0.288	0.303	0.308	1.941	0.284	0.893	0.000	0.000	0.000	0.000	0.000	0.000	0.000	0.000	0.000	0.000	0.000	0.000	0.000	0.000	120	528	5601	4987	-1.770	Error	Error	1270	4331	0	0	1116	3871	0	0	0	0
1	14	9	""	"YPL180W"	4880	14900	120	4876	4399	1760	99	111	47	100	100	0	12134	11224	4950	111	125	54	100	100	0	0	0	0	0	0	0	0	0	0	0	0	0	0	0	0	0	0	0	0.397	0.387	0.383	0.418	1.742	0.365	0.914	0.000	0.000	0.000	0.000	0.000	0.000	0.000	0.000	0.000	0.000	0.000	0.000	0.000	0.000	120	517	16800	15413	-1.332	Error	Error	4777	12023	0	0	4300	11113	0	0	0	0
1	15	9	"NIP7"	"YPL211W"	5080	14900	120	2313	2130	1052	96	105	59	99	97	0	4420	3729	2030	105	118	50	92	90	0	0	0	0	0	0	0	0	0	0	0	0	0	0	0	0	0	0	0	0.514	0.561	0.554	0.682	2.286	0.530	0.913	0.000	0.000	0.000	0.000	0.000	0.000	0.000	0.000	0.000	0.000	0.000	0.000	0.000	0.000	120	553	6532	5658	-0.961	Error	Error	2217	4315	0	0	2034	3624	0	0	0	0
1	16	9	"SRP68"	"YPL243W"	5280	14900	120	10168	9742	4914	100	108	50	100	100	0	4588	4544	2279	102	108	38	100	100	0	0	0	0	0	0	0	0	0	0	0	0	0	0	0	0	0	0	0	2.244	2.171	2.143	2.309	1.678	2.259	0.889	0.000	0.000	0.000	0.000	0.000	0.000	0.000	0.000	0.000	0.000	0.000	0.000	0.000	0.000	120	496	14554	14084	1.166	Error	Error	10068	4486	0	0	9642	4442	0	0	0	0
1	17	9	"EMPTY"	"EMPTY"	5470	14890	150	128	142	85	108	124	82	19	5	0	129	143	69	105	130	141	5	1	0	0	0	0	0	0	0	0	0	0	0	0	0	0	0	0	0	0	0	0.833	0.895	1.314	1.371	4.250	0.118	0.029	0.000	0.000	0.000	0.000	0.000	0.000	0.000	0.000	0.000	0.000	0.000	0.000	0.000	0.000	156	593	44	72	-0.263	Error	Error	20	24	0	0	34	38	0	0	-75	0
1	18	9	"EMPTY"	"EMPTY"	5660	14890	150	116	129	57	112	132	90	9	1	0	112	130	61	111	143	143	4	0	0	0	0	0	0	0	0	0	0	0	0	0	0	0	0	0	0	0	0	4.000	0.895	1.131	0.882	3.925	0.934	0.316	0.000	0.000	0.000	0.000	0.000	0.000	0.000	0.000	0.000	0.000	0.000	0.000	0.000	0.000	156	578	5	36	2.000	Error	Error	4	1	0	0	17	19	0	0	-75	0
1	19	9	"EMPTY"	"EMPTY"	5850	14890	150	129	139	67	114	163	557	0	0	0	135	144	61	118	214	742	0	0	0	0	0	0	0	0	0	0	0	0	0	0	0	0	0	0	0	0	0	0.882	0.962	1.232	1.137	3.528	1.159	0.196	0.000	0.000	0.000	0.000	0.000	0.000	0.000	0.000	0.000	0.000	0.000	0.000	0.000	0.000	156	602	32	51	-0.181	Error	Error	15	17	0	0	25	26	0	0	-75	0
1	20	9	"EMPTY"	"EMPTY"	6040	14890	150	127	142	63	112	154	552	0	0	0	129	155	78	117	224	779	0	0	0	0	0	0	0	0	0	0	0	0	0	0	0	0	0	0	0	0	0	1.250	0.789	0.914	1.032	3.862	2.491	0.137	0.000	0.000	0.000	0.000	0.000	0.000	0.000	0.000	0.000	0.000	0.000	0.000	0.000	0.000	156	611	27	68	0.322	Error	Error	15	12	0	0	30	38	0	0	-75	0
1	21	9	"EMPTY"	"EMPTY"	6230	14890	150	121	136	67	108	235	957	0	0	0	113	133	67	109	243	622	0	0	0	0	0	0	0	0	0	0	0	0	0	0	0	0	0	0	0	0	0	3.250	1.167	1.126	1.152	3.753	0.510	0.762	0.000	0.000	0.000	0.000	0.000	0.000	0.000	0.000	0.000	0.000	0.000	0.000	0.000	0.000	156	625	17	52	1.700	Error	Error	13	4	0	0	28	24	0	0	-75	0
1	22	9	"EMPTY"	"EMPTY"	6420	14890	150	122	135	71	99	160	606	0	0	0	122	142	89	108	164	384	0	0	0	0	0	0	0	0	0	0	0	0	0	0	0	0	0	0	0	0	0	1.643	1.059	1.308	1.327	3.999	0.669	0.232	0.000	0.000	0.000	0.000	0.000	0.000	0.000	0.000	0.000	0.000	0.000	0.000	0.000	0.000	156	827	37	70	0.716	Error	Error	23	14	0	0	36	34	0	0	-75	0
1	1	10	"EMPTY"	"EMPTY"	2440	15080	150	94	96	40	78	86	79	5	0	0	90	96	32	80	120	391	0	0	0	0	0	0	0	0	0	0	0	0	0	0	0	0	0	0	0	0	0	1.600	1.125	1.392	1.481	2.906	0.198	0.301	0.000	0.000	0.000	0.000	0.000	0.000	0.000	0.000	0.000	0.000	0.000	0.000	0.000	0.000	156	808	26	34	0.678	Error	Error	16	10	0	0	18	16	0	0	-75	0
1	2	10	"EMPTY"	"EMPTY"	2630	15080	150	92	107	70	82	90	68	13	2	0	86	101	48	84	109	251	1	0	0	0	0	0	0	0	0	0	0	0	0	0	0	0	0	0	0	0	0	5.000	1.471	1.318	1.246	3.618	2.134	0.185	0.000	0.000	0.000	0.000	0.000	0.000	0.000	0.000	0.000	0.000	0.000	0.000	0.000	0.000	156	589	12	42	2.322	Error	Error	10	2	0	0	25	17	0	0	-75	0
1	3	10	"EMPTY"	"EMPTY"	2820	15080	150	94	101	46	83	87	37	30	10	0	94	100	32	87	93	34	18	5	0	0	0	0	0	0	0	0	0	0	0	0	0	0	0	0	0	0	0	1.571	1.385	1.591	1.430	3.902	2.200	0.075	0.000	0.000	0.000	0.000	0.000	0.000	0.000	0.000	0.000	0.000	0.000	0.000	0.000	0.000	156	568	18	31	0.652	Error	Error	11	7	0	0	18	13	0	0	-75	0
1	4	10	"EMPTY"	"EMPTY"	3010	15080	150	92	99	43	84	97	72	10	0	0	103	112	48	89	127	296	0	0	0	0	0	0	0	0	0	0	0	0	0	0	0	0	0	0	0	0	0	0.571	0.652	1.000	1.149	3.583	0.787	0.127	0.000	0.000	0.000	0.000	0.000	0.000	0.000	0.000	0.000	0.000	0.000	0.000	0.000	0.000	156	594	22	38	-0.807	Error	Error	8	14	0	0	15	23	0	0	-75	0
1	5	10	"EMPTY"	"EMPTY"	3200	15080	150	98	106	42	84	95	55	19	3	0	98	109	44	89	105	124	2	0	0	0	0	0	0	0	0	0	0	0	0	0	0	0	0	0	0	0	0	1.556	1.100	1.045	1.241	3.634	1.052	0.058	0.000	0.000	0.000	0.000	0.000	0.000	0.000	0.000	0.000	0.000	0.000	0.000	0.000	0.000	156	594	23	42	0.637	Error	Error	14	9	0	0	22	20	0	0	-75	0
1	6	10	"EMPTY"	"EMPTY"	3390	15080	150	99	109	53	84	90	39	29	12	0	94	105	41	92	98	43	19	4	0	0	0	0	0	0	0	0	0	0	0	0	0	0	0	0	0	0	0	7.500	1.923	1.536	1.410	4.163	1.525	0.154	0.000	0.000	0.000	0.000	0.000	0.000	0.000	0.000	0.000	0.000	0.000	0.000	0.000	0.000	156	628	17	38	2.907	Error	Error	15	2	0	0	25	13	0	0	-75	0
1	7	10	""	"iYBL019W"	3580	15090	110	567	545	228	87	95	51	93	90	0	449	424	190	90	99	52	86	83	0	0	0	0	0	0	0	0	0	0	0	0	0	0	0	0	0	0	0	1.337	1.371	1.391	1.529	2.125	1.354	0.779	0.000	0.000	0.000	0.000	0.000	0.000	0.000	0.000	0.000	0.000	0.000	0.000	0.000	0.000	80	479	839	792	0.419	Error	Error	480	359	0	0	458	334	0	0	0	0
1	8	10	""	"iYBL015W"	3770	15090	110	4797	4579	2180	95	133	170	100	98	0	6149	5581	2840	98	157	321	96	96	0	0	0	0	0	0	0	0	0	0	0	0	0	0	0	0	0	0	0	0.777	0.818	0.851	0.894	2.070	0.790	0.895	0.000	0.000	0.000	0.000	0.000	0.000	0.000	0.000	0.000	0.000	0.000	0.000	0.000	0.000	80	539	10753	9967	-0.364	Error	Error	4702	6051	0	0	4484	5483	0	0	0	0
1	9	10	""	"iYBL014C"	3990	15090	100	1117	940	432	96	148	290	82	73	0	2475	2059	1019	98	182	512	83	77	0	0	0	0	0	0	0	0	0	0	0	0	0	0	0	0	0	0	0	0.430	0.430	0.433	0.497	2.550	0.412	0.858	0.000	0.000	0.000	0.000	0.000	0.000	0.000	0.000	0.000	0.000	0.000	0.000	0.000	0.000	80	467	3398	2805	-1.219	Error	Error	1021	2377	0	0	844	1961	0	0	0	0
1	10	10	""	"iYBR001C"	4150	15090	110	2756	2732	509	94	110	71	100	100	0	1846	1828	366	96	120	96	100	100	0	0	0	0	0	0	0	0	0	0	0	0	0	0	0	0	0	0	0	1.521	1.523	1.547	1.528	1.189	1.509	0.927	0.000	0.000	0.000	0.000	0.000	0.000	0.000	0.000	0.000	0.000	0.000	0.000	0.000	0.000	80	472	4412	4370	0.605	Error	Error	2662	1750	0	0	2638	1732	0	0	0	0
1	11	10	""	"iYBR005W"	4340	15090	110	7573	7169	3415	96	124	249	100	98	0	3688	3287	1612	94	124	138	98	97	0	0	0	0	0	0	0	0	0	0	0	0	0	0	0	0	0	0	0	2.080	2.215	2.102	2.296	1.702	2.219	0.891	0.000	0.000	0.000	0.000	0.000	0.000	0.000	0.000	0.000	0.000	0.000	0.000	0.000	0.000	80	542	11071	10266	1.057	Error	Error	7477	3594	0	0	7073	3193	0	0	0	0
1	12	10	""	"iYBR008C"	4540	15090	110	5372	4899	2373	93	102	72	100	100	0	5372	4742	2391	97	110	134	98	97	0	0	0	0	0	0	0	0	0	0	0	0	0	0	0	0	0	0	0	1.001	1.035	1.026	1.107	1.805	1.023	0.872	0.000	0.000	0.000	0.000	0.000	0.000	0.000	0.000	0.000	0.000	0.000	0.000	0.000	0.000	80	540	10554	9451	0.001	Error	Error	5279	5275	0	0	4806	4645	0	0	0	0
1	13	10	""	"iYBR022W"	4730	15090	110	2695	2296	990	94	103	74	100	100	0	1031	890	414	95	110	139	87	82	0	0	0	0	0	0	0	0	0	0	0	0	0	0	0	0	0	0	0	2.779	2.770	2.781	2.832	1.572	2.782	0.776	0.000	0.000	0.000	0.000	0.000	0.000	0.000	0.000	0.000	0.000	0.000	0.000	0.000	0.000	80	501	3537	2997	1.474	Error	Error	2601	936	0	0	2202	795	0	0	0	0
1	14	10	""	"iYBR027C"	4910	15090	110	569	548	226	94	104	72	93	90	0	821	726	308	99	111	144	90	82	0	0	0	0	0	0	0	0	0	0	0	0	0	0	0	0	0	0	0	0.658	0.724	0.726	0.777	2.002	0.589	0.660	0.000	0.000	0.000	0.000	0.000	0.000	0.000	0.000	0.000	0.000	0.000	0.000	0.000	0.000	80	511	1197	1081	-0.604	Error	Error	475	722	0	0	454	627	0	0	0	0
1	15	10	""	"iYBR031W"	5110	15090	110	2966	2603	1203	92	103	79	97	97	0	1082	920	468	100	110	148	82	80	0	0	0	0	0	0	0	0	0	0	0	0	0	0	0	0	0	0	0	2.927	3.062	3.063	3.459	1.946	3.052	0.886	0.000	0.000	0.000	0.000	0.000	0.000	0.000	0.000	0.000	0.000	0.000	0.000	0.000	0.000	80	491	3856	3331	1.549	Error	Error	2874	982	0	0	2511	820	0	0	0	0
1	16	10	""	"iYBRWdelta16"	5290	15090	120	4251	3642	1601	97	107	62	96	96	0	4112	3602	2034	98	103	43	96	94	0	0	0	0	0	0	0	0	0	0	0	0	0	0	0	0	0	0	0	1.035	1.012	1.042	1.206	1.948	0.932	0.740	0.000	0.000	0.000	0.000	0.000	0.000	0.000	0.000	0.000	0.000	0.000	0.000	0.000	0.000	120	550	8168	7049	0.049	Error	Error	4154	4014	0	0	3545	3504	0	0	0	0
1	17	10	""	"iYBR048W"	5480	15090	110	11046	9847	3804	99	149	334	100	100	0	3861	3299	1354	97	134	221	100	97	0	0	0	0	0	0	0	0	0	0	0	0	0	0	0	0	0	0	0	2.908	3.044	3.013	3.137	1.410	3.029	0.917	0.000	0.000	0.000	0.000	0.000	0.000	0.000	0.000	0.000	0.000	0.000	0.000	0.000	0.000	80	504	14711	12950	1.540	Error	Error	10947	3764	0	0	9748	3202	0	0	0	0
1	18	10	""	"iYBR053C-0"	5670	15090	110	1405	1332	447	112	159	328	96	87	0	5943	5529	2102	111	154	252	100	100	0	0	0	0	0	0	0	0	0	0	0	0	0	0	0	0	0	0	0	0.222	0.225	0.221	0.233	1.502	0.212	0.884	0.000	0.000	0.000	0.000	0.000	0.000	0.000	0.000	0.000	0.000	0.000	0.000	0.000	0.000	80	521	7125	6638	-2.173	Error	Error	1293	5832	0	0	1220	5418	0	0	0	0
1	19	10	""	"iYCR022C"	5870	15090	110	6125	5622	2324	104	152	612	96	88	0	4077	3674	1629	111	193	740	92	82	0	0	0	0	0	0	0	0	0	0	0	0	0	0	0	0	0	0	0	1.518	1.549	1.537	1.599	1.686	1.492	0.783	0.000	0.000	0.000	0.000	0.000	0.000	0.000	0.000	0.000	0.000	0.000	0.000	0.000	0.000	80	522	9987	9081	0.602	Error	Error	6021	3966	0	0	5518	3563	0	0	0	0
1	20	10	""	"iYCR025C"	6060	15090	110	1212	1070	494	102	144	613	76	36	0	4666	3946	2292	109	198	747	81	75	0	0	0	0	0	0	0	0	0	0	0	0	0	0	0	0	0	0	0	0.244	0.252	0.256	0.295	2.330	0.249	0.377	0.000	0.000	0.000	0.000	0.000	0.000	0.000	0.000	0.000	0.000	0.000	0.000	0.000	0.000	80	486	5667	4805	-2.038	Error	Error	1110	4557	0	0	968	3837	0	0	0	0
1	21	10	""	"iYCRWdelta11"	6230	15090	110	14087	12216	6216	107	320	1368	92	88	0	4499	3801	2372	108	234	586	78	75	0	0	0	0	0	0	0	0	0	0	0	0	0	0	0	0	0	0	0	3.184	3.279	3.230	4.106	2.304	3.127	0.877	0.000	0.000	0.000	0.000	0.000	0.000	0.000	0.000	0.000	0.000	0.000	0.000	0.000	0.000	80	492	18371	15802	1.671	Error	Error	13980	4391	0	0	12109	3693	0	0	0	0
1	22	10	""	"iYCR043C"	6430	15090	100	631	616	249	99	284	1293	1	0	0	986	861	338	107	203	511	75	16	0	0	0	0	0	0	0	0	0	0	0	0	0	0	0	0	0	0	0	0.605	0.686	0.684	0.713	1.889	0.633	0.787	0.000	0.000	0.000	0.000	0.000	0.000	0.000	0.000	0.000	0.000	0.000	0.000	0.000	0.000	80	489	1411	1271	-0.724	Error	Error	532	879	0	0	517	754	0	0	0	0
1	1	11	""	"iYCR047C"	2450	15280	100	1611	1580	537	81	81	30	100	100	0	2634	2464	981	81	84	23	98	97	0	0	0	0	0	0	0	0	0	0	0	0	0	0	0	0	0	0	0	0.599	0.629	0.610	0.671	1.546	0.586	0.875	0.000	0.000	0.000	0.000	0.000	0.000	0.000	0.000	0.000	0.000	0.000	0.000	0.000	0.000	80	480	4083	3882	-0.739	Error	Error	1530	2553	0	0	1499	2383	0	0	0	0
1	2	11	""	"iYCR053W"	2640	15290	110	3894	3311	1455	82	103	221	96	95	0	834	725	383	85	104	229	78	71	0	0	0	0	0	0	0	0	0	0	0	0	0	0	0	0	0	0	0	5.089	5.045	4.844	5.172	1.563	5.108	0.884	0.000	0.000	0.000	0.000	0.000	0.000	0.000	0.000	0.000	0.000	0.000	0.000	0.000	0.000	80	512	4561	3869	2.348	Error	Error	3812	749	0	0	3229	640	0	0	0	0
1	3	11	""	"iYCR075C"	2830	15280	110	4166	3804	1604	88	111	225	97	93	0	5355	4814	2257	87	120	284	91	91	0	0	0	0	0	0	0	0	0	0	0	0	0	0	0	0	0	0	0	0.774	0.786	0.757	0.952	2.290	0.750	0.917	0.000	0.000	0.000	0.000	0.000	0.000	0.000	0.000	0.000	0.000	0.000	0.000	0.000	0.000	80	511	9346	8443	-0.369	Error	Error	4078	5268	0	0	3716	4727	0	0	0	0
1	4	11	""	"iYCR081W"	3020	15280	100	2305	2117	675	84	91	52	100	100	0	2210	2015	780	89	106	176	95	91	0	0	0	0	0	0	0	0	0	0	0	0	0	0	0	0	0	0	0	1.047	1.056	1.063	1.201	2.033	1.022	0.881	0.000	0.000	0.000	0.000	0.000	0.000	0.000	0.000	0.000	0.000	0.000	0.000	0.000	0.000	80	466	4342	3959	0.066	Error	Error	2221	2121	0	0	2033	1926	0	0	0	0
1	5	11	""	"iYCR085W"	3220	15280	110	645	614	265	80	88	43	97	96	0	1414	1497	751	88	92	29	96	95	0	0	0	0	0	0	0	0	0	0	0	0	0	0	0	0	0	0	0	0.426	0.379	0.402	0.434	1.912	0.348	0.828	0.000	0.000	0.000	0.000	0.000	0.000	0.000	0.000	0.000	0.000	0.000	0.000	0.000	0.000	80	510	1891	1943	-1.231	Error	Error	565	1326	0	0	534	1409	0	0	0	0
1	6	11	""	"itT(AGU)C"	3400	15280	110	3584	3153	1628	84	92	47	96	96	0	1783	1567	851	89	98	52	91	88	0	0	0	0	0	0	0	0	0	0	0	0	0	0	0	0	0	0	0	2.066	2.076	2.066	2.180	1.906	2.053	0.907	0.000	0.000	0.000	0.000	0.000	0.000	0.000	0.000	0.000	0.000	0.000	0.000	0.000	0.000	80	499	5194	4547	1.047	Error	Error	3500	1694	0	0	3069	1478	0	0	0	0
1	7	11	""	"iYCR100C"	3590	15280	110	1620	1487	605	93	122	125	97	95	0	3133	2791	1238	96	116	90	95	92	0	0	0	0	0	0	0	0	0	0	0	0	0	0	0	0	0	0	0	0.503	0.517	0.525	0.580	1.944	0.495	0.885	0.000	0.000	0.000	0.000	0.000	0.000	0.000	0.000	0.000	0.000	0.000	0.000	0.000	0.000	80	528	4564	4089	-0.992	Error	Error	1527	3037	0	0	1394	2695	0	0	0	0
1	8	11	""	"iYCR103C"	3780	15280	110	17696	15511	7982	104	148	149	100	98	0	9506	8011	4502	100	128	122	91	90	0	0	0	0	0	0	0	0	0	0	0	0	0	0	0	0	0	0	0	1.870	1.948	1.879	2.296	2.024	1.896	0.917	0.000	0.000	0.000	0.000	0.000	0.000	0.000	0.000	0.000	0.000	0.000	0.000	0.000	0.000	80	538	26998	23318	0.903	Error	Error	17592	9406	0	0	15407	7911	0	0	0	0
1	9	11	""	"iYDR045C"	3980	15280	110	5878	5342	1546	100	131	127	100	100	0	3236	2987	908	98	121	123	100	98	0	0	0	0	0	0	0	0	0	0	0	0	0	0	0	0	0	0	0	1.841	1.814	1.870	1.878	1.459	1.839	0.918	0.000	0.000	0.000	0.000	0.000	0.000	0.000	0.000	0.000	0.000	0.000	0.000	0.000	0.000	80	526	8916	8131	0.881	Error	Error	5778	3138	0	0	5242	2889	0	0	0	0
1	10	11	""	"iYDR050C"	4160	15280	100	2132	1953	626	92	99	42	100	100	0	5224	4541	1906	96	106	48	98	97	0	0	0	0	0	0	0	0	0	0	0	0	0	0	0	0	0	0	0	0.398	0.419	0.423	0.485	1.888	0.383	0.883	0.000	0.000	0.000	0.000	0.000	0.000	0.000	0.000	0.000	0.000	0.000	0.000	0.000	0.000	80	478	7168	6306	-1.330	Error	Error	2040	5128	0	0	1861	4445	0	0	0	0
1	11	11	""	"iYDR055W"	4370	15280	100	1170	1049	463	92	99	47	95	93	0	1743	1489	709	95	108	76	91	87	0	0	0	0	0	0	0	0	0	0	0	0	0	0	0	0	0	0	0	0.654	0.687	0.688	0.750	2.089	0.668	0.883	0.000	0.000	0.000	0.000	0.000	0.000	0.000	0.000	0.000	0.000	0.000	0.000	0.000	0.000	80	469	2726	2351	-0.612	Error	Error	1078	1648	0	0	957	1394	0	0	0	0
1	12	11	""	"iYDR070C"	4540	15280	110	2689	2485	739	96	104	49	100	100	0	2922	2708	791	97	109	70	100	100	0	0	0	0	0	0	0	0	0	0	0	0	0	0	0	0	0	0	0	0.918	0.915	0.912	0.913	1.535	0.902	0.918	0.000	0.000	0.000	0.000	0.000	0.000	0.000	0.000	0.000	0.000	0.000	0.000	0.000	0.000	80	502	5418	5000	-0.124	Error	Error	2593	2825	0	0	2389	2611	0	0	0	0
1	13	11	""	"iYDR074W"	4730	15280	110	1728	1588	655	93	100	58	96	93	0	3106	2749	1228	98	106	42	96	95	0	0	0	0	0	0	0	0	0	0	0	0	0	0	0	0	0	0	0	0.544	0.564	0.570	0.612	1.868	0.531	0.886	0.000	0.000	0.000	0.000	0.000	0.000	0.000	0.000	0.000	0.000	0.000	0.000	0.000	0.000	80	538	4643	4146	-0.880	Error	Error	1635	3008	0	0	1495	2651	0	0	0	0
1	14	11	""	"iYDR078C"	4920	15280	100	1368	1248	441	90	93	35	98	98	0	1871	1693	684	98	104	34	96	96	0	0	0	0	0	0	0	0	0	0	0	0	0	0	0	0	0	0	0	0.721	0.726	0.722	0.739	1.399	0.683	0.898	0.000	0.000	0.000	0.000	0.000	0.000	0.000	0.000	0.000	0.000	0.000	0.000	0.000	0.000	80	488	3051	2753	-0.472	Error	Error	1278	1773	0	0	1158	1595	0	0	0	0
1	15	11	""	"iYDR092W"	5120	15280	110	1090	1112	323	89	110	118	100	100	0	3504	3273	1012	99	112	89	100	100	0	0	0	0	0	0	0	0	0	0	0	0	0	0	0	0	0	0	0	0.294	0.322	0.326	0.326	1.325	0.307	0.896	0.000	0.000	0.000	0.000	0.000	0.000	0.000	0.000	0.000	0.000	0.000	0.000	0.000	0.000	80	550	4406	4197	-1.766	Error	Error	1001	3405	0	0	1023	3174	0	0	0	0
1	16	11	""	"iYDR098C"	5320	15280	110	664	600	237	88	101	76	92	88	0	653	585	261	93	105	62	87	85	0	0	0	0	0	0	0	0	0	0	0	0	0	0	0	0	0	0	0	1.029	1.041	1.023	1.090	2.059	1.041	0.809	0.000	0.000	0.000	0.000	0.000	0.000	0.000	0.000	0.000	0.000	0.000	0.000	0.000	0.000	80	523	1136	1004	0.041	Error	Error	576	560	0	0	512	492	0	0	0	0
1	17	11	""	"iYDRCdelta9-1"	5500	15290	110	396	382	173	93	140	409	23	0	0	727	745	396	96	136	353	83	41	0	0	0	0	0	0	0	0	0	0	0	0	0	0	0	0	0	0	0	0.480	0.445	0.464	0.494	2.015	0.435	0.736	0.000	0.000	0.000	0.000	0.000	0.000	0.000	0.000	0.000	0.000	0.000	0.000	0.000	0.000	80	507	934	938	-1.058	Error	Error	303	631	0	0	289	649	0	0	0	0
1	18	11	""	"iYDR115W"	5680	15280	110	607	570	182	99	109	54	97	95	0	1177	1092	346	105	120	131	97	91	0	0	0	0	0	0	0	0	0	0	0	0	0	0	0	0	0	0	0	0.474	0.477	0.514	0.488	1.550	0.463	0.837	0.000	0.000	0.000	0.000	0.000	0.000	0.000	0.000	0.000	0.000	0.000	0.000	0.000	0.000	80	510	1580	1458	-1.077	Error	Error	508	1072	0	0	471	987	0	0	0	0
1	19	11	""	"iYDR119W"	5880	15280	110	7094	6788	2748	106	235	1198	96	93	0	3662	3379	1485	112	214	846	90	82	0	0	0	0	0	0	0	0	0	0	0	0	0	0	0	0	0	0	0	1.968	2.045	2.011	2.192	1.555	2.012	0.906	0.000	0.000	0.000	0.000	0.000	0.000	0.000	0.000	0.000	0.000	0.000	0.000	0.000	0.000	80	530	10538	9949	0.977	Error	Error	6988	3550	0	0	6682	3267	0	0	0	0
1	20	11	""	"iYDR123C"	6060	15280	110	2573	2468	1089	103	168	510	92	86	0	4503	4346	2155	104	168	388	95	90	0	0	0	0	0	0	0	0	0	0	0	0	0	0	0	0	0	0	0	0.561	0.558	0.565	0.596	1.494	0.547	0.852	0.000	0.000	0.000	0.000	0.000	0.000	0.000	0.000	0.000	0.000	0.000	0.000	0.000	0.000	80	531	6869	6607	-0.833	Error	Error	2470	4399	0	0	2365	4242	0	0	0	0
1	21	11	""	"iYDR431W"	6290	15270	110	254	251	102	95	154	689	0	0	0	488	443	197	99	136	308	67	3	0	0	0	0	0	0	0	0	0	0	0	0	0	0	0	0	0	0	0	0.409	0.453	0.424	0.442	2.028	0.432	0.652	0.000	0.000	0.000	0.000	0.000	0.000	0.000	0.000	0.000	0.000	0.000	0.000	0.000	0.000	80	521	548	500	-1.291	Error	Error	159	389	0	0	156	344	0	0	0	0
1	22	11	""	"iYDR436W"	6450	15280	110	1244	1140	569	88	105	99	88	85	0	2248	2043	1172	100	147	281	83	80	0	0	0	0	0	0	0	0	0	0	0	0	0	0	0	0	0	0	0	0.538	0.541	0.537	0.596	1.973	0.487	0.897	0.000	0.000	0.000	0.000	0.000	0.000	0.000	0.000	0.000	0.000	0.000	0.000	0.000	0.000	80	519	3304	2995	-0.894	Error	Error	1156	2148	0	0	1052	1943	0	0	0	0
1	1	12	""	"iYDR439W-1"	2450	15470	110	10515	9029	4234	81	146	575	98	90	0	5273	4491	2267	83	137	441	95	85	0	0	0	0	0	0	0	0	0	0	0	0	0	0	0	0	0	0	0	2.010	2.030	2.063	2.119	1.602	2.057	0.901	0.000	0.000	0.000	0.000	0.000	0.000	0.000	0.000	0.000	0.000	0.000	0.000	0.000	0.000	80	559	15624	13356	1.007	Error	Error	10434	5190	0	0	8948	4408	0	0	0	0
1	2	12	""	"iYDR457W"	2650	15470	110	302	312	108	89	149	570	0	0	0	284	278	123	88	148	452	3	0	0	0	0	0	0	0	0	0	0	0	0	0	0	0	0	0	0	0	0	1.087	1.174	1.160	1.257	2.085	1.189	0.562	0.000	0.000	0.000	0.000	0.000	0.000	0.000	0.000	0.000	0.000	0.000	0.000	0.000	0.000	80	526	409	413	0.120	Error	Error	213	196	0	0	223	190	0	0	0	0
1	3	12	""	"iYDR461W"	2840	15470	110	1610	1411	748	88	102	172	86	81	0	5735	4742	2660	92	121	254	91	90	0	0	0	0	0	0	0	0	0	0	0	0	0	0	0	0	0	0	0	0.270	0.285	0.292	0.315	2.035	0.260	0.852	0.000	0.000	0.000	0.000	0.000	0.000	0.000	0.000	0.000	0.000	0.000	0.000	0.000	0.000	80	516	7165	5973	-1.890	Error	Error	1522	5643	0	0	1323	4650	0	0	0	0
1	4	12	""	"iYDR465C"	3020	15470	110	3053	2699	1167	84	91	43	100	98	0	5821	4909	2440	94	106	76	95	93	0	0	0	0	0	0	0	0	0	0	0	0	0	0	0	0	0	0	0	0.518	0.543	0.546	0.681	2.335	0.514	0.909	0.000	0.000	0.000	0.000	0.000	0.000	0.000	0.000	0.000	0.000	0.000	0.000	0.000	0.000	80	514	8696	7430	-0.948	Error	Error	2969	5727	0	0	2615	4815	0	0	0	0
1	5	12	""	"iYDR481C"	3220	15470	110	1507	1366	519	85	91	41	100	100	0	2999	2644	1084	94	103	40	98	93	0	0	0	0	0	0	0	0	0	0	0	0	0	0	0	0	0	0	0	0.490	0.502	0.513	0.579	1.985	0.492	0.901	0.000	0.000	0.000	0.000	0.000	0.000	0.000	0.000	0.000	0.000	0.000	0.000	0.000	0.000	80	526	4327	3831	-1.031	Error	Error	1422	2905	0	0	1281	2550	0	0	0	0
1	6	12	""	"iYDR485C"	3400	15470	110	1453	1263	629	84	91	44	95	92	0	3384	2766	1511	93	113	141	90	87	0	0	0	0	0	0	0	0	0	0	0	0	0	0	0	0	0	0	0	0.416	0.441	0.430	0.474	1.744	0.415	0.897	0.000	0.000	0.000	0.000	0.000	0.000	0.000	0.000	0.000	0.000	0.000	0.000	0.000	0.000	80	505	4660	3852	-1.265	Error	Error	1369	3291	0	0	1179	2673	0	0	0	0
1	7	12	""	"iYDR489W"	3590	15470	110	1086	991	477	88	107	107	91	85	0	1862	1566	786	95	121	151	88	82	0	0	0	0	0	0	0	0	0	0	0	0	0	0	0	0	0	0	0	0.565	0.614	0.640	0.644	1.703	0.603	0.895	0.000	0.000	0.000	0.000	0.000	0.000	0.000	0.000	0.000	0.000	0.000	0.000	0.000	0.000	80	528	2765	2374	-0.824	Error	Error	998	1767	0	0	903	1471	0	0	0	0
1	8	12	""	"itL(CAA)D"	3780	15470	110	2992	2668	1472	89	106	83	95	90	0	2192	2014	1257	94	111	86	87	86	0	0	0	0	0	0	0	0	0	0	0	0	0	0	0	0	0	0	0	1.384	1.343	1.307	1.502	2.053	1.292	0.883	0.000	0.000	0.000	0.000	0.000	0.000	0.000	0.000	0.000	0.000	0.000	0.000	0.000	0.000	80	526	5001	4499	0.469	Error	Error	2903	2098	0	0	2579	1920	0	0	0	0
1	9	12	""	"iYDR511W"	3960	15470	110	497	499	171	93	102	77	92	90	0	614	571	191	93	110	101	92	88	0	0	0	0	0	0	0	0	0	0	0	0	0	0	0	0	0	0	0	0.775	0.849	0.841	0.831	1.586	0.806	0.766	0.000	0.000	0.000	0.000	0.000	0.000	0.000	0.000	0.000	0.000	0.000	0.000	0.000	0.000	80	516	925	884	-0.367	Error	Error	404	521	0	0	406	478	0	0	0	0
1	10	12	""	"iYDR516C"	4150	15470	110	3624	3165	1523	91	119	205	95	88	0	4783	4128	2073	96	152	410	86	83	0	0	0	0	0	0	0	0	0	0	0	0	0	0	0	0	0	0	0	0.754	0.762	0.794	0.891	2.072	0.739	0.889	0.000	0.000	0.000	0.000	0.000	0.000	0.000	0.000	0.000	0.000	0.000	0.000	0.000	0.000	80	542	8220	7106	-0.408	Error	Error	3533	4687	0	0	3074	4032	0	0	0	0
1	11	12	""	"iYER141W"	4350	15470	110	742	710	276	89	112	200	87	83	0	421	401	162	95	146	413	17	0	0	0	0	0	0	0	0	0	0	0	0	0	0	0	0	0	0	0	0	2.003	2.029	2.060	2.234	2.086	2.116	0.764	0.000	0.000	0.000	0.000	0.000	0.000	0.000	0.000	0.000	0.000	0.000	0.000	0.000	0.000	80	526	979	927	1.002	Error	Error	653	326	0	0	621	306	0	0	0	0
1	12	12	""	"iYER145C"	4530	15470	110	951	988	513	99	106	57	95	92	0	2274	2391	1243	100	135	230	92	90	0	0	0	0	0	0	0	0	0	0	0	0	0	0	0	0	0	0	0	0.392	0.388	0.381	0.392	1.892	0.357	0.867	0.000	0.000	0.000	0.000	0.000	0.000	0.000	0.000	0.000	0.000	0.000	0.000	0.000	0.000	80	516	3026	3180	-1.351	Error	Error	852	2174	0	0	889	2291	0	0	0	0
1	13	12	""	"iYER149C"	4720	15480	110	4575	4159	2261	99	119	123	97	95	0	4591	3958	2150	104	148	295	87	83	0	0	0	0	0	0	0	0	0	0	0	0	0	0	0	0	0	0	0	0.998	1.053	1.055	1.217	2.071	1.017	0.875	0.000	0.000	0.000	0.000	0.000	0.000	0.000	0.000	0.000	0.000	0.000	0.000	0.000	0.000	80	528	8963	7914	-0.004	Error	Error	4476	4487	0	0	4060	3854	0	0	0	0
1	14	12	""	"iYER163C-0"	4920	15480	110	1492	1283	666	89	111	136	87	82	0	5056	4203	2582	99	127	271	85	81	0	0	0	0	0	0	0	0	0	0	0	0	0	0	0	0	0	0	0	0.283	0.291	0.282	0.371	2.529	0.259	0.848	0.000	0.000	0.000	0.000	0.000	0.000	0.000	0.000	0.000	0.000	0.000	0.000	0.000	0.000	80	503	6360	5298	-1.821	Error	Error	1403	4957	0	0	1194	4104	0	0	0	0
1	15	12	""	"iYER166W"	5090	15470	110	3251	2885	1298	89	107	124	98	98	0	6021	5210	2552	97	130	249	98	96	0	0	0	0	0	0	0	0	0	0	0	0	0	0	0	0	0	0	0	0.534	0.547	0.549	0.583	1.673	0.519	0.908	0.000	0.000	0.000	0.000	0.000	0.000	0.000	0.000	0.000	0.000	0.000	0.000	0.000	0.000	80	503	9086	7909	-0.906	Error	Error	3162	5924	0	0	2796	5113	0	0	0	0
1	16	12	""	"iYER170W"	5290	15480	110	996	925	366	91	110	126	93	88	0	2520	2208	1024	96	129	251	91	86	0	0	0	0	0	0	0	0	0	0	0	0	0	0	0	0	0	0	0	0.373	0.395	0.394	0.469	2.192	0.363	0.863	0.000	0.000	0.000	0.000	0.000	0.000	0.000	0.000	0.000	0.000	0.000	0.000	0.000	0.000	80	496	3329	2946	-1.421	Error	Error	905	2424	0	0	834	2112	0	0	0	0
1	17	12	""	"iYER183C-1"	5460	15470	110	8302	7487	3306	100	335	1178	91	85	0	5448	4541	2165	104	289	898	88	83	0	0	0	0	0	0	0	0	0	0	0	0	0	0	0	0	0	0	0	1.535	1.665	1.677	1.751	1.617	1.611	0.914	0.000	0.000	0.000	0.000	0.000	0.000	0.000	0.000	0.000	0.000	0.000	0.000	0.000	0.000	80	480	13546	11824	0.618	Error	Error	8202	5344	0	0	7387	4437	0	0	0	0
1	18	12	""	"iYERComega1-0"	5660	15470	120	2696	2539	1304	118	324	1098	83	58	0	4066	3931	2327	115	279	837	85	80	0	0	0	0	0	0	0	0	0	0	0	0	0	0	0	0	0	0	0	0.652	0.634	0.652	0.750	2.224	0.591	0.868	0.000	0.000	0.000	0.000	0.000	0.000	0.000	0.000	0.000	0.000	0.000	0.000	0.000	0.000	120	554	6529	6237	-0.616	Error	Error	2578	3951	0	0	2421	3816	0	0	0	0
1	19	12	""	"iYERWomega2-1"	5840	15470	110	23325	23341	15506	130	922	4101	85	77	0	10225	9656	6390	119	564	2247	77	73	0	0	0	0	0	0	0	0	0	0	0	0	0	0	0	0	0	0	0	2.295	2.434	2.475	2.776	2.308	2.434	0.892	0.000	0.000	0.000	0.000	0.000	0.000	0.000	0.000	0.000	0.000	0.000	0.000	0.000	0.000	80	526	33301	32748	1.199	Error	Error	23195	10106	0	0	23211	9537	0	0	0	0
1	20	12	""	"iYFL054C"	6050	15470	120	725	706	291	111	814	3879	0	0	0	1180	1103	501	108	505	2126	0	0	0	0	0	0	0	0	0	0	0	0	0	0	0	0	0	0	0	0	0	0.573	0.598	0.589	0.612	2.060	0.586	0.737	0.000	0.000	0.000	0.000	0.000	0.000	0.000	0.000	0.000	0.000	0.000	0.000	0.000	0.000	120	591	1686	1590	-0.804	Error	Error	614	1072	0	0	595	995	0	0	0	0
1	21	12	""	"iYFL051C-0"	6240	15470	120	14134	13971	7551	93	106	109	100	99	0	7964	7331	3783	96	123	257	92	89	0	0	0	0	0	0	0	0	0	0	0	0	0	0	0	0	0	0	0	1.785	1.918	1.924	2.183	2.279	2.023	0.884	0.000	0.000	0.000	0.000	0.000	0.000	0.000	0.000	0.000	0.000	0.000	0.000	0.000	0.000	120	541	21909	21113	0.836	Error	Error	14041	7868	0	0	13878	7235	0	0	0	0
1	22	12	""	"iYFL048C"	6400	15470	110	748	703	188	86	110	103	100	97	0	1329	1266	347	98	148	247	98	95	0	0	0	0	0	0	0	0	0	0	0	0	0	0	0	0	0	0	0	0.538	0.528	0.537	0.533	1.343	0.488	0.864	0.000	0.000	0.000	0.000	0.000	0.000	0.000	0.000	0.000	0.000	0.000	0.000	0.000	0.000	80	502	1893	1785	-0.895	Error	Error	662	1231	0	0	617	1168	0	0	0	0
1	1	13	""	"iYGL095C"	2470	15650	110	3371	2982	1316	82	126	495	91	86	0	3073	2654	1260	84	106	280	92	83	0	0	0	0	0	0	0	0	0	0	0	0	0	0	0	0	0	0	0	1.100	1.128	1.092	1.231	1.856	1.132	0.856	0.000	0.000	0.000	0.000	0.000	0.000	0.000	0.000	0.000	0.000	0.000	0.000	0.000	0.000	80	577	6278	5470	0.138	Error	Error	3289	2989	0	0	2900	2570	0	0	0	0
1	2	13	""	"iYGL091C"	2670	15650	90	177	181	60	80	92	68	71	30	0	189	196	72	88	95	52	82	48	0	0	0	0	0	0	0	0	0	0	0	0	0	0	0	0	0	0	0	0.960	0.935	0.871	0.780	2.896	1.021	0.349	0.000	0.000	0.000	0.000	0.000	0.000	0.000	0.000	0.000	0.000	0.000	0.000	0.000	0.000	52	402	198	209	-0.058	Error	Error	97	101	0	0	101	108	0	0	0	0
1	3	13	""	"iYGL087C"	2860	15660	110	1337	1198	478	82	94	68	98	93	0	3369	2893	1267	88	95	71	96	93	0	0	0	0	0	0	0	0	0	0	0	0	0	0	0	0	0	0	0	0.383	0.398	0.400	0.433	1.686	0.376	0.892	0.000	0.000	0.000	0.000	0.000	0.000	0.000	0.000	0.000	0.000	0.000	0.000	0.000	0.000	80	513	4536	3921	-1.386	Error	Error	1255	3281	0	0	1116	2805	0	0	0	0
1	4	13	""	"iYGL068W"	3030	15650	110	893	838	412	80	90	71	93	86	0	2136	1858	949	89	101	155	91	82	0	0	0	0	0	0	0	0	0	0	0	0	0	0	0	0	0	0	0	0.397	0.428	0.436	0.490	2.419	0.413	0.846	0.000	0.000	0.000	0.000	0.000	0.000	0.000	0.000	0.000	0.000	0.000	0.000	0.000	0.000	80	500	2860	2527	-1.332	Error	Error	813	2047	0	0	758	1769	0	0	0	0
1	5	13	""	"iYGL064C"	3210	15660	100	948	881	285	84	91	48	98	97	0	2718	2453	957	92	101	62	97	95	0	0	0	0	0	0	0	0	0	0	0	0	0	0	0	0	0	0	0	0.329	0.338	0.353	0.369	1.656	0.310	0.876	0.000	0.000	0.000	0.000	0.000	0.000	0.000	0.000	0.000	0.000	0.000	0.000	0.000	0.000	80	489	3490	3158	-1.604	Error	Error	864	2626	0	0	797	2361	0	0	0	0
1	6	13	""	"iYGL060W"	3420	15650	110	2108	1805	981	86	94	49	97	92	0	3017	2544	1386	92	107	124	86	85	0	0	0	0	0	0	0	0	0	0	0	0	0	0	0	0	0	0	0	0.691	0.701	0.712	0.840	2.315	0.698	0.916	0.000	0.000	0.000	0.000	0.000	0.000	0.000	0.000	0.000	0.000	0.000	0.000	0.000	0.000	80	534	4947	4171	-0.533	Error	Error	2022	2925	0	0	1719	2452	0	0	0	0
1	7	13	""	"iYGLWdelta10"	3600	15660	110	2435	2342	945	90	96	49	100	100	0	5598	5219	2367	93	104	64	98	97	0	0	0	0	0	0	0	0	0	0	0	0	0	0	0	0	0	0	0	0.426	0.439	0.449	0.505	1.877	0.417	0.900	0.000	0.000	0.000	0.000	0.000	0.000	0.000	0.000	0.000	0.000	0.000	0.000	0.000	0.000	80	516	7850	7378	-1.231	Error	Error	2345	5505	0	0	2252	5126	0	0	0	0
1	8	13	""	"iYGL042C"	3790	15670	110	5390	4635	2141	90	99	52	98	98	0	2953	2431	1419	94	104	64	87	85	0	0	0	0	0	0	0	0	0	0	0	0	0	0	0	0	0	0	0	1.854	1.945	1.902	2.469	2.247	1.868	0.892	0.000	0.000	0.000	0.000	0.000	0.000	0.000	0.000	0.000	0.000	0.000	0.000	0.000	0.000	80	515	8159	6882	0.890	Error	Error	5300	2859	0	0	4545	2337	0	0	0	0
1	9	13	""	"itL(CAA)G2"	3970	15660	110	3418	3250	1043	96	133	190	100	100	0	3632	3417	1351	98	168	393	95	92	0	0	0	0	0	0	0	0	0	0	0	0	0	0	0	0	0	0	0	0.940	0.950	0.920	1.014	1.485	0.910	0.883	0.000	0.000	0.000	0.000	0.000	0.000	0.000	0.000	0.000	0.000	0.000	0.000	0.000	0.000	80	544	6856	6473	-0.089	Error	Error	3322	3534	0	0	3154	3319	0	0	0	0
1	10	13	""	"iYGL026C"	4190	15660	110	1517	1229	737	91	139	251	77	71	0	3367	2631	1612	102	178	446	75	72	0	0	0	0	0	0	0	0	0	0	0	0	0	0	0	0	0	0	0	0.437	0.450	0.445	0.452	1.956	0.442	0.898	0.000	0.000	0.000	0.000	0.000	0.000	0.000	0.000	0.000	0.000	0.000	0.000	0.000	0.000	80	542	4691	3667	-1.195	Error	Error	1426	3265	0	0	1138	2529	0	0	0	0
1	11	13	""	"iYGL021W"	4360	15660	110	975	832	472	89	95	38	90	88	0	715	618	379	98	107	47	80	76	0	0	0	0	0	0	0	0	0	0	0	0	0	0	0	0	0	0	0	1.436	1.429	1.365	1.321	1.775	1.369	0.809	0.000	0.000	0.000	0.000	0.000	0.000	0.000	0.000	0.000	0.000	0.000	0.000	0.000	0.000	80	501	1503	1263	0.522	Error	Error	886	617	0	0	743	520	0	0	0	0
1	12	13	""	"iYGL017W"	4540	15660	110	1007	941	350	94	105	59	98	96	0	2103	1864	820	99	128	185	93	91	0	0	0	0	0	0	0	0	0	0	0	0	0	0	0	0	0	0	0	0.456	0.480	0.476	0.524	1.814	0.438	0.877	0.000	0.000	0.000	0.000	0.000	0.000	0.000	0.000	0.000	0.000	0.000	0.000	0.000	0.000	80	544	2917	2612	-1.134	Error	Error	913	2004	0	0	847	1765	0	0	0	0
1	13	13	""	"iYGR269W"	4760	15650	110	615	617	357	95	115	134	77	67	0	1717	1556	1043	100	135	197	77	72	0	0	0	0	0	0	0	0	0	0	0	0	0	0	0	0	0	0	0	0.322	0.359	0.371	0.439	2.209	0.329	0.830	0.000	0.000	0.000	0.000	0.000	0.000	0.000	0.000	0.000	0.000	0.000	0.000	0.000	0.000	80	555	2137	1978	-1.637	Error	Error	520	1617	0	0	522	1456	0	0	0	0
1	14	13	""	"iYGR273C"	4960	15650	110	5448	5226	3823	92	111	138	97	88	0	2020	1998	1418	97	117	148	80	80	0	0	0	0	0	0	0	0	0	0	0	0	0	0	0	0	0	0	0	2.785	2.701	2.709	2.697	1.901	2.829	0.883	0.000	0.000	0.000	0.000	0.000	0.000	0.000	0.000	0.000	0.000	0.000	0.000	0.000	0.000	80	496	7279	7035	1.478	Error	Error	5356	1923	0	0	5134	1901	0	0	0	0
1	15	13	""	"iYGR277C"	5140	15660	120	1122	906	575	90	98	76	84	75	0	3143	2482	1699	95	113	207	75	73	0	0	0	0	0	0	0	0	0	0	0	0	0	0	0	0	0	0	0	0.339	0.342	0.333	0.402	2.459	0.320	0.867	0.000	0.000	0.000	0.000	0.000	0.000	0.000	0.000	0.000	0.000	0.000	0.000	0.000	0.000	120	535	4080	3203	-1.562	Error	Error	1032	3048	0	0	816	2387	0	0	0	0
1	16	13	""	"iYGR292W-0"	5330	15660	120	990	988	753	91	99	59	85	80	0	2635	2459	2158	94	102	35	83	80	0	0	0	0	0	0	0	0	0	0	0	0	0	0	0	0	0	0	0	0.354	0.379	0.398	0.460	2.449	0.344	0.860	0.000	0.000	0.000	0.000	0.000	0.000	0.000	0.000	0.000	0.000	0.000	0.000	0.000	0.000	120	502	3440	3262	-1.499	Error	Error	899	2541	0	0	897	2365	0	0	0	0
1	17	13	""	"iYGR295C-1"	5520	15660	120	17984	19413	13613	105	227	799	92	88	0	8190	8955	7017	106	190	581	85	81	0	0	0	0	0	0	0	0	0	0	0	0	0	0	0	0	0	0	0	2.212	2.182	2.211	2.675	2.231	2.112	0.888	0.000	0.000	0.000	0.000	0.000	0.000	0.000	0.000	0.000	0.000	0.000	0.000	0.000	0.000	120	556	25963	28157	1.145	Error	Error	17879	8084	0	0	19308	8849	0	0	0	0
1	18	13	""	"iYHL048W"	5700	15650	110	2683	3083	2504	117	134	104	88	82	0	1276	1413	1179	107	118	57	78	76	0	0	0	0	0	0	0	0	0	0	0	0	0	0	0	0	0	0	0	2.195	2.271	2.154	2.094	2.242	2.300	0.846	0.000	0.000	0.000	0.000	0.000	0.000	0.000	0.000	0.000	0.000	0.000	0.000	0.000	0.000	80	478	3735	4272	1.134	Error	Error	2566	1169	0	0	2966	1306	0	0	0	0
1	19	13	""	"iYHL034C"	5900	15670	110	479	593	577	107	289	1836	2	1	0	852	980	1136	104	195	910	41	8	0	0	0	0	0	0	0	0	0	0	0	0	0	0	0	0	0	0	0	0.497	0.555	0.572	0.619	2.423	0.487	0.821	0.000	0.000	0.000	0.000	0.000	0.000	0.000	0.000	0.000	0.000	0.000	0.000	0.000	0.000	80	533	1120	1362	-1.008	Error	Error	372	748	0	0	486	876	0	0	0	0
1	20	13	""	"iYHL030W"	6080	15660	110	6188	5312	2715	95	115	113	97	93	0	1732	1463	838	96	119	155	82	80	0	0	0	0	0	0	0	0	0	0	0	0	0	0	0	0	0	0	0	3.724	3.816	3.735	4.190	1.874	3.690	0.874	0.000	0.000	0.000	0.000	0.000	0.000	0.000	0.000	0.000	0.000	0.000	0.000	0.000	0.000	80	475	7729	6584	1.897	Error	Error	6093	1636	0	0	5217	1367	0	0	0	0
1	21	13	""	"iYHL026C"	6250	15660	110	2301	2336	1732	95	180	424	75	73	0	3034	3133	2767	96	240	692	72	67	0	0	0	0	0	0	0	0	0	0	0	0	0	0	0	0	0	0	0	0.751	0.738	0.748	0.854	2.026	0.660	0.851	0.000	0.000	0.000	0.000	0.000	0.000	0.000	0.000	0.000	0.000	0.000	0.000	0.000	0.000	80	503	5144	5278	-0.413	Error	Error	2206	2938	0	0	2241	3037	0	0	0	0
1	22	13	""	"iYHL011C"	6470	15660	120	1632	1448	996	92	157	359	74	65	0	3094	2474	1824	98	230	638	68	64	0	0	0	0	0	0	0	0	0	0	0	0	0	0	0	0	0	0	0	0.514	0.571	0.553	0.688	2.330	0.537	0.870	0.000	0.000	0.000	0.000	0.000	0.000	0.000	0.000	0.000	0.000	0.000	0.000	0.000	0.000	120	683	4536	3732	-0.960	Error	Error	1540	2996	0	0	1356	2376	0	0	0	0
1	1	14	""	"iYHLWdelta2"	2460	15850	110	587	685	518	80	123	299	71	36	0	361	400	288	83	107	209	65	28	0	0	0	0	0	0	0	0	0	0	0	0	0	0	0	0	0	0	0	1.824	1.909	1.801	1.824	1.872	1.876	0.798	0.000	0.000	0.000	0.000	0.000	0.000	0.000	0.000	0.000	0.000	0.000	0.000	0.000	0.000	80	589	785	922	0.867	Error	Error	507	278	0	0	605	317	0	0	0	0
1	2	14	""	"iYHL003C"	2670	15860	110	3070	2830	1927	83	138	323	80	78	0	2779	2424	1764	87	134	335	76	75	0	0	0	0	0	0	0	0	0	0	0	0	0	0	0	0	0	0	0	1.110	1.175	1.166	1.366	2.227	1.130	0.887	0.000	0.000	0.000	0.000	0.000	0.000	0.000	0.000	0.000	0.000	0.000	0.000	0.000	0.000	80	565	5679	5084	0.150	Error	Error	2987	2692	0	0	2747	2337	0	0	0	0
1	3	14	""	"iYIL106W"	2860	15850	110	3940	3218	1922	87	116	142	88	83	0	1690	1339	892	89	127	263	72	70	0	0	0	0	0	0	0	0	0	0	0	0	0	0	0	0	0	0	0	2.407	2.505	2.447	2.584	2.498	2.431	0.882	0.000	0.000	0.000	0.000	0.000	0.000	0.000	0.000	0.000	0.000	0.000	0.000	0.000	0.000	80	522	5454	4381	1.267	Error	Error	3853	1601	0	0	3131	1250	0	0	0	0
1	4	14	""	"iYIL103W-1"	3060	15860	110	1394	1253	867	85	113	150	78	73	0	3182	2987	2399	91	134	302	75	72	0	0	0	0	0	0	0	0	0	0	0	0	0	0	0	0	0	0	0	0.423	0.403	0.417	0.499	2.487	0.372	0.723	0.000	0.000	0.000	0.000	0.000	0.000	0.000	0.000	0.000	0.000	0.000	0.000	0.000	0.000	80	517	4400	4064	-1.240	Error	Error	1309	3091	0	0	1168	2896	0	0	0	0
1	5	14	""	"iYIL100W"	3240	15860	110	1146	1002	567	90	99	56	87	82	0	1661	1433	916	94	102	59	82	80	0	0	0	0	0	0	0	0	0	0	0	0	0	0	0	0	0	0	0	0.674	0.681	0.699	0.759	2.095	0.619	0.861	0.000	0.000	0.000	0.000	0.000	0.000	0.000	0.000	0.000	0.000	0.000	0.000	0.000	0.000	80	485	2623	2251	-0.569	Error	Error	1056	1567	0	0	912	1339	0	0	0	0
1	6	14	""	"iYIL088C"	3420	15850	110	1890	1540	960	92	98	51	90	86	0	2838	2179	1560	92	108	95	80	80	0	0	0	0	0	0	0	0	0	0	0	0	0	0	0	0	0	0	0	0.655	0.694	0.678	0.795	2.082	0.638	0.886	0.000	0.000	0.000	0.000	0.000	0.000	0.000	0.000	0.000	0.000	0.000	0.000	0.000	0.000	80	509	4544	3535	-0.611	Error	Error	1798	2746	0	0	1448	2087	0	0	0	0
1	7	14	""	"itI(AAU)I2"	3610	15850	110	1350	1069	595	94	114	109	88	77	0	1473	1197	727	92	124	166	77	76	0	0	0	0	0	0	0	0	0	0	0	0	0	0	0	0	0	0	0	0.909	0.882	0.869	0.990	2.115	0.849	0.865	0.000	0.000	0.000	0.000	0.000	0.000	0.000	0.000	0.000	0.000	0.000	0.000	0.000	0.000	80	548	2637	2080	-0.137	Error	Error	1256	1381	0	0	975	1105	0	0	0	0
1	8	14	""	"iYIL076W"	3810	15850	110	7847	7176	4422	97	148	376	92	86	0	1561	1409	889	92	127	195	78	77	0	0	0	0	0	0	0	0	0	0	0	0	0	0	0	0	0	0	0	5.276	5.375	5.287	5.786	1.882	5.392	0.899	0.000	0.000	0.000	0.000	0.000	0.000	0.000	0.000	0.000	0.000	0.000	0.000	0.000	0.000	80	531	9219	8396	2.399	Error	Error	7750	1469	0	0	7079	1317	0	0	0	0
1	9	14	""	"iYIL057C"	4000	15850	110	1609	1527	729	99	145	375	85	80	0	2436	2105	1056	95	128	198	92	86	0	0	0	0	0	0	0	0	0	0	0	0	0	0	0	0	0	0	0	0.645	0.710	0.691	0.733	1.943	0.683	0.869	0.000	0.000	0.000	0.000	0.000	0.000	0.000	0.000	0.000	0.000	0.000	0.000	0.000	0.000	80	534	3851	3438	-0.633	Error	Error	1510	2341	0	0	1428	2010	0	0	0	0
1	10	14	""	"iYIL054W"	4190	15860	110	552	511	261	90	96	43	91	85	0	1046	867	507	98	106	43	81	78	0	0	0	0	0	0	0	0	0	0	0	0	0	0	0	0	0	0	0	0.487	0.547	0.539	0.577	1.952	0.498	0.817	0.000	0.000	0.000	0.000	0.000	0.000	0.000	0.000	0.000	0.000	0.000	0.000	0.000	0.000	80	499	1410	1190	-1.037	Error	Error	462	948	0	0	421	769	0	0	0	0
1	11	14	""	"iYIL050W"	4380	15860	110	538	570	353	90	117	275	66	42	0	1731	1462	1047	100	151	496	66	62	0	0	0	0	0	0	0	0	0	0	0	0	0	0	0	0	0	0	0	0.275	0.352	0.354	0.387	2.459	0.313	0.841	0.000	0.000	0.000	0.000	0.000	0.000	0.000	0.000	0.000	0.000	0.000	0.000	0.000	0.000	80	526	2079	1842	-1.864	Error	Error	448	1631	0	0	480	1362	0	0	0	0
1	12	14	""	"iYIL034C"	4570	15850	110	1690	1545	1021	96	107	72	85	80	0	3895	3311	2325	103	153	324	75	72	0	0	0	0	0	0	0	0	0	0	0	0	0	0	0	0	0	0	0	0.420	0.452	0.456	0.480	2.017	0.429	0.883	0.000	0.000	0.000	0.000	0.000	0.000	0.000	0.000	0.000	0.000	0.000	0.000	0.000	0.000	80	508	5386	4657	-1.250	Error	Error	1594	3792	0	0	1449	3208	0	0	0	0
1	13	14	""	"iYIL030C"	4740	15850	110	963	781	495	101	129	136	72	66	0	1612	1349	947	108	194	399	67	63	0	0	0	0	0	0	0	0	0	0	0	0	0	0	0	0	0	0	0	0.573	0.548	0.533	0.628	2.492	0.481	0.798	0.000	0.000	0.000	0.000	0.000	0.000	0.000	0.000	0.000	0.000	0.000	0.000	0.000	0.000	80	497	2366	1921	-0.803	Error	Error	862	1504	0	0	680	1241	0	0	0	0
1	14	14	""	"iYIL028W"	4930	15850	110	6029	6154	4202	103	194	578	83	82	0	4410	4453	3173	106	228	643	77	77	0	0	0	0	0	0	0	0	0	0	0	0	0	0	0	0	0	0	0	1.377	1.392	1.381	1.654	2.357	1.351	0.902	0.000	0.000	0.000	0.000	0.000	0.000	0.000	0.000	0.000	0.000	0.000	0.000	0.000	0.000	80	551	10230	10398	0.461	Error	Error	5926	4304	0	0	6051	4347	0	0	0	0
1	15	14	""	"iYJL006C"	5150	15840	110	461	417	188	94	137	395	45	0	0	534	473	229	93	151	472	40	1	0	0	0	0	0	0	0	0	0	0	0	0	0	0	0	0	0	0	0	0.832	0.850	0.915	0.893	1.856	0.865	0.785	0.000	0.000	0.000	0.000	0.000	0.000	0.000	0.000	0.000	0.000	0.000	0.000	0.000	0.000	80	498	808	703	-0.265	Error	Error	367	441	0	0	323	380	0	0	0	0
1	16	14	""	"iYJL003W"	5330	15850	120	2242	2137	1656	91	99	56	89	83	0	1044	1079	890	91	106	108	69	64	0	0	0	0	0	0	0	0	0	0	0	0	0	0	0	0	0	0	0	2.257	2.071	1.996	2.133	2.759	2.001	0.866	0.000	0.000	0.000	0.000	0.000	0.000	0.000	0.000	0.000	0.000	0.000	0.000	0.000	0.000	120	577	3104	3034	1.174	Error	Error	2151	953	0	0	2046	988	0	0	0	0
1	17	14	""	"iYJR001W"	5530	15860	110	2883	2200	1387	95	113	96	91	82	0	2250	1642	1125	98	121	160	73	71	0	0	0	0	0	0	0	0	0	0	0	0	0	0	0	0	0	0	0	1.296	1.363	1.341	1.553	2.057	1.354	0.890	0.000	0.000	0.000	0.000	0.000	0.000	0.000	0.000	0.000	0.000	0.000	0.000	0.000	0.000	80	443	4940	3649	0.374	Error	Error	2788	2152	0	0	2105	1544	0	0	0	0
1	18	14	""	"iYJR015W"	5700	15850	120	1675	1655	1337	99	120	116	77	72	0	373	375	296	98	142	300	48	10	0	0	0	0	0	0	0	0	0	0	0	0	0	0	0	0	0	0	0	5.731	5.617	4.950	4.176	2.829	5.164	0.590	0.000	0.000	0.000	0.000	0.000	0.000	0.000	0.000	0.000	0.000	0.000	0.000	0.000	0.000	120	560	1851	1833	2.519	Error	Error	1576	275	0	0	1556	277	0	0	0	0
1	19	14	""	"iYJR021C"	5890	15850	110	864	711	512	94	105	57	72	66	0	860	728	524	95	113	102	68	67	0	0	0	0	0	0	0	0	0	0	0	0	0	0	0	0	0	0	0	1.007	0.975	0.903	0.927	2.403	0.925	0.815	0.000	0.000	0.000	0.000	0.000	0.000	0.000	0.000	0.000	0.000	0.000	0.000	0.000	0.000	80	493	1535	1250	0.009	Error	Error	770	765	0	0	617	633	0	0	0	0
1	20	14	""	"iYJR031C"	6080	15850	110	922	928	352	94	154	231	96	81	0	2319	2034	839	97	261	606	92	77	0	0	0	0	0	0	0	0	0	0	0	0	0	0	0	0	0	0	0	0.373	0.431	0.429	0.444	1.536	0.402	0.871	0.000	0.000	0.000	0.000	0.000	0.000	0.000	0.000	0.000	0.000	0.000	0.000	0.000	0.000	80	511	3050	2771	-1.424	Error	Error	828	2222	0	0	834	1937	0	0	0	0
1	21	14	""	"itS(AGA)J"	6260	15850	110	2608	2247	1486	103	254	506	76	68	0	2612	2207	1580	102	397	839	67	61	0	0	0	0	0	0	0	0	0	0	0	0	0	0	0	0	0	0	0	0.998	1.019	1.048	1.300	2.699	0.888	0.821	0.000	0.000	0.000	0.000	0.000	0.000	0.000	0.000	0.000	0.000	0.000	0.000	0.000	0.000	80	518	5015	4249	-0.003	Error	Error	2505	2510	0	0	2144	2105	0	0	0	0
1	22	14	""	"iYJR050W"	6470	15860	110	1198	1034	752	97	176	351	67	56	0	2561	2499	2123	104	234	538	67	58	0	0	0	0	0	0	0	0	0	0	0	0	0	0	0	0	0	0	0	0.448	0.391	0.397	0.438	1.924	0.357	0.871	0.000	0.000	0.000	0.000	0.000	0.000	0.000	0.000	0.000	0.000	0.000	0.000	0.000	0.000	80	554	3558	3332	-1.158	Error	Error	1101	2457	0	0	937	2395	0	0	0	0
1	1	15	""	"iYJR052W"	2460	16040	110	575	536	260	78	87	57	88	83	0	1016	898	456	86	105	107	85	81	0	0	0	0	0	0	0	0	0	0	0	0	0	0	0	0	0	0	0	0.534	0.564	0.548	0.618	2.522	0.517	0.803	0.000	0.000	0.000	0.000	0.000	0.000	0.000	0.000	0.000	0.000	0.000	0.000	0.000	0.000	80	526	1427	1270	-0.904	Error	Error	497	930	0	0	458	812	0	0	0	0
1	2	15	""	"iYJR063W"	2630	16040	110	1243	1201	857	87	130	222	75	67	0	3635	3355	2875	92	250	786	66	58	0	0	0	0	0	0	0	0	0	0	0	0	0	0	0	0	0	0	0	0.326	0.341	0.358	0.513	3.459	0.286	0.841	0.000	0.000	0.000	0.000	0.000	0.000	0.000	0.000	0.000	0.000	0.000	0.000	0.000	0.000	80	502	4699	4377	-1.616	Error	Error	1156	3543	0	0	1114	3263	0	0	0	0
1	3	15	""	"iYJR067C"	2840	16040	120	2683	2168	1469	93	133	217	80	69	0	1396	1161	842	96	221	726	60	47	0	0	0	0	0	0	0	0	0	0	0	0	0	0	0	0	0	0	0	1.992	1.948	1.908	1.966	2.453	1.890	0.858	0.000	0.000	0.000	0.000	0.000	0.000	0.000	0.000	0.000	0.000	0.000	0.000	0.000	0.000	120	582	3890	3140	0.994	Error	Error	2590	1300	0	0	2075	1065	0	0	0	0
1	4	15	""	"iYJR072C"	3040	16040	130	310	286	139	94	108	87	72	57	0	572	534	282	94	106	86	80	78	0	0	0	0	0	0	0	0	0	0	0	0	0	0	0	0	0	0	0	0.452	0.436	0.436	0.445	1.987	0.480	0.523	0.000	0.000	0.000	0.000	0.000	0.000	0.000	0.000	0.000	0.000	0.000	0.000	0.000	0.000	120	562	694	632	-1.146	Error	Error	216	478	0	0	192	440	0	0	0	0
1	5	15	""	"itV(AAC)K2"	3230	16040	120	13660	11331	4865	99	115	80	100	100	0	4231	3443	1705	95	104	44	95	94	0	0	0	0	0	0	0	0	0	0	0	0	0	0	0	0	0	0	0	3.279	3.355	3.307	3.790	1.839	3.243	0.904	0.000	0.000	0.000	0.000	0.000	0.000	0.000	0.000	0.000	0.000	0.000	0.000	0.000	0.000	120	502	17697	14580	1.713	Error	Error	13561	4136	0	0	11232	3348	0	0	0	0
1	6	15	""	"iYKL027W"	3410	16040	120	7821	7013	5155	101	147	220	87	81	0	2424	2026	1631	94	130	195	70	69	0	0	0	0	0	0	0	0	0	0	0	0	0	0	0	0	0	0	0	3.313	3.578	3.415	3.508	2.027	3.569	0.854	0.000	0.000	0.000	0.000	0.000	0.000	0.000	0.000	0.000	0.000	0.000	0.000	0.000	0.000	120	551	10050	8844	1.728	Error	Error	7720	2330	0	0	6912	1932	0	0	0	0
1	7	15	""	"iYKL023W"	3620	16050	110	889	935	700	95	150	243	67	61	0	654	855	760	89	128	206	58	51	0	0	0	0	0	0	0	0	0	0	0	0	0	0	0	0	0	0	0	1.405	1.097	1.007	1.198	3.094	0.997	0.836	0.000	0.000	0.000	0.000	0.000	0.000	0.000	0.000	0.000	0.000	0.000	0.000	0.000	0.000	80	469	1359	1606	0.491	Error	Error	794	565	0	0	840	766	0	0	0	0
1	8	15	""	"iYKL007W"	3770	16040	110	2952	2365	1457	97	137	244	81	77	0	1683	1315	815	91	121	180	76	72	0	0	0	0	0	0	0	0	0	0	0	0	0	0	0	0	0	0	0	1.793	1.853	1.811	1.877	2.076	1.905	0.862	0.000	0.000	0.000	0.000	0.000	0.000	0.000	0.000	0.000	0.000	0.000	0.000	0.000	0.000	80	468	4447	3492	0.843	Error	Error	2855	1592	0	0	2268	1224	0	0	0	0
1	9	15	""	"iYKL004W"	3960	16040	110	6885	5921	2304	101	165	352	98	98	0	2556	2244	963	94	140	239	93	91	0	0	0	0	0	0	0	0	0	0	0	0	0	0	0	0	0	0	0	2.755	2.707	2.659	2.885	1.701	2.695	0.910	0.000	0.000	0.000	0.000	0.000	0.000	0.000	0.000	0.000	0.000	0.000	0.000	0.000	0.000	80	524	9246	7970	1.462	Error	Error	6784	2462	0	0	5820	2150	0	0	0	0
1	10	15	""	"iCEN11"	4170	16040	120	4545	3884	1807	98	134	278	96	93	0	1308	1145	577	100	126	175	84	80	0	0	0	0	0	0	0	0	0	0	0	0	0	0	0	0	0	0	0	3.681	3.623	3.610	3.957	1.855	3.706	0.894	0.000	0.000	0.000	0.000	0.000	0.000	0.000	0.000	0.000	0.000	0.000	0.000	0.000	0.000	120	527	5655	4831	1.880	Error	Error	4447	1208	0	0	3786	1045	0	0	0	0
1	11	15	""	"iYKR015C"	4320	16030	110	3845	3430	2246	97	227	702	72	71	0	4491	4051	2890	107	317	1034	72	65	0	0	0	0	0	0	0	0	0	0	0	0	0	0	0	0	0	0	0	0.855	0.845	0.870	0.957	2.228	0.783	0.838	0.000	0.000	0.000	0.000	0.000	0.000	0.000	0.000	0.000	0.000	0.000	0.000	0.000	0.000	80	447	8132	7277	-0.226	Error	Error	3748	4384	0	0	3333	3944	0	0	0	0
1	12	15	""	"iYKR019C"	4530	16040	110	1285	1150	552	101	209	633	77	45	0	3101	2547	1374	108	306	934	77	67	0	0	0	0	0	0	0	0	0	0	0	0	0	0	0	0	0	0	0	0.396	0.430	0.416	0.476	1.979	0.403	0.858	0.000	0.000	0.000	0.000	0.000	0.000	0.000	0.000	0.000	0.000	0.000	0.000	0.000	0.000	80	518	4177	3488	-1.338	Error	Error	1184	2993	0	0	1049	2439	0	0	0	0
1	13	15	""	"iYKR023W"	4720	16040	120	4567	3707	2400	104	122	103	94	86	0	1017	846	540	108	169	341	65	62	0	0	0	0	0	0	0	0	0	0	0	0	0	0	0	0	0	0	0	4.910	4.882	4.744	4.848	1.816	4.998	0.668	0.000	0.000	0.000	0.000	0.000	0.000	0.000	0.000	0.000	0.000	0.000	0.000	0.000	0.000	120	519	5372	4341	2.296	Error	Error	4463	909	0	0	3603	738	0	0	0	0
1	14	15	""	"iYKRCdelta11"	4900	16040	120	1041	982	631	104	135	372	73	55	0	2802	2691	1984	105	140	353	75	74	0	0	0	0	0	0	0	0	0	0	0	0	0	0	0	0	0	0	0	0.347	0.340	0.343	0.432	2.657	0.302	0.817	0.000	0.000	0.000	0.000	0.000	0.000	0.000	0.000	0.000	0.000	0.000	0.000	0.000	0.000	120	499	3634	3464	-1.525	Error	Error	937	2697	0	0	878	2586	0	0	0	0
1	15	15	""	"iYKR042W"	5090	16040	120	1712	1664	1205	98	120	336	71	66	0	1147	1007	735	96	123	313	68	65	0	0	0	0	0	0	0	0	0	0	0	0	0	0	0	0	0	0	0	1.536	1.719	1.644	1.762	2.348	1.732	0.875	0.000	0.000	0.000	0.000	0.000	0.000	0.000	0.000	0.000	0.000	0.000	0.000	0.000	0.000	120	599	2665	2477	0.619	Error	Error	1614	1051	0	0	1566	911	0	0	0	0
1	16	15	""	"iYKR046C"	5290	16050	110	1198	1008	548	90	98	55	91	86	0	1506	1247	767	95	114	135	80	76	0	0	0	0	0	0	0	0	0	0	0	0	0	0	0	0	0	0	0	0.785	0.797	0.775	0.956	2.402	0.735	0.874	0.000	0.000	0.000	0.000	0.000	0.000	0.000	0.000	0.000	0.000	0.000	0.000	0.000	0.000	80	504	2519	2070	-0.349	Error	Error	1108	1411	0	0	918	1152	0	0	0	0
1	17	15	""	"iYLR167W"	5500	16040	120	463	425	190	90	102	78	85	76	0	697	598	300	94	139	463	66	1	0	0	0	0	0	0	0	0	0	0	0	0	0	0	0	0	0	0	0	0.619	0.665	0.660	0.653	2.350	0.152	0.174	0.000	0.000	0.000	0.000	0.000	0.000	0.000	0.000	0.000	0.000	0.000	0.000	0.000	0.000	120	566	976	839	-0.693	Error	Error	373	603	0	0	335	504	0	0	0	0
1	18	15	""	"iYLR173W"	5660	16040	110	819	785	572	92	118	144	70	63	0	1983	1659	1439	97	171	408	61	57	0	0	0	0	0	0	0	0	0	0	0	0	0	0	0	0	0	0	0	0.385	0.444	0.456	0.641	3.284	0.375	0.843	0.000	0.000	0.000	0.000	0.000	0.000	0.000	0.000	0.000	0.000	0.000	0.000	0.000	0.000	80	441	2613	2255	-1.375	Error	Error	727	1886	0	0	693	1562	0	0	0	0
1	19	15	""	"iYLR177W"	5840	16030	110	814	872	694	95	127	160	70	67	0	586	588	470	96	173	391	56	22	0	0	0	0	0	0	0	0	0	0	0	0	0	0	0	0	0	0	0	1.467	1.579	1.408	1.215	2.259	1.169	0.515	0.000	0.000	0.000	0.000	0.000	0.000	0.000	0.000	0.000	0.000	0.000	0.000	0.000	0.000	80	510	1209	1269	0.553	Error	Error	719	490	0	0	777	492	0	0	0	0
1	20	15	""	"iYLR193C"	6030	16030	110	876	821	553	98	131	175	70	66	0	1855	1569	1201	98	176	378	68	60	0	0	0	0	0	0	0	0	0	0	0	0	0	0	0	0	0	0	0	0.443	0.492	0.470	0.569	2.658	0.451	0.862	0.000	0.000	0.000	0.000	0.000	0.000	0.000	0.000	0.000	0.000	0.000	0.000	0.000	0.000	80	546	2535	2194	-1.175	Error	Error	778	1757	0	0	723	1471	0	0	0	0
1	21	15	""	"iYLR198C"	6250	16040	120	1794	1675	770	102	160	314	90	82	0	621	549	271	104	245	606	29	0	0	0	0	0	0	0	0	0	0	0	0	0	0	0	0	0	0	0	0	3.273	3.535	3.543	3.917	2.007	3.577	0.835	0.000	0.000	0.000	0.000	0.000	0.000	0.000	0.000	0.000	0.000	0.000	0.000	0.000	0.000	120	584	2209	2018	1.710	Error	Error	1692	517	0	0	1573	445	0	0	0	0
1	22	15	""	"iYLR204W"	6410	16030	110	543	525	335	99	127	210	65	52	0	1331	1209	883	108	168	347	66	62	0	0	0	0	0	0	0	0	0	0	0	0	0	0	0	0	0	0	0	0.363	0.387	0.408	0.443	2.560	0.341	0.815	0.000	0.000	0.000	0.000	0.000	0.000	0.000	0.000	0.000	0.000	0.000	0.000	0.000	0.000	80	488	1667	1527	-1.462	Error	Error	444	1223	0	0	426	1101	0	0	0	0
1	1	16	""	"iYLR221C"	2420	16220	110	2196	1993	1492	78	113	216	73	70	0	1369	1246	999	85	117	211	66	62	0	0	0	0	0	0	0	0	0	0	0	0	0	0	0	0	0	0	0	1.650	1.649	1.679	2.004	2.566	1.635	0.855	0.000	0.000	0.000	0.000	0.000	0.000	0.000	0.000	0.000	0.000	0.000	0.000	0.000	0.000	80	503	3402	3076	0.722	Error	Error	2118	1284	0	0	1915	1161	0	0	0	0
1	2	16	""	"iYLR225C"	2610	16230	110	698	723	490	86	134	241	72	58	0	1210	1134	861	91	211	968	56	13	0	0	0	0	0	0	0	0	0	0	0	0	0	0	0	0	0	0	0	0.547	0.611	0.568	0.636	2.434	0.552	0.841	0.000	0.000	0.000	0.000	0.000	0.000	0.000	0.000	0.000	0.000	0.000	0.000	0.000	0.000	80	542	1731	1680	-0.871	Error	Error	612	1119	0	0	637	1043	0	0	0	0
1	3	16	""	"iYLRWdelta11"	2810	16230	120	678	682	483	87	101	91	73	68	0	547	516	402	89	123	210	59	50	0	0	0	0	0	0	0	0	0	0	0	0	0	0	0	0	0	0	0	1.290	1.393	1.350	1.401	2.762	1.301	0.827	0.000	0.000	0.000	0.000	0.000	0.000	0.000	0.000	0.000	0.000	0.000	0.000	0.000	0.000	120	591	1049	1022	0.368	Error	Error	591	458	0	0	595	427	0	0	0	0
1	4	16	""	"iYLR244C"	3010	16230	120	413	387	192	86	95	70	80	74	0	576	488	280	90	97	45	79	75	0	0	0	0	0	0	0	0	0	0	0	0	0	0	0	0	0	0	0	0.673	0.756	0.736	0.712	2.139	0.712	0.776	0.000	0.000	0.000	0.000	0.000	0.000	0.000	0.000	0.000	0.000	0.000	0.000	0.000	0.000	120	527	813	699	-0.572	Error	Error	327	486	0	0	301	398	0	0	0	0
1	5	16	""	"iYLR247C"	3190	16220	100	598	721	631	90	100	73	71	63	0	2564	2745	2812	91	124	252	70	66	0	0	0	0	0	0	0	0	0	0	0	0	0	0	0	0	0	0	0	0.205	0.238	0.246	0.309	2.952	0.210	0.830	0.000	0.000	0.000	0.000	0.000	0.000	0.000	0.000	0.000	0.000	0.000	0.000	0.000	0.000	80	452	2981	3285	-2.283	Error	Error	508	2473	0	0	631	2654	0	0	0	0
1	6	16	""	"iYLR252W"	3400	16230	120	1225	1052	632	89	113	230	77	72	0	1564	1386	1008	91	130	349	70	62	0	0	0	0	0	0	0	0	0	0	0	0	0	0	0	0	0	0	0	0.771	0.744	0.716	0.825	2.901	0.678	0.824	0.000	0.000	0.000	0.000	0.000	0.000	0.000	0.000	0.000	0.000	0.000	0.000	0.000	0.000	120	616	2609	2258	-0.375	Error	Error	1136	1473	0	0	963	1295	0	0	0	0
1	7	16	""	"iYML046W"	3600	16220	110	434	391	225	89	99	69	73	67	0	484	432	281	87	97	67	71	70	0	0	0	0	0	0	0	0	0	0	0	0	0	0	0	0	0	0	0	0.869	0.875	0.829	0.810	2.354	0.858	0.794	0.000	0.000	0.000	0.000	0.000	0.000	0.000	0.000	0.000	0.000	0.000	0.000	0.000	0.000	80	519	742	647	-0.203	Error	Error	345	397	0	0	302	345	0	0	0	0
1	8	16	""	"iYML042W"	3790	16220	110	840	711	404	92	115	190	78	66	0	1237	972	608	91	111	135	72	72	0	0	0	0	0	0	0	0	0	0	0	0	0	0	0	0	0	0	0	0.653	0.703	0.709	0.679	2.333	0.662	0.834	0.000	0.000	0.000	0.000	0.000	0.000	0.000	0.000	0.000	0.000	0.000	0.000	0.000	0.000	80	508	1894	1500	-0.615	Error	Error	748	1146	0	0	619	881	0	0	0	0
1	9	16	""	"iYML038C"	3980	16230	120	236	275	138	91	147	355	12	0	0	349	380	222	95	129	245	51	16	0	0	0	0	0	0	0	0	0	0	0	0	0	0	0	0	0	0	0	0.571	0.646	0.627	0.645	2.268	0.562	0.637	0.000	0.000	0.000	0.000	0.000	0.000	0.000	0.000	0.000	0.000	0.000	0.000	0.000	0.000	120	631	399	469	-0.809	Error	Error	145	254	0	0	184	285	0	0	0	0
1	10	16	""	"iYML021C"	4190	16220	110	2305	2683	2309	94	141	351	70	65	0	3488	3934	3375	104	123	164	75	72	0	0	0	0	0	0	0	0	0	0	0	0	0	0	0	0	0	0	0	0.653	0.676	0.706	0.727	2.074	0.641	0.854	0.000	0.000	0.000	0.000	0.000	0.000	0.000	0.000	0.000	0.000	0.000	0.000	0.000	0.000	80	478	5595	6419	-0.614	Error	Error	2211	3384	0	0	2589	3830	0	0	0	0
1	11	16	""	"iYML017W"	4360	16230	120	1403	1413	1083	94	167	499	70	61	0	511	542	453	104	191	645	26	3	0	0	0	0	0	0	0	0	0	0	0	0	0	0	0	0	0	0	0	3.216	3.011	2.871	2.897	2.347	2.894	0.776	0.000	0.000	0.000	0.000	0.000	0.000	0.000	0.000	0.000	0.000	0.000	0.000	0.000	0.000	120	585	1716	1757	1.685	Error	Error	1309	407	0	0	1319	438	0	0	0	0
1	12	16	""	"iYML013C-A"	4560	16230	120	1173	1001	574	96	161	519	70	51	0	2422	2156	1353	105	154	325	79	75	0	0	0	0	0	0	0	0	0	0	0	0	0	0	0	0	0	0	0	0.465	0.441	0.442	0.511	2.714	0.423	0.878	0.000	0.000	0.000	0.000	0.000	0.000	0.000	0.000	0.000	0.000	0.000	0.000	0.000	0.000	120	570	3394	2956	-1.105	Error	Error	1077	2317	0	0	905	2051	0	0	0	0
1	13	16	""	"iYMR002W"	4750	16230	120	1003	914	518	93	105	87	92	85	0	740	668	400	102	119	196	72	66	0	0	0	0	0	0	0	0	0	0	0	0	0	0	0	0	0	0	0	1.426	1.451	1.429	1.547	2.172	1.237	0.629	0.000	0.000	0.000	0.000	0.000	0.000	0.000	0.000	0.000	0.000	0.000	0.000	0.000	0.000	120	510	1548	1387	0.512	Error	Error	910	638	0	0	821	566	0	0	0	0
1	14	16	""	"iYMR006C"	4930	16230	120	5285	4238	2403	92	112	171	95	89	0	1901	1556	975	99	126	256	77	73	0	0	0	0	0	0	0	0	0	0	0	0	0	0	0	0	0	0	0	2.882	2.846	2.710	3.094	2.190	2.786	0.872	0.000	0.000	0.000	0.000	0.000	0.000	0.000	0.000	0.000	0.000	0.000	0.000	0.000	0.000	120	548	6995	5603	1.527	Error	Error	5193	1802	0	0	4146	1457	0	0	0	0
1	15	16	""	"iYMR010W-0"	5130	16230	110	2275	2051	950	91	213	1211	80	33	0	1921	1738	816	95	199	808	82	61	0	0	0	0	0	0	0	0	0	0	0	0	0	0	0	0	0	0	0	1.196	1.193	1.175	1.221	1.757	1.392	0.911	0.000	0.000	0.000	0.000	0.000	0.000	0.000	0.000	0.000	0.000	0.000	0.000	0.000	0.000	80	504	4010	3603	0.258	Error	Error	2184	1826	0	0	1960	1643	0	0	0	0
1	16	16	""	"iYMR021C"	5320	16230	120	2957	2509	1088	88	192	1137	81	66	0	1961	1725	810	94	174	718	80	70	0	0	0	0	0	0	0	0	0	0	0	0	0	0	0	0	0	0	0	1.537	1.484	1.446	1.595	1.929	1.434	0.902	0.000	0.000	0.000	0.000	0.000	0.000	0.000	0.000	0.000	0.000	0.000	0.000	0.000	0.000	120	567	4736	4052	0.620	Error	Error	2869	1867	0	0	2421	1631	0	0	0	0
1	17	16	""	"iYMR024W"	5510	16240	110	1512	1214	649	89	114	137	86	78	0	1933	1534	937	97	158	518	73	63	0	0	0	0	0	0	0	0	0	0	0	0	0	0	0	0	0	0	0	0.775	0.783	0.768	0.867	2.378	0.571	0.623	0.000	0.000	0.000	0.000	0.000	0.000	0.000	0.000	0.000	0.000	0.000	0.000	0.000	0.000	80	495	3259	2562	-0.368	Error	Error	1423	1836	0	0	1125	1437	0	0	0	0
1	18	16	""	"iYMR029C"	5690	16230	110	4039	4031	2399	93	142	313	92	88	0	3993	3521	2138	99	187	471	86	78	0	0	0	0	0	0	0	0	0	0	0	0	0	0	0	0	0	0	0	1.013	1.151	1.127	1.235	1.985	1.127	0.891	0.000	0.000	0.000	0.000	0.000	0.000	0.000	0.000	0.000	0.000	0.000	0.000	0.000	0.000	80	526	7840	7360	0.019	Error	Error	3946	3894	0	0	3938	3422	0	0	0	0
1	19	16	""	"iYMR312W"	5900	16230	120	852	748	352	95	134	289	77	68	0	1547	1284	690	97	160	431	79	70	0	0	0	0	0	0	0	0	0	0	0	0	0	0	0	0	0	0	0	0.522	0.550	0.523	0.584	1.972	0.509	0.855	0.000	0.000	0.000	0.000	0.000	0.000	0.000	0.000	0.000	0.000	0.000	0.000	0.000	0.000	120	607	2207	1840	-0.938	Error	Error	757	1450	0	0	653	1187	0	0	0	0
1	20	16	""	"iYMR316C-A"	6090	16230	120	3569	3338	2121	97	116	130	90	86	0	2216	2155	1485	96	128	241	80	77	0	0	0	0	0	0	0	0	0	0	0	0	0	0	0	0	0	0	0	1.638	1.574	1.540	1.667	1.967	1.549	0.833	0.000	0.000	0.000	0.000	0.000	0.000	0.000	0.000	0.000	0.000	0.000	0.000	0.000	0.000	120	551	5592	5300	0.712	Error	Error	3472	2120	0	0	3241	2059	0	0	0	0
1	21	16	""	"iYMR319C-1"	6260	16240	110	1544	1681	1400	98	151	279	68	65	0	4632	4390	3966	99	265	869	65	63	0	0	0	0	0	0	0	0	0	0	0	0	0	0	0	0	0	0	0	0.319	0.369	0.369	0.491	2.928	0.335	0.865	0.000	0.000	0.000	0.000	0.000	0.000	0.000	0.000	0.000	0.000	0.000	0.000	0.000	0.000	80	476	5979	5874	-1.648	Error	Error	1446	4533	0	0	1583	4291	0	0	0	0
1	22	16	""	"iYNL331C"	6460	16230	120	2380	2104	1477	99	146	259	78	72	0	3140	2732	2134	104	232	736	68	62	0	0	0	0	0	0	0	0	0	0	0	0	0	0	0	0	0	0	0	0.751	0.763	0.741	0.900	2.223	0.688	0.829	0.000	0.000	0.000	0.000	0.000	0.000	0.000	0.000	0.000	0.000	0.000	0.000	0.000	0.000	120	693	5317	4633	-0.413	Error	Error	2281	3036	0	0	2005	2628	0	0	0	0
1	1	17	""	"iYNL327W"	2480	16430	110	1017	884	522	75	97	182	76	72	0	398	405	302	84	106	204	66	36	0	0	0	0	0	0	0	0	0	0	0	0	0	0	0	0	0	0	0	3.000	2.520	2.454	2.443	2.058	2.526	0.683	0.000	0.000	0.000	0.000	0.000	0.000	0.000	0.000	0.000	0.000	0.000	0.000	0.000	0.000	80	586	1256	1130	1.585	Error	Error	942	314	0	0	809	321	0	0	0	0
1	2	17	""	"iYNL322C"	2670	16430	110	782	687	484	80	92	102	73	67	0	2154	1785	1429	88	141	888	57	52	0	0	0	0	0	0	0	0	0	0	0	0	0	0	0	0	0	0	0	0.340	0.358	0.366	0.427	2.444	0.171	0.436	0.000	0.000	0.000	0.000	0.000	0.000	0.000	0.000	0.000	0.000	0.000	0.000	0.000	0.000	80	534	2768	2304	-1.557	Error	Error	702	2066	0	0	607	1697	0	0	0	0
1	3	17	""	"iYNL302C"	2860	16430	110	761	711	484	86	95	93	73	67	0	2268	2041	1584	92	105	108	72	68	0	0	0	0	0	0	0	0	0	0	0	0	0	0	0	0	0	0	0	0.310	0.321	0.303	0.334	2.325	0.278	0.788	0.000	0.000	0.000	0.000	0.000	0.000	0.000	0.000	0.000	0.000	0.000	0.000	0.000	0.000	80	502	2851	2574	-1.689	Error	Error	675	2176	0	0	625	1949	0	0	0	0
1	4	17	""	"iYNL298W"	3050	16420	120	5049	4235	3028	93	114	137	87	82	0	1276	1082	810	93	118	175	70	65	0	0	0	0	0	0	0	0	0	0	0	0	0	0	0	0	0	0	0	4.189	4.188	4.119	4.237	2.131	4.273	0.865	0.000	0.000	0.000	0.000	0.000	0.000	0.000	0.000	0.000	0.000	0.000	0.000	0.000	0.000	120	566	6139	5131	2.067	Error	Error	4956	1183	0	0	4142	989	0	0	0	0
1	5	17	""	"iYNL293W"	3240	16430	110	1164	1068	791	90	142	300	65	60	0	1638	1536	1251	93	135	301	63	60	0	0	0	0	0	0	0	0	0	0	0	0	0	0	0	0	0	0	0	0.695	0.678	0.694	0.705	3.369	0.626	0.863	0.000	0.000	0.000	0.000	0.000	0.000	0.000	0.000	0.000	0.000	0.000	0.000	0.000	0.000	80	533	2619	2421	-0.525	Error	Error	1074	1545	0	0	978	1443	0	0	0	0
1	6	17	""	"iYNL284C"	3440	16430	110	2313	2052	1343	93	125	263	76	73	0	3253	2708	2008	92	122	315	72	70	0	0	0	0	0	0	0	0	0	0	0	0	0	0	0	0	0	0	0	0.702	0.749	0.740	0.917	2.326	0.705	0.883	0.000	0.000	0.000	0.000	0.000	0.000	0.000	0.000	0.000	0.000	0.000	0.000	0.000	0.000	80	501	5381	4575	-0.510	Error	Error	2220	3161	0	0	1959	2616	0	0	0	0
1	7	17	""	"iYNL281W"	3610	16430	110	2109	1705	1148	97	139	257	75	70	0	1377	1088	790	95	143	242	70	65	0	0	0	0	0	0	0	0	0	0	0	0	0	0	0	0	0	0	0	1.569	1.619	1.561	1.502	2.343	1.578	0.858	0.000	0.000	0.000	0.000	0.000	0.000	0.000	0.000	0.000	0.000	0.000	0.000	0.000	0.000	80	505	3294	2601	0.650	Error	Error	2012	1282	0	0	1608	993	0	0	0	0
1	8	17	""	"iYNL276C"	3810	16430	120	1133	1104	878	92	138	250	69	64	0	1366	1377	1229	97	149	273	65	56	0	0	0	0	0	0	0	0	0	0	0	0	0	0	0	0	0	0	0	0.820	0.791	0.758	0.930	3.369	0.732	0.831	0.000	0.000	0.000	0.000	0.000	0.000	0.000	0.000	0.000	0.000	0.000	0.000	0.000	0.000	120	644	2310	2292	-0.286	Error	Error	1041	1269	0	0	1012	1280	0	0	0	0
1	9	17	""	"iYNR042W"	4030	16430	110	1324	1076	582	88	109	135	86	78	0	3209	2515	1561	101	126	211	76	75	0	0	0	0	0	0	0	0	0	0	0	0	0	0	0	0	0	0	0	0.398	0.409	0.416	0.555	2.608	0.379	0.877	0.000	0.000	0.000	0.000	0.000	0.000	0.000	0.000	0.000	0.000	0.000	0.000	0.000	0.000	80	498	4344	3402	-1.330	Error	Error	1236	3108	0	0	988	2414	0	0	0	0
1	10	17	""	"iYNR046W"	4190	16430	100	1029	944	718	94	167	320	68	61	0	2323	2191	1849	107	243	595	67	61	0	0	0	0	0	0	0	0	0	0	0	0	0	0	0	0	0	0	0	0.422	0.408	0.408	0.449	2.438	0.360	0.857	0.000	0.000	0.000	0.000	0.000	0.000	0.000	0.000	0.000	0.000	0.000	0.000	0.000	0.000	80	462	3151	2934	-1.245	Error	Error	935	2216	0	0	850	2084	0	0	0	0
1	11	17	""	"iYNR050C"	4400	16430	110	2178	2106	1707	94	260	751	68	58	0	2264	2135	1839	105	246	620	63	60	0	0	0	0	0	0	0	0	0	0	0	0	0	0	0	0	0	0	0	0.965	0.991	0.966	1.069	2.295	0.937	0.871	0.000	0.000	0.000	0.000	0.000	0.000	0.000	0.000	0.000	0.000	0.000	0.000	0.000	0.000	80	544	4243	4042	-0.051	Error	Error	2084	2159	0	0	2012	2030	0	0	0	0
1	12	17	""	"iYNR063W"	4600	16430	110	3934	3580	2734	94	235	754	71	67	0	2667	2136	1735	105	176	439	66	62	0	0	0	0	0	0	0	0	0	0	0	0	0	0	0	0	0	0	0	1.499	1.716	1.646	1.711	2.209	1.699	0.870	0.000	0.000	0.000	0.000	0.000	0.000	0.000	0.000	0.000	0.000	0.000	0.000	0.000	0.000	80	501	6402	5517	0.584	Error	Error	3840	2562	0	0	3486	2031	0	0	0	0
1	13	17	""	"iYNR068C"	4770	16430	110	1220	1129	789	96	113	119	77	73	0	1742	1538	1127	102	132	323	70	66	0	0	0	0	0	0	0	0	0	0	0	0	0	0	0	0	0	0	0	0.685	0.719	0.691	0.786	2.837	0.670	0.863	0.000	0.000	0.000	0.000	0.000	0.000	0.000	0.000	0.000	0.000	0.000	0.000	0.000	0.000	80	447	2764	2469	-0.545	Error	Error	1124	1640	0	0	1033	1436	0	0	0	0
1	14	17	""	"iYNR071C"	4930	16430	110	2389	2306	1687	102	179	407	76	71	0	1992	1913	1512	103	206	648	66	65	0	0	0	0	0	0	0	0	0	0	0	0	0	0	0	0	0	0	0	1.211	1.218	1.159	1.297	2.348	1.039	0.664	0.000	0.000	0.000	0.000	0.000	0.000	0.000	0.000	0.000	0.000	0.000	0.000	0.000	0.000	80	491	4176	4014	0.276	Error	Error	2287	1889	0	0	2204	1810	0	0	0	0
1	15	17	""	"iYOL160W-1"	5140	16430	110	3114	2804	2239	97	283	1256	63	53	0	3193	3376	2903	101	315	1103	63	57	0	0	0	0	0	0	0	0	0	0	0	0	0	0	0	0	0	0	0	0.976	0.827	0.801	0.955	2.587	0.789	0.864	0.000	0.000	0.000	0.000	0.000	0.000	0.000	0.000	0.000	0.000	0.000	0.000	0.000	0.000	80	530	6109	5982	-0.035	Error	Error	3017	3092	0	0	2707	3275	0	0	0	0
1	16	17	""	"iYOL157C"	5330	16430	120	5216	4324	3441	88	211	1219	68	62	0	5603	4615	4111	95	227	938	65	59	0	0	0	0	0	0	0	0	0	0	0	0	0	0	0	0	0	0	0	0.931	0.937	0.942	1.368	3.032	0.859	0.831	0.000	0.000	0.000	0.000	0.000	0.000	0.000	0.000	0.000	0.000	0.000	0.000	0.000	0.000	120	518	10636	8756	-0.103	Error	Error	5128	5508	0	0	4236	4520	0	0	0	0
1	17	17	""	"iYOL155C-1"	5500	16430	110	784	897	820	89	134	199	72	63	0	883	1080	1149	97	159	279	65	60	0	0	0	0	0	0	0	0	0	0	0	0	0	0	0	0	0	0	0	0.884	0.822	0.777	1.066	3.290	0.713	0.810	0.000	0.000	0.000	0.000	0.000	0.000	0.000	0.000	0.000	0.000	0.000	0.000	0.000	0.000	80	477	1481	1791	-0.178	Error	Error	695	786	0	0	808	983	0	0	0	0
1	18	17	""	"iYOL138C"	5700	16420	110	559	523	404	93	154	267	56	42	0	1665	1379	1189	99	225	462	57	55	0	0	0	0	0	0	0	0	0	0	0	0	0	0	0	0	0	0	0	0.298	0.336	0.372	0.453	2.399	0.302	0.822	0.000	0.000	0.000	0.000	0.000	0.000	0.000	0.000	0.000	0.000	0.000	0.000	0.000	0.000	80	521	2032	1710	-1.749	Error	Error	466	1566	0	0	430	1280	0	0	0	0
1	19	17	""	"iYOL133W"	5890	16420	110	602	693	635	92	124	140	68	65	0	1830	1821	1743	100	229	518	70	60	0	0	0	0	0	0	0	0	0	0	0	0	0	0	0	0	0	0	0	0.295	0.349	0.349	0.344	2.121	0.323	0.854	0.000	0.000	0.000	0.000	0.000	0.000	0.000	0.000	0.000	0.000	0.000	0.000	0.000	0.000	80	518	2240	2322	-1.762	Error	Error	510	1730	0	0	601	1721	0	0	0	0
1	20	17	""	"iYOL129W"	6090	16420	110	1219	1173	1073	98	158	267	56	52	0	1195	1033	919	97	201	414	56	55	0	0	0	0	0	0	0	0	0	0	0	0	0	0	0	0	0	0	0	1.021	1.149	1.056	0.847	2.329	1.141	0.871	0.000	0.000	0.000	0.000	0.000	0.000	0.000	0.000	0.000	0.000	0.000	0.000	0.000	0.000	80	530	2219	2011	0.030	Error	Error	1121	1098	0	0	1075	936	0	0	0	0
1	21	17	""	"iYOR161C"	6290	16430	110	5427	4882	3670	110	210	427	82	72	0	3350	2878	2368	102	203	435	67	63	0	0	0	0	0	0	0	0	0	0	0	0	0	0	0	0	0	0	0	1.637	1.719	1.729	2.137	2.463	1.656	0.875	0.000	0.000	0.000	0.000	0.000	0.000	0.000	0.000	0.000	0.000	0.000	0.000	0.000	0.000	80	538	8565	7548	0.711	Error	Error	5317	3248	0	0	4772	2776	0	0	0	0
1	22	17	""	"iYOR165W"	6490	16430	110	1242	1168	783	103	166	358	72	62	0	1070	845	634	102	158	361	61	56	0	0	0	0	0	0	0	0	0	0	0	0	0	0	0	0	0	0	0	1.177	1.433	1.341	1.360	2.565	1.306	0.856	0.000	0.000	0.000	0.000	0.000	0.000	0.000	0.000	0.000	0.000	0.000	0.000	0.000	0.000	80	539	2107	1808	0.235	Error	Error	1139	968	0	0	1065	743	0	0	0	0
1	1	18	""	"iYOR172W"	2500	16620	110	3446	2651	1894	76	118	295	77	72	0	4328	3487	2658	86	124	467	68	66	0	0	0	0	0	0	0	0	0	0	0	0	0	0	0	0	0	0	0	0.794	0.757	0.758	0.848	2.510	0.689	0.883	0.000	0.000	0.000	0.000	0.000	0.000	0.000	0.000	0.000	0.000	0.000	0.000	0.000	0.000	80	530	7612	5976	-0.332	Error	Error	3370	4242	0	0	2575	3401	0	0	0	0
1	2	18	""	"iYOR183W"	2680	16610	110	425	381	238	87	108	184	57	46	0	1042	897	681	98	112	105	68	67	0	0	0	0	0	0	0	0	0	0	0	0	0	0	0	0	0	0	0	0.358	0.368	0.374	0.366	2.172	0.404	0.573	0.000	0.000	0.000	0.000	0.000	0.000	0.000	0.000	0.000	0.000	0.000	0.000	0.000	0.000	80	500	1282	1093	-1.482	Error	Error	338	944	0	0	294	799	0	0	0	0
1	3	18	""	"iYOR187W"	2870	16610	110	918	805	495	96	119	121	78	73	0	3109	2370	1549	101	142	281	75	71	0	0	0	0	0	0	0	0	0	0	0	0	0	0	0	0	0	0	0	0.273	0.312	0.326	0.347	2.060	0.304	0.852	0.000	0.000	0.000	0.000	0.000	0.000	0.000	0.000	0.000	0.000	0.000	0.000	0.000	0.000	80	498	3830	2978	-1.872	Error	Error	822	3008	0	0	709	2269	0	0	0	0
1	4	18	""	"iYOR191W"	3050	16610	110	10937	10740	8398	101	324	1464	73	73	0	4813	4227	3407	97	240	758	68	67	0	0	0	0	0	0	0	0	0	0	0	0	0	0	0	0	0	0	0	2.298	2.576	2.604	2.894	2.148	2.634	0.885	0.000	0.000	0.000	0.000	0.000	0.000	0.000	0.000	0.000	0.000	0.000	0.000	0.000	0.000	80	495	15552	14769	1.200	Error	Error	10836	4716	0	0	10639	4130	0	0	0	0
1	5	18	""	"iYOR208W"	3230	16610	110	3876	3279	2320	103	491	1695	63	57	0	1215	975	744	96	267	761	57	23	0	0	0	0	0	0	0	0	0	0	0	0	0	0	0	0	0	0	0	3.372	3.613	3.350	2.674	3.180	2.957	0.819	0.000	0.000	0.000	0.000	0.000	0.000	0.000	0.000	0.000	0.000	0.000	0.000	0.000	0.000	80	501	4892	4055	1.754	Error	Error	3773	1119	0	0	3176	879	0	0	0	0
1	6	18	""	"iYOR212W"	3420	16610	110	3245	2946	2124	99	372	1041	68	63	0	2388	1927	1509	99	246	532	65	60	0	0	0	0	0	0	0	0	0	0	0	0	0	0	0	0	0	0	0	1.374	1.557	1.551	1.659	2.333	1.520	0.867	0.000	0.000	0.000	0.000	0.000	0.000	0.000	0.000	0.000	0.000	0.000	0.000	0.000	0.000	80	525	5435	4675	0.459	Error	Error	3146	2289	0	0	2847	1828	0	0	0	0
1	7	18	""	"iYOR216C"	3620	16610	110	791	715	466	93	192	534	60	16	0	1704	1512	1139	98	214	473	67	61	0	0	0	0	0	0	0	0	0	0	0	0	0	0	0	0	0	0	0	0.435	0.440	0.446	0.553	2.634	0.393	0.809	0.000	0.000	0.000	0.000	0.000	0.000	0.000	0.000	0.000	0.000	0.000	0.000	0.000	0.000	80	536	2304	2036	-1.202	Error	Error	698	1606	0	0	622	1414	0	0	0	0
1	8	18	""	"iYOR234C"	3820	16610	100	771	712	528	87	108	104	71	68	0	1940	1537	1159	100	175	338	66	65	0	0	0	0	0	0	0	0	0	0	0	0	0	0	0	0	0	0	0	0.372	0.435	0.433	0.499	2.249	0.413	0.868	0.000	0.000	0.000	0.000	0.000	0.000	0.000	0.000	0.000	0.000	0.000	0.000	0.000	0.000	80	451	2524	2062	-1.428	Error	Error	684	1840	0	0	625	1437	0	0	0	0
1	9	18	""	"iYOR238W"	4010	16610	110	1234	1033	577	92	167	286	80	70	0	3726	2867	1750	105	254	573	75	72	0	0	0	0	0	0	0	0	0	0	0	0	0	0	0	0	0	0	0	0.315	0.341	0.345	0.393	2.276	0.317	0.877	0.000	0.000	0.000	0.000	0.000	0.000	0.000	0.000	0.000	0.000	0.000	0.000	0.000	0.000	80	553	4763	3703	-1.665	Error	Error	1142	3621	0	0	941	2762	0	0	0	0
1	10	18	""	"iYOR243C"	4230	16610	100	1053	982	669	96	186	319	67	60	0	1602	1333	971	103	243	525	65	60	0	0	0	0	0	0	0	0	0	0	0	0	0	0	0	0	0	0	0	0.638	0.720	0.693	0.721	2.269	0.702	0.837	0.000	0.000	0.000	0.000	0.000	0.000	0.000	0.000	0.000	0.000	0.000	0.000	0.000	0.000	80	464	2456	2116	-0.647	Error	Error	957	1499	0	0	886	1230	0	0	0	0
1	11	18	""	"iYPL131W"	4400	16610	110	966	1017	743	91	96	49	82	80	0	1854	1553	1215	101	108	46	73	70	0	0	0	0	0	0	0	0	0	0	0	0	0	0	0	0	0	0	0	0.499	0.638	0.644	0.720	2.402	0.574	0.811	0.000	0.000	0.000	0.000	0.000	0.000	0.000	0.000	0.000	0.000	0.000	0.000	0.000	0.000	80	478	2628	2378	-1.002	Error	Error	875	1753	0	0	926	1452	0	0	0	0
1	12	18	""	"iYPL127C"	4580	16610	110	1020	990	670	87	142	385	68	60	0	3633	3416	2599	100	254	900	68	63	0	0	0	0	0	0	0	0	0	0	0	0	0	0	0	0	0	0	0	0.264	0.272	0.280	0.369	3.468	0.242	0.853	0.000	0.000	0.000	0.000	0.000	0.000	0.000	0.000	0.000	0.000	0.000	0.000	0.000	0.000	80	490	4466	4219	-1.921	Error	Error	933	3533	0	0	903	3316	0	0	0	0
1	13	18	""	"iYPL123C"	4760	16610	110	1656	1551	1119	94	152	264	75	66	0	1484	1346	1008	104	274	889	60	40	0	0	0	0	0	0	0	0	0	0	0	0	0	0	0	0	0	0	0	1.132	1.173	1.225	1.183	2.382	0.824	0.555	0.000	0.000	0.000	0.000	0.000	0.000	0.000	0.000	0.000	0.000	0.000	0.000	0.000	0.000	80	501	2942	2699	0.179	Error	Error	1562	1380	0	0	1457	1242	0	0	0	0
1	14	18	""	"iYPL106C"	4950	16610	110	1772	1446	985	108	183	298	73	63	0	3581	3069	2381	110	260	668	68	66	0	0	0	0	0	0	0	0	0	0	0	0	0	0	0	0	0	0	0	0.479	0.452	0.424	0.563	2.749	0.409	0.845	0.000	0.000	0.000	0.000	0.000	0.000	0.000	0.000	0.000	0.000	0.000	0.000	0.000	0.000	80	546	5135	4297	-1.061	Error	Error	1664	3471	0	0	1338	2959	0	0	0	0
1	15	18	""	"iYPL101W"	5180	16610	110	522	550	386	101	149	202	63	50	0	1219	1178	904	104	212	562	60	50	0	0	0	0	0	0	0	0	0	0	0	0	0	0	0	0	0	0	0	0.378	0.418	0.419	0.463	2.425	0.399	0.820	0.000	0.000	0.000	0.000	0.000	0.000	0.000	0.000	0.000	0.000	0.000	0.000	0.000	0.000	80	484	1536	1523	-1.405	Error	Error	421	1115	0	0	449	1074	0	0	0	0
1	16	18	""	"iYPL095C"	5340	16620	120	2800	2478	1611	95	104	67	87	83	0	2691	2333	1685	100	112	69	79	77	0	0	0	0	0	0	0	0	0	0	0	0	0	0	0	0	0	0	0	1.044	1.067	1.056	1.209	2.587	0.996	0.866	0.000	0.000	0.000	0.000	0.000	0.000	0.000	0.000	0.000	0.000	0.000	0.000	0.000	0.000	120	486	5296	4616	0.062	Error	Error	2705	2591	0	0	2383	2233	0	0	0	0
1	17	18	""	"iYPL079W"	5530	16620	120	4851	4256	2668	91	106	106	91	89	0	2211	1918	1289	98	117	157	79	76	0	0	0	0	0	0	0	0	0	0	0	0	0	0	0	0	0	0	0	2.253	2.288	2.197	2.349	2.054	2.326	0.865	0.000	0.000	0.000	0.000	0.000	0.000	0.000	0.000	0.000	0.000	0.000	0.000	0.000	0.000	120	508	6873	5985	1.172	Error	Error	4760	2113	0	0	4165	1820	0	0	0	0
1	18	18	""	"iYPL076W-1"	5710	16610	120	1029	1021	812	94	106	68	79	71	0	3296	3060	2745	100	129	193	70	68	0	0	0	0	0	0	0	0	0	0	0	0	0	0	0	0	0	0	0	0.293	0.313	0.318	0.377	2.584	0.278	0.883	0.000	0.000	0.000	0.000	0.000	0.000	0.000	0.000	0.000	0.000	0.000	0.000	0.000	0.000	120	540	4131	3887	-1.773	Error	Error	935	3196	0	0	927	2960	0	0	0	0
1	19	18	""	"iYPL070W"	5910	16620	120	4912	4148	3173	103	116	76	89	84	0	1100	1041	852	101	130	239	61	58	0	0	0	0	0	0	0	0	0	0	0	0	0	0	0	0	0	0	0	4.814	4.303	4.001	3.976	2.940	4.232	0.873	0.000	0.000	0.000	0.000	0.000	0.000	0.000	0.000	0.000	0.000	0.000	0.000	0.000	0.000	120	543	5808	4985	2.267	Error	Error	4809	999	0	0	4045	940	0	0	0	0
1	20	18	""	"iYPL057C"	6080	16610	110	810	785	530	109	135	137	73	70	0	2331	2348	1797	106	184	473	70	66	0	0	0	0	0	0	0	0	0	0	0	0	0	0	0	0	0	0	0	0.315	0.302	0.314	0.335	2.155	0.281	0.826	0.000	0.000	0.000	0.000	0.000	0.000	0.000	0.000	0.000	0.000	0.000	0.000	0.000	0.000	80	490	2926	2918	-1.666	Error	Error	701	2225	0	0	676	2242	0	0	0	0
1	21	18	""	"iYPL053C"	6280	16610	110	1003	902	629	112	154	178	71	68	0	2347	2124	1614	112	236	535	67	65	0	0	0	0	0	0	0	0	0	0	0	0	0	0	0	0	0	0	0	0.399	0.393	0.402	0.417	2.361	0.378	0.821	0.000	0.000	0.000	0.000	0.000	0.000	0.000	0.000	0.000	0.000	0.000	0.000	0.000	0.000	80	533	3126	2802	-1.327	Error	Error	891	2235	0	0	790	2012	0	0	0	0
1	22	18	""	"iYPL049C"	6480	16610	110	417	433	282	113	143	154	68	48	0	1277	1192	929	112	193	356	70	58	0	0	0	0	0	0	0	0	0	0	0	0	0	0	0	0	0	0	0	0.261	0.296	0.323	0.342	1.948	0.260	0.731	0.000	0.000	0.000	0.000	0.000	0.000	0.000	0.000	0.000	0.000	0.000	0.000	0.000	0.000	80	554	1469	1400	-1.938	Error	Error	304	1165	0	0	320	1080	0	0	0	0
1	1	19	""	"YORWdelta19"	2500	16810	120	1297	1098	702	80	99	169	81	76	0	668	548	357	84	109	404	61	14	0	0	0	0	0	0	0	0	0	0	0	0	0	0	0	0	0	0	0	2.084	2.194	2.094	2.167	2.441	2.289	0.779	0.000	0.000	0.000	0.000	0.000	0.000	0.000	0.000	0.000	0.000	0.000	0.000	0.000	0.000	120	600	1801	1482	1.059	Error	Error	1217	584	0	0	1018	464	0	0	0	0
1	2	19	""	"TEL15R-5"	2690	16810	120	28127	25671	18076	99	146	252	95	92	2	42687	34759	24890	103	134	138	97	90	5	0	0	0	0	0	0	0	0	0	0	0	0	0	0	0	0	0	0	0.658	0.738	0.756	1.026	3.142	0.723	0.877	0.000	0.000	0.000	0.000	0.000	0.000	0.000	0.000	0.000	0.000	0.000	0.000	0.000	0.000	120	525	70612	60228	-0.603	Error	Error	28028	42584	0	0	25572	34656	0	0	0	0
1	3	19	""	"YPLCtau1"	2880	16810	120	17860	16190	12420	103	150	221	94	88	0	7167	6531	5399	102	146	254	72	70	0	0	0	0	0	0	0	0	0	0	0	0	0	0	0	0	0	0	0	2.513	2.502	2.511	3.725	3.204	2.570	0.871	0.000	0.000	0.000	0.000	0.000	0.000	0.000	0.000	0.000	0.000	0.000	0.000	0.000	0.000	120	443	24822	22516	1.330	Error	Error	17757	7065	0	0	16087	6429	0	0	0	0
1	4	19	""	"Q0055"	2990	16800	100	237	545	1253	105	132	84	57	43	0	217	535	1334	100	127	78	65	40	0	0	0	0	0	0	0	0	0	0	0	0	0	0	0	0	0	0	0	1.128	1.011	1.253	1.071	2.496	1.182	0.556	0.000	0.000	0.000	0.000	0.000	0.000	0.000	0.000	0.000	0.000	0.000	0.000	0.000	0.000	80	377	249	875	0.174	Error	Error	132	117	0	0	440	435	0	0	0	0
1	5	19	""	"Q0075"	3250	16810	120	159	174	78	97	167	521	0	0	0	191	183	82	91	124	160	20	0	0	0	0	0	0	0	0	0	0	0	0	0	0	0	0	0	0	0	0	0.620	0.837	0.710	0.743	2.622	0.881	0.413	0.000	0.000	0.000	0.000	0.000	0.000	0.000	0.000	0.000	0.000	0.000	0.000	0.000	0.000	120	585	162	169	-0.690	Error	Error	62	100	0	0	77	92	0	0	0	0
1	6	19	""	"Q0095"	3450	16810	120	202	210	94	86	141	410	0	0	0	255	239	130	91	139	313	9	0	0	0	0	0	0	0	0	0	0	0	0	0	0	0	0	0	0	0	0	0.707	0.838	0.723	0.650	2.245	0.666	0.450	0.000	0.000	0.000	0.000	0.000	0.000	0.000	0.000	0.000	0.000	0.000	0.000	0.000	0.000	120	514	280	272	-0.500	Error	Error	116	164	0	0	124	148	0	0	0	0
1	7	19	""	"Q0180"	3630	16800	110	486	527	360	84	96	74	77	72	0	5978	5497	4411	96	258	911	72	70	0	0	0	0	0	0	0	0	0	0	0	0	0	0	0	0	0	0	0	0.068	0.082	0.084	0.103	2.842	0.073	0.811	0.000	0.000	0.000	0.000	0.000	0.000	0.000	0.000	0.000	0.000	0.000	0.000	0.000	0.000	80	461	6284	5844	-3.871	Error	Error	402	5882	0	0	443	5401	0	0	0	0
1	8	19	""	"IntQ0185A"	3830	16810	120	1022	967	620	87	99	85	85	80	0	12651	11211	8299	100	252	878	77	73	0	0	0	0	0	0	0	0	0	0	0	0	0	0	0	0	0	0	0	0.074	0.079	0.081	0.100	2.804	0.071	0.863	0.000	0.000	0.000	0.000	0.000	0.000	0.000	0.000	0.000	0.000	0.000	0.000	0.000	0.000	120	516	13486	11991	-3.747	Error	Error	935	12551	0	0	880	11111	0	0	0	0
1	9	19	""	"Q0195"	4000	16810	110	179	330	805	80	88	58	68	42	0	427	1009	3306	93	116	199	68	35	0	0	0	0	0	0	0	0	0	0	0	0	0	0	0	0	0	0	0	0.296	0.273	0.297	0.294	2.514	0.208	0.693	0.000	0.000	0.000	0.000	0.000	0.000	0.000	0.000	0.000	0.000	0.000	0.000	0.000	0.000	80	452	433	1166	-1.754	Error	Error	99	334	0	0	250	916	0	0	0	0
1	10	19	""	"Q0257"	4210	16810	120	153	152	63	80	101	145	11	0	0	378	343	161	88	112	183	74	18	0	0	0	0	0	0	0	0	0	0	0	0	0	0	0	0	0	0	0	0.252	0.282	0.303	0.314	2.524	0.283	0.524	0.000	0.000	0.000	0.000	0.000	0.000	0.000	0.000	0.000	0.000	0.000	0.000	0.000	0.000	120	530	363	327	-1.990	Error	Error	73	290	0	0	72	255	0	0	0	0
1	11	19	""	"IntQ0280A"	4380	16800	110	304	294	138	84	106	81	76	70	0	826	710	366	95	155	211	80	71	0	0	0	0	0	0	0	0	0	0	0	0	0	0	0	0	0	0	0	0.301	0.341	0.331	0.333	1.716	0.318	0.726	0.000	0.000	0.000	0.000	0.000	0.000	0.000	0.000	0.000	0.000	0.000	0.000	0.000	0.000	80	468	951	825	-1.732	Error	Error	220	731	0	0	210	615	0	0	0	0
1	12	19	""	"Q0295"	4600	16810	120	571	588	343	88	139	349	65	28	0	2135	2033	1344	99	218	617	79	71	0	0	0	0	0	0	0	0	0	0	0	0	0	0	0	0	0	0	0	0.237	0.259	0.245	0.263	2.416	0.297	0.506	0.000	0.000	0.000	0.000	0.000	0.000	0.000	0.000	0.000	0.000	0.000	0.000	0.000	0.000	120	526	2519	2434	-2.076	Error	Error	483	2036	0	0	500	1934	0	0	0	0
1	13	19	""	"iYHR216W"	4780	16810	120	14150	14120	10069	93	136	356	91	88	0	5658	5315	4191	98	128	283	80	74	0	0	0	0	0	0	0	0	0	0	0	0	0	0	0	0	0	0	0	2.528	2.689	2.628	3.191	2.570	2.637	0.885	0.000	0.000	0.000	0.000	0.000	0.000	0.000	0.000	0.000	0.000	0.000	0.000	0.000	0.000	120	475	19617	19244	1.338	Error	Error	14057	5560	0	0	14027	5217	0	0	0	0
1	14	19	""	"TEL9L"	4970	16810	120	34467	28339	15744	110	150	170	100	98	0	17708	14356	8834	106	163	391	90	87	0	0	0	0	0	0	0	0	0	0	0	0	0	0	0	0	0	0	0	1.952	1.981	1.953	2.497	2.427	1.942	0.912	0.000	0.000	0.000	0.000	0.000	0.000	0.000	0.000	0.000	0.000	0.000	0.000	0.000	0.000	120	491	51959	42479	0.965	Error	Error	34357	17602	0	0	28229	14250	0	0	0	0
1	15	19	""	"YILCdelta3"	5160	16810	120	7325	6412	5453	116	142	113	90	87	0	3125	3424	3210	107	140	157	71	66	0	0	0	0	0	0	0	0	0	0	0	0	0	0	0	0	0	0	0	2.389	1.898	1.746	2.333	2.752	1.843	0.839	0.000	0.000	0.000	0.000	0.000	0.000	0.000	0.000	0.000	0.000	0.000	0.000	0.000	0.000	120	484	10227	9613	1.256	Error	Error	7209	3018	0	0	6296	3317	0	0	0	0
1	16	19	""	"YJRWdelta14"	5330	16800	110	580	529	301	104	127	92	80	71	0	603	536	338	104	133	111	72	68	0	0	0	0	0	0	0	0	0	0	0	0	0	0	0	0	0	0	0	0.954	0.984	0.933	0.956	2.199	0.917	0.766	0.000	0.000	0.000	0.000	0.000	0.000	0.000	0.000	0.000	0.000	0.000	0.000	0.000	0.000	80	415	975	857	-0.068	Error	Error	476	499	0	0	425	432	0	0	0	0
1	17	19	""	"SNR64"	5530	16810	120	422	419	257	92	109	79	74	65	0	842	702	487	100	120	99	70	65	0	0	0	0	0	0	0	0	0	0	0	0	0	0	0	0	0	0	0	0.445	0.543	0.519	0.590	2.819	0.501	0.807	0.000	0.000	0.000	0.000	0.000	0.000	0.000	0.000	0.000	0.000	0.000	0.000	0.000	0.000	120	497	1072	929	-1.169	Error	Error	330	742	0	0	327	602	0	0	0	0
1	18	19	""	"YKL162C-A"	5710	16800	100	714	665	518	95	139	186	63	56	0	532	566	487	97	145	185	56	51	0	0	0	0	0	0	0	0	0	0	0	0	0	0	0	0	0	0	0	1.423	1.215	1.163	1.419	2.734	1.122	0.811	0.000	0.000	0.000	0.000	0.000	0.000	0.000	0.000	0.000	0.000	0.000	0.000	0.000	0.000	80	402	1054	1039	0.509	Error	Error	619	435	0	0	570	469	0	0	0	0
1	19	19	""	"itQ(UUG)L"	5910	16810	120	1007	942	559	108	147	170	80	74	0	854	716	449	97	138	167	75	67	0	0	0	0	0	0	0	0	0	0	0	0	0	0	0	0	0	0	0	1.188	1.347	1.286	1.323	2.496	1.298	0.838	0.000	0.000	0.000	0.000	0.000	0.000	0.000	0.000	0.000	0.000	0.000	0.000	0.000	0.000	120	504	1656	1453	0.248	Error	Error	899	757	0	0	834	619	0	0	0	0
1	20	19	""	"RDN25-1B"	6110	16810	120	30635	28432	18031	111	134	101	99	98	0	5606	4694	3141	102	130	252	83	80	0	0	0	0	0	0	0	0	0	0	0	0	0	0	0	0	0	0	0	5.546	6.167	6.007	6.382	1.844	6.265	0.891	0.000	0.000	0.000	0.000	0.000	0.000	0.000	0.000	0.000	0.000	0.000	0.000	0.000	0.000	120	507	36028	32913	2.471	Error	Error	30524	5504	0	0	28321	4592	0	0	0	0
1	21	19	""	"RDN37-1"	6300	16810	120	14457	12061	7124	121	150	110	98	95	0	6430	5614	3760	110	134	175	87	85	0	0	0	0	0	0	0	0	0	0	0	0	0	0	0	0	0	0	0	2.268	2.169	2.107	2.435	2.059	2.100	0.899	0.000	0.000	0.000	0.000	0.000	0.000	0.000	0.000	0.000	0.000	0.000	0.000	0.000	0.000	120	491	20656	17444	1.182	Error	Error	14336	6320	0	0	11940	5504	0	0	0	0
1	22	19	""	"iYLR162W-A"	6490	16810	120	18296	17051	10896	120	137	78	98	98	0	3798	3580	2499	105	123	98	86	83	0	0	0	0	0	0	0	0	0	0	0	0	0	0	0	0	0	0	0	4.922	4.872	4.633	5.344	2.005	4.872	0.890	0.000	0.000	0.000	0.000	0.000	0.000	0.000	0.000	0.000	0.000	0.000	0.000	0.000	0.000	120	571	21869	20406	2.299	Error	Error	18176	3693	0	0	16931	3475	0	0	0	0
1	1	20	""	"tI(UAU)L"	2490	17000	120	241	259	144	75	78	29	82	77	0	376	339	224	79	81	26	73	69	0	0	0	0	0	0	0	0	0	0	0	0	0	0	0	0	0	0	0	0.559	0.708	0.730	0.747	2.754	0.644	0.686	0.000	0.000	0.000	0.000	0.000	0.000	0.000	0.000	0.000	0.000	0.000	0.000	0.000	0.000	120	674	463	444	-0.839	Error	Error	166	297	0	0	184	260	0	0	0	0
1	2	20	""	"YLRWdelta17"	2690	17000	120	897	780	402	81	84	32	93	90	0	833	700	406	86	89	26	85	83	0	0	0	0	0	0	0	0	0	0	0	0	0	0	0	0	0	0	0	1.092	1.138	1.119	1.101	2.170	1.075	0.809	0.000	0.000	0.000	0.000	0.000	0.000	0.000	0.000	0.000	0.000	0.000	0.000	0.000	0.000	120	559	1563	1313	0.127	Error	Error	816	747	0	0	699	614	0	0	0	0
1	3	20	"EMPTY"	"EMPTY"	2870	16990	150	80	81	32	85	99	134	0	0	0	87	90	25	87	97	61	4	0	0	0	0	0	0	0	0	0	0	0	0	0	0	0	0	0	0	0	0	100000.000	-1.333	1.541	1.566	2.915	6.354	0.005	0.000	0.000	0.000	0.000	0.000	0.000	0.000	0.000	0.000	0.000	0.000	0.000	0.000	0.000	156	690	-5	-1	16.610	Error	Error	-5	0	0	0	-4	3	0	0	-75	0
1	4	20	"EMPTY"	"EMPTY"	3060	16990	150	89	92	35	88	102	63	8	0	0	90	98	38	88	103	60	7	1	0	0	0	0	0	0	0	0	0	0	0	0	0	0	0	0	0	0	0	0.500	0.400	1.136	1.131	3.870	0.940	0.177	0.000	0.000	0.000	0.000	0.000	0.000	0.000	0.000	0.000	0.000	0.000	0.000	0.000	0.000	156	764	3	14	-1.000	Error	Error	1	2	0	0	4	10	0	0	-75	0
1	5	20	"EMPTY"	"EMPTY"	3250	16990	150	80	85	35	85	93	46	8	1	0	84	89	27	85	93	41	9	0	0	0	0	0	0	0	0	0	0	0	0	0	0	0	0	0	0	0	0	5.000	0.000	1.150	1.217	4.059	4.391	0.007	0.000	0.000	0.000	0.000	0.000	0.000	0.000	0.000	0.000	0.000	0.000	0.000	0.000	0.000	156	740	-6	4	2.322	Error	Error	-5	-1	0	0	0	4	0	0	-75	0
1	6	20	"EMPTY"	"EMPTY"	3440	16990	150	81	86	36	83	88	45	11	1	0	84	88	24	84	88	50	4	0	0	0	0	0	0	0	0	0	0	0	0	0	0	0	0	0	0	0	0	100000.000	0.750	1.453	1.342	3.813	0.835	0.316	0.000	0.000	0.000	0.000	0.000	0.000	0.000	0.000	0.000	0.000	0.000	0.000	0.000	0.000	156	718	-2	7	16.610	Error	Error	-2	0	0	0	3	4	0	0	-75	0
1	7	20	"EMPTY"	"EMPTY"	3630	16990	150	79	87	38	83	91	62	6	0	0	84	87	26	85	173	717	0	0	0	0	0	0	0	0	0	0	0	0	0	0	0	0	0	0	0	0	0	4.000	2.000	1.805	1.815	3.514	0.111	0.238	0.000	0.000	0.000	0.000	0.000	0.000	0.000	0.000	0.000	0.000	0.000	0.000	0.000	0.000	156	742	-5	6	2.000	Error	Error	-4	-1	0	0	4	2	0	0	-75	0
1	8	20	"EMPTY"	"EMPTY"	3820	16990	150	71	77	29	81	87	50	4	0	0	84	89	28	83	159	635	0	0	0	0	0	0	0	0	0	0	0	0	0	0	0	0	0	0	0	0	0	-10.000	-0.667	1.555	1.641	3.372	13.877	0.001	0.000	0.000	0.000	0.000	0.000	0.000	0.000	0.000	0.000	0.000	0.000	0.000	0.000	0.000	156	724	-9	2	Error	Error	Error	-10	1	0	0	-4	6	0	0	-75	0
1	9	20	"EMPTY"	"EMPTY"	4010	16990	150	78	83	34	75	79	31	25	4	0	84	86	22	84	90	45	5	0	0	0	0	0	0	0	0	0	0	0	0	0	0	0	0	0	0	0	0	100000.000	4.000	1.280	1.218	3.319	34.956	0.000	0.000	0.000	0.000	0.000	0.000	0.000	0.000	0.000	0.000	0.000	0.000	0.000	0.000	0.000	156	728	3	10	16.610	Error	Error	3	0	0	0	8	2	0	0	-75	0
1	10	20	"EMPTY"	"EMPTY"	4200	16990	150	79	82	31	74	80	35	17	1	0	85	90	34	84	87	27	15	3	0	0	0	0	0	0	0	0	0	0	0	0	0	0	0	0	0	0	0	5.000	1.333	1.204	1.158	4.677	4.145	0.017	0.000	0.000	0.000	0.000	0.000	0.000	0.000	0.000	0.000	0.000	0.000	0.000	0.000	0.000	156	732	6	14	2.322	Error	Error	5	1	0	0	8	6	0	0	-75	0
1	11	20	"EMPTY"	"EMPTY"	4390	16990	150	78	80	30	80	93	63	3	0	0	85	89	25	86	120	162	0	0	0	0	0	0	0	0	0	0	0	0	0	0	0	0	0	0	0	0	0	2.000	0.000	1.115	0.994	4.068	0.440	0.410	0.000	0.000	0.000	0.000	0.000	0.000	0.000	0.000	0.000	0.000	0.000	0.000	0.000	0.000	156	750	-3	3	1.000	Error	Error	-2	-1	0	0	0	3	0	0	-75	0
1	12	20	"EMPTY"	"EMPTY"	4580	16990	150	84	114	164	81	92	59	10	5	0	94	259	1347	88	116	139	3	3	0	0	0	0	0	0	0	0	0	0	0	0	0	0	0	0	0	0	0	0.500	0.193	1.323	1.437	4.120	0.087	0.442	0.000	0.000	0.000	0.000	0.000	0.000	0.000	0.000	0.000	0.000	0.000	0.000	0.000	0.000	156	734	9	204	-1.000	Error	Error	3	6	0	0	33	171	0	0	-75	0
1	13	20	"EMPTY"	"EMPTY"	4770	16990	150	79	82	32	81	89	48	8	0	0	88	92	26	88	97	70	2	0	0	0	0	0	0	0	0	0	0	0	0	0	0	0	0	0	0	0	0	100000.000	0.250	1.333	1.288	3.432	2.812	0.021	0.000	0.000	0.000	0.000	0.000	0.000	0.000	0.000	0.000	0.000	0.000	0.000	0.000	0.000	156	687	-2	5	16.610	Error	Error	-2	0	0	0	1	4	0	0	-75	0
1	14	20	"EMPTY"	"EMPTY"	4960	16990	150	82	85	36	88	104	76	1	0	0	87	92	37	91	106	86	1	0	0	0	0	0	0	0	0	0	0	0	0	0	0	0	0	0	0	0	0	1.500	-3.000	1.600	1.387	2.984	0.204	0.070	0.000	0.000	0.000	0.000	0.000	0.000	0.000	0.000	0.000	0.000	0.000	0.000	0.000	0.000	156	697	-10	-2	0.585	Error	Error	-6	-4	0	0	-3	1	0	0	-75	0
1	15	20	"EMPTY"	"EMPTY"	5150	16990	150	89	93	43	90	106	75	4	0	0	93	100	47	92	106	64	5	2	0	0	0	0	0	0	0	0	0	0	0	0	0	0	0	0	0	0	0	-1.000	0.375	1.450	1.444	3.569	0.979	0.068	0.000	0.000	0.000	0.000	0.000	0.000	0.000	0.000	0.000	0.000	0.000	0.000	0.000	0.000	156	702	0	11	Error	Error	Error	-1	1	0	0	3	8	0	0	-75	0
1	16	20	"EMPTY"	"EMPTY"	5340	16990	150	77	82	35	85	101	72	3	0	0	90	95	30	92	108	83	1	0	0	0	0	0	0	0	0	0	0	0	0	0	0	0	0	0	0	0	0	4.000	-1.000	1.333	1.288	3.911	0.007	0.002	0.000	0.000	0.000	0.000	0.000	0.000	0.000	0.000	0.000	0.000	0.000	0.000	0.000	0.000	156	733	-10	0	2.000	Error	Error	-8	-2	0	0	-3	3	0	0	-75	0
1	17	20	"EMPTY"	"EMPTY"	5530	16990	150	88	94	41	84	94	56	9	3	0	95	99	33	90	102	68	3	0	0	0	0	0	0	0	0	0	0	0	0	0	0	0	0	0	0	0	0	0.800	1.111	1.071	1.110	4.061	1.524	0.044	0.000	0.000	0.000	0.000	0.000	0.000	0.000	0.000	0.000	0.000	0.000	0.000	0.000	0.000	156	737	9	19	-0.322	Error	Error	4	5	0	0	10	9	0	0	-75	0
1	18	20	"EMPTY"	"EMPTY"	5720	16990	150	86	89	37	84	108	138	0	0	0	88	247	1942	89	115	134	0	0	0	0	0	0	0	0	0	0	0	0	0	0	0	0	0	0	0	0	0	-2.000	0.032	1.762	1.602	3.131	0.006	0.007	0.000	0.000	0.000	0.000	0.000	0.000	0.000	0.000	0.000	0.000	0.000	0.000	0.000	0.000	156	742	1	163	Error	Error	Error	2	-1	0	0	5	158	0	0	-75	0
1	19	20	"EMPTY"	"EMPTY"	5910	16990	150	88	96	40	89	110	122	1	0	0	90	101	37	91	113	118	1	0	0	0	0	0	0	0	0	0	0	0	0	0	0	0	0	0	0	0	0	1.000	0.700	1.030	1.178	3.744	0.999	0.096	0.000	0.000	0.000	0.000	0.000	0.000	0.000	0.000	0.000	0.000	0.000	0.000	0.000	0.000	156	732	-2	17	0.000	Error	Error	-1	-1	0	0	7	10	0	0	-75	0
1	20	20	"EMPTY"	"EMPTY"	6100	16990	150	95	96	40	98	107	66	3	0	0	92	100	31	93	101	44	11	3	0	0	0	0	0	0	0	0	0	0	0	0	0	0	0	0	0	0	0	3.000	-0.286	1.962	1.713	4.323	2.230	0.024	0.000	0.000	0.000	0.000	0.000	0.000	0.000	0.000	0.000	0.000	0.000	0.000	0.000	0.000	156	706	-4	5	1.585	Error	Error	-3	-1	0	0	-2	7	0	0	-75	0
1	21	20	"EMPTY"	"EMPTY"	6290	16990	150	85	91	40	103	121	84	3	0	0	91	95	28	95	106	48	4	1	0	0	0	0	0	0	0	0	0	0	0	0	0	0	0	0	0	0	0	4.500	100000.000	1.643	1.580	3.899	1.750	0.035	0.000	0.000	0.000	0.000	0.000	0.000	0.000	0.000	0.000	0.000	0.000	0.000	0.000	0.000	156	697	-22	-12	2.170	Error	Error	-18	-4	0	0	-12	0	0	0	-75	0
1	22	20	"EMPTY"	"EMPTY"	6480	16990	150	90	94	39	100	114	68	5	0	0	89	96	36	97	108	48	7	1	0	0	0	0	0	0	0	0	0	0	0	0	0	0	0	0	0	0	0	1.250	6.000	1.833	1.570	4.946	2.444	0.035	0.000	0.000	0.000	0.000	0.000	0.000	0.000	0.000	0.000	0.000	0.000	0.000	0.000	0.000	156	895	-18	-7	0.322	Error	Error	-10	-8	0	0	-6	-1	0	0	-75	0
2	1	1	"VPS8"	"YAL002W"	6990	13310	150	5325	5823	4396	109	132	123	98	98	0	997	1046	627	101	114	69	92	90	0	0	0	0	0	0	0	0	0	0	0	0	0	0	0	0	0	0	0	5.821	6.047	5.499	5.755	1.567	6.713	0.879	0.000	0.000	0.000	0.000	0.000	0.000	0.000	0.000	0.000	0.000	0.000	0.000	0.000	0.000	156	902	6112	6659	2.541	Error	Error	5216	896	0	0	5714	945	0	0	0	0
2	2	1	"MTW1"	"YAL034W-A"	7120	13330	110	19847	17601	7374	115	155	172	100	100	0	2697	2395	1104	103	122	89	96	96	0	0	0	0	0	0	0	0	0	0	0	0	0	0	0	0	0	0	0	7.607	7.629	7.448	8.162	1.639	7.466	0.931	0.000	0.000	0.000	0.000	0.000	0.000	0.000	0.000	0.000	0.000	0.000	0.000	0.000	0.000	80	405	22326	19778	2.927	Error	Error	19732	2594	0	0	17486	2292	0	0	0	0
2	3	1	""	"YAL064W-B"	7330	13320	140	13411	12359	6433	107	129	125	100	100	0	4813	4485	2651	100	110	60	96	96	0	0	0	0	0	0	0	0	0	0	0	0	0	0	0	0	0	0	0	2.823	2.794	2.676	3.111	1.886	2.775	0.859	0.000	0.000	0.000	0.000	0.000	0.000	0.000	0.000	0.000	0.000	0.000	0.000	0.000	0.000	156	692	18017	16637	1.497	Error	Error	13304	4713	0	0	12252	4385	0	0	0	0
2	4	1	""	"YAL004W"	7510	13320	140	4079	4017	1289	97	108	59	100	99	0	6351	5964	2169	100	107	45	98	98	0	0	0	0	0	0	0	0	0	0	0	0	0	0	0	0	0	0	0	0.637	0.668	0.683	0.688	1.556	0.642	0.911	0.000	0.000	0.000	0.000	0.000	0.000	0.000	0.000	0.000	0.000	0.000	0.000	0.000	0.000	156	610	10233	9784	-0.651	Error	Error	3982	6251	0	0	3920	5864	0	0	0	0
2	5	1	"FUN12"	"YAL035W"	7700	13340	150	87	97	39	93	102	54	10	1	0	98	108	37	98	106	46	13	2	0	0	0	0	0	0	0	0	0	0	0	0	0	0	0	0	0	0	0	100000.000	0.400	0.969	1.135	2.930	1.545	0.114	0.000	0.000	0.000	0.000	0.000	0.000	0.000	0.000	0.000	0.000	0.000	0.000	0.000	0.000	156	762	-6	14	16.610	Error	Error	-6	0	0	0	4	10	0	0	-50	0
2	6	1	""	"YAL066W"	7900	13300	100	153	161	62	93	98	40	62	35	0	160	162	50	96	102	36	68	38	0	0	0	0	0	0	0	0	0	0	0	0	0	0	0	0	0	0	0	0.938	1.030	1.264	1.052	3.189	1.328	0.204	0.000	0.000	0.000	0.000	0.000	0.000	0.000	0.000	0.000	0.000	0.000	0.000	0.000	0.000	80	413	124	134	-0.093	Error	Error	60	64	0	0	68	66	0	0	0	0
2	7	1	"ERP2"	"YAL007C"	8090	13310	120	205	224	81	89	97	48	89	65	0	176	190	56	91	99	42	88	50	0	0	0	0	0	0	0	0	0	0	0	0	0	0	0	0	0	0	0	1.365	1.364	1.447	1.296	2.560	1.622	0.360	0.000	0.000	0.000	0.000	0.000	0.000	0.000	0.000	0.000	0.000	0.000	0.000	0.000	0.000	120	552	201	234	0.449	Error	Error	116	85	0	0	135	99	0	0	0	0
2	8	1	""	"YAL037W"	8270	13340	150	94	95	35	91	104	111	0	0	0	92	97	31	92	101	49	7	2	0	0	0	0	0	0	0	0	0	0	0	0	0	0	0	0	0	0	0	100000.000	0.800	1.333	1.230	5.437	3.490	0.006	0.000	0.000	0.000	0.000	0.000	0.000	0.000	0.000	0.000	0.000	0.000	0.000	0.000	0.000	156	765	3	9	16.610	Error	Error	3	0	0	0	4	5	0	0	-50	0
2	9	1	""	"YAL068C"	8450	13320	110	15012	16410	4814	99	111	137	100	100	0	7217	7728	2198	97	104	46	100	100	0	0	0	0	0	0	0	0	0	0	0	0	0	0	0	0	0	0	0	2.095	2.137	2.128	2.128	1.177	2.153	0.927	0.000	0.000	0.000	0.000	0.000	0.000	0.000	0.000	0.000	0.000	0.000	0.000	0.000	0.000	80	451	22033	23942	1.067	Error	Error	14913	7120	0	0	16311	7631	0	0	0	0
2	10	1	"spo7"	"YAL009W"	8630	13310	120	8410	8351	1803	94	98	39	100	100	0	4881	4965	1082	96	101	32	100	100	0	0	0	0	0	0	0	0	0	0	0	0	0	0	0	0	0	0	0	1.738	1.696	1.726	1.690	1.282	1.761	0.899	0.000	0.000	0.000	0.000	0.000	0.000	0.000	0.000	0.000	0.000	0.000	0.000	0.000	0.000	120	536	13101	13126	0.797	Error	Error	8316	4785	0	0	8257	4869	0	0	0	0
2	11	1	"cyc3"	"YAL039C"	8800	13310	120	798	808	250	90	94	35	100	100	0	2330	2363	771	94	98	28	98	98	0	0	0	0	0	0	0	0	0	0	0	0	0	0	0	0	0	0	0	0.317	0.316	0.324	0.331	1.766	0.296	0.866	0.000	0.000	0.000	0.000	0.000	0.000	0.000	0.000	0.000	0.000	0.000	0.000	0.000	0.000	120	571	2944	2987	-1.659	Error	Error	708	2236	0	0	718	2269	0	0	0	0
2	12	1	"ERP1"	"YAR002C-A"	9030	13340	140	185	199	81	87	93	39	83	61	0	183	190	82	91	96	44	71	52	0	0	0	0	0	0	0	0	0	0	0	0	0	0	0	0	0	0	0	1.065	1.131	1.165	1.215	2.530	1.154	0.415	0.000	0.000	0.000	0.000	0.000	0.000	0.000	0.000	0.000	0.000	0.000	0.000	0.000	0.000	156	832	190	211	0.091	Error	Error	98	92	0	0	112	99	0	0	0	0
2	13	1	"SLI15"	"YBR156C"	9250	13330	140	3173	3360	1968	87	95	41	100	100	0	3195	3358	1919	92	99	47	96	94	0	0	0	0	0	0	0	0	0	0	0	0	0	0	0	0	0	0	0	0.995	1.002	0.979	1.069	2.163	1.040	0.838	0.000	0.000	0.000	0.000	0.000	0.000	0.000	0.000	0.000	0.000	0.000	0.000	0.000	0.000	156	677	6189	6539	-0.008	Error	Error	3086	3103	0	0	3273	3266	0	0	0	0
2	14	1	""	"YBR187W"	9390	13340	120	1505	1469	940	87	95	41	95	91	0	3672	3386	2332	94	102	35	95	95	0	0	0	0	0	0	0	0	0	0	0	0	0	0	0	0	0	0	0	0.396	0.420	0.446	0.484	2.176	0.392	0.897	0.000	0.000	0.000	0.000	0.000	0.000	0.000	0.000	0.000	0.000	0.000	0.000	0.000	0.000	120	483	4996	4674	-1.335	Error	Error	1418	3578	0	0	1382	3292	0	0	0	0
2	15	1	""	"YBR219C"	9600	13340	150	931	965	528	88	94	52	95	94	0	1836	1963	1218	94	101	35	93	93	0	0	0	0	0	0	0	0	0	0	0	0	0	0	0	0	0	0	0	0.484	0.469	0.462	0.509	1.867	0.391	0.793	0.000	0.000	0.000	0.000	0.000	0.000	0.000	0.000	0.000	0.000	0.000	0.000	0.000	0.000	156	732	2585	2746	-1.047	Error	Error	843	1742	0	0	877	1869	0	0	0	0
2	16	1	""	"YBR158W"	9770	13340	140	1486	1466	685	93	116	159	93	88	0	2513	2505	1327	98	120	171	91	89	0	0	0	0	0	0	0	0	0	0	0	0	0	0	0	0	0	0	0	0.577	0.570	0.577	0.626	1.817	0.507	0.835	0.000	0.000	0.000	0.000	0.000	0.000	0.000	0.000	0.000	0.000	0.000	0.000	0.000	0.000	156	619	3808	3780	-0.794	Error	Error	1393	2415	0	0	1373	2407	0	0	0	0
2	17	1	"RPS9B"	"YBR189W"	9970	13340	140	1474	1430	684	100	131	163	91	89	0	4027	3748	1786	106	146	203	94	93	0	0	0	0	0	0	0	0	0	0	0	0	0	0	0	0	0	0	0	0.350	0.365	0.384	0.363	1.771	0.345	0.835	0.000	0.000	0.000	0.000	0.000	0.000	0.000	0.000	0.000	0.000	0.000	0.000	0.000	0.000	156	632	5295	4972	-1.513	Error	Error	1374	3921	0	0	1330	3642	0	0	0	0
2	18	1	"pdb1"	"YBR221C"	10130	13340	140	1035	1044	548	102	130	95	91	89	0	2909	2917	1790	110	168	200	91	88	0	0	0	0	0	0	0	0	0	0	0	0	0	0	0	0	0	0	0	0.333	0.336	0.336	0.378	2.041	0.297	0.838	0.000	0.000	0.000	0.000	0.000	0.000	0.000	0.000	0.000	0.000	0.000	0.000	0.000	0.000	156	593	3732	3749	-1.585	Error	Error	933	2799	0	0	942	2807	0	0	0	0
2	19	1	"cdc28"	"YBR160W"	10320	13340	140	2208	2258	1231	100	115	76	98	97	0	5011	5197	3079	101	146	267	95	91	0	0	0	0	0	0	0	0	0	0	0	0	0	0	0	0	0	0	0	0.429	0.423	0.433	0.465	1.836	0.390	0.822	0.000	0.000	0.000	0.000	0.000	0.000	0.000	0.000	0.000	0.000	0.000	0.000	0.000	0.000	156	662	7018	7254	-1.220	Error	Error	2108	4910	0	0	2158	5096	0	0	0	0
2	20	1	"RPL21A"	"YBR191W"	10520	13340	140	2701	2601	1371	93	101	46	99	96	0	3719	3467	2033	100	119	237	86	83	0	0	0	0	0	0	0	0	0	0	0	0	0	0	0	0	0	0	0	0.721	0.745	0.763	0.862	2.007	0.677	0.802	0.000	0.000	0.000	0.000	0.000	0.000	0.000	0.000	0.000	0.000	0.000	0.000	0.000	0.000	156	684	6227	5875	-0.473	Error	Error	2608	3619	0	0	2508	3367	0	0	0	0
2	21	1	""	"YBR223C"	10710	13340	140	1062	1095	599	88	93	38	95	92	0	2702	2829	1801	99	107	102	92	85	0	0	0	0	0	0	0	0	0	0	0	0	0	0	0	0	0	0	0	0.374	0.369	0.376	0.415	2.089	0.297	0.772	0.000	0.000	0.000	0.000	0.000	0.000	0.000	0.000	0.000	0.000	0.000	0.000	0.000	0.000	156	653	3577	3737	-1.418	Error	Error	974	2603	0	0	1007	2730	0	0	0	0
2	22	1	""	"YBR162C"	10880	13350	140	3471	3609	1885	89	95	38	100	98	0	4273	4388	2633	97	104	41	96	96	0	0	0	0	0	0	0	0	0	0	0	0	0	0	0	0	0	0	0	0.810	0.820	0.826	0.948	2.110	0.764	0.849	0.000	0.000	0.000	0.000	0.000	0.000	0.000	0.000	0.000	0.000	0.000	0.000	0.000	0.000	156	796	7558	7811	-0.304	Error	Error	3382	4176	0	0	3520	4291	0	0	0	0
2	1	2	"MED8"	"YBR193C"	6930	13540	150	8337	8220	5273	116	134	155	99	96	0	2520	2376	1544	109	128	181	87	84	0	0	0	0	0	0	0	0	0	0	0	0	0	0	0	0	0	0	0	3.410	3.575	3.651	3.917	1.688	3.684	0.885	0.000	0.000	0.000	0.000	0.000	0.000	0.000	0.000	0.000	0.000	0.000	0.000	0.000	0.000	156	741	10632	10371	1.770	Error	Error	8221	2411	0	0	8104	2267	0	0	0	0
2	2	2	""	"YBR225W"	7090	13530	150	7229	8442	7757	116	145	191	95	92	0	4946	5296	4529	109	133	213	87	82	0	0	0	0	0	0	0	0	0	0	0	0	0	0	0	0	0	0	0	1.471	1.605	1.680	1.957	2.363	1.684	0.833	0.000	0.000	0.000	0.000	0.000	0.000	0.000	0.000	0.000	0.000	0.000	0.000	0.000	0.000	156	530	11950	13513	0.556	Error	Error	7113	4837	0	0	8326	5187	0	0	0	0
2	3	2	""	"YDL062W"	7280	13530	150	1144	1064	453	110	141	204	89	83	0	2359	2139	975	106	145	389	89	82	0	0	0	0	0	0	0	0	0	0	0	0	0	0	0	0	0	0	0	0.459	0.469	0.470	0.508	1.984	0.451	0.880	0.000	0.000	0.000	0.000	0.000	0.000	0.000	0.000	0.000	0.000	0.000	0.000	0.000	0.000	156	580	3287	2987	-1.124	Error	Error	1034	2253	0	0	954	2033	0	0	0	0
2	4	2	""	"YDL094C"	7470	13530	150	3719	3315	1546	105	135	208	94	89	0	4347	3733	1901	108	148	407	89	83	0	0	0	0	0	0	0	0	0	0	0	0	0	0	0	0	0	0	0	0.853	0.886	0.910	1.018	2.001	0.866	0.898	0.000	0.000	0.000	0.000	0.000	0.000	0.000	0.000	0.000	0.000	0.000	0.000	0.000	0.000	156	527	7853	6835	-0.230	Error	Error	3614	4239	0	0	3210	3625	0	0	0	0
2	5	2	"CDC48"	"YDL126C"	7650	13530	150	6603	7218	4443	103	127	104	97	95	0	5582	5966	3922	108	130	98	96	94	0	0	0	0	0	0	0	0	0	0	0	0	0	0	0	0	0	0	0	1.187	1.215	1.195	1.311	1.814	1.136	0.848	0.000	0.000	0.000	0.000	0.000	0.000	0.000	0.000	0.000	0.000	0.000	0.000	0.000	0.000	156	556	11974	12973	0.248	Error	Error	6500	5474	0	0	7115	5858	0	0	0	0
2	6	2	"UBC9"	"YDL064W"	7850	13540	140	3094	2889	1042	103	119	86	98	97	0	2427	2200	891	104	127	98	94	94	0	0	0	0	0	0	0	0	0	0	0	0	0	0	0	0	0	0	0	1.288	1.329	1.319	1.421	1.700	1.288	0.926	0.000	0.000	0.000	0.000	0.000	0.000	0.000	0.000	0.000	0.000	0.000	0.000	0.000	0.000	156	551	5314	4882	0.365	Error	Error	2991	2323	0	0	2786	2096	0	0	0	0
2	7	2	""	"YDL096C"	8050	13540	140	1522	1369	566	97	103	49	98	95	0	3981	3559	1545	99	108	44	98	97	0	0	0	0	0	0	0	0	0	0	0	0	0	0	0	0	0	0	0	0.367	0.368	0.365	0.387	1.812	0.342	0.880	0.000	0.000	0.000	0.000	0.000	0.000	0.000	0.000	0.000	0.000	0.000	0.000	0.000	0.000	156	606	5307	4732	-1.446	Error	Error	1425	3882	0	0	1272	3460	0	0	0	0
2	8	2	"VCX1"	"YDL128W"	8230	13540	140	2480	3097	2182	97	105	55	100	98	0	2826	3494	2607	100	110	56	94	92	0	0	0	0	0	0	0	0	0	0	0	0	0	0	0	0	0	0	0	0.874	0.884	0.865	0.991	1.999	0.857	0.843	0.000	0.000	0.000	0.000	0.000	0.000	0.000	0.000	0.000	0.000	0.000	0.000	0.000	0.000	156	519	5109	6394	-0.194	Error	Error	2383	2726	0	0	3000	3394	0	0	0	0
2	9	2	"IDP1"	"YDL066W"	8430	13540	140	4460	3951	1497	99	114	128	100	98	0	3362	3035	1228	103	130	148	94	91	0	0	0	0	0	0	0	0	0	0	0	0	0	0	0	0	0	0	0	1.338	1.314	1.321	1.439	1.682	1.293	0.936	0.000	0.000	0.000	0.000	0.000	0.000	0.000	0.000	0.000	0.000	0.000	0.000	0.000	0.000	156	579	7620	6784	0.420	Error	Error	4361	3259	0	0	3852	2932	0	0	0	0
2	10	2	"SNU23"	"YDL098C"	8600	13540	150	2577	2472	1151	98	114	128	96	92	0	3426	3147	1544	101	133	178	90	89	0	0	0	0	0	0	0	0	0	0	0	0	0	0	0	0	0	0	0	0.746	0.779	0.761	0.852	2.074	0.748	0.894	0.000	0.000	0.000	0.000	0.000	0.000	0.000	0.000	0.000	0.000	0.000	0.000	0.000	0.000	156	616	5804	5420	-0.424	Error	Error	2479	3325	0	0	2374	3046	0	0	0	0
2	11	2	"RPP1B"	"YDL130W"	8790	13540	150	994	1002	518	97	104	54	94	91	0	1708	1802	1048	101	113	116	91	88	0	0	0	0	0	0	0	0	0	0	0	0	0	0	0	0	0	0	0	0.558	0.532	0.559	0.582	1.816	0.483	0.815	0.000	0.000	0.000	0.000	0.000	0.000	0.000	0.000	0.000	0.000	0.000	0.000	0.000	0.000	156	598	2504	2606	-0.841	Error	Error	897	1607	0	0	905	1701	0	0	0	0
2	12	2	""	"YDL068W"	8970	13540	150	6267	5619	2270	95	140	384	98	94	0	2687	2335	1030	95	160	700	84	80	0	0	0	0	0	0	0	0	0	0	0	0	0	0	0	0	0	0	0	2.381	2.466	2.456	2.688	1.715	2.392	0.879	0.000	0.000	0.000	0.000	0.000	0.000	0.000	0.000	0.000	0.000	0.000	0.000	0.000	0.000	156	592	8764	7764	1.252	Error	Error	6172	2592	0	0	5524	2240	0	0	0	0
2	13	2	""	"YDL100C"	9200	13550	130	2814	2295	1603	92	144	418	75	70	0	5719	4570	3343	94	171	762	70	69	0	0	0	0	0	0	0	0	0	0	0	0	0	0	0	0	0	0	0	0.484	0.492	0.517	0.586	2.605	0.452	0.855	0.000	0.000	0.000	0.000	0.000	0.000	0.000	0.000	0.000	0.000	0.000	0.000	0.000	0.000	120	499	8347	6679	-1.047	Error	Error	2722	5625	0	0	2203	4476	0	0	0	0
2	14	2	"LYS21"	"YDL131W"	9360	13530	150	1820	1522	1046	93	100	53	91	88	0	4164	3500	2748	99	121	178	83	76	0	0	0	0	0	0	0	0	0	0	0	0	0	0	0	0	0	0	0	0.425	0.420	0.454	0.575	2.576	0.391	0.855	0.000	0.000	0.000	0.000	0.000	0.000	0.000	0.000	0.000	0.000	0.000	0.000	0.000	0.000	156	619	5792	4830	-1.235	Error	Error	1727	4065	0	0	1429	3401	0	0	0	0
2	15	2	"CCT6"	"YDR188W"	9590	13540	140	2061	1968	1238	93	102	53	92	90	0	4221	4000	2705	99	125	194	87	84	0	0	0	0	0	0	0	0	0	0	0	0	0	0	0	0	0	0	0	0.477	0.481	0.465	0.538	2.281	0.437	0.851	0.000	0.000	0.000	0.000	0.000	0.000	0.000	0.000	0.000	0.000	0.000	0.000	0.000	0.000	156	502	6090	5776	-1.067	Error	Error	1968	4122	0	0	1875	3901	0	0	0	0
2	16	2	"adr1"	"YDR216W"	9750	13540	140	3264	4144	3757	99	111	76	99	98	0	1875	2401	2131	103	125	163	90	88	0	0	0	0	0	0	0	0	0	0	0	0	0	0	0	0	0	0	0	1.786	1.760	1.712	1.851	1.725	1.882	0.748	0.000	0.000	0.000	0.000	0.000	0.000	0.000	0.000	0.000	0.000	0.000	0.000	0.000	0.000	156	350	4937	6343	0.837	Error	Error	3165	1772	0	0	4045	2298	0	0	0	0
2	17	2	""	"YDR248C"	9940	13540	150	2698	2940	1855	115	149	165	94	93	0	1123	1221	697	119	174	234	88	83	0	0	0	0	0	0	0	0	0	0	0	0	0	0	0	0	0	0	0	2.573	2.564	2.479	2.488	1.633	2.980	0.736	0.000	0.000	0.000	0.000	0.000	0.000	0.000	0.000	0.000	0.000	0.000	0.000	0.000	0.000	156	436	3587	3927	1.363	Error	Error	2583	1004	0	0	2825	1102	0	0	0	0
2	18	2	""	"YDR190C"	10140	13540	140	7705	8018	5533	111	134	88	98	97	0	3945	4095	2740	114	162	202	87	84	0	0	0	0	0	0	0	0	0	0	0	0	0	0	0	0	0	0	0	1.982	1.986	1.912	2.053	1.898	2.145	0.823	0.000	0.000	0.000	0.000	0.000	0.000	0.000	0.000	0.000	0.000	0.000	0.000	0.000	0.000	156	387	11425	11888	0.987	Error	Error	7594	3831	0	0	7907	3981	0	0	0	0
2	19	2	"SPR28"	"YDR218C"	10310	13530	150	1956	2143	1730	106	163	369	73	66	0	4099	4181	3634	108	278	954	66	62	0	0	0	0	0	0	0	0	0	0	0	0	0	0	0	0	0	0	0	0.464	0.500	0.523	0.653	2.715	0.461	0.849	0.000	0.000	0.000	0.000	0.000	0.000	0.000	0.000	0.000	0.000	0.000	0.000	0.000	0.000	156	490	5841	6110	-1.109	Error	Error	1850	3991	0	0	2037	4073	0	0	0	0
2	20	2	""	"YDR250C"	10540	13540	140	2755	2509	1256	102	154	360	89	85	0	3598	3036	1648	108	252	900	79	73	0	0	0	0	0	0	0	0	0	0	0	0	0	0	0	0	0	0	0	0.760	0.822	0.812	0.913	1.985	0.768	0.866	0.000	0.000	0.000	0.000	0.000	0.000	0.000	0.000	0.000	0.000	0.000	0.000	0.000	0.000	156	514	6143	5335	-0.396	Error	Error	2653	3490	0	0	2407	2928	0	0	0	0
2	21	2	"NUP42"	"YDR192C"	10690	13550	120	3452	3816	3109	95	105	48	97	95	0	3722	3706	3180	107	112	39	92	84	0	0	0	0	0	0	0	0	0	0	0	0	0	0	0	0	0	0	0	0.929	1.034	1.091	1.321	3.021	1.004	0.892	0.000	0.000	0.000	0.000	0.000	0.000	0.000	0.000	0.000	0.000	0.000	0.000	0.000	0.000	120	405	6972	7320	-0.107	Error	Error	3357	3615	0	0	3721	3599	0	0	0	0
2	22	2	""	"YDR220C"	10910	13540	140	758	691	470	99	134	374	64	41	0	2046	1760	1272	105	137	293	71	66	0	0	0	0	0	0	0	0	0	0	0	0	0	0	0	0	0	0	0	0.340	0.358	0.369	0.373	2.374	0.345	0.843	0.000	0.000	0.000	0.000	0.000	0.000	0.000	0.000	0.000	0.000	0.000	0.000	0.000	0.000	156	789	2600	2247	-1.558	Error	Error	659	1941	0	0	592	1655	0	0	0	0
2	1	3	"BTT1"	"YDR252W"	6940	13730	130	5183	4693	2395	110	124	167	98	95	0	5041	5023	2940	107	127	211	91	89	0	0	0	0	0	0	0	0	0	0	0	0	0	0	0	0	0	0	0	1.028	0.932	0.966	1.018	1.661	0.874	0.880	0.000	0.000	0.000	0.000	0.000	0.000	0.000	0.000	0.000	0.000	0.000	0.000	0.000	0.000	120	525	10007	9499	0.040	Error	Error	5073	4934	0	0	4583	4916	0	0	0	0
2	2	3	"MSS116"	"YDR194C"	7090	13740	120	2436	2712	2334	113	129	192	85	79	0	3639	4112	3632	106	130	241	84	79	0	0	0	0	0	0	0	0	0	0	0	0	0	0	0	0	0	0	0	0.658	0.649	0.668	0.704	2.301	0.640	0.920	0.000	0.000	0.000	0.000	0.000	0.000	0.000	0.000	0.000	0.000	0.000	0.000	0.000	0.000	120	392	5856	6605	-0.605	Error	Error	2323	3533	0	0	2599	4006	0	0	0	0
2	3	3	""	"YDR222W"	7280	13730	150	3385	3715	2180	114	154	281	96	93	0	5232	5031	2982	110	186	565	91	87	0	0	0	0	0	0	0	0	0	0	0	0	0	0	0	0	0	0	0	0.639	0.732	0.731	0.794	1.889	0.722	0.891	0.000	0.000	0.000	0.000	0.000	0.000	0.000	0.000	0.000	0.000	0.000	0.000	0.000	0.000	156	573	8393	8522	-0.647	Error	Error	3271	5122	0	0	3601	4921	0	0	0	0
2	4	3	"CHL4"	"YDR254W"	7470	13730	150	10587	10413	7194	112	148	267	95	89	0	3610	3625	2487	112	175	527	81	76	0	0	0	0	0	0	0	0	0	0	0	0	0	0	0	0	0	0	0	2.995	2.932	2.913	3.163	1.826	3.037	0.854	0.000	0.000	0.000	0.000	0.000	0.000	0.000	0.000	0.000	0.000	0.000	0.000	0.000	0.000	156	660	13973	13814	1.582	Error	Error	10475	3498	0	0	10301	3513	0	0	0	0
2	5	3	"UBC8"	"YEL012W"	7770	13720	150	7434	6338	2554	104	118	76	97	96	0	6377	5494	2354	109	126	88	95	94	0	0	0	0	0	0	0	0	0	0	0	0	0	0	0	0	0	0	0	1.169	1.158	1.161	1.221	1.609	1.142	0.934	0.000	0.000	0.000	0.000	0.000	0.000	0.000	0.000	0.000	0.000	0.000	0.000	0.000	0.000	156	626	13598	11619	0.226	Error	Error	7330	6268	0	0	6234	5385	0	0	0	0
2	6	3	"GDA1"	"YEL042W"	7940	13730	130	1370	1342	980	99	102	39	96	95	0	2462	2652	2589	101	108	39	97	95	0	0	0	0	0	0	0	0	0	0	0	0	0	0	0	0	0	0	0	0.538	0.487	0.513	0.549	1.823	0.420	0.811	0.000	0.000	0.000	0.000	0.000	0.000	0.000	0.000	0.000	0.000	0.000	0.000	0.000	0.000	120	433	3632	3794	-0.893	Error	Error	1271	2361	0	0	1243	2551	0	0	0	0
2	7	3	""	"YEL073C"	8120	13730	100	195	213	107	96	101	39	80	65	0	209	223	132	97	104	38	77	63	0	0	0	0	0	0	0	0	0	0	0	0	0	0	0	0	0	0	0	0.884	0.929	1.003	1.069	2.462	0.823	0.430	0.000	0.000	0.000	0.000	0.000	0.000	0.000	0.000	0.000	0.000	0.000	0.000	0.000	0.000	80	365	211	243	-0.178	Error	Error	99	112	0	0	117	126	0	0	0	0
2	8	3	""	"YEL014C"	8300	13730	130	1335	1191	521	96	103	47	97	93	0	2877	2412	1128	102	112	61	95	93	0	0	0	0	0	0	0	0	0	0	0	0	0	0	0	0	0	0	0	0.446	0.474	0.480	0.507	1.738	0.454	0.894	0.000	0.000	0.000	0.000	0.000	0.000	0.000	0.000	0.000	0.000	0.000	0.000	0.000	0.000	120	492	4014	3405	-1.163	Error	Error	1239	2775	0	0	1095	2310	0	0	0	0
2	9	3	""	"YEL044W"	8490	13740	110	820	801	313	98	108	62	97	96	0	2348	2142	971	104	141	173	93	90	0	0	0	0	0	0	0	0	0	0	0	0	0	0	0	0	0	0	0	0.322	0.345	0.353	0.390	2.015	0.313	0.854	0.000	0.000	0.000	0.000	0.000	0.000	0.000	0.000	0.000	0.000	0.000	0.000	0.000	0.000	80	455	2966	2741	-1.636	Error	Error	722	2244	0	0	703	2038	0	0	0	0
2	10	3	""	"YEL075C"	8670	13730	120	12343	10742	5420	99	110	70	100	100	0	26456	22262	12301	105	138	191	99	95	0	0	0	0	0	0	0	0	0	0	0	0	0	0	0	0	0	0	0	0.465	0.480	0.491	0.541	1.813	0.455	0.919	0.000	0.000	0.000	0.000	0.000	0.000	0.000	0.000	0.000	0.000	0.000	0.000	0.000	0.000	120	475	38595	32800	-1.106	Error	Error	12244	26351	0	0	10643	22157	0	0	0	0
2	11	3	""	"YEL016C"	8890	13730	150	5761	5882	2911	99	107	42	100	100	0	9502	9232	5320	104	111	37	98	98	0	0	0	0	0	0	0	0	0	0	0	0	0	0	0	0	0	0	0	0.602	0.634	0.642	0.766	2.181	0.591	0.914	0.000	0.000	0.000	0.000	0.000	0.000	0.000	0.000	0.000	0.000	0.000	0.000	0.000	0.000	156	520	15060	14911	-0.731	Error	Error	5662	9398	0	0	5783	9128	0	0	0	0
2	12	3	"GLY1"	"YEL046C"	9070	13720	130	3302	3076	1176	105	202	526	94	90	0	7120	6462	2623	107	285	1048	94	89	0	0	0	0	0	0	0	0	0	0	0	0	0	0	0	0	0	0	0	0.456	0.468	0.468	0.496	1.586	0.451	0.911	0.000	0.000	0.000	0.000	0.000	0.000	0.000	0.000	0.000	0.000	0.000	0.000	0.000	0.000	120	498	10210	9326	-1.133	Error	Error	3197	7013	0	0	2971	6355	0	0	0	0
2	13	3	""	"YEL076C-A"	9250	13730	130	11897	10881	4061	99	124	300	100	99	0	29657	25879	10328	104	140	596	98	96	0	0	0	0	0	0	0	0	0	0	0	0	0	0	0	0	0	0	0	0.399	0.418	0.426	0.448	1.559	0.405	0.926	0.000	0.000	0.000	0.000	0.000	0.000	0.000	0.000	0.000	0.000	0.000	0.000	0.000	0.000	120	516	41351	36557	-1.325	Error	Error	11798	29553	0	0	10782	25775	0	0	0	0
2	14	3	""	"YEL017W"	9460	13740	110	245	260	100	97	106	53	91	73	0	353	382	170	101	122	174	73	27	0	0	0	0	0	0	0	0	0	0	0	0	0	0	0	0	0	0	0	0.587	0.580	0.575	0.562	1.867	0.518	0.555	0.000	0.000	0.000	0.000	0.000	0.000	0.000	0.000	0.000	0.000	0.000	0.000	0.000	0.000	80	488	400	444	-0.768	Error	Error	148	252	0	0	163	281	0	0	0	0
2	15	3	""	"YEL048C"	9640	13720	150	2670	2229	1265	97	105	42	91	87	0	3063	2480	1570	104	113	48	85	82	0	0	0	0	0	0	0	0	0	0	0	0	0	0	0	0	0	0	0	0.870	0.897	0.883	1.015	1.965	0.843	0.927	0.000	0.000	0.000	0.000	0.000	0.000	0.000	0.000	0.000	0.000	0.000	0.000	0.000	0.000	156	483	5532	4508	-0.202	Error	Error	2573	2959	0	0	2132	2376	0	0	0	0
2	16	3	""	"YEL077C"	9830	13720	150	21150	24689	15922	104	114	72	96	95	0	23824	26935	16395	109	128	149	95	94	0	0	0	0	0	0	0	0	0	0	0	0	0	0	0	0	0	0	0	0.887	0.916	0.902	0.874	1.636	0.928	0.916	0.000	0.000	0.000	0.000	0.000	0.000	0.000	0.000	0.000	0.000	0.000	0.000	0.000	0.000	156	426	44761	51411	-0.172	Error	Error	21046	23715	0	0	24585	26826	0	0	0	0
2	17	3	"RPL29"	"YFR032C-A"	10030	13720	140	496	489	309	105	111	46	78	72	0	1107	962	727	107	117	45	76	73	0	0	0	0	0	0	0	0	0	0	0	0	0	0	0	0	0	0	0	0.391	0.449	0.461	0.537	2.843	0.402	0.837	0.000	0.000	0.000	0.000	0.000	0.000	0.000	0.000	0.000	0.000	0.000	0.000	0.000	0.000	156	423	1391	1239	-1.355	Error	Error	391	1000	0	0	384	855	0	0	0	0
2	18	3	""	"YGL007W"	10220	13730	140	879	834	472	106	139	306	73	60	0	3634	3051	1873	107	166	659	77	72	0	0	0	0	0	0	0	0	0	0	0	0	0	0	0	0	0	0	0	0.219	0.247	0.252	0.310	3.013	0.236	0.881	0.000	0.000	0.000	0.000	0.000	0.000	0.000	0.000	0.000	0.000	0.000	0.000	0.000	0.000	156	396	4300	3672	-2.190	Error	Error	773	3527	0	0	728	2944	0	0	0	0
2	19	3	""	"YGL039W"	10400	13730	140	7020	6362	3592	108	162	374	91	88	0	3356	2894	1620	108	257	932	79	69	0	0	0	0	0	0	0	0	0	0	0	0	0	0	0	0	0	0	0	2.128	2.245	2.242	2.355	1.903	2.250	0.830	0.000	0.000	0.000	0.000	0.000	0.000	0.000	0.000	0.000	0.000	0.000	0.000	0.000	0.000	156	472	10160	9040	1.090	Error	Error	6912	3248	0	0	6254	2786	0	0	0	0
2	20	3	"pho4"	"YFR034C"	10620	13730	140	4380	5883	4552	106	115	55	98	96	0	5577	5163	3152	104	112	42	95	88	0	0	0	0	0	0	0	0	0	0	0	0	0	0	0	0	0	0	0	0.781	1.142	1.199	1.189	2.514	1.288	0.816	0.000	0.000	0.000	0.000	0.000	0.000	0.000	0.000	0.000	0.000	0.000	0.000	0.000	0.000	156	420	9747	10836	-0.357	Error	Error	4274	5473	0	0	5777	5059	0	0	-100	0
2	21	3	"leu1"	"YGL009C"	10760	13730	110	14158	13780	7077	111	122	65	100	100	0	6282	6221	3039	108	115	43	100	100	0	0	0	0	0	0	0	0	0	0	0	0	0	0	0	0	0	0	0	2.275	2.236	2.177	2.195	1.296	2.288	0.956	0.000	0.000	0.000	0.000	0.000	0.000	0.000	0.000	0.000	0.000	0.000	0.000	0.000	0.000	80	368	20221	19782	1.186	Error	Error	14047	6174	0	0	13669	6113	0	0	0	0
2	22	3	""	"YGL041C"	10960	13740	110	6958	6541	2014	116	173	475	100	100	0	3307	3247	1169	111	173	398	98	95	0	0	0	0	0	0	0	0	0	0	0	0	0	0	0	0	0	0	0	2.141	2.049	2.101	2.185	1.645	1.986	0.882	0.000	0.000	0.000	0.000	0.000	0.000	0.000	0.000	0.000	0.000	0.000	0.000	0.000	0.000	80	490	10038	9561	1.098	Error	Error	6842	3196	0	0	6425	3136	0	0	0	0
2	1	4	"cdc26"	"YFR036W"	6970	13920	120	2672	2402	893	98	105	42	100	100	0	3203	2792	1134	102	112	49	98	96	0	0	0	0	0	0	0	0	0	0	0	0	0	0	0	0	0	0	0	0.830	0.857	0.848	0.911	1.620	0.838	0.921	0.000	0.000	0.000	0.000	0.000	0.000	0.000	0.000	0.000	0.000	0.000	0.000	0.000	0.000	120	544	5675	4994	-0.269	Error	Error	2574	3101	0	0	2304	2690	0	0	0	0
2	2	4	"SCL1"	"YGL011C"	7160	13920	130	13899	12380	4582	106	115	58	100	100	0	6224	5440	2210	103	113	41	100	100	0	0	0	0	0	0	0	0	0	0	0	0	0	0	0	0	0	0	0	2.253	2.300	2.285	2.504	1.607	2.298	0.917	0.000	0.000	0.000	0.000	0.000	0.000	0.000	0.000	0.000	0.000	0.000	0.000	0.000	0.000	120	505	19914	17611	1.172	Error	Error	13793	6121	0	0	12274	5337	0	0	0	0
2	3	4	"dst1"	"YGL043W"	7360	13930	110	3166	3355	1838	110	123	72	100	100	0	3595	3805	2234	109	121	67	100	98	0	0	0	0	0	0	0	0	0	0	0	0	0	0	0	0	0	0	0	0.877	0.878	0.875	0.923	1.542	0.840	0.876	0.000	0.000	0.000	0.000	0.000	0.000	0.000	0.000	0.000	0.000	0.000	0.000	0.000	0.000	80	415	6542	6941	-0.190	Error	Error	3056	3486	0	0	3245	3696	0	0	0	0
2	4	4	""	"YFR038W"	7540	13920	140	5164	5518	3074	105	115	53	100	100	0	4724	4870	2833	108	117	49	98	96	0	0	0	0	0	0	0	0	0	0	0	0	0	0	0	0	0	0	0	1.096	1.137	1.162	1.224	1.981	1.125	0.915	0.000	0.000	0.000	0.000	0.000	0.000	0.000	0.000	0.000	0.000	0.000	0.000	0.000	0.000	156	590	9675	10175	0.132	Error	Error	5059	4616	0	0	5413	4762	0	0	0	0
2	5	4	"PDR1"	"YGL013C"	7740	13920	130	7932	9591	6979	100	103	39	100	100	0	2995	3564	2797	103	110	37	98	95	0	0	0	0	0	0	0	0	0	0	0	0	0	0	0	0	0	0	0	2.708	2.742	3.024	3.183	1.727	2.724	0.903	0.000	0.000	0.000	0.000	0.000	0.000	0.000	0.000	0.000	0.000	0.000	0.000	0.000	0.000	120	477	10724	12952	1.437	Error	Error	7832	2892	0	0	9491	3461	0	0	0	0
2	6	4	""	"YGL045W"	7920	13920	140	7663	8314	4671	100	104	39	100	100	0	5399	5772	3602	102	109	38	97	96	0	0	0	0	0	0	0	0	0	0	0	0	0	0	0	0	0	0	0	1.428	1.449	1.436	1.655	1.817	1.402	0.921	0.000	0.000	0.000	0.000	0.000	0.000	0.000	0.000	0.000	0.000	0.000	0.000	0.000	0.000	156	550	12860	13884	0.514	Error	Error	7563	5297	0	0	8214	5670	0	0	0	0
2	7	4	"PRP31"	"YGR091W"	8140	13920	140	2698	2513	1230	99	103	40	99	98	0	4796	4334	2574	98	105	37	92	90	0	0	0	0	0	0	0	0	0	0	0	0	0	0	0	0	0	0	0	0.553	0.570	0.576	0.768	2.582	0.522	0.930	0.000	0.000	0.000	0.000	0.000	0.000	0.000	0.000	0.000	0.000	0.000	0.000	0.000	0.000	156	553	7297	6650	-0.854	Error	Error	2599	4698	0	0	2414	4236	0	0	0	0
2	8	4	"MEP1"	"YGR121C"	8330	13920	140	2126	2380	1745	96	102	41	95	92	0	5486	5089	3887	99	110	87	91	86	0	0	0	0	0	0	0	0	0	0	0	0	0	0	0	0	0	0	0	0.377	0.458	0.477	0.556	2.921	0.443	0.917	0.000	0.000	0.000	0.000	0.000	0.000	0.000	0.000	0.000	0.000	0.000	0.000	0.000	0.000	156	535	7417	7274	-1.408	Error	Error	2030	5387	0	0	2284	4990	0	0	0	0
2	9	4	"rsr1"	"YGR152C"	8510	13930	100	960	987	419	99	107	61	100	98	0	1350	1325	713	99	117	101	98	95	0	0	0	0	0	0	0	0	0	0	0	0	0	0	0	0	0	0	0	0.688	0.724	0.716	0.765	1.548	0.653	0.771	0.000	0.000	0.000	0.000	0.000	0.000	0.000	0.000	0.000	0.000	0.000	0.000	0.000	0.000	80	349	2112	2114	-0.539	Error	Error	861	1251	0	0	888	1226	0	0	0	0
2	10	4	""	"YGR093W"	8690	13920	150	2322	2249	1069	99	107	55	100	98	0	4393	4248	2397	102	114	82	95	92	0	0	0	0	0	0	0	0	0	0	0	0	0	0	0	0	0	0	0	0.518	0.519	0.513	0.616	2.107	0.478	0.912	0.000	0.000	0.000	0.000	0.000	0.000	0.000	0.000	0.000	0.000	0.000	0.000	0.000	0.000	156	565	6514	6296	-0.949	Error	Error	2223	4291	0	0	2150	4146	0	0	0	0
2	11	4	""	"YGR122W"	8880	13920	140	8339	7699	4226	101	107	41	100	100	0	6152	5623	3266	104	111	38	96	94	0	0	0	0	0	0	0	0	0	0	0	0	0	0	0	0	0	0	0	1.362	1.377	1.415	1.608	2.276	1.371	0.914	0.000	0.000	0.000	0.000	0.000	0.000	0.000	0.000	0.000	0.000	0.000	0.000	0.000	0.000	156	556	14286	13117	0.446	Error	Error	8238	6048	0	0	7598	5519	0	0	0	0
2	12	4	""	"YGR154C"	9060	13930	110	3266	2897	1902	103	208	475	76	72	0	6536	5866	3922	109	372	1172	77	72	0	0	0	0	0	0	0	0	0	0	0	0	0	0	0	0	0	0	0	0.492	0.485	0.488	0.521	2.131	0.455	0.874	0.000	0.000	0.000	0.000	0.000	0.000	0.000	0.000	0.000	0.000	0.000	0.000	0.000	0.000	80	490	9590	8551	-1.023	Error	Error	3163	6427	0	0	2794	5757	0	0	0	0
2	13	4	"RRP46"	"YGR095C"	9290	13920	140	5342	5350	2762	99	187	427	96	93	0	2526	2323	1249	103	313	1045	79	55	0	0	0	0	0	0	0	0	0	0	0	0	0	0	0	0	0	0	0	2.164	2.365	2.412	2.611	1.829	2.420	0.910	0.000	0.000	0.000	0.000	0.000	0.000	0.000	0.000	0.000	0.000	0.000	0.000	0.000	0.000	156	624	7666	7471	1.114	Error	Error	5243	2423	0	0	5251	2220	0	0	0	0
2	14	4	"ASN2"	"YGR124W"	9450	13930	130	5202	4603	2428	95	106	73	99	98	0	8547	7634	4441	103	111	47	97	96	0	0	0	0	0	0	0	0	0	0	0	0	0	0	0	0	0	0	0	0.605	0.599	0.613	0.736	2.353	0.566	0.904	0.000	0.000	0.000	0.000	0.000	0.000	0.000	0.000	0.000	0.000	0.000	0.000	0.000	0.000	120	489	13551	12039	-0.725	Error	Error	5107	8444	0	0	4508	7531	0	0	0	0
2	15	4	""	"YGR156W"	9630	13920	130	3241	3263	1308	94	103	42	100	100	0	7519	7127	3242	106	114	46	100	100	0	0	0	0	0	0	0	0	0	0	0	0	0	0	0	0	0	0	0	0.425	0.451	0.441	0.487	1.608	0.414	0.907	0.000	0.000	0.000	0.000	0.000	0.000	0.000	0.000	0.000	0.000	0.000	0.000	0.000	0.000	120	501	10560	10190	-1.236	Error	Error	3147	7413	0	0	3169	7021	0	0	0	0
2	16	4	"ASK10"	"YGR097W"	9820	13910	140	1593	1788	1407	98	105	41	90	89	0	775	852	678	104	113	44	83	81	0	0	0	0	0	0	0	0	0	0	0	0	0	0	0	0	0	0	0	2.228	2.259	2.174	2.428	2.097	2.335	0.778	0.000	0.000	0.000	0.000	0.000	0.000	0.000	0.000	0.000	0.000	0.000	0.000	0.000	0.000	156	528	2166	2438	1.156	Error	Error	1495	671	0	0	1690	748	0	0	0	0
2	17	4	""	"YGR126W"	10010	13920	140	3085	3114	1386	99	104	40	100	100	0	2366	2311	1129	101	111	43	98	95	0	0	0	0	0	0	0	0	0	0	0	0	0	0	0	0	0	0	0	1.318	1.364	1.376	1.517	1.770	1.342	0.914	0.000	0.000	0.000	0.000	0.000	0.000	0.000	0.000	0.000	0.000	0.000	0.000	0.000	0.000	156	517	5251	5225	0.399	Error	Error	2986	2265	0	0	3015	2210	0	0	0	0
2	18	4	"MTR3"	"YGR158C"	10200	13920	140	8779	8403	4603	102	109	41	100	100	0	3901	3540	1948	106	113	39	97	95	0	0	0	0	0	0	0	0	0	0	0	0	0	0	0	0	0	0	0	2.286	2.417	2.396	2.579	1.951	2.503	0.901	0.000	0.000	0.000	0.000	0.000	0.000	0.000	0.000	0.000	0.000	0.000	0.000	0.000	0.000	156	476	12472	11735	1.193	Error	Error	8677	3795	0	0	8301	3434	0	0	0	0
2	19	4	""	"YHR113W"	10410	13910	140	2971	2715	1408	105	107	40	96	94	0	6206	5681	2946	107	112	34	96	95	0	0	0	0	0	0	0	0	0	0	0	0	0	0	0	0	0	0	0	0.470	0.468	0.477	0.482	1.768	0.453	0.893	0.000	0.000	0.000	0.000	0.000	0.000	0.000	0.000	0.000	0.000	0.000	0.000	0.000	0.000	156	484	8965	8184	-1.090	Error	Error	2866	6099	0	0	2610	5574	0	0	0	0
2	20	4	""	"YHR143W"	10580	13920	140	3432	3553	1902	103	104	40	99	98	0	3576	3481	2215	103	109	33	96	94	0	0	0	0	0	0	0	0	0	0	0	0	0	0	0	0	0	0	0	0.959	1.021	1.000	1.332	2.469	0.953	0.875	0.000	0.000	0.000	0.000	0.000	0.000	0.000	0.000	0.000	0.000	0.000	0.000	0.000	0.000	156	441	6802	6828	-0.061	Error	Error	3329	3473	0	0	3450	3378	0	0	0	0
2	21	4	"ENO2"	"YHR174W"	10770	13910	140	5832	5307	3045	115	123	61	96	94	0	6342	5805	3504	111	123	47	94	92	0	0	0	0	0	0	0	0	0	0	0	0	0	0	0	0	0	0	0	0.918	0.912	0.948	1.032	1.937	0.889	0.907	0.000	0.000	0.000	0.000	0.000	0.000	0.000	0.000	0.000	0.000	0.000	0.000	0.000	0.000	156	468	11948	10886	-0.124	Error	Error	5717	6231	0	0	5192	5694	0	0	0	0
2	22	4	""	"YHR115C"	10970	13920	150	10485	10275	4332	121	134	80	100	100	0	5332	5093	2255	119	141	154	97	94	0	0	0	0	0	0	0	0	0	0	0	0	0	0	0	0	0	0	0	1.988	2.041	2.048	2.249	1.790	2.007	0.926	0.000	0.000	0.000	0.000	0.000	0.000	0.000	0.000	0.000	0.000	0.000	0.000	0.000	0.000	156	767	15577	15128	0.991	Error	Error	10364	5213	0	0	10154	4974	0	0	0	0
2	1	5	"DCD1"	"YHR144C"	6990	14110	130	4470	3909	1483	101	110	69	100	100	0	5248	4812	1712	102	112	47	100	100	0	0	0	0	0	0	0	0	0	0	0	0	0	0	0	0	0	0	0	0.849	0.808	0.822	0.813	1.408	0.820	0.938	0.000	0.000	0.000	0.000	0.000	0.000	0.000	0.000	0.000	0.000	0.000	0.000	0.000	0.000	120	542	9515	8518	-0.236	Error	Error	4369	5146	0	0	3808	4710	0	0	0	0
2	2	5	""	"YHR176W"	7170	14110	140	4480	4247	1822	105	111	55	100	100	0	5989	5445	2869	103	113	40	98	98	0	0	0	0	0	0	0	0	0	0	0	0	0	0	0	0	0	0	0	0.743	0.775	0.748	0.906	2.110	0.713	0.876	0.000	0.000	0.000	0.000	0.000	0.000	0.000	0.000	0.000	0.000	0.000	0.000	0.000	0.000	156	514	10261	9484	-0.428	Error	Error	4375	5886	0	0	4142	5342	0	0	0	0
2	3	5	"TOM71"	"YHR117W"	7360	14110	140	8468	9025	4994	113	125	67	99	99	0	4174	4431	2743	112	119	45	95	94	0	0	0	0	0	0	0	0	0	0	0	0	0	0	0	0	0	0	0	2.057	2.063	2.068	2.427	2.038	2.020	0.923	0.000	0.000	0.000	0.000	0.000	0.000	0.000	0.000	0.000	0.000	0.000	0.000	0.000	0.000	156	503	12417	13231	1.040	Error	Error	8355	4062	0	0	8912	4319	0	0	0	0
2	4	5	""	"YHR146W"	7560	14110	130	4095	3866	1515	107	119	59	100	100	0	5395	5281	1830	108	116	46	100	100	0	0	0	0	0	0	0	0	0	0	0	0	0	0	0	0	0	0	0	0.754	0.727	0.737	0.706	1.466	0.741	0.926	0.000	0.000	0.000	0.000	0.000	0.000	0.000	0.000	0.000	0.000	0.000	0.000	0.000	0.000	120	396	9275	8932	-0.407	Error	Error	3988	5287	0	0	3759	5173	0	0	0	0
2	5	5	"STB5"	"YHR178W"	7730	14110	140	5218	5416	2657	98	102	38	100	100	0	9913	9931	4983	100	107	36	99	98	0	0	0	0	0	0	0	0	0	0	0	0	0	0	0	0	0	0	0	0.522	0.541	0.560	0.584	1.850	0.527	0.927	0.000	0.000	0.000	0.000	0.000	0.000	0.000	0.000	0.000	0.000	0.000	0.000	0.000	0.000	156	423	14933	15149	-0.939	Error	Error	5120	9813	0	0	5318	9831	0	0	0	0
2	6	5	"SET1"	"YHR119W"	7910	14110	130	6129	6148	3089	96	103	61	100	100	0	12788	12236	6259	100	107	34	100	100	0	0	0	0	0	0	0	0	0	0	0	0	0	0	0	0	0	0	0	0.475	0.499	0.502	0.524	1.575	0.487	0.929	0.000	0.000	0.000	0.000	0.000	0.000	0.000	0.000	0.000	0.000	0.000	0.000	0.000	0.000	120	484	18721	18188	-1.073	Error	Error	6033	12688	0	0	6052	12136	0	0	0	0
2	7	5	"IMP3"	"YHR148W"	8120	14110	130	8836	8319	4491	96	102	60	100	100	0	4279	3846	2178	100	105	33	98	96	0	0	0	0	0	0	0	0	0	0	0	0	0	0	0	0	0	0	0	2.091	2.195	2.216	2.427	1.818	2.220	0.913	0.000	0.000	0.000	0.000	0.000	0.000	0.000	0.000	0.000	0.000	0.000	0.000	0.000	0.000	120	483	12919	11969	1.064	Error	Error	8740	4179	0	0	8223	3746	0	0	0	0
2	8	5	""	"YHR180W"	8280	14110	130	1653	1547	514	95	101	50	99	99	0	1958	1851	635	100	118	113	99	96	0	0	0	0	0	0	0	0	0	0	0	0	0	0	0	0	0	0	0	0.839	0.829	0.832	0.842	1.429	0.817	0.898	0.000	0.000	0.000	0.000	0.000	0.000	0.000	0.000	0.000	0.000	0.000	0.000	0.000	0.000	120	442	3416	3203	-0.254	Error	Error	1558	1858	0	0	1452	1751	0	0	0	0
2	9	5	""	"YJL049W"	8490	14110	140	12293	11759	5661	96	104	51	99	99	0	3510	3012	1548	100	116	106	96	94	0	0	0	0	0	0	0	0	0	0	0	0	0	0	0	0	0	0	0	3.577	4.005	3.990	4.495	1.785	4.039	0.919	0.000	0.000	0.000	0.000	0.000	0.000	0.000	0.000	0.000	0.000	0.000	0.000	0.000	0.000	156	511	15607	14575	1.839	Error	Error	12197	3410	0	0	11663	2912	0	0	0	0
2	10	5	"ARP4"	"YJL081C"	8680	14110	130	16913	16299	6873	99	105	41	100	100	0	6296	6128	2769	101	106	31	100	100	0	0	0	0	0	0	0	0	0	0	0	0	0	0	0	0	0	0	0	2.714	2.688	2.664	2.774	1.454	2.719	0.913	0.000	0.000	0.000	0.000	0.000	0.000	0.000	0.000	0.000	0.000	0.000	0.000	0.000	0.000	120	441	23009	22227	1.440	Error	Error	16814	6195	0	0	16200	6027	0	0	0	0
2	11	5	""	"YJL113W"	8850	14120	130	501	589	478	101	104	37	98	95	0	315	349	271	105	110	34	89	80	0	0	0	0	0	0	0	0	0	0	0	0	0	0	0	0	0	0	0	1.905	2.000	2.142	2.288	2.092	2.012	0.749	0.000	0.000	0.000	0.000	0.000	0.000	0.000	0.000	0.000	0.000	0.000	0.000	0.000	0.000	120	444	610	732	0.930	Error	Error	400	210	0	0	488	244	0	0	0	0
2	12	5	""	"YJL051W"	9040	14120	130	3557	3840	2473	97	116	177	98	96	0	9081	9997	6543	106	157	543	94	93	0	0	0	0	0	0	0	0	0	0	0	0	0	0	0	0	0	0	0	0.386	0.378	0.370	0.403	2.054	0.367	0.930	0.000	0.000	0.000	0.000	0.000	0.000	0.000	0.000	0.000	0.000	0.000	0.000	0.000	0.000	120	480	12435	13634	-1.375	Error	Error	3460	8975	0	0	3743	9891	0	0	0	0
2	13	5	""	"YJL083W"	9230	14120	130	3687	3571	1771	95	118	185	96	94	0	8329	8328	4045	104	153	531	95	91	0	0	0	0	0	0	0	0	0	0	0	0	0	0	0	0	0	0	0	0.437	0.423	0.411	0.429	1.867	0.413	0.921	0.000	0.000	0.000	0.000	0.000	0.000	0.000	0.000	0.000	0.000	0.000	0.000	0.000	0.000	120	502	11817	11700	-1.195	Error	Error	3592	8225	0	0	3476	8224	0	0	0	0
2	14	5	"asf1"	"YJL115W"	9420	14120	130	4808	4207	1749	99	110	80	100	100	0	6826	5929	2568	104	111	45	100	99	0	0	0	0	0	0	0	0	0	0	0	0	0	0	0	0	0	0	0	0.701	0.705	0.705	0.745	1.762	0.687	0.897	0.000	0.000	0.000	0.000	0.000	0.000	0.000	0.000	0.000	0.000	0.000	0.000	0.000	0.000	120	482	11431	9933	-0.513	Error	Error	4709	6722	0	0	4108	5825	0	0	0	0
2	15	5	"PEP8"	"YJL053W"	9630	14120	130	2983	2653	1148	99	106	45	100	99	0	7624	6490	3211	108	116	49	98	97	0	0	0	0	0	0	0	0	0	0	0	0	0	0	0	0	0	0	0	0.384	0.400	0.395	0.469	2.010	0.367	0.891	0.000	0.000	0.000	0.000	0.000	0.000	0.000	0.000	0.000	0.000	0.000	0.000	0.000	0.000	120	460	10400	8936	-1.382	Error	Error	2884	7516	0	0	2554	6382	0	0	0	0
2	16	5	"EXO70"	"YJL085W"	9780	14110	130	12668	12718	5155	98	105	42	100	100	0	6269	6092	2638	108	116	44	100	99	0	0	0	0	0	0	0	0	0	0	0	0	0	0	0	0	0	0	0	2.040	2.109	2.136	2.251	1.620	2.104	0.895	0.000	0.000	0.000	0.000	0.000	0.000	0.000	0.000	0.000	0.000	0.000	0.000	0.000	0.000	120	465	18731	18604	1.029	Error	Error	12570	6161	0	0	12620	5984	0	0	0	0
2	17	5	"PHO86"	"YJL117W"	9980	14120	130	3116	3070	1688	96	103	40	100	97	0	5733	5446	3323	102	116	118	94	89	0	0	0	0	0	0	0	0	0	0	0	0	0	0	0	0	0	0	0	0.536	0.557	0.540	0.624	2.020	0.516	0.900	0.000	0.000	0.000	0.000	0.000	0.000	0.000	0.000	0.000	0.000	0.000	0.000	0.000	0.000	120	552	8651	8318	-0.899	Error	Error	3020	5631	0	0	2974	5344	0	0	0	0
2	18	5	""	"YJL055W"	10190	14110	140	2773	2554	906	98	116	144	98	96	0	9315	8321	3210	105	121	141	98	97	0	0	0	0	0	0	0	0	0	0	0	0	0	0	0	0	0	0	0	0.290	0.299	0.300	0.320	1.669	0.284	0.916	0.000	0.000	0.000	0.000	0.000	0.000	0.000	0.000	0.000	0.000	0.000	0.000	0.000	0.000	156	528	11885	10672	-1.784	Error	Error	2675	9210	0	0	2456	8216	0	0	0	0
2	19	5	"TRL1"	"YJL087C"	10350	14120	130	5046	6240	4605	99	109	87	100	98	0	3929	4885	3682	106	112	36	100	98	0	0	0	0	0	0	0	0	0	0	0	0	0	0	0	0	0	0	0	1.294	1.285	1.286	1.423	1.910	1.289	0.907	0.000	0.000	0.000	0.000	0.000	0.000	0.000	0.000	0.000	0.000	0.000	0.000	0.000	0.000	120	452	8770	10920	0.372	Error	Error	4947	3823	0	0	6141	4779	0	0	0	0
2	20	5	""	"YJL119C"	10550	14110	120	1294	1250	552	94	99	39	99	99	0	3592	3392	1598	104	108	35	99	99	0	0	0	0	0	0	0	0	0	0	0	0	0	0	0	0	0	0	0	0.344	0.352	0.354	0.372	1.968	0.327	0.888	0.000	0.000	0.000	0.000	0.000	0.000	0.000	0.000	0.000	0.000	0.000	0.000	0.000	0.000	120	463	4688	4444	-1.539	Error	Error	1200	3488	0	0	1156	3288	0	0	0	0
2	21	5	"PHD1"	"YKL043W"	10750	14110	140	6273	5414	1952	102	108	53	100	100	0	14714	12714	5066	109	118	46	100	100	0	0	0	0	0	0	0	0	0	0	0	0	0	0	0	0	0	0	0	0.423	0.421	0.419	0.450	1.667	0.406	0.916	0.000	0.000	0.000	0.000	0.000	0.000	0.000	0.000	0.000	0.000	0.000	0.000	0.000	0.000	156	464	20776	17917	-1.243	Error	Error	6171	14605	0	0	5312	12605	0	0	0	0
2	22	5	"MUD2"	"YKL074C"	10920	14110	140	4725	4373	1794	109	118	67	100	100	0	9561	8501	3825	119	134	106	100	98	0	0	0	0	0	0	0	0	0	0	0	0	0	0	0	0	0	0	0	0.489	0.509	0.503	0.553	1.725	0.483	0.906	0.000	0.000	0.000	0.000	0.000	0.000	0.000	0.000	0.000	0.000	0.000	0.000	0.000	0.000	156	568	14058	12646	-1.032	Error	Error	4616	9442	0	0	4264	8382	0	0	0	0
2	1	6	""	"YKL105C"	6940	14300	140	8624	11195	9743	100	111	81	99	99	0	3319	4569	3947	99	109	41	95	95	0	0	0	0	0	0	0	0	0	0	0	0	0	0	0	0	0	0	0	2.647	2.482	2.545	2.614	1.667	2.541	0.915	0.000	0.000	0.000	0.000	0.000	0.000	0.000	0.000	0.000	0.000	0.000	0.000	0.000	0.000	156	674	11744	15565	1.404	Error	Error	8524	3220	0	0	11095	4470	0	0	0	0
2	2	6	"PRI2"	"YKL045W"	7120	14300	140	3161	3006	1389	104	107	43	100	99	0	7892	7325	3626	101	111	40	100	99	0	0	0	0	0	0	0	0	0	0	0	0	0	0	0	0	0	0	0	0.392	0.402	0.406	0.445	1.766	0.383	0.916	0.000	0.000	0.000	0.000	0.000	0.000	0.000	0.000	0.000	0.000	0.000	0.000	0.000	0.000	156	447	10848	10126	-1.350	Error	Error	3057	7791	0	0	2902	7224	0	0	0	0
2	3	6	""	"YKL076C"	7350	14300	140	15138	13501	4741	111	120	60	100	100	0	3440	3091	1161	104	115	55	99	98	0	0	0	0	0	0	0	0	0	0	0	0	0	0	0	0	0	0	0	4.504	4.483	4.574	4.763	1.591	4.527	0.916	0.000	0.000	0.000	0.000	0.000	0.000	0.000	0.000	0.000	0.000	0.000	0.000	0.000	0.000	156	533	18363	16377	2.171	Error	Error	15027	3336	0	0	13390	2987	0	0	0	0
2	4	6	""	"YKL107W"	7530	14290	150	186	343	329	109	122	71	52	39	0	136	198	141	105	143	249	14	1	0	0	0	0	0	0	0	0	0	0	0	0	0	0	0	0	0	0	0	2.484	2.516	2.223	2.003	3.241	2.511	0.438	0.000	0.000	0.000	0.000	0.000	0.000	0.000	0.000	0.000	0.000	0.000	0.000	0.000	0.000	156	471	108	327	1.313	Error	Error	77	31	0	0	234	93	0	0	-50	0
2	5	6	""	"YKL047W"	7700	14300	140	6150	5802	2341	97	115	119	99	99	0	6158	5535	2320	103	147	311	96	92	0	0	0	0	0	0	0	0	0	0	0	0	0	0	0	0	0	0	0	1.000	1.050	1.054	1.131	1.754	1.040	0.934	0.000	0.000	0.000	0.000	0.000	0.000	0.000	0.000	0.000	0.000	0.000	0.000	0.000	0.000	156	470	12108	11137	0.000	Error	Error	6053	6055	0	0	5705	5432	0	0	0	0
2	6	6	""	"YKL078W"	7890	14300	140	5648	6349	4507	98	113	107	98	97	0	8470	8880	6342	108	126	187	94	94	0	0	0	0	0	0	0	0	0	0	0	0	0	0	0	0	0	0	0	0.664	0.713	0.727	0.783	1.950	0.699	0.908	0.000	0.000	0.000	0.000	0.000	0.000	0.000	0.000	0.000	0.000	0.000	0.000	0.000	0.000	156	534	13912	15023	-0.591	Error	Error	5550	8362	0	0	6251	8772	0	0	0	0
2	7	6	"HAP4"	"YKL109W"	8090	14300	140	1882	1721	1138	96	108	79	92	89	0	4555	4020	2681	103	113	42	90	90	0	0	0	0	0	0	0	0	0	0	0	0	0	0	0	0	0	0	0	0.401	0.415	0.428	0.444	2.007	0.406	0.905	0.000	0.000	0.000	0.000	0.000	0.000	0.000	0.000	0.000	0.000	0.000	0.000	0.000	0.000	156	571	6238	5542	-1.318	Error	Error	1786	4452	0	0	1625	3917	0	0	0	0
2	8	6	"CSE4"	"YKL049C"	8280	14300	130	2970	2759	782	93	99	47	100	100	0	5155	4707	1471	102	112	71	100	100	0	0	0	0	0	0	0	0	0	0	0	0	0	0	0	0	0	0	0	0.569	0.579	0.569	0.596	1.319	0.556	0.923	0.000	0.000	0.000	0.000	0.000	0.000	0.000	0.000	0.000	0.000	0.000	0.000	0.000	0.000	120	453	7930	7271	-0.813	Error	Error	2877	5053	0	0	2666	4605	0	0	0	0
2	9	6	"VMA5"	"YKL080W"	8450	14300	140	1635	1476	932	99	103	49	92	91	0	3184	2785	1841	104	120	95	87	86	0	0	0	0	0	0	0	0	0	0	0	0	0	0	0	0	0	0	0	0.499	0.514	0.509	0.583	2.424	0.498	0.897	0.000	0.000	0.000	0.000	0.000	0.000	0.000	0.000	0.000	0.000	0.000	0.000	0.000	0.000	156	486	4616	4058	-1.004	Error	Error	1536	3080	0	0	1377	2681	0	0	0	0
2	10	6	""	"YKL111C"	8640	14300	140	421	418	193	101	106	42	91	85	0	340	339	150	107	118	50	86	81	0	0	0	0	0	0	0	0	0	0	0	0	0	0	0	0	0	0	0	1.373	1.366	1.301	1.295	1.813	1.378	0.716	0.000	0.000	0.000	0.000	0.000	0.000	0.000	0.000	0.000	0.000	0.000	0.000	0.000	0.000	156	538	553	549	0.458	Error	Error	320	233	0	0	317	232	0	0	0	0
2	11	6	"snf7"	"YLR025W"	8850	14300	140	5322	5189	2695	99	103	39	100	100	0	4502	4006	2363	106	114	45	96	92	0	0	0	0	0	0	0	0	0	0	0	0	0	0	0	0	0	0	0	1.188	1.305	1.343	1.735	2.528	1.261	0.911	0.000	0.000	0.000	0.000	0.000	0.000	0.000	0.000	0.000	0.000	0.000	0.000	0.000	0.000	156	498	9619	8990	0.249	Error	Error	5223	4396	0	0	5090	3900	0	0	0	0
2	12	6	"ERG3"	"YLR056W"	9030	14300	140	1972	1926	835	98	101	34	99	99	0	4871	4818	2059	105	112	40	99	99	0	0	0	0	0	0	0	0	0	0	0	0	0	0	0	0	0	0	0	0.393	0.388	0.392	0.393	1.682	0.379	0.905	0.000	0.000	0.000	0.000	0.000	0.000	0.000	0.000	0.000	0.000	0.000	0.000	0.000	0.000	156	441	6640	6541	-1.347	Error	Error	1874	4766	0	0	1828	4713	0	0	0	0
2	13	6	"GAA1"	"YLR088W"	9210	14300	140	4913	5001	2840	97	100	36	100	100	0	3812	4047	2678	104	111	36	96	95	0	0	0	0	0	0	0	0	0	0	0	0	0	0	0	0	0	0	0	1.299	1.244	1.230	1.435	2.026	1.152	0.875	0.000	0.000	0.000	0.000	0.000	0.000	0.000	0.000	0.000	0.000	0.000	0.000	0.000	0.000	156	479	8524	8847	0.377	Error	Error	4816	3708	0	0	4904	3943	0	0	0	0
2	14	6	"AAT2"	"YLR027C"	9410	14300	140	2036	2084	1298	97	102	45	98	94	0	4135	4082	2705	101	106	34	96	94	0	0	0	0	0	0	0	0	0	0	0	0	0	0	0	0	0	0	0	0.481	0.499	0.501	0.572	2.084	0.480	0.917	0.000	0.000	0.000	0.000	0.000	0.000	0.000	0.000	0.000	0.000	0.000	0.000	0.000	0.000	156	458	5973	5968	-1.057	Error	Error	1939	4034	0	0	1987	3981	0	0	0	0
2	15	6	"SHM2"	"YLR058C"	9590	14300	140	8126	8149	4696	100	106	43	100	100	0	2988	2889	1830	101	107	36	95	94	0	0	0	0	0	0	0	0	0	0	0	0	0	0	0	0	0	0	0	2.780	2.887	2.941	3.339	1.902	2.860	0.905	0.000	0.000	0.000	0.000	0.000	0.000	0.000	0.000	0.000	0.000	0.000	0.000	0.000	0.000	156	469	10913	10837	1.475	Error	Error	8026	2887	0	0	8049	2788	0	0	0	0
2	16	6	"XDJ1"	"YLR090W"	9780	14300	140	7619	7896	4058	102	107	42	100	99	0	5674	5778	2978	105	111	37	98	98	0	0	0	0	0	0	0	0	0	0	0	0	0	0	0	0	0	0	0	1.350	1.374	1.402	1.431	1.694	1.403	0.897	0.000	0.000	0.000	0.000	0.000	0.000	0.000	0.000	0.000	0.000	0.000	0.000	0.000	0.000	156	512	13086	13467	0.433	Error	Error	7517	5569	0	0	7794	5673	0	0	0	0
2	17	6	"RPL15A"	"YLR029C"	9980	14300	120	3300	3085	1266	98	119	149	97	95	0	5530	5113	2248	105	120	144	97	95	0	0	0	0	0	0	0	0	0	0	0	0	0	0	0	0	0	0	0	0.590	0.596	0.604	0.621	1.512	0.577	0.928	0.000	0.000	0.000	0.000	0.000	0.000	0.000	0.000	0.000	0.000	0.000	0.000	0.000	0.000	120	502	8627	7995	-0.761	Error	Error	3202	5425	0	0	2987	5008	0	0	0	0
2	18	6	"FRS1"	"YLR060W"	10200	14300	130	2311	2336	1487	97	130	206	88	85	0	5973	5670	3925	102	114	87	93	90	0	0	0	0	0	0	0	0	0	0	0	0	0	0	0	0	0	0	0	0.377	0.402	0.406	0.455	1.949	0.370	0.875	0.000	0.000	0.000	0.000	0.000	0.000	0.000	0.000	0.000	0.000	0.000	0.000	0.000	0.000	120	491	8085	7807	-1.407	Error	Error	2214	5871	0	0	2239	5568	0	0	0	0
2	19	6	"SUL2"	"YLR092W"	10370	14300	130	6675	7465	3681	97	115	147	100	99	0	5553	5565	2898	99	105	35	98	98	0	0	0	0	0	0	0	0	0	0	0	0	0	0	0	0	0	0	0	1.206	1.348	1.373	1.507	1.981	1.343	0.910	0.000	0.000	0.000	0.000	0.000	0.000	0.000	0.000	0.000	0.000	0.000	0.000	0.000	0.000	120	492	12032	12834	0.270	Error	Error	6578	5454	0	0	7368	5466	0	0	0	0
2	20	6	""	"YLR031W"	10550	14290	130	2204	1971	703	95	100	39	100	100	0	4526	4001	1581	103	107	35	98	98	0	0	0	0	0	0	0	0	0	0	0	0	0	0	0	0	0	0	0	0.477	0.481	0.466	0.513	1.500	0.453	0.903	0.000	0.000	0.000	0.000	0.000	0.000	0.000	0.000	0.000	0.000	0.000	0.000	0.000	0.000	120	532	6532	5774	-1.068	Error	Error	2109	4423	0	0	1876	3898	0	0	0	0
2	21	6	""	"YLR062C"	10750	14290	130	625	614	200	95	102	47	100	95	0	991	922	312	103	108	38	98	97	0	0	0	0	0	0	0	0	0	0	0	0	0	0	0	0	0	0	0	0.597	0.634	0.626	0.642	1.490	0.587	0.835	0.000	0.000	0.000	0.000	0.000	0.000	0.000	0.000	0.000	0.000	0.000	0.000	0.000	0.000	120	500	1418	1338	-0.745	Error	Error	530	888	0	0	519	819	0	0	0	0
2	22	6	"GIS3"	"YLR094C"	10930	14300	140	1580	1651	906	94	100	38	99	97	0	3942	3916	2447	103	109	38	96	94	0	0	0	0	0	0	0	0	0	0	0	0	0	0	0	0	0	0	0	0.387	0.408	0.422	0.484	1.880	0.381	0.922	0.000	0.000	0.000	0.000	0.000	0.000	0.000	0.000	0.000	0.000	0.000	0.000	0.000	0.000	156	654	5325	5370	-1.369	Error	Error	1486	3839	0	0	1557	3813	0	0	0	0
2	1	7	""	"YLR400W"	7000	14490	120	1242	1182	481	100	112	85	95	91	0	4374	3877	1684	98	114	64	96	95	0	0	0	0	0	0	0	0	0	0	0	0	0	0	0	0	0	0	0	0.267	0.286	0.288	0.292	1.474	0.274	0.896	0.000	0.000	0.000	0.000	0.000	0.000	0.000	0.000	0.000	0.000	0.000	0.000	0.000	0.000	120	454	5418	4861	-1.905	Error	Error	1142	4276	0	0	1082	3779	0	0	0	0
2	2	7	"sen1"	"YLR430W"	7150	14480	150	130	152	114	102	108	50	37	18	0	150	194	183	100	112	53	49	26	0	0	0	0	0	0	0	0	0	0	0	0	0	0	0	0	0	0	0	0.560	0.532	0.892	0.798	2.689	0.586	0.521	0.000	0.000	0.000	0.000	0.000	0.000	0.000	0.000	0.000	0.000	0.000	0.000	0.000	0.000	156	584	78	144	-0.837	Error	Error	28	50	0	0	50	94	0	0	-50	0
2	3	7	"PAU4"	"YLR461W"	7370	14490	120	6786	7183	5371	106	112	51	100	100	0	3577	3696	2776	101	115	64	95	92	0	0	0	0	0	0	0	0	0	0	0	0	0	0	0	0	0	0	0	1.922	1.969	2.010	2.033	1.590	2.006	0.920	0.000	0.000	0.000	0.000	0.000	0.000	0.000	0.000	0.000	0.000	0.000	0.000	0.000	0.000	120	513	10156	10672	0.942	Error	Error	6680	3476	0	0	7077	3595	0	0	0	0
2	4	7	""	"YLR402W"	7530	14500	110	1280	1189	497	101	112	65	96	93	0	4718	4138	1833	101	143	270	96	93	0	0	0	0	0	0	0	0	0	0	0	0	0	0	0	0	0	0	0	0.255	0.270	0.269	0.269	1.333	0.257	0.896	0.000	0.000	0.000	0.000	0.000	0.000	0.000	0.000	0.000	0.000	0.000	0.000	0.000	0.000	80	398	5796	5125	-1.969	Error	Error	1179	4617	0	0	1088	4037	0	0	0	0
2	5	7	""	"YLR432W"	7720	14500	130	24457	22378	12838	98	117	115	100	100	0	11588	9766	5983	102	146	290	95	89	0	0	0	0	0	0	0	0	0	0	0	0	0	0	0	0	0	0	0	2.121	2.305	2.321	2.690	2.101	2.310	0.911	0.000	0.000	0.000	0.000	0.000	0.000	0.000	0.000	0.000	0.000	0.000	0.000	0.000	0.000	120	545	35845	31944	1.085	Error	Error	24359	11486	0	0	22280	9664	0	0	0	0
2	6	7	""	"YLR463C"	7910	14500	120	8486	7946	4562	105	127	131	100	98	0	18816	17708	11891	109	133	193	97	96	0	0	0	0	0	0	0	0	0	0	0	0	0	0	0	0	0	0	0	0.448	0.446	0.420	0.525	2.215	0.405	0.900	0.000	0.000	0.000	0.000	0.000	0.000	0.000	0.000	0.000	0.000	0.000	0.000	0.000	0.000	120	510	27088	25440	-1.158	Error	Error	8381	18707	0	0	7841	17599	0	0	0	0
2	7	7	""	"YLR404W"	8130	14490	120	3536	3180	1626	99	112	87	97	95	0	2687	2527	1362	103	115	45	100	93	0	0	0	0	0	0	0	0	0	0	0	0	0	0	0	0	0	0	0	1.330	1.271	1.308	1.313	1.776	1.270	0.907	0.000	0.000	0.000	0.000	0.000	0.000	0.000	0.000	0.000	0.000	0.000	0.000	0.000	0.000	120	469	6021	5505	0.412	Error	Error	3437	2584	0	0	3081	2424	0	0	0	0
2	8	7	""	"YLR434C"	8300	14500	120	2500	2168	998	93	102	53	99	98	0	1820	1623	791	99	108	44	96	93	0	0	0	0	0	0	0	0	0	0	0	0	0	0	0	0	0	0	0	1.399	1.362	1.351	1.444	1.582	1.344	0.909	0.000	0.000	0.000	0.000	0.000	0.000	0.000	0.000	0.000	0.000	0.000	0.000	0.000	0.000	120	489	4128	3599	0.484	Error	Error	2407	1721	0	0	2075	1524	0	0	0	0
2	9	7	""	"YLR465C"	8490	14490	120	4632	4707	2803	101	107	43	97	97	0	13023	12249	7514	106	120	54	99	97	0	0	0	0	0	0	0	0	0	0	0	0	0	0	0	0	0	0	0	0.351	0.379	0.385	0.424	1.785	0.368	0.925	0.000	0.000	0.000	0.000	0.000	0.000	0.000	0.000	0.000	0.000	0.000	0.000	0.000	0.000	120	459	17448	16749	-1.511	Error	Error	4531	12917	0	0	4606	12143	0	0	0	0
2	10	7	"RPL31B"	"YLR406C"	8660	14500	100	353	359	126	100	109	43	96	92	0	425	441	185	110	124	54	93	92	0	0	0	0	0	0	0	0	0	0	0	0	0	0	0	0	0	0	0	0.803	0.782	0.713	0.778	1.879	0.704	0.614	0.000	0.000	0.000	0.000	0.000	0.000	0.000	0.000	0.000	0.000	0.000	0.000	0.000	0.000	80	403	568	590	-0.316	Error	Error	253	315	0	0	259	331	0	0	0	0
2	11	7	"ECM30"	"YLR436C"	8870	14490	140	2940	3381	2413	101	107	43	100	97	0	3069	3435	2583	108	118	49	97	96	0	0	0	0	0	0	0	0	0	0	0	0	0	0	0	0	0	0	0	0.959	0.986	1.009	1.069	1.964	0.965	0.909	0.000	0.000	0.000	0.000	0.000	0.000	0.000	0.000	0.000	0.000	0.000	0.000	0.000	0.000	156	545	5800	6607	-0.061	Error	Error	2839	2961	0	0	3280	3327	0	0	0	0
2	12	7	"YRF1-5"	"YLR467W"	9060	14500	120	5503	6530	5760	100	104	38	100	100	0	5375	6716	6657	103	112	42	96	95	0	0	0	0	0	0	0	0	0	0	0	0	0	0	0	0	0	0	0	1.025	0.972	1.022	1.141	1.913	0.904	0.898	0.000	0.000	0.000	0.000	0.000	0.000	0.000	0.000	0.000	0.000	0.000	0.000	0.000	0.000	120	489	10675	13043	0.035	Error	Error	5403	5272	0	0	6430	6613	0	0	0	0
2	13	7	""	"YMR160W"	9290	14490	140	6802	6999	4353	99	103	39	94	93	0	8140	8127	5633	103	111	41	89	86	0	0	0	0	0	0	0	0	0	0	0	0	0	0	0	0	0	0	0	0.834	0.860	0.860	1.072	2.158	0.811	0.943	0.000	0.000	0.000	0.000	0.000	0.000	0.000	0.000	0.000	0.000	0.000	0.000	0.000	0.000	156	501	14740	14924	-0.262	Error	Error	6703	8037	0	0	6900	8024	0	0	0	0
2	14	7	"SGS1"	"YMR190C"	9450	14500	130	297	323	158	96	103	38	87	85	0	287	317	182	102	109	42	86	81	0	0	0	0	0	0	0	0	0	0	0	0	0	0	0	0	0	0	0	1.086	1.056	1.068	0.999	2.226	0.921	0.646	0.000	0.000	0.000	0.000	0.000	0.000	0.000	0.000	0.000	0.000	0.000	0.000	0.000	0.000	120	405	386	442	0.120	Error	Error	201	185	0	0	227	215	0	0	0	0
2	15	7	"ERG8"	"YMR220W"	9630	14500	130	15955	14443	8459	104	109	41	99	99	0	7255	6708	4291	102	108	40	95	95	0	0	0	0	0	0	0	0	0	0	0	0	0	0	0	0	0	0	0	2.216	2.171	2.182	2.432	2.164	2.139	0.902	0.000	0.000	0.000	0.000	0.000	0.000	0.000	0.000	0.000	0.000	0.000	0.000	0.000	0.000	120	455	23004	20945	1.148	Error	Error	15851	7153	0	0	14339	6606	0	0	0	0
2	16	7	""	"YMR162C"	9820	14490	130	314	332	149	106	110	43	93	89	0	237	251	107	102	108	41	90	76	0	0	0	0	0	0	0	0	0	0	0	0	0	0	0	0	0	0	0	1.541	1.517	1.674	1.510	2.162	1.660	0.469	0.000	0.000	0.000	0.000	0.000	0.000	0.000	0.000	0.000	0.000	0.000	0.000	0.000	0.000	120	470	343	375	0.624	Error	Error	208	135	0	0	226	149	0	0	0	0
2	17	7	""	"YMR192W"	10010	14490	140	3515	3789	2431	100	118	124	97	94	0	5780	6286	4228	102	113	76	95	94	0	0	0	0	0	0	0	0	0	0	0	0	0	0	0	0	0	0	0	0.601	0.597	0.605	0.670	2.336	0.575	0.917	0.000	0.000	0.000	0.000	0.000	0.000	0.000	0.000	0.000	0.000	0.000	0.000	0.000	0.000	156	537	9093	9873	-0.733	Error	Error	3415	5678	0	0	3689	6184	0	0	0	0
2	18	7	""	"YMR222C"	10180	14490	150	128	147	81	102	126	173	11	0	0	128	162	108	103	112	78	25	15	0	0	0	0	0	0	0	0	0	0	0	0	0	0	0	0	0	0	0	1.040	0.763	0.925	0.925	3.601	0.780	0.330	0.000	0.000	0.000	0.000	0.000	0.000	0.000	0.000	0.000	0.000	0.000	0.000	0.000	0.000	156	614	51	104	0.057	Error	Error	26	25	0	0	45	59	0	0	-50	0
2	19	7	"MSS11"	"YMR164C"	10410	14500	130	208	214	77	99	106	43	84	62	0	269	274	108	101	105	31	90	85	0	0	0	0	0	0	0	0	0	0	0	0	0	0	0	0	0	0	0	0.649	0.665	0.652	0.669	2.189	0.683	0.462	0.000	0.000	0.000	0.000	0.000	0.000	0.000	0.000	0.000	0.000	0.000	0.000	0.000	0.000	120	514	277	288	-0.624	Error	Error	109	168	0	0	115	173	0	0	0	0
2	20	7	"MRPL24"	"YMR193W"	10570	14490	130	1486	1443	606	102	111	61	99	95	0	3309	3021	1327	106	112	41	99	97	0	0	0	0	0	0	0	0	0	0	0	0	0	0	0	0	0	0	0	0.432	0.460	0.457	0.470	1.551	0.435	0.898	0.000	0.000	0.000	0.000	0.000	0.000	0.000	0.000	0.000	0.000	0.000	0.000	0.000	0.000	120	527	4587	4256	-1.211	Error	Error	1384	3203	0	0	1341	2915	0	0	0	0
2	21	7	"MRE11"	"YMR224C"	10790	14500	130	784	843	665	105	116	64	90	86	0	583	635	497	103	111	41	87	84	0	0	0	0	0	0	0	0	0	0	0	0	0	0	0	0	0	0	0	1.415	1.387	1.420	1.307	2.229	1.452	0.765	0.000	0.000	0.000	0.000	0.000	0.000	0.000	0.000	0.000	0.000	0.000	0.000	0.000	0.000	120	512	1159	1270	0.500	Error	Error	679	480	0	0	738	532	0	0	0	0
2	22	7	""	"YMR166C"	10960	14500	130	3152	2878	1841	100	105	41	97	97	0	8114	7627	5022	107	111	36	94	93	0	0	0	0	0	0	0	0	0	0	0	0	0	0	0	0	0	0	0	0.381	0.369	0.367	0.417	2.100	0.356	0.917	0.000	0.000	0.000	0.000	0.000	0.000	0.000	0.000	0.000	0.000	0.000	0.000	0.000	0.000	120	596	11059	10298	-1.392	Error	Error	3052	8007	0	0	2778	7520	0	0	0	0
2	1	8	"RPL36A"	"YMR194W"	6960	14680	130	1204	1187	614	98	109	78	95	90	0	3826	3616	1955	98	113	82	95	93	0	0	0	0	0	0	0	0	0	0	0	0	0	0	0	0	0	0	0	0.297	0.310	0.306	0.325	1.848	0.297	0.896	0.000	0.000	0.000	0.000	0.000	0.000	0.000	0.000	0.000	0.000	0.000	0.000	0.000	0.000	120	628	4834	4607	-1.753	Error	Error	1106	3728	0	0	1089	3518	0	0	0	0
2	2	8	""	"YMR226C"	7160	14680	130	3215	3026	2054	98	107	59	95	92	0	5298	5047	3560	100	118	113	89	88	0	0	0	0	0	0	0	0	0	0	0	0	0	0	0	0	0	0	0	0.600	0.592	0.589	0.699	2.265	0.562	0.891	0.000	0.000	0.000	0.000	0.000	0.000	0.000	0.000	0.000	0.000	0.000	0.000	0.000	0.000	120	573	8315	7875	-0.738	Error	Error	3117	5198	0	0	2928	4947	0	0	0	0
2	3	8	""	"YNL207W"	7370	14690	110	204	204	70	97	104	41	83	57	0	211	222	79	99	108	42	86	57	0	0	0	0	0	0	0	0	0	0	0	0	0	0	0	0	0	0	0	0.955	0.870	0.819	0.869	2.497	0.834	0.333	0.000	0.000	0.000	0.000	0.000	0.000	0.000	0.000	0.000	0.000	0.000	0.000	0.000	0.000	80	458	219	230	-0.066	Error	Error	107	112	0	0	107	123	0	0	0	0
2	4	8	"lap3"	"YNL239W"	7550	14680	140	1926	2024	889	95	109	130	98	98	0	5680	5640	2612	100	109	45	98	97	0	0	0	0	0	0	0	0	0	0	0	0	0	0	0	0	0	0	0	0.328	0.348	0.354	0.378	1.911	0.332	0.904	0.000	0.000	0.000	0.000	0.000	0.000	0.000	0.000	0.000	0.000	0.000	0.000	0.000	0.000	156	613	7411	7469	-1.608	Error	Error	1831	5580	0	0	1929	5540	0	0	0	0
2	5	8	"bni1"	"YNL271C"	7770	14690	120	244	252	95	94	100	45	86	75	0	340	331	128	103	113	47	89	85	0	0	0	0	0	0	0	0	0	0	0	0	0	0	0	0	0	0	0	0.633	0.693	0.700	0.695	1.941	0.680	0.560	0.000	0.000	0.000	0.000	0.000	0.000	0.000	0.000	0.000	0.000	0.000	0.000	0.000	0.000	120	425	387	386	-0.660	Error	Error	150	237	0	0	158	228	0	0	0	0
2	6	8	"SSB2"	"YNL209W"	7930	14680	130	3067	2996	1398	99	105	43	100	100	0	4757	4909	2393	102	113	45	100	99	0	0	0	0	0	0	0	0	0	0	0	0	0	0	0	0	0	0	0	0.638	0.603	0.611	0.621	1.564	0.568	0.888	0.000	0.000	0.000	0.000	0.000	0.000	0.000	0.000	0.000	0.000	0.000	0.000	0.000	0.000	120	425	7623	7704	-0.649	Error	Error	2968	4655	0	0	2897	4807	0	0	0	0
2	7	8	"zwf1"	"YNL241C"	8110	14680	140	11270	10486	6271	97	108	80	99	98	0	3805	3705	2294	98	107	40	93	91	0	0	0	0	0	0	0	0	0	0	0	0	0	0	0	0	0	0	0	3.014	2.880	2.914	3.135	1.847	2.914	0.924	0.000	0.000	0.000	0.000	0.000	0.000	0.000	0.000	0.000	0.000	0.000	0.000	0.000	0.000	156	554	14880	13996	1.592	Error	Error	11173	3707	0	0	10389	3607	0	0	0	0
2	8	8	"TOF1"	"YNL273W"	8280	14690	110	671	707	300	92	105	61	97	97	0	462	478	206	96	109	53	95	93	0	0	0	0	0	0	0	0	0	0	0	0	0	0	0	0	0	0	0	1.582	1.610	1.667	1.686	1.846	1.675	0.764	0.000	0.000	0.000	0.000	0.000	0.000	0.000	0.000	0.000	0.000	0.000	0.000	0.000	0.000	80	448	945	997	0.662	Error	Error	579	366	0	0	615	382	0	0	0	0
2	9	8	""	"YNL211C"	8500	14680	130	6753	5781	2136	99	111	58	100	100	0	2968	2575	1029	105	117	55	97	96	0	0	0	0	0	0	0	0	0	0	0	0	0	0	0	0	0	0	0	2.324	2.300	2.271	2.559	1.825	2.341	0.901	0.000	0.000	0.000	0.000	0.000	0.000	0.000	0.000	0.000	0.000	0.000	0.000	0.000	0.000	120	564	9517	8152	1.217	Error	Error	6654	2863	0	0	5682	2470	0	0	0	0
2	10	8	"SLA2"	"YNL243W"	8680	14690	130	2486	2686	1588	100	105	41	100	100	0	5176	5773	3880	107	115	42	99	98	0	0	0	0	0	0	0	0	0	0	0	0	0	0	0	0	0	0	0	0.471	0.456	0.461	0.511	2.018	0.425	0.917	0.000	0.000	0.000	0.000	0.000	0.000	0.000	0.000	0.000	0.000	0.000	0.000	0.000	0.000	120	493	7455	8252	-1.087	Error	Error	2386	5069	0	0	2586	5666	0	0	0	0
2	11	8	""	"YNL275W"	8870	14680	140	8147	8760	5442	100	105	41	100	98	0	6022	6270	3864	103	111	37	97	95	0	0	0	0	0	0	0	0	0	0	0	0	0	0	0	0	0	0	0	1.360	1.404	1.435	1.558	1.903	1.423	0.923	0.000	0.000	0.000	0.000	0.000	0.000	0.000	0.000	0.000	0.000	0.000	0.000	0.000	0.000	156	549	13966	14827	0.443	Error	Error	8047	5919	0	0	8660	6167	0	0	0	0
2	12	8	""	"YNL213C"	9050	14680	130	2599	2498	1216	98	102	39	99	99	0	4070	3854	2010	102	109	36	98	97	0	0	0	0	0	0	0	0	0	0	0	0	0	0	0	0	0	0	0	0.630	0.640	0.648	0.682	1.801	0.616	0.888	0.000	0.000	0.000	0.000	0.000	0.000	0.000	0.000	0.000	0.000	0.000	0.000	0.000	0.000	120	485	6469	6152	-0.666	Error	Error	2501	3968	0	0	2400	3752	0	0	0	0
2	13	8	""	"YNL245C"	9250	14680	140	2207	2063	893	99	105	44	99	98	0	3232	2993	1286	105	112	41	97	97	0	0	0	0	0	0	0	0	0	0	0	0	0	0	0	0	0	0	0	0.674	0.680	0.689	0.683	1.688	0.673	0.910	0.000	0.000	0.000	0.000	0.000	0.000	0.000	0.000	0.000	0.000	0.000	0.000	0.000	0.000	156	557	5235	4852	-0.569	Error	Error	2108	3127	0	0	1964	2888	0	0	0	0
2	14	8	"met2"	"YNL277W"	9450	14680	120	3972	4497	3418	103	110	47	99	98	0	4457	5319	4084	107	114	43	95	93	0	0	0	0	0	0	0	0	0	0	0	0	0	0	0	0	0	0	0	0.889	0.843	0.855	0.994	2.416	0.836	0.929	0.000	0.000	0.000	0.000	0.000	0.000	0.000	0.000	0.000	0.000	0.000	0.000	0.000	0.000	120	454	8219	9606	-0.169	Error	Error	3869	4350	0	0	4394	5212	0	0	0	0
2	15	8	"ALG6"	"YOR002W"	9640	14680	140	13656	12327	5937	108	113	50	100	100	0	6064	5433	2673	105	111	40	98	96	0	0	0	0	0	0	0	0	0	0	0	0	0	0	0	0	0	0	0	2.274	2.293	2.299	2.387	1.847	2.342	0.914	0.000	0.000	0.000	0.000	0.000	0.000	0.000	0.000	0.000	0.000	0.000	0.000	0.000	0.000	156	483	19507	17547	1.185	Error	Error	13548	5959	0	0	12219	5328	0	0	0	0
2	16	8	"DHS1"	"YOR033C"	9820	14680	140	15526	15166	7123	110	141	186	99	99	0	7166	7099	3565	108	152	402	95	91	0	0	0	0	0	0	0	0	0	0	0	0	0	0	0	0	0	0	0	2.184	2.154	2.172	2.314	1.652	2.164	0.921	0.000	0.000	0.000	0.000	0.000	0.000	0.000	0.000	0.000	0.000	0.000	0.000	0.000	0.000	156	530	22474	22047	1.127	Error	Error	15416	7058	0	0	15056	6991	0	0	0	0
2	17	8	"CYT1"	"YOR065W"	10030	14690	130	2450	2321	1125	109	140	192	95	90	0	5877	5646	2995	110	163	417	93	89	0	0	0	0	0	0	0	0	0	0	0	0	0	0	0	0	0	0	0	0.406	0.400	0.399	0.427	1.731	0.377	0.906	0.000	0.000	0.000	0.000	0.000	0.000	0.000	0.000	0.000	0.000	0.000	0.000	0.000	0.000	120	501	8108	7748	-1.301	Error	Error	2341	5767	0	0	2212	5536	0	0	0	0
2	18	8	""	"YOR004W"	10200	14690	130	11355	9815	3687	112	119	79	100	100	0	4321	3762	1490	109	117	40	99	99	0	0	0	0	0	0	0	0	0	0	0	0	0	0	0	0	0	0	0	2.669	2.656	2.631	2.783	1.589	2.681	0.903	0.000	0.000	0.000	0.000	0.000	0.000	0.000	0.000	0.000	0.000	0.000	0.000	0.000	0.000	120	466	15455	13356	1.416	Error	Error	11243	4212	0	0	9703	3653	0	0	0	0
2	19	8	"SHE4"	"YOR035C"	10390	14690	130	2693	2795	1849	108	121	92	97	95	0	5580	6205	4203	108	115	38	95	95	0	0	0	0	0	0	0	0	0	0	0	0	0	0	0	0	0	0	0	0.472	0.441	0.438	0.479	1.950	0.426	0.917	0.000	0.000	0.000	0.000	0.000	0.000	0.000	0.000	0.000	0.000	0.000	0.000	0.000	0.000	120	443	8057	8784	-1.082	Error	Error	2585	5472	0	0	2687	6097	0	0	0	0
2	20	8	"alg8"	"YOR067C"	10560	14680	140	10512	11637	6002	103	113	65	100	100	0	6363	6238	3210	108	117	43	99	98	0	0	0	0	0	0	0	0	0	0	0	0	0	0	0	0	0	0	0	1.664	1.882	1.871	1.993	1.665	1.920	0.919	0.000	0.000	0.000	0.000	0.000	0.000	0.000	0.000	0.000	0.000	0.000	0.000	0.000	0.000	156	443	16664	17664	0.735	Error	Error	10409	6255	0	0	11534	6130	0	0	0	0
2	21	8	""	"YOR006C"	10740	14680	140	20955	20051	11773	111	118	57	99	99	0	5072	4639	2847	108	116	41	94	92	0	0	0	0	0	0	0	0	0	0	0	0	0	0	0	0	0	0	0	4.199	4.401	4.339	4.824	1.834	4.427	0.920	0.000	0.000	0.000	0.000	0.000	0.000	0.000	0.000	0.000	0.000	0.000	0.000	0.000	0.000	156	528	25808	24471	2.070	Error	Error	20844	4964	0	0	19940	4531	0	0	0	0
2	22	8	"cyc2"	"YOR037W"	10940	14680	130	10373	9551	3483	108	111	43	100	100	0	8673	7948	3004	106	112	38	100	100	0	0	0	0	0	0	0	0	0	0	0	0	0	0	0	0	0	0	0	1.198	1.204	1.213	1.240	1.395	1.202	0.928	0.000	0.000	0.000	0.000	0.000	0.000	0.000	0.000	0.000	0.000	0.000	0.000	0.000	0.000	120	628	18832	17285	0.261	Error	Error	10265	8567	0	0	9443	7842	0	0	0	0
2	1	9	"VPS5"	"YOR069W"	6950	14870	140	15835	15212	6289	96	105	52	100	100	0	4427	4016	1784	99	113	84	98	98	0	0	0	0	0	0	0	0	0	0	0	0	0	0	0	0	0	0	0	3.637	3.859	3.957	4.136	1.562	3.893	0.939	0.000	0.000	0.000	0.000	0.000	0.000	0.000	0.000	0.000	0.000	0.000	0.000	0.000	0.000	156	676	20067	19033	1.863	Error	Error	15739	4328	0	0	15116	3917	0	0	0	0
2	2	9	"SLG1"	"YOR008C"	7140	14870	140	10352	9581	4244	96	104	57	100	100	0	8261	7468	3688	101	119	120	98	98	0	0	0	0	0	0	0	0	0	0	0	0	0	0	0	0	0	0	0	1.257	1.287	1.290	1.445	1.845	1.261	0.934	0.000	0.000	0.000	0.000	0.000	0.000	0.000	0.000	0.000	0.000	0.000	0.000	0.000	0.000	156	551	18416	16852	0.330	Error	Error	10256	8160	0	0	9485	7367	0	0	0	0
2	3	9	"CKB2"	"YOR039W"	7330	14870	130	2664	2500	731	96	118	200	100	100	0	6225	5609	1818	99	110	94	100	99	0	0	0	0	0	0	0	0	0	0	0	0	0	0	0	0	0	0	0	0.419	0.436	0.439	0.454	1.409	0.417	0.903	0.000	0.000	0.000	0.000	0.000	0.000	0.000	0.000	0.000	0.000	0.000	0.000	0.000	0.000	120	560	8694	7914	-1.254	Error	Error	2568	6126	0	0	2404	5510	0	0	0	0
2	4	9	""	"YOR071C"	7540	14880	130	4805	4853	2822	97	123	212	97	96	0	5195	5441	3302	101	111	55	98	97	0	0	0	0	0	0	0	0	0	0	0	0	0	0	0	0	0	0	0	0.924	0.891	0.888	0.967	1.714	0.867	0.918	0.000	0.000	0.000	0.000	0.000	0.000	0.000	0.000	0.000	0.000	0.000	0.000	0.000	0.000	120	503	9802	10096	-0.114	Error	Error	4708	5094	0	0	4756	5340	0	0	0	0
2	5	9	"ATF1"	"YOR377W"	7710	14870	130	15334	14555	5489	97	104	61	100	100	0	9524	8685	3311	104	113	51	100	100	0	0	0	0	0	0	0	0	0	0	0	0	0	0	0	0	0	0	0	1.618	1.685	1.702	1.693	1.400	1.690	0.940	0.000	0.000	0.000	0.000	0.000	0.000	0.000	0.000	0.000	0.000	0.000	0.000	0.000	0.000	120	463	24657	23039	0.694	Error	Error	15237	9420	0	0	14458	8581	0	0	0	0
2	6	9	"HST2"	"YPL015C"	7900	14870	140	6931	6604	2319	95	102	54	100	100	0	6614	6225	2371	104	112	41	99	99	0	0	0	0	0	0	0	0	0	0	0	0	0	0	0	0	0	0	0	1.050	1.063	1.068	1.146	1.693	1.060	0.925	0.000	0.000	0.000	0.000	0.000	0.000	0.000	0.000	0.000	0.000	0.000	0.000	0.000	0.000	156	480	13346	12630	0.070	Error	Error	6836	6510	0	0	6509	6121	0	0	0	0
2	7	9	""	"YPL047W"	8090	14880	130	1143	1035	416	94	101	46	99	95	0	3051	2591	1165	99	108	47	98	97	0	0	0	0	0	0	0	0	0	0	0	0	0	0	0	0	0	0	0	0.355	0.378	0.375	0.415	1.805	0.354	0.895	0.000	0.000	0.000	0.000	0.000	0.000	0.000	0.000	0.000	0.000	0.000	0.000	0.000	0.000	120	486	4001	3433	-1.493	Error	Error	1049	2952	0	0	941	2492	0	0	0	0
2	8	9	""	"YOR379C"	8280	14880	120	294	313	117	96	105	72	91	69	0	337	356	143	100	112	52	94	89	0	0	0	0	0	0	0	0	0	0	0	0	0	0	0	0	0	0	0	0.835	0.848	0.825	0.863	2.050	0.916	0.511	0.000	0.000	0.000	0.000	0.000	0.000	0.000	0.000	0.000	0.000	0.000	0.000	0.000	0.000	120	493	435	473	-0.259	Error	Error	198	237	0	0	217	256	0	0	0	0
2	9	9	""	"YPL017C"	8470	14880	130	3682	3440	1685	100	107	69	100	99	0	6814	6226	3095	104	126	324	95	94	0	0	0	0	0	0	0	0	0	0	0	0	0	0	0	0	0	0	0	0.534	0.546	0.555	0.606	1.851	0.536	0.928	0.000	0.000	0.000	0.000	0.000	0.000	0.000	0.000	0.000	0.000	0.000	0.000	0.000	0.000	120	488	10292	9462	-0.906	Error	Error	3582	6710	0	0	3340	6122	0	0	0	0
2	10	9	"DIG1"	"YPL049C"	8640	14870	140	2953	3237	1746	101	105	39	99	99	0	6725	7138	4189	105	125	320	96	94	0	0	0	0	0	0	0	0	0	0	0	0	0	0	0	0	0	0	0	0.431	0.446	0.446	0.486	1.794	0.419	0.915	0.000	0.000	0.000	0.000	0.000	0.000	0.000	0.000	0.000	0.000	0.000	0.000	0.000	0.000	156	497	9472	10169	-1.215	Error	Error	2852	6620	0	0	3136	7033	0	0	0	0
2	11	9	"FRE3"	"YOR381W"	8840	14880	120	261	279	124	96	100	38	90	83	0	341	374	223	99	106	34	90	86	0	0	0	0	0	0	0	0	0	0	0	0	0	0	0	0	0	0	0	0.682	0.665	0.661	0.707	2.346	0.540	0.504	0.000	0.000	0.000	0.000	0.000	0.000	0.000	0.000	0.000	0.000	0.000	0.000	0.000	0.000	120	471	407	458	-0.553	Error	Error	165	242	0	0	183	275	0	0	0	0
2	12	9	""	"YPL019C"	9030	14880	130	2726	3100	1784	94	99	38	100	100	0	5729	5979	3838	97	104	35	99	99	0	0	0	0	0	0	0	0	0	0	0	0	0	0	0	0	0	0	0	0.467	0.511	0.535	0.574	1.822	0.480	0.917	0.000	0.000	0.000	0.000	0.000	0.000	0.000	0.000	0.000	0.000	0.000	0.000	0.000	0.000	120	522	8264	8888	-1.097	Error	Error	2632	5632	0	0	3006	5882	0	0	0	0
2	13	9	"ARL3"	"YPL051W"	9210	14870	130	7942	7639	3253	96	102	38	100	100	0	4685	4461	1953	102	109	39	100	100	0	0	0	0	0	0	0	0	0	0	0	0	0	0	0	0	0	0	0	1.712	1.730	1.757	1.837	1.501	1.751	0.919	0.000	0.000	0.000	0.000	0.000	0.000	0.000	0.000	0.000	0.000	0.000	0.000	0.000	0.000	120	498	12429	11902	0.776	Error	Error	7846	4583	0	0	7543	4359	0	0	0	0
2	14	9	""	"YOR383C"	9400	14870	130	7632	7375	2432	102	114	56	100	100	0	5236	4948	1784	105	112	37	100	100	0	0	0	0	0	0	0	0	0	0	0	0	0	0	0	0	0	0	0	1.468	1.502	1.546	1.568	1.371	1.493	0.923	0.000	0.000	0.000	0.000	0.000	0.000	0.000	0.000	0.000	0.000	0.000	0.000	0.000	0.000	120	554	12661	12116	0.553	Error	Error	7530	5131	0	0	7273	4843	0	0	0	0
2	15	9	"ECM23"	"YPL021W"	9610	14880	130	6779	6033	2704	107	113	51	100	100	0	3121	2758	1319	107	111	34	97	95	0	0	0	0	0	0	0	0	0	0	0	0	0	0	0	0	0	0	0	2.214	2.235	2.287	2.456	1.765	2.241	0.904	0.000	0.000	0.000	0.000	0.000	0.000	0.000	0.000	0.000	0.000	0.000	0.000	0.000	0.000	120	552	9686	8577	1.146	Error	Error	6672	3014	0	0	5926	2651	0	0	0	0
2	16	9	"KTR6"	"YPL053C"	9800	14870	140	1833	1819	869	112	128	132	97	92	0	3103	2999	1616	109	147	384	91	86	0	0	0	0	0	0	0	0	0	0	0	0	0	0	0	0	0	0	0	0.575	0.591	0.600	0.682	2.370	0.553	0.861	0.000	0.000	0.000	0.000	0.000	0.000	0.000	0.000	0.000	0.000	0.000	0.000	0.000	0.000	156	552	4715	4597	-0.799	Error	Error	1721	2994	0	0	1707	2890	0	0	0	0
2	17	9	""	"YPR078C"	9990	14880	110	2510	2352	973	110	130	147	98	96	0	9777	8704	4118	109	161	428	95	92	0	0	0	0	0	0	0	0	0	0	0	0	0	0	0	0	0	0	0	0.248	0.261	0.264	0.303	2.011	0.246	0.906	0.000	0.000	0.000	0.000	0.000	0.000	0.000	0.000	0.000	0.000	0.000	0.000	0.000	0.000	80	451	12068	10837	-2.010	Error	Error	2400	9668	0	0	2242	8595	0	0	0	0
2	18	9	"RPC40"	"YPR110C"	10190	14870	140	4992	4852	3008	103	110	55	98	96	0	4809	4528	3141	108	121	71	89	87	0	0	0	0	0	0	0	0	0	0	0	0	0	0	0	0	0	0	0	1.040	1.074	1.113	1.310	2.325	1.029	0.908	0.000	0.000	0.000	0.000	0.000	0.000	0.000	0.000	0.000	0.000	0.000	0.000	0.000	0.000	156	578	9590	9169	0.057	Error	Error	4889	4701	0	0	4749	4420	0	0	0	0
2	19	9	""	"YPR139C"	10390	14870	140	2591	2324	1111	99	115	89	98	95	0	4317	3914	2014	104	113	39	96	95	0	0	0	0	0	0	0	0	0	0	0	0	0	0	0	0	0	0	0	0.592	0.584	0.601	0.660	2.022	0.559	0.910	0.000	0.000	0.000	0.000	0.000	0.000	0.000	0.000	0.000	0.000	0.000	0.000	0.000	0.000	156	507	6705	6035	-0.758	Error	Error	2492	4213	0	0	2225	3810	0	0	0	0
2	20	9	"tef1"	"YPR080W"	10570	14870	130	3477	3260	1084	98	108	65	100	100	0	10066	9432	3261	103	110	36	100	100	0	0	0	0	0	0	0	0	0	0	0	0	0	0	0	0	0	0	0	0.339	0.339	0.342	0.349	1.410	0.332	0.936	0.000	0.000	0.000	0.000	0.000	0.000	0.000	0.000	0.000	0.000	0.000	0.000	0.000	0.000	120	459	13342	12491	-1.560	Error	Error	3379	9963	0	0	3162	9329	0	0	0	0
2	21	9	""	"YPR112C"	10770	14870	130	5985	7580	6305	101	106	46	99	99	0	5438	6328	5259	104	114	58	95	92	0	0	0	0	0	0	0	0	0	0	0	0	0	0	0	0	0	0	0	1.103	1.202	1.148	1.448	2.530	1.214	0.913	0.000	0.000	0.000	0.000	0.000	0.000	0.000	0.000	0.000	0.000	0.000	0.000	0.000	0.000	120	570	11218	13703	0.142	Error	Error	5884	5334	0	0	7479	6224	0	0	0	0
2	22	9	"kar3"	"YPR141C"	10940	14880	110	267	269	99	98	100	37	90	81	0	343	344	123	100	107	36	93	92	0	0	0	0	0	0	0	0	0	0	0	0	0	0	0	0	0	0	0	0.695	0.701	0.750	0.632	2.513	0.700	0.556	0.000	0.000	0.000	0.000	0.000	0.000	0.000	0.000	0.000	0.000	0.000	0.000	0.000	0.000	80	495	412	415	-0.524	Error	Error	169	243	0	0	171	244	0	0	0	0
2	1	10	"DIB1"	"YPR082C"	6960	15060	120	2636	2367	949	92	99	41	99	98	0	4346	3833	1757	98	109	61	96	96	0	0	0	0	0	0	0	0	0	0	0	0	0	0	0	0	0	0	0	0.599	0.609	0.602	0.657	1.713	0.564	0.908	0.000	0.000	0.000	0.000	0.000	0.000	0.000	0.000	0.000	0.000	0.000	0.000	0.000	0.000	120	564	6792	6010	-0.740	Error	Error	2544	4248	0	0	2275	3735	0	0	0	0
2	2	10	""	"YPR114W"	7160	15060	120	2418	2118	777	90	98	56	99	98	0	8202	7231	2889	98	116	123	100	97	0	0	0	0	0	0	0	0	0	0	0	0	0	0	0	0	0	0	0	0.287	0.284	0.289	0.298	1.645	0.271	0.906	0.000	0.000	0.000	0.000	0.000	0.000	0.000	0.000	0.000	0.000	0.000	0.000	0.000	0.000	120	512	10432	9161	-1.800	Error	Error	2328	8104	0	0	2028	7133	0	0	0	0
2	3	10	""	"YPR143W"	7350	15060	130	2502	2433	1225	93	98	38	100	99	0	3397	3014	1681	99	104	35	94	92	0	0	0	0	0	0	0	0	0	0	0	0	0	0	0	0	0	0	0	0.730	0.803	0.811	0.914	2.241	0.776	0.888	0.000	0.000	0.000	0.000	0.000	0.000	0.000	0.000	0.000	0.000	0.000	0.000	0.000	0.000	120	518	5707	5255	-0.453	Error	Error	2409	3298	0	0	2340	2915	0	0	0	0
2	4	10	""	"YPR084W"	7530	15060	140	14692	12871	6024	97	117	192	98	97	0	11337	9676	4869	102	110	53	97	94	0	0	0	0	0	0	0	0	0	0	0	0	0	0	0	0	0	0	0	1.299	1.334	1.324	1.437	2.002	1.322	0.917	0.000	0.000	0.000	0.000	0.000	0.000	0.000	0.000	0.000	0.000	0.000	0.000	0.000	0.000	156	553	25830	22348	0.377	Error	Error	14595	11235	0	0	12774	9574	0	0	0	0
2	5	10	""	"YPR116W"	7730	15060	130	1543	1501	699	98	103	50	100	95	0	4702	4360	2221	102	109	47	97	95	0	0	0	0	0	0	0	0	0	0	0	0	0	0	0	0	0	0	0	0.314	0.329	0.335	0.376	2.112	0.316	0.921	0.000	0.000	0.000	0.000	0.000	0.000	0.000	0.000	0.000	0.000	0.000	0.000	0.000	0.000	120	503	6045	5661	-1.671	Error	Error	1445	4600	0	0	1403	4258	0	0	0	0
2	6	10	"ASN1"	"YPR145W"	7910	15060	140	8386	7903	5191	97	103	49	100	99	0	6832	6513	4296	103	112	67	94	92	0	0	0	0	0	0	0	0	0	0	0	0	0	0	0	0	0	0	0	1.232	1.218	1.255	1.477	2.556	1.225	0.892	0.000	0.000	0.000	0.000	0.000	0.000	0.000	0.000	0.000	0.000	0.000	0.000	0.000	0.000	156	533	15018	14216	0.301	Error	Error	8289	6729	0	0	7806	6410	0	0	0	0
2	7	10	""	"iYAL056W"	8110	15060	130	2302	2176	1076	96	107	57	98	92	0	1642	1549	795	101	112	54	90	89	0	0	0	0	0	0	0	0	0	0	0	0	0	0	0	0	0	0	0	1.432	1.436	1.402	1.466	1.687	1.417	0.906	0.000	0.000	0.000	0.000	0.000	0.000	0.000	0.000	0.000	0.000	0.000	0.000	0.000	0.000	120	498	3747	3528	0.518	Error	Error	2206	1541	0	0	2080	1448	0	0	0	0
2	8	10	""	"iYAL051W"	8290	15060	130	2187	2067	836	96	108	63	99	98	0	563	523	216	100	114	55	91	88	0	0	0	0	0	0	0	0	0	0	0	0	0	0	0	0	0	0	0	4.516	4.660	4.769	4.817	1.593	4.765	0.841	0.000	0.000	0.000	0.000	0.000	0.000	0.000	0.000	0.000	0.000	0.000	0.000	0.000	0.000	120	517	2554	2394	2.175	Error	Error	2091	463	0	0	1971	423	0	0	0	0
2	9	10	""	"iYAL046C"	8490	15060	120	625	569	239	96	100	39	92	90	0	839	782	329	99	125	333	82	64	0	0	0	0	0	0	0	0	0	0	0	0	0	0	0	0	0	0	0	0.715	0.693	0.703	0.661	1.817	0.381	0.419	0.000	0.000	0.000	0.000	0.000	0.000	0.000	0.000	0.000	0.000	0.000	0.000	0.000	0.000	120	462	1269	1156	-0.484	Error	Error	529	740	0	0	473	683	0	0	0	0
2	10	10	""	"iYAL031C"	8670	15060	120	3024	2688	921	98	103	41	100	100	0	2651	2399	961	101	109	41	99	98	0	0	0	0	0	0	0	0	0	0	0	0	0	0	0	0	0	0	0	1.147	1.127	1.119	1.198	1.707	1.094	0.920	0.000	0.000	0.000	0.000	0.000	0.000	0.000	0.000	0.000	0.000	0.000	0.000	0.000	0.000	120	459	5476	4888	0.198	Error	Error	2926	2550	0	0	2590	2298	0	0	0	0
2	11	10	""	"iYAL027W"	8860	15060	130	4631	4228	1908	94	98	39	100	100	0	1399	1244	580	97	103	31	95	93	0	0	0	0	0	0	0	0	0	0	0	0	0	0	0	0	0	0	0	3.485	3.604	3.652	3.781	1.610	3.628	0.915	0.000	0.000	0.000	0.000	0.000	0.000	0.000	0.000	0.000	0.000	0.000	0.000	0.000	0.000	120	545	5839	5281	1.801	Error	Error	4537	1302	0	0	4134	1147	0	0	0	0
2	12	10	""	"iYAL023C"	9060	15070	120	1150	1069	431	92	96	37	100	99	0	2951	2592	1120	95	100	30	98	95	0	0	0	0	0	0	0	0	0	0	0	0	0	0	0	0	0	0	0	0.370	0.391	0.392	0.430	2.092	0.368	0.891	0.000	0.000	0.000	0.000	0.000	0.000	0.000	0.000	0.000	0.000	0.000	0.000	0.000	0.000	120	493	3914	3474	-1.433	Error	Error	1058	2856	0	0	977	2497	0	0	0	0
2	13	10	""	"iYAL007C"	9250	15060	130	4638	5117	2551	96	101	35	100	100	0	2703	2817	1446	98	102	32	99	99	0	0	0	0	0	0	0	0	0	0	0	0	0	0	0	0	0	0	0	1.744	1.847	1.845	1.967	1.657	1.861	0.916	0.000	0.000	0.000	0.000	0.000	0.000	0.000	0.000	0.000	0.000	0.000	0.000	0.000	0.000	120	517	7147	7740	0.802	Error	Error	4542	2605	0	0	5021	2719	0	0	0	0
2	14	10	""	"iYAL003W"	9430	15070	130	4866	4706	2962	96	101	37	99	98	0	3959	3898	2740	101	104	31	94	90	0	0	0	0	0	0	0	0	0	0	0	0	0	0	0	0	0	0	0	1.236	1.214	1.205	1.453	2.317	1.156	0.920	0.000	0.000	0.000	0.000	0.000	0.000	0.000	0.000	0.000	0.000	0.000	0.000	0.000	0.000	120	553	8628	8407	0.306	Error	Error	4770	3858	0	0	4610	3797	0	0	0	0
2	15	10	""	"iYAR002W"	9630	15070	130	3155	2837	1396	98	102	39	99	99	0	1422	1274	689	101	106	44	90	88	0	0	0	0	0	0	0	0	0	0	0	0	0	0	0	0	0	0	0	2.314	2.335	2.223	2.407	1.836	2.304	0.899	0.000	0.000	0.000	0.000	0.000	0.000	0.000	0.000	0.000	0.000	0.000	0.000	0.000	0.000	120	534	4378	3912	1.210	Error	Error	3057	1321	0	0	2739	1173	0	0	0	0
2	16	10	""	"itL(CAA)A"	9810	15060	130	12202	12876	7221	103	110	44	100	100	0	9493	9407	5079	105	113	50	98	97	0	0	0	0	0	0	0	0	0	0	0	0	0	0	0	0	0	0	0	1.289	1.373	1.355	1.524	1.898	1.400	0.896	0.000	0.000	0.000	0.000	0.000	0.000	0.000	0.000	0.000	0.000	0.000	0.000	0.000	0.000	120	526	21487	22075	0.366	Error	Error	12099	9388	0	0	12773	9302	0	0	0	0
2	17	10	""	"iYAR028W"	10010	15070	130	3482	3552	1970	102	108	41	100	100	0	4362	4102	2525	105	112	40	96	94	0	0	0	0	0	0	0	0	0	0	0	0	0	0	0	0	0	0	0	0.794	0.863	0.867	0.999	2.132	0.824	0.894	0.000	0.000	0.000	0.000	0.000	0.000	0.000	0.000	0.000	0.000	0.000	0.000	0.000	0.000	120	558	7637	7447	-0.333	Error	Error	3380	4257	0	0	3450	3997	0	0	0	0
2	18	10	""	"iYAR035W"	10190	15070	130	1353	1351	794	94	99	36	95	93	0	1401	1333	851	100	106	33	87	87	0	0	0	0	0	0	0	0	0	0	0	0	0	0	0	0	0	0	0	0.968	1.019	0.987	1.071	2.125	0.968	0.899	0.000	0.000	0.000	0.000	0.000	0.000	0.000	0.000	0.000	0.000	0.000	0.000	0.000	0.000	120	570	2560	2490	-0.047	Error	Error	1259	1301	0	0	1257	1233	0	0	0	0
2	19	10	""	"iYBR162C"	10420	15060	130	1694	1496	558	92	96	38	100	99	0	3653	3415	1223	97	101	26	99	99	0	0	0	0	0	0	0	0	0	0	0	0	0	0	0	0	0	0	0	0.451	0.423	0.427	0.420	1.360	0.419	0.906	0.000	0.000	0.000	0.000	0.000	0.000	0.000	0.000	0.000	0.000	0.000	0.000	0.000	0.000	120	547	5158	4722	-1.150	Error	Error	1602	3556	0	0	1404	3318	0	0	0	0
2	20	10	""	"iYBR165W"	10590	15060	120	1776	1609	544	92	96	34	100	100	0	618	589	217	96	100	26	94	93	0	0	0	0	0	0	0	0	0	0	0	0	0	0	0	0	0	0	0	3.226	3.077	3.068	3.156	1.640	3.080	0.856	0.000	0.000	0.000	0.000	0.000	0.000	0.000	0.000	0.000	0.000	0.000	0.000	0.000	0.000	120	462	2206	2010	1.690	Error	Error	1684	522	0	0	1517	493	0	0	0	0
2	21	10	""	"iYBR169C"	10760	15070	110	2293	2056	923	96	102	48	97	95	0	3280	2838	1287	99	116	118	93	92	0	0	0	0	0	0	0	0	0	0	0	0	0	0	0	0	0	0	0	0.691	0.716	0.714	0.784	1.968	0.688	0.899	0.000	0.000	0.000	0.000	0.000	0.000	0.000	0.000	0.000	0.000	0.000	0.000	0.000	0.000	80	460	5378	4699	-0.534	Error	Error	2197	3181	0	0	1960	2739	0	0	0	0
2	22	10	""	"iYBR187W"	10970	15070	130	963	986	624	93	98	44	91	87	0	3176	2570	1731	100	113	97	86	82	0	0	0	0	0	0	0	0	0	0	0	0	0	0	0	0	0	0	0	0.283	0.362	0.370	0.399	2.339	0.342	0.862	0.000	0.000	0.000	0.000	0.000	0.000	0.000	0.000	0.000	0.000	0.000	0.000	0.000	0.000	120	710	3946	3363	-1.822	Error	Error	870	3076	0	0	893	2470	0	0	0	0
2	1	11	""	"iYBR192W"	6980	15260	130	9338	8279	3063	93	104	65	100	100	0	2877	2554	1036	98	109	56	98	96	0	0	0	0	0	0	0	0	0	0	0	0	0	0	0	0	0	0	0	3.327	3.333	3.413	3.591	1.627	3.356	0.919	0.000	0.000	0.000	0.000	0.000	0.000	0.000	0.000	0.000	0.000	0.000	0.000	0.000	0.000	120	676	12024	10642	1.734	Error	Error	9245	2779	0	0	8186	2456	0	0	0	0
2	2	11	""	"iYBR196C"	7190	15260	130	1751	1707	748	89	99	66	100	99	0	5660	5403	2440	94	110	114	99	99	0	0	0	0	0	0	0	0	0	0	0	0	0	0	0	0	0	0	0	0.299	0.305	0.306	0.315	1.554	0.291	0.895	0.000	0.000	0.000	0.000	0.000	0.000	0.000	0.000	0.000	0.000	0.000	0.000	0.000	0.000	120	552	7228	6927	-1.744	Error	Error	1662	5566	0	0	1618	5309	0	0	0	0
2	3	11	""	"iYBRCdelta19"	7360	15260	130	2706	2544	1168	90	95	36	100	100	0	2499	2231	1141	95	100	32	96	95	0	0	0	0	0	0	0	0	0	0	0	0	0	0	0	0	0	0	0	1.088	1.149	1.186	1.282	1.879	1.107	0.872	0.000	0.000	0.000	0.000	0.000	0.000	0.000	0.000	0.000	0.000	0.000	0.000	0.000	0.000	120	515	5020	4590	0.122	Error	Error	2616	2404	0	0	2454	2136	0	0	0	0
2	4	11	""	"iYBR212W"	7550	15250	130	2025	1900	858	91	97	47	100	100	0	4044	3718	1785	96	107	69	99	98	0	0	0	0	0	0	0	0	0	0	0	0	0	0	0	0	0	0	0	0.490	0.499	0.505	0.551	1.853	0.488	0.917	0.000	0.000	0.000	0.000	0.000	0.000	0.000	0.000	0.000	0.000	0.000	0.000	0.000	0.000	120	547	5882	5431	-1.030	Error	Error	1934	3948	0	0	1809	3622	0	0	0	0
2	5	11	""	"iYBR216C"	7740	15260	120	2612	2296	1175	91	98	55	99	98	0	2340	2127	1220	96	108	88	90	90	0	0	0	0	0	0	0	0	0	0	0	0	0	0	0	0	0	0	0	1.123	1.086	1.082	1.279	2.372	1.031	0.899	0.000	0.000	0.000	0.000	0.000	0.000	0.000	0.000	0.000	0.000	0.000	0.000	0.000	0.000	120	512	4765	4236	0.168	Error	Error	2521	2244	0	0	2205	2031	0	0	0	0
2	6	11	""	"iYBR237W"	7930	15250	130	6750	6755	3265	93	102	67	100	100	0	1423	1369	615	99	107	66	98	97	0	0	0	0	0	0	0	0	0	0	0	0	0	0	0	0	0	0	0	5.028	5.246	5.135	5.462	1.616	5.608	0.896	0.000	0.000	0.000	0.000	0.000	0.000	0.000	0.000	0.000	0.000	0.000	0.000	0.000	0.000	120	542	7981	7932	2.330	Error	Error	6657	1324	0	0	6662	1270	0	0	0	0
2	7	11	""	"iYBR241C"	8120	15250	130	1880	1689	593	93	105	60	100	100	0	2581	2355	850	99	110	48	100	99	0	0	0	0	0	0	0	0	0	0	0	0	0	0	0	0	0	0	0	0.720	0.707	0.717	0.728	1.467	0.699	0.903	0.000	0.000	0.000	0.000	0.000	0.000	0.000	0.000	0.000	0.000	0.000	0.000	0.000	0.000	120	541	4269	3852	-0.474	Error	Error	1787	2482	0	0	1596	2256	0	0	0	0
2	8	11	""	"iYBR246W"	8310	15250	130	3472	3271	1477	89	100	57	100	100	0	2315	2114	961	98	108	43	98	98	0	0	0	0	0	0	0	0	0	0	0	0	0	0	0	0	0	0	0	1.526	1.578	1.563	1.585	1.548	1.590	0.926	0.000	0.000	0.000	0.000	0.000	0.000	0.000	0.000	0.000	0.000	0.000	0.000	0.000	0.000	120	596	5600	5198	0.610	Error	Error	3383	2217	0	0	3182	2016	0	0	0	0
2	9	11	""	"iYDL140C"	8500	15250	130	482	466	200	87	93	37	95	91	0	1223	1193	592	96	103	35	93	90	0	0	0	0	0	0	0	0	0	0	0	0	0	0	0	0	0	0	0	0.350	0.345	0.341	0.365	1.896	0.316	0.834	0.000	0.000	0.000	0.000	0.000	0.000	0.000	0.000	0.000	0.000	0.000	0.000	0.000	0.000	120	533	1522	1476	-1.513	Error	Error	395	1127	0	0	379	1097	0	0	0	0
2	10	11	""	"iYDL136W"	8690	15250	130	4584	4069	1601	93	98	39	100	99	0	1961	1736	769	97	104	39	97	93	0	0	0	0	0	0	0	0	0	0	0	0	0	0	0	0	0	0	0	2.409	2.426	2.418	2.646	1.807	2.414	0.907	0.000	0.000	0.000	0.000	0.000	0.000	0.000	0.000	0.000	0.000	0.000	0.000	0.000	0.000	120	535	6355	5615	1.269	Error	Error	4491	1864	0	0	3976	1639	0	0	0	0
2	11	11	""	"iYDL133W"	8890	15260	120	471	497	279	91	95	35	94	86	0	1305	1273	788	96	101	29	94	91	0	0	0	0	0	0	0	0	0	0	0	0	0	0	0	0	0	0	0	0.314	0.345	0.352	0.362	2.223	0.330	0.857	0.000	0.000	0.000	0.000	0.000	0.000	0.000	0.000	0.000	0.000	0.000	0.000	0.000	0.000	120	497	1589	1583	-1.670	Error	Error	380	1209	0	0	406	1177	0	0	0	0
2	12	11	""	"iYDL117W"	9070	15250	130	1035	957	381	93	95	35	97	97	0	2341	2141	864	95	99	27	95	95	0	0	0	0	0	0	0	0	0	0	0	0	0	0	0	0	0	0	0	0.419	0.422	0.429	0.442	1.498	0.414	0.905	0.000	0.000	0.000	0.000	0.000	0.000	0.000	0.000	0.000	0.000	0.000	0.000	0.000	0.000	120	511	3188	2910	-1.254	Error	Error	942	2246	0	0	864	2046	0	0	0	0
2	13	11	""	"iYDL113C"	9260	15250	130	1002	948	391	90	96	50	97	96	0	2372	2163	957	97	100	27	97	96	0	0	0	0	0	0	0	0	0	0	0	0	0	0	0	0	0	0	0	0.401	0.415	0.416	0.448	2.029	0.395	0.877	0.000	0.000	0.000	0.000	0.000	0.000	0.000	0.000	0.000	0.000	0.000	0.000	0.000	0.000	120	569	3187	2924	-1.319	Error	Error	912	2275	0	0	858	2066	0	0	0	0
2	14	11	""	"iYDL109C"	9460	15260	130	743	869	535	89	123	255	82	65	0	2082	2133	1396	96	110	92	90	90	0	0	0	0	0	0	0	0	0	0	0	0	0	0	0	0	0	0	0	0.329	0.383	0.402	0.427	2.153	0.365	0.905	0.000	0.000	0.000	0.000	0.000	0.000	0.000	0.000	0.000	0.000	0.000	0.000	0.000	0.000	120	588	2640	2817	-1.603	Error	Error	654	1986	0	0	780	2037	0	0	0	0
2	15	11	""	"iYDL090C"	9650	15260	130	2023	1937	765	90	94	37	100	99	0	3468	3167	1398	94	101	45	98	95	0	0	0	0	0	0	0	0	0	0	0	0	0	0	0	0	0	0	0	0.573	0.601	0.618	0.684	1.960	0.577	0.908	0.000	0.000	0.000	0.000	0.000	0.000	0.000	0.000	0.000	0.000	0.000	0.000	0.000	0.000	120	516	5307	4920	-0.804	Error	Error	1933	3374	0	0	1847	3073	0	0	0	0
2	16	11	""	"iYDL086W"	9840	15250	130	1790	1771	770	95	100	39	100	100	0	2981	2865	1291	99	105	47	100	99	0	0	0	0	0	0	0	0	0	0	0	0	0	0	0	0	0	0	0	0.588	0.606	0.602	0.620	1.458	0.585	0.919	0.000	0.000	0.000	0.000	0.000	0.000	0.000	0.000	0.000	0.000	0.000	0.000	0.000	0.000	120	539	4577	4442	-0.766	Error	Error	1695	2882	0	0	1676	2766	0	0	0	0
2	17	11	""	"iYDL082W"	10040	15260	130	2026	2192	1665	94	98	36	98	96	0	840	876	603	100	104	30	86	85	0	0	0	0	0	0	0	0	0	0	0	0	0	0	0	0	0	0	0	2.611	2.704	2.614	2.703	1.976	2.866	0.890	0.000	0.000	0.000	0.000	0.000	0.000	0.000	0.000	0.000	0.000	0.000	0.000	0.000	0.000	120	482	2672	2874	1.384	Error	Error	1932	740	0	0	2098	776	0	0	0	0
2	18	11	""	"iYDL065C"	10210	15260	130	1724	1465	737	92	97	36	95	92	0	1490	1251	658	97	102	32	89	87	0	0	0	0	0	0	0	0	0	0	0	0	0	0	0	0	0	0	0	1.172	1.190	1.165	1.205	1.983	1.185	0.866	0.000	0.000	0.000	0.000	0.000	0.000	0.000	0.000	0.000	0.000	0.000	0.000	0.000	0.000	120	491	3025	2527	0.228	Error	Error	1632	1393	0	0	1373	1154	0	0	0	0
2	19	11	""	"iYDL060W"	10400	15260	130	393	380	162	88	93	36	91	89	0	496	476	207	96	100	31	87	86	0	0	0	0	0	0	0	0	0	0	0	0	0	0	0	0	0	0	0	0.762	0.768	0.758	0.735	1.790	0.738	0.747	0.000	0.000	0.000	0.000	0.000	0.000	0.000	0.000	0.000	0.000	0.000	0.000	0.000	0.000	120	559	705	672	-0.391	Error	Error	305	400	0	0	292	380	0	0	0	0
2	20	11	""	"iYDL056W"	10590	15250	130	6445	5961	2149	89	95	35	100	100	0	1803	1646	612	96	100	29	99	98	0	0	0	0	0	0	0	0	0	0	0	0	0	0	0	0	0	0	0	3.723	3.788	3.781	3.924	1.446	3.825	0.928	0.000	0.000	0.000	0.000	0.000	0.000	0.000	0.000	0.000	0.000	0.000	0.000	0.000	0.000	120	609	8063	7422	1.897	Error	Error	6356	1707	0	0	5872	1550	0	0	0	0
2	21	11	""	"iYDRWdelta12"	10800	15250	130	1949	1682	698	93	98	39	100	100	0	2482	2189	893	99	106	87	96	94	0	0	0	0	0	0	0	0	0	0	0	0	0	0	0	0	0	0	0	0.779	0.760	0.784	0.787	1.643	0.750	0.898	0.000	0.000	0.000	0.000	0.000	0.000	0.000	0.000	0.000	0.000	0.000	0.000	0.000	0.000	120	523	4239	3679	-0.361	Error	Error	1856	2383	0	0	1589	2090	0	0	0	0
2	22	11	""	"iYDR244W"	10980	15260	130	479	467	207	87	90	33	94	91	0	1231	1144	528	95	98	26	95	95	0	0	0	0	0	0	0	0	0	0	0	0	0	0	0	0	0	0	0	0.345	0.362	0.364	0.346	1.685	0.340	0.795	0.000	0.000	0.000	0.000	0.000	0.000	0.000	0.000	0.000	0.000	0.000	0.000	0.000	0.000	120	586	1528	1429	-1.535	Error	Error	392	1136	0	0	380	1049	0	0	0	0
2	1	12	""	"iYDR248C"	6970	15450	140	6573	5959	1919	93	103	66	100	99	0	2667	2397	901	99	109	61	97	97	0	0	0	0	0	0	0	0	0	0	0	0	0	0	0	0	0	0	0	2.523	2.553	2.579	2.808	1.757	2.538	0.929	0.000	0.000	0.000	0.000	0.000	0.000	0.000	0.000	0.000	0.000	0.000	0.000	0.000	0.000	156	680	9048	8164	1.335	Error	Error	6480	2568	0	0	5866	2298	0	0	0	0
2	2	12	""	"itG(GCC)D2"	7170	15450	130	1293	1166	364	91	100	68	99	99	0	1580	1405	516	97	107	65	97	95	0	0	0	0	0	0	0	0	0	0	0	0	0	0	0	0	0	0	0	0.811	0.822	0.816	0.900	1.651	0.778	0.875	0.000	0.000	0.000	0.000	0.000	0.000	0.000	0.000	0.000	0.000	0.000	0.000	0.000	0.000	120	488	2685	2383	-0.303	Error	Error	1202	1483	0	0	1075	1308	0	0	0	0
2	3	12	""	"iYDR265W"	7360	15450	130	1463	1328	484	90	95	36	100	99	0	1706	1508	611	94	101	35	97	96	0	0	0	0	0	0	0	0	0	0	0	0	0	0	0	0	0	0	0	0.852	0.876	0.877	0.925	1.513	0.853	0.879	0.000	0.000	0.000	0.000	0.000	0.000	0.000	0.000	0.000	0.000	0.000	0.000	0.000	0.000	120	446	2985	2652	-0.232	Error	Error	1373	1612	0	0	1238	1414	0	0	0	0
2	4	12	""	"iYDR271C"	7530	15450	130	777	753	211	89	95	48	100	99	0	1155	1084	301	94	104	67	99	96	0	0	0	0	0	0	0	0	0	0	0	0	0	0	0	0	0	0	0	0.648	0.671	0.654	0.683	1.415	0.663	0.869	0.000	0.000	0.000	0.000	0.000	0.000	0.000	0.000	0.000	0.000	0.000	0.000	0.000	0.000	120	476	1749	1654	-0.625	Error	Error	688	1061	0	0	664	990	0	0	0	0
2	5	12	""	"iYDR286C"	7730	15450	130	2811	2715	448	87	105	129	100	100	0	6247	6050	1253	92	105	70	99	99	0	0	0	0	0	0	0	0	0	0	0	0	0	0	0	0	0	0	0	0.443	0.441	0.439	0.458	1.503	0.420	0.912	0.000	0.000	0.000	0.000	0.000	0.000	0.000	0.000	0.000	0.000	0.000	0.000	0.000	0.000	120	539	8879	8586	-1.176	Error	Error	2724	6155	0	0	2628	5958	0	0	0	0
2	6	12	""	"iYDR292C"	7920	15450	130	3319	2889	1240	88	110	144	97	94	0	3796	3294	1531	92	100	35	96	96	0	0	0	0	0	0	0	0	0	0	0	0	0	0	0	0	0	0	0	0.872	0.875	0.881	0.943	1.637	0.863	0.913	0.000	0.000	0.000	0.000	0.000	0.000	0.000	0.000	0.000	0.000	0.000	0.000	0.000	0.000	120	529	6935	6003	-0.197	Error	Error	3231	3704	0	0	2801	3202	0	0	0	0
2	7	12	""	"iYDR296W"	8110	15440	130	1345	1357	573	91	94	35	97	97	0	4149	3872	1756	96	103	36	100	100	0	0	0	0	0	0	0	0	0	0	0	0	0	0	0	0	0	0	0	0.309	0.335	0.335	0.354	1.664	0.307	0.889	0.000	0.000	0.000	0.000	0.000	0.000	0.000	0.000	0.000	0.000	0.000	0.000	0.000	0.000	120	559	5307	5042	-1.692	Error	Error	1254	4053	0	0	1266	3776	0	0	0	0
2	8	12	""	"iYDR311W"	8300	15460	90	133	151	81	90	93	36	53	34	0	155	178	86	97	105	39	57	44	0	0	0	0	0	0	0	0	0	0	0	0	0	0	0	0	0	0	0	0.741	0.753	0.852	1.060	3.097	0.879	0.373	0.000	0.000	0.000	0.000	0.000	0.000	0.000	0.000	0.000	0.000	0.000	0.000	0.000	0.000	52	337	101	142	-0.432	Error	Error	43	58	0	0	61	81	0	0	0	0
2	9	12	""	"iYDR315C"	8470	15440	130	658	596	287	85	89	34	95	90	0	1476	1255	658	97	101	31	95	91	0	0	0	0	0	0	0	0	0	0	0	0	0	0	0	0	0	0	0	0.416	0.441	0.471	0.460	1.616	0.413	0.857	0.000	0.000	0.000	0.000	0.000	0.000	0.000	0.000	0.000	0.000	0.000	0.000	0.000	0.000	120	543	1952	1669	-1.267	Error	Error	573	1379	0	0	511	1158	0	0	0	0
2	10	12	""	"iYDR317W"	8680	15440	150	96	106	44	87	92	36	31	12	0	111	124	56	96	102	31	32	23	0	0	0	0	0	0	0	0	0	0	0	0	0	0	0	0	0	0	0	0.600	0.679	1.014	1.119	4.520	0.777	0.061	0.000	0.000	0.000	0.000	0.000	0.000	0.000	0.000	0.000	0.000	0.000	0.000	0.000	0.000	156	602	24	47	-0.737	Error	Error	9	15	0	0	19	28	0	0	-50	0
2	11	12	""	"itK(CUU)E1"	8860	15450	130	1289	1183	434	90	94	35	100	99	0	681	631	247	97	104	32	95	91	0	0	0	0	0	0	0	0	0	0	0	0	0	0	0	0	0	0	0	2.053	2.047	2.040	2.220	1.666	2.037	0.873	0.000	0.000	0.000	0.000	0.000	0.000	0.000	0.000	0.000	0.000	0.000	0.000	0.000	0.000	120	473	1783	1627	1.038	Error	Error	1199	584	0	0	1093	534	0	0	0	0
2	12	12	""	"iYELWdelta6"	9040	15440	130	3213	2832	1207	94	97	39	100	100	0	1145	1018	476	99	105	38	94	93	0	0	0	0	0	0	0	0	0	0	0	0	0	0	0	0	0	0	0	2.982	2.979	2.961	3.164	1.618	2.921	0.888	0.000	0.000	0.000	0.000	0.000	0.000	0.000	0.000	0.000	0.000	0.000	0.000	0.000	0.000	120	510	4165	3657	1.576	Error	Error	3119	1046	0	0	2738	919	0	0	0	0
2	13	12	""	"iYEL007W"	9230	15450	130	5046	5212	2451	92	117	226	99	98	0	1882	1793	864	99	107	53	96	95	0	0	0	0	0	0	0	0	0	0	0	0	0	0	0	0	0	0	0	2.778	3.022	3.032	3.216	1.611	3.001	0.890	0.000	0.000	0.000	0.000	0.000	0.000	0.000	0.000	0.000	0.000	0.000	0.000	0.000	0.000	120	571	6737	6814	1.474	Error	Error	4954	1783	0	0	5120	1694	0	0	0	0
2	14	12	""	"isnR14"	9420	15460	110	4768	4214	1957	95	139	290	96	93	0	1342	1215	610	98	116	104	90	86	0	0	0	0	0	0	0	0	0	0	0	0	0	0	0	0	0	0	0	3.756	3.688	3.736	3.811	1.877	3.704	0.875	0.000	0.000	0.000	0.000	0.000	0.000	0.000	0.000	0.000	0.000	0.000	0.000	0.000	0.000	80	462	5917	5236	1.909	Error	Error	4673	1244	0	0	4119	1117	0	0	0	0
2	15	12	""	"iYER010C-1"	9620	15450	120	1541	1551	924	88	105	150	94	89	0	3533	3312	2077	94	108	92	96	93	0	0	0	0	0	0	0	0	0	0	0	0	0	0	0	0	0	0	0	0.423	0.455	0.487	0.487	1.981	0.434	0.894	0.000	0.000	0.000	0.000	0.000	0.000	0.000	0.000	0.000	0.000	0.000	0.000	0.000	0.000	120	478	4892	4681	-1.243	Error	Error	1453	3439	0	0	1463	3218	0	0	0	0
2	16	12	""	"iYER012W"	9800	15440	120	918	884	473	88	92	36	96	95	0	2060	1972	1089	94	100	27	100	100	0	0	0	0	0	0	0	0	0	0	0	0	0	0	0	0	0	0	0	0.422	0.424	0.443	0.426	1.835	0.409	0.873	0.000	0.000	0.000	0.000	0.000	0.000	0.000	0.000	0.000	0.000	0.000	0.000	0.000	0.000	120	458	2796	2674	-1.244	Error	Error	830	1966	0	0	796	1878	0	0	0	0
2	17	12	""	"iYER027C"	9990	15440	130	1734	1746	856	88	93	36	100	99	0	3287	3143	1610	98	102	31	98	98	0	0	0	0	0	0	0	0	0	0	0	0	0	0	0	0	0	0	0	0.516	0.544	0.540	0.566	1.679	0.527	0.907	0.000	0.000	0.000	0.000	0.000	0.000	0.000	0.000	0.000	0.000	0.000	0.000	0.000	0.000	120	512	4835	4703	-0.954	Error	Error	1646	3189	0	0	1658	3045	0	0	0	0
2	18	12	""	"iYER031C"	10180	15450	130	1751	1581	596	87	94	37	100	98	0	3499	3114	1285	97	102	31	100	100	0	0	0	0	0	0	0	0	0	0	0	0	0	0	0	0	0	0	0	0.489	0.495	0.499	0.519	1.589	0.457	0.873	0.000	0.000	0.000	0.000	0.000	0.000	0.000	0.000	0.000	0.000	0.000	0.000	0.000	0.000	120	440	5066	4511	-1.032	Error	Error	1664	3402	0	0	1494	3017	0	0	0	0
2	19	12	""	"iYER035W"	10360	15440	130	2374	2331	738	87	93	41	100	100	0	1313	1278	419	95	101	42	100	99	0	0	0	0	0	0	0	0	0	0	0	0	0	0	0	0	0	0	0	1.878	1.897	1.886	1.952	1.307	1.834	0.911	0.000	0.000	0.000	0.000	0.000	0.000	0.000	0.000	0.000	0.000	0.000	0.000	0.000	0.000	120	532	3505	3427	0.909	Error	Error	2287	1218	0	0	2244	1183	0	0	0	0
2	20	12	""	"iYERWdelta9"	10570	15450	80	140	148	60	86	90	32	63	38	0	132	154	66	93	96	26	61	44	0	0	0	0	0	0	0	0	0	0	0	0	0	0	0	0	0	0	0	1.385	1.016	0.884	1.046	3.043	0.770	0.174	0.000	0.000	0.000	0.000	0.000	0.000	0.000	0.000	0.000	0.000	0.000	0.000	0.000	0.000	52	328	93	123	0.469	Error	Error	54	39	0	0	62	61	0	0	0	0
2	21	12	""	"iYER050C"	10770	15440	150	103	114	70	86	94	44	28	12	0	102	126	160	96	104	56	16	5	0	0	0	0	0	0	0	0	0	0	0	0	0	0	0	0	0	0	0	2.833	0.933	1.450	1.490	4.532	0.378	0.281	0.000	0.000	0.000	0.000	0.000	0.000	0.000	0.000	0.000	0.000	0.000	0.000	0.000	0.000	156	669	23	58	1.503	Error	Error	17	6	0	0	28	30	0	0	-50	0
2	22	12	""	"iYER053C-1"	10960	15440	150	103	110	53	85	89	34	34	16	0	103	112	46	94	98	33	23	14	0	0	0	0	0	0	0	0	0	0	0	0	0	0	0	0	0	0	0	2.000	1.389	1.063	1.141	3.512	2.135	0.066	0.000	0.000	0.000	0.000	0.000	0.000	0.000	0.000	0.000	0.000	0.000	0.000	0.000	0.000	156	709	27	43	1.000	Error	Error	18	9	0	0	25	18	0	0	-50	0
2	1	13	""	"iYFR048W"	6980	15630	140	8630	7584	2737	91	98	41	99	99	0	2866	2480	1042	99	107	55	95	94	0	0	0	0	0	0	0	0	0	0	0	0	0	0	0	0	0	0	0	3.086	3.147	3.132	3.417	1.932	3.171	0.882	0.000	0.000	0.000	0.000	0.000	0.000	0.000	0.000	0.000	0.000	0.000	0.000	0.000	0.000	156	630	11306	9874	1.626	Error	Error	8539	2767	0	0	7493	2381	0	0	0	0
2	2	13	""	"iYFR052W"	7160	15630	140	881	826	354	94	99	40	97	94	0	977	846	418	97	108	60	91	84	0	0	0	0	0	0	0	0	0	0	0	0	0	0	0	0	0	0	0	0.894	0.977	0.949	1.053	2.176	0.933	0.853	0.000	0.000	0.000	0.000	0.000	0.000	0.000	0.000	0.000	0.000	0.000	0.000	0.000	0.000	156	502	1667	1481	-0.161	Error	Error	787	880	0	0	732	749	0	0	0	0
2	3	13	""	"iYFR054C-0"	7360	15630	140	2941	2887	1481	91	94	35	99	99	0	3275	3111	1574	95	101	34	96	95	0	0	0	0	0	0	0	0	0	0	0	0	0	0	0	0	0	0	0	0.896	0.927	0.954	1.033	1.957	0.930	0.914	0.000	0.000	0.000	0.000	0.000	0.000	0.000	0.000	0.000	0.000	0.000	0.000	0.000	0.000	156	471	6030	5812	-0.158	Error	Error	2850	3180	0	0	2796	3016	0	0	0	0
2	4	13	""	"iYGL257C"	7540	15630	140	1716	1646	558	89	90	34	100	100	0	5245	4909	1814	94	101	46	100	99	0	0	0	0	0	0	0	0	0	0	0	0	0	0	0	0	0	0	0	0.316	0.323	0.325	0.349	1.797	0.313	0.906	0.000	0.000	0.000	0.000	0.000	0.000	0.000	0.000	0.000	0.000	0.000	0.000	0.000	0.000	156	488	6778	6372	-1.663	Error	Error	1627	5151	0	0	1557	4815	0	0	0	0
2	5	13	""	"iYGL256W-3"	7740	15630	130	2187	2110	717	86	101	102	100	99	0	5745	5603	1920	92	99	35	100	100	0	0	0	0	0	0	0	0	0	0	0	0	0	0	0	0	0	0	0	0.372	0.367	0.369	0.376	1.559	0.351	0.905	0.000	0.000	0.000	0.000	0.000	0.000	0.000	0.000	0.000	0.000	0.000	0.000	0.000	0.000	120	552	7754	7535	-1.428	Error	Error	2101	5653	0	0	2024	5511	0	0	0	0
2	6	13	""	"iYGL252C"	7940	15630	130	3865	3359	1651	85	100	101	100	98	0	6068	5251	2468	92	97	29	100	100	0	0	0	0	0	0	0	0	0	0	0	0	0	0	0	0	0	0	0	0.633	0.635	0.659	0.665	1.771	0.630	0.909	0.000	0.000	0.000	0.000	0.000	0.000	0.000	0.000	0.000	0.000	0.000	0.000	0.000	0.000	120	502	9756	8433	-0.661	Error	Error	3780	5976	0	0	3274	5159	0	0	0	0
2	7	13	""	"iYGL233W"	8110	15630	140	592	544	297	88	91	33	86	80	0	583	501	290	92	99	35	80	78	0	0	0	0	0	0	0	0	0	0	0	0	0	0	0	0	0	0	0	1.026	1.115	1.054	1.022	2.108	1.084	0.785	0.000	0.000	0.000	0.000	0.000	0.000	0.000	0.000	0.000	0.000	0.000	0.000	0.000	0.000	156	529	995	865	0.038	Error	Error	504	491	0	0	456	409	0	0	0	0
2	8	13	""	"iYGL228W"	8300	15630	130	2427	2227	911	89	91	34	100	100	0	3679	3435	1525	94	98	33	100	100	0	0	0	0	0	0	0	0	0	0	0	0	0	0	0	0	0	0	0	0.652	0.640	0.650	0.681	1.633	0.600	0.884	0.000	0.000	0.000	0.000	0.000	0.000	0.000	0.000	0.000	0.000	0.000	0.000	0.000	0.000	120	543	5923	5479	-0.617	Error	Error	2338	3585	0	0	2138	3341	0	0	0	0
2	9	13	""	"itV(AAC)G3-0"	8500	15630	140	2334	2221	762	86	89	34	100	99	0	4840	4659	1690	94	99	29	100	99	0	0	0	0	0	0	0	0	0	0	0	0	0	0	0	0	0	0	0	0.474	0.468	0.470	0.485	1.580	0.452	0.917	0.000	0.000	0.000	0.000	0.000	0.000	0.000	0.000	0.000	0.000	0.000	0.000	0.000	0.000	156	572	6994	6700	-1.078	Error	Error	2248	4746	0	0	2135	4565	0	0	0	0
2	10	13	""	"iYGL208W"	8690	15640	130	2012	1693	882	87	89	34	97	97	0	4436	3773	2293	98	102	29	95	94	0	0	0	0	0	0	0	0	0	0	0	0	0	0	0	0	0	0	0	0.444	0.437	0.453	0.554	2.394	0.394	0.866	0.000	0.000	0.000	0.000	0.000	0.000	0.000	0.000	0.000	0.000	0.000	0.000	0.000	0.000	120	494	6263	5281	-1.172	Error	Error	1925	4338	0	0	1606	3675	0	0	0	0
2	11	13	""	"itH(GUG)G1"	8880	15630	130	1560	1429	466	87	91	35	100	100	0	1026	966	357	96	102	32	97	96	0	0	0	0	0	0	0	0	0	0	0	0	0	0	0	0	0	0	0	1.584	1.543	1.563	1.598	1.462	1.528	0.873	0.000	0.000	0.000	0.000	0.000	0.000	0.000	0.000	0.000	0.000	0.000	0.000	0.000	0.000	120	521	2403	2212	0.663	Error	Error	1473	930	0	0	1342	870	0	0	0	0
2	12	13	""	"itK(UUU)G1"	9060	15640	130	2067	1870	669	87	92	37	100	100	0	4269	3894	1609	96	102	38	98	98	0	0	0	0	0	0	0	0	0	0	0	0	0	0	0	0	0	0	0	0.474	0.469	0.479	0.494	1.655	0.448	0.918	0.000	0.000	0.000	0.000	0.000	0.000	0.000	0.000	0.000	0.000	0.000	0.000	0.000	0.000	120	554	6153	5581	-1.076	Error	Error	1980	4173	0	0	1783	3798	0	0	0	0
2	13	13	""	"iYGR091W"	9280	15630	130	722	693	255	88	92	33	100	98	0	1703	1588	625	96	100	34	99	98	0	0	0	0	0	0	0	0	0	0	0	0	0	0	0	0	0	0	0	0.395	0.405	0.411	0.420	1.585	0.382	0.859	0.000	0.000	0.000	0.000	0.000	0.000	0.000	0.000	0.000	0.000	0.000	0.000	0.000	0.000	120	574	2241	2097	-1.342	Error	Error	634	1607	0	0	605	1492	0	0	0	0
2	14	13	""	"iYGR095C"	9480	15630	130	1122	967	484	92	95	37	95	92	0	1297	1123	587	95	102	38	90	86	0	0	0	0	0	0	0	0	0	0	0	0	0	0	0	0	0	0	0	0.857	0.851	0.873	0.983	2.216	0.846	0.897	0.000	0.000	0.000	0.000	0.000	0.000	0.000	0.000	0.000	0.000	0.000	0.000	0.000	0.000	120	537	2232	1903	-0.223	Error	Error	1030	1202	0	0	875	1028	0	0	0	0
2	15	13	""	"iYGR099W"	9660	15630	130	887	917	434	88	99	70	98	95	0	2789	2608	1245	96	107	67	98	98	0	0	0	0	0	0	0	0	0	0	0	0	0	0	0	0	0	0	0	0.297	0.330	0.341	0.343	1.545	0.319	0.886	0.000	0.000	0.000	0.000	0.000	0.000	0.000	0.000	0.000	0.000	0.000	0.000	0.000	0.000	120	513	3492	3341	-1.753	Error	Error	799	2693	0	0	829	2512	0	0	0	0
2	16	13	""	"iYGR111W"	9840	15630	130	1149	1071	386	84	89	33	100	100	0	3303	2947	1090	95	100	30	100	100	0	0	0	0	0	0	0	0	0	0	0	0	0	0	0	0	0	0	0	0.332	0.346	0.351	0.348	1.394	0.332	0.883	0.000	0.000	0.000	0.000	0.000	0.000	0.000	0.000	0.000	0.000	0.000	0.000	0.000	0.000	120	513	4273	3839	-1.591	Error	Error	1065	3208	0	0	987	2852	0	0	0	0
2	17	13	""	"iYGR117C"	10040	15630	130	1303	1356	701	86	89	33	100	100	0	2427	2344	1164	95	100	31	100	98	0	0	0	0	0	0	0	0	0	0	0	0	0	0	0	0	0	0	0	0.522	0.565	0.550	0.584	1.606	0.554	0.900	0.000	0.000	0.000	0.000	0.000	0.000	0.000	0.000	0.000	0.000	0.000	0.000	0.000	0.000	120	500	3549	3519	-0.938	Error	Error	1217	2332	0	0	1270	2249	0	0	0	0
2	18	13	""	"itN(GUU)G"	10220	15630	140	623	588	293	87	92	42	89	87	0	1198	1031	577	95	100	30	88	86	0	0	0	0	0	0	0	0	0	0	0	0	0	0	0	0	0	0	0	0.486	0.535	0.538	0.567	1.702	0.499	0.841	0.000	0.000	0.000	0.000	0.000	0.000	0.000	0.000	0.000	0.000	0.000	0.000	0.000	0.000	156	491	1639	1437	-1.041	Error	Error	536	1103	0	0	501	936	0	0	0	0
2	19	13	""	"iYGR133W"	10420	15630	130	737	735	280	84	89	38	98	97	0	2466	2442	1035	92	97	41	99	98	0	0	0	0	0	0	0	0	0	0	0	0	0	0	0	0	0	0	0	0.275	0.277	0.272	0.283	1.478	0.254	0.852	0.000	0.000	0.000	0.000	0.000	0.000	0.000	0.000	0.000	0.000	0.000	0.000	0.000	0.000	120	515	3027	3001	-1.862	Error	Error	653	2374	0	0	651	2350	0	0	0	0
2	20	13	""	"iYGR138C"	10580	15630	110	415	398	154	87	102	78	90	81	0	571	523	186	93	115	104	92	83	0	0	0	0	0	0	0	0	0	0	0	0	0	0	0	0	0	0	0	0.686	0.723	0.732	0.706	1.816	0.735	0.750	0.000	0.000	0.000	0.000	0.000	0.000	0.000	0.000	0.000	0.000	0.000	0.000	0.000	0.000	80	472	806	741	-0.543	Error	Error	328	478	0	0	311	430	0	0	0	0
2	21	13	""	"iYGR142W"	10790	15640	130	2324	2341	1230	85	99	73	100	98	0	1750	1791	1022	96	116	96	92	90	0	0	0	0	0	0	0	0	0	0	0	0	0	0	0	0	0	0	0	1.354	1.331	1.338	1.525	1.783	1.282	0.899	0.000	0.000	0.000	0.000	0.000	0.000	0.000	0.000	0.000	0.000	0.000	0.000	0.000	0.000	120	571	3893	3951	0.437	Error	Error	2239	1654	0	0	2256	1695	0	0	0	0
2	22	13	""	"iYGR154C"	10980	15630	130	1052	1047	514	86	91	35	99	99	0	3176	3187	1829	95	105	100	98	95	0	0	0	0	0	0	0	0	0	0	0	0	0	0	0	0	0	0	0	0.314	0.311	0.316	0.343	1.564	0.278	0.871	0.000	0.000	0.000	0.000	0.000	0.000	0.000	0.000	0.000	0.000	0.000	0.000	0.000	0.000	120	645	4047	4053	-1.673	Error	Error	966	3081	0	0	961	3092	0	0	0	0
2	1	14	""	"iYGR158C"	6980	15820	130	2515	2307	721	96	105	62	100	100	0	1583	1459	498	99	113	81	99	95	0	0	0	0	0	0	0	0	0	0	0	0	0	0	0	0	0	0	0	1.630	1.626	1.675	1.705	1.388	1.597	0.918	0.000	0.000	0.000	0.000	0.000	0.000	0.000	0.000	0.000	0.000	0.000	0.000	0.000	0.000	120	629	3903	3571	0.705	Error	Error	2419	1484	0	0	2211	1360	0	0	0	0
2	2	14	""	"iYGRCdelta30"	7180	15830	130	1616	1491	569	94	105	67	100	97	0	1849	1632	648	100	121	118	96	94	0	0	0	0	0	0	0	0	0	0	0	0	0	0	0	0	0	0	0	0.870	0.912	0.931	0.936	1.468	0.891	0.898	0.000	0.000	0.000	0.000	0.000	0.000	0.000	0.000	0.000	0.000	0.000	0.000	0.000	0.000	120	560	3271	2929	-0.201	Error	Error	1522	1749	0	0	1397	1532	0	0	0	0
2	3	14	""	"iYHR094C"	7380	15820	130	1010	979	349	88	94	41	99	98	0	2207	2027	761	95	107	74	99	96	0	0	0	0	0	0	0	0	0	0	0	0	0	0	0	0	0	0	0	0.437	0.461	0.454	0.470	1.386	0.437	0.894	0.000	0.000	0.000	0.000	0.000	0.000	0.000	0.000	0.000	0.000	0.000	0.000	0.000	0.000	120	515	3034	2823	-1.196	Error	Error	922	2112	0	0	891	1932	0	0	0	0
2	4	14	""	"iYHR098C"	7560	15820	130	1246	1238	539	86	90	35	100	99	0	4463	4222	2183	94	109	106	98	95	0	0	0	0	0	0	0	0	0	0	0	0	0	0	0	0	0	0	0	0.266	0.279	0.290	0.312	1.673	0.255	0.890	0.000	0.000	0.000	0.000	0.000	0.000	0.000	0.000	0.000	0.000	0.000	0.000	0.000	0.000	120	527	5529	5280	-1.913	Error	Error	1160	4369	0	0	1152	4128	0	0	0	0
2	5	14	""	"iYHR102W"	7750	15830	130	1531	1601	818	86	89	34	100	100	0	3000	3049	1734	93	102	82	97	95	0	0	0	0	0	0	0	0	0	0	0	0	0	0	0	0	0	0	0	0.497	0.513	0.516	0.554	1.544	0.481	0.914	0.000	0.000	0.000	0.000	0.000	0.000	0.000	0.000	0.000	0.000	0.000	0.000	0.000	0.000	120	564	4352	4471	-1.008	Error	Error	1445	2907	0	0	1515	2956	0	0	0	0
2	6	14	""	"iYHR119W"	7950	15830	130	1942	1733	647	86	90	35	99	98	0	2836	2502	1085	92	96	28	98	96	0	0	0	0	0	0	0	0	0	0	0	0	0	0	0	0	0	0	0	0.676	0.683	0.713	0.771	1.781	0.648	0.896	0.000	0.000	0.000	0.000	0.000	0.000	0.000	0.000	0.000	0.000	0.000	0.000	0.000	0.000	120	535	4600	4057	-0.564	Error	Error	1856	2744	0	0	1647	2410	0	0	0	0
2	7	14	""	"iYHR123W"	8130	15820	130	4254	4563	2683	86	92	52	100	100	0	908	940	570	92	97	36	95	92	0	0	0	0	0	0	0	0	0	0	0	0	0	0	0	0	0	0	0	5.108	5.279	5.132	5.706	1.751	5.269	0.889	0.000	0.000	0.000	0.000	0.000	0.000	0.000	0.000	0.000	0.000	0.000	0.000	0.000	0.000	120	509	4984	5325	2.353	Error	Error	4168	816	0	0	4477	848	0	0	0	0
2	8	14	""	"iYHR127W"	8330	15830	130	3179	3410	1634	88	95	53	100	100	0	834	846	403	93	97	39	97	93	0	0	0	0	0	0	0	0	0	0	0	0	0	0	0	0	0	0	0	4.171	4.412	4.287	4.633	1.556	4.441	0.899	0.000	0.000	0.000	0.000	0.000	0.000	0.000	0.000	0.000	0.000	0.000	0.000	0.000	0.000	120	520	3832	4075	2.061	Error	Error	3091	741	0	0	3322	753	0	0	0	0
2	9	14	""	"iYHR143W"	8510	15820	130	1326	1335	598	86	91	36	100	100	0	1878	1825	879	94	99	32	100	98	0	0	0	0	0	0	0	0	0	0	0	0	0	0	0	0	0	0	0	0.695	0.722	0.759	0.760	1.522	0.690	0.892	0.000	0.000	0.000	0.000	0.000	0.000	0.000	0.000	0.000	0.000	0.000	0.000	0.000	0.000	120	499	3024	2980	-0.525	Error	Error	1240	1784	0	0	1249	1731	0	0	0	0
2	10	14	""	"iYHRCdelta11"	8700	15820	130	650	645	263	88	91	36	99	95	0	1498	1382	612	95	99	28	98	97	0	0	0	0	0	0	0	0	0	0	0	0	0	0	0	0	0	0	0	0.401	0.433	0.438	0.489	2.066	0.412	0.849	0.000	0.000	0.000	0.000	0.000	0.000	0.000	0.000	0.000	0.000	0.000	0.000	0.000	0.000	120	538	1965	1844	-1.320	Error	Error	562	1403	0	0	557	1287	0	0	0	0
2	11	14	""	"iYHR149C"	8910	15830	130	479	499	258	91	93	37	98	92	0	915	995	598	94	99	31	95	94	0	0	0	0	0	0	0	0	0	0	0	0	0	0	0	0	0	0	0	0.473	0.453	0.437	0.461	1.794	0.421	0.834	0.000	0.000	0.000	0.000	0.000	0.000	0.000	0.000	0.000	0.000	0.000	0.000	0.000	0.000	120	492	1209	1309	-1.081	Error	Error	388	821	0	0	408	901	0	0	0	0
2	12	14	""	"iYHR164C"	9090	15820	130	1675	1518	585	87	92	35	98	98	0	2909	2586	1053	91	100	56	98	96	0	0	0	0	0	0	0	0	0	0	0	0	0	0	0	0	0	0	0	0.564	0.574	0.579	0.607	1.498	0.548	0.904	0.000	0.000	0.000	0.000	0.000	0.000	0.000	0.000	0.000	0.000	0.000	0.000	0.000	0.000	120	455	4406	3926	-0.827	Error	Error	1588	2818	0	0	1431	2495	0	0	0	0
2	13	14	""	"iYHR168W"	9270	15820	130	613	582	221	85	89	33	97	96	0	1854	1641	677	90	99	54	94	93	0	0	0	0	0	0	0	0	0	0	0	0	0	0	0	0	0	0	0	0.299	0.320	0.322	0.346	1.826	0.302	0.845	0.000	0.000	0.000	0.000	0.000	0.000	0.000	0.000	0.000	0.000	0.000	0.000	0.000	0.000	120	512	2292	2048	-1.740	Error	Error	528	1764	0	0	497	1551	0	0	0	0
2	14	14	""	"iYHR173C"	9470	15830	130	334	344	154	86	95	66	85	77	0	805	705	332	92	105	79	85	81	0	0	0	0	0	0	0	0	0	0	0	0	0	0	0	0	0	0	0	0.348	0.421	0.401	0.418	2.086	0.400	0.767	0.000	0.000	0.000	0.000	0.000	0.000	0.000	0.000	0.000	0.000	0.000	0.000	0.000	0.000	120	563	961	871	-1.524	Error	Error	248	713	0	0	258	613	0	0	0	0
2	15	14	""	"itT(AGU)J"	9660	15830	110	1529	1366	563	89	101	74	96	95	0	1973	1778	695	99	112	83	97	96	0	0	0	0	0	0	0	0	0	0	0	0	0	0	0	0	0	0	0	0.768	0.761	0.759	0.745	1.616	0.742	0.908	0.000	0.000	0.000	0.000	0.000	0.000	0.000	0.000	0.000	0.000	0.000	0.000	0.000	0.000	80	445	3314	2956	-0.380	Error	Error	1440	1874	0	0	1277	1679	0	0	0	0
2	16	14	""	"iYJL197W"	9850	15820	140	1725	1528	703	86	96	67	100	98	0	1833	1592	864	96	108	77	91	87	0	0	0	0	0	0	0	0	0	0	0	0	0	0	0	0	0	0	0	0.944	0.964	0.940	1.128	2.090	0.903	0.891	0.000	0.000	0.000	0.000	0.000	0.000	0.000	0.000	0.000	0.000	0.000	0.000	0.000	0.000	156	601	3376	2938	-0.084	Error	Error	1639	1737	0	0	1442	1496	0	0	0	0
2	17	14	""	"iYJL192C"	10050	15830	130	964	872	370	85	88	32	96	95	0	2535	2139	1047	93	98	29	94	94	0	0	0	0	0	0	0	0	0	0	0	0	0	0	0	0	0	0	0	0.360	0.385	0.398	0.438	1.878	0.357	0.880	0.000	0.000	0.000	0.000	0.000	0.000	0.000	0.000	0.000	0.000	0.000	0.000	0.000	0.000	120	413	3321	2833	-1.474	Error	Error	879	2442	0	0	787	2046	0	0	0	0
2	18	14	""	"iYJL173C"	10220	15820	140	4060	3917	1772	91	93	43	100	99	0	4535	4250	2270	96	101	31	98	96	0	0	0	0	0	0	0	0	0	0	0	0	0	0	0	0	0	0	0	0.894	0.921	0.911	1.048	2.003	0.866	0.924	0.000	0.000	0.000	0.000	0.000	0.000	0.000	0.000	0.000	0.000	0.000	0.000	0.000	0.000	156	443	8408	7980	-0.161	Error	Error	3969	4439	0	0	3826	4154	0	0	0	0
2	19	14	""	"iYJL168C"	10420	15820	140	1655	1549	701	89	94	38	97	96	0	3875	3514	1722	96	102	41	98	97	0	0	0	0	0	0	0	0	0	0	0	0	0	0	0	0	0	0	0	0.414	0.427	0.418	0.442	1.713	0.405	0.918	0.000	0.000	0.000	0.000	0.000	0.000	0.000	0.000	0.000	0.000	0.000	0.000	0.000	0.000	156	511	5345	4878	-1.271	Error	Error	1566	3779	0	0	1460	3418	0	0	0	0
2	20	14	""	"iYJL164C"	10610	15830	130	1430	1476	967	89	98	64	95	90	0	2740	2777	1875	96	111	81	92	90	0	0	0	0	0	0	0	0	0	0	0	0	0	0	0	0	0	0	0	0.507	0.517	0.499	0.556	1.901	0.493	0.911	0.000	0.000	0.000	0.000	0.000	0.000	0.000	0.000	0.000	0.000	0.000	0.000	0.000	0.000	120	495	3985	4068	-0.979	Error	Error	1341	2644	0	0	1387	2681	0	0	0	0
2	21	14	""	"isnR128"	10790	15820	130	309	301	104	86	90	36	93	89	0	566	528	202	96	100	35	91	90	0	0	0	0	0	0	0	0	0	0	0	0	0	0	0	0	0	0	0	0.474	0.498	0.471	0.498	1.962	0.465	0.751	0.000	0.000	0.000	0.000	0.000	0.000	0.000	0.000	0.000	0.000	0.000	0.000	0.000	0.000	120	513	693	647	-1.076	Error	Error	223	470	0	0	215	432	0	0	0	0
2	22	14	""	"iYJL146W"	10980	15830	130	1191	1242	672	85	105	142	91	87	0	2769	2745	1567	95	118	161	91	88	0	0	0	0	0	0	0	0	0	0	0	0	0	0	0	0	0	0	0	0.414	0.437	0.455	0.464	1.676	0.418	0.894	0.000	0.000	0.000	0.000	0.000	0.000	0.000	0.000	0.000	0.000	0.000	0.000	0.000	0.000	120	696	3780	3807	-1.274	Error	Error	1106	2674	0	0	1157	2650	0	0	0	0
2	1	15	""	"iYJL141C"	6980	16010	130	1474	1480	770	95	103	52	100	99	0	2262	2241	1175	103	114	72	95	93	0	0	0	0	0	0	0	0	0	0	0	0	0	0	0	0	0	0	0	0.639	0.648	0.641	0.688	1.666	0.625	0.889	0.000	0.000	0.000	0.000	0.000	0.000	0.000	0.000	0.000	0.000	0.000	0.000	0.000	0.000	120	608	3538	3523	-0.647	Error	Error	1379	2159	0	0	1385	2138	0	0	0	0
2	2	15	""	"iYJL125C"	7160	16010	130	808	743	306	93	105	71	94	89	0	2311	2121	970	101	128	156	92	90	0	0	0	0	0	0	0	0	0	0	0	0	0	0	0	0	0	0	0	0.324	0.322	0.318	0.323	1.449	0.302	0.870	0.000	0.000	0.000	0.000	0.000	0.000	0.000	0.000	0.000	0.000	0.000	0.000	0.000	0.000	120	505	2925	2670	-1.628	Error	Error	715	2210	0	0	650	2020	0	0	0	0
2	3	15	""	"iYJL120W"	7360	16020	130	769	722	275	89	97	60	100	95	0	2073	1911	759	96	120	147	98	96	0	0	0	0	0	0	0	0	0	0	0	0	0	0	0	0	0	0	0	0.344	0.349	0.356	0.345	1.436	0.326	0.873	0.000	0.000	0.000	0.000	0.000	0.000	0.000	0.000	0.000	0.000	0.000	0.000	0.000	0.000	120	516	2657	2448	-1.540	Error	Error	680	1977	0	0	633	1815	0	0	0	0
2	4	15	""	"iYJL115W"	7540	16020	130	1789	1619	592	83	91	53	99	99	0	1412	1300	510	92	103	93	97	94	0	0	0	0	0	0	0	0	0	0	0	0	0	0	0	0	0	0	0	1.292	1.272	1.305	1.304	1.407	1.280	0.877	0.000	0.000	0.000	0.000	0.000	0.000	0.000	0.000	0.000	0.000	0.000	0.000	0.000	0.000	120	514	3026	2744	0.370	Error	Error	1706	1320	0	0	1536	1208	0	0	0	0
2	5	15	""	"iYKL211C"	7740	16010	130	1125	1070	416	82	88	47	100	100	0	2901	2820	1202	92	100	81	98	98	0	0	0	0	0	0	0	0	0	0	0	0	0	0	0	0	0	0	0	0.371	0.362	0.352	0.372	1.538	0.338	0.888	0.000	0.000	0.000	0.000	0.000	0.000	0.000	0.000	0.000	0.000	0.000	0.000	0.000	0.000	120	541	3852	3716	-1.429	Error	Error	1043	2809	0	0	988	2728	0	0	0	0
2	6	15	""	"itT(CGU)K"	7930	16020	130	919	864	280	87	89	33	100	99	0	2427	2309	885	91	96	27	99	99	0	0	0	0	0	0	0	0	0	0	0	0	0	0	0	0	0	0	0	0.356	0.350	0.350	0.369	1.477	0.328	0.897	0.000	0.000	0.000	0.000	0.000	0.000	0.000	0.000	0.000	0.000	0.000	0.000	0.000	0.000	120	526	3168	2995	-1.489	Error	Error	832	2336	0	0	777	2218	0	0	0	0
2	7	15	""	"iYKL205W"	8120	16010	130	1389	1230	662	87	90	51	93	90	0	1625	1429	781	91	96	35	90	88	0	0	0	0	0	0	0	0	0	0	0	0	0	0	0	0	0	0	0	0.849	0.854	0.859	0.900	1.953	0.833	0.898	0.000	0.000	0.000	0.000	0.000	0.000	0.000	0.000	0.000	0.000	0.000	0.000	0.000	0.000	120	483	2836	2481	-0.237	Error	Error	1302	1534	0	0	1143	1338	0	0	0	0
2	8	15	""	"iYKLCdelta2"	8290	16010	120	1074	991	341	82	89	52	96	95	0	632	591	222	92	96	39	94	94	0	0	0	0	0	0	0	0	0	0	0	0	0	0	0	0	0	0	0	1.837	1.822	1.843	1.806	1.744	1.840	0.823	0.000	0.000	0.000	0.000	0.000	0.000	0.000	0.000	0.000	0.000	0.000	0.000	0.000	0.000	120	444	1532	1408	0.877	Error	Error	992	540	0	0	909	499	0	0	0	0
2	9	15	""	"iYKL187C"	8480	16010	130	1264	1370	639	84	91	44	100	100	0	2474	2484	1307	92	99	50	98	98	0	0	0	0	0	0	0	0	0	0	0	0	0	0	0	0	0	0	0	0.495	0.538	0.548	0.581	1.722	0.504	0.862	0.000	0.000	0.000	0.000	0.000	0.000	0.000	0.000	0.000	0.000	0.000	0.000	0.000	0.000	120	573	3562	3678	-1.013	Error	Error	1180	2382	0	0	1286	2392	0	0	0	0
2	10	15	""	"iYKL183W"	8680	16010	130	708	709	316	85	89	38	98	96	0	2407	2356	1208	95	98	29	98	98	0	0	0	0	0	0	0	0	0	0	0	0	0	0	0	0	0	0	0	0.269	0.276	0.287	0.300	1.889	0.248	0.848	0.000	0.000	0.000	0.000	0.000	0.000	0.000	0.000	0.000	0.000	0.000	0.000	0.000	0.000	120	521	2935	2885	-1.892	Error	Error	623	2312	0	0	624	2261	0	0	0	0
2	11	15	""	"iYKL166C-1"	8860	16010	140	1030	1039	470	91	93	38	99	97	0	1913	2025	1672	96	100	32	97	96	0	0	0	0	0	0	0	0	0	0	0	0	0	0	0	0	0	0	0	0.517	0.491	0.514	0.557	1.946	0.326	0.605	0.000	0.000	0.000	0.000	0.000	0.000	0.000	0.000	0.000	0.000	0.000	0.000	0.000	0.000	156	483	2756	2877	-0.952	Error	Error	939	1817	0	0	948	1929	0	0	0	0
2	12	15	""	"iYKL164C-1"	9060	16010	140	1186	1165	519	90	93	37	97	97	0	2857	2761	1315	94	101	56	94	94	0	0	0	0	0	0	0	0	0	0	0	0	0	0	0	0	0	0	0	0.397	0.403	0.412	0.456	2.154	0.378	0.846	0.000	0.000	0.000	0.000	0.000	0.000	0.000	0.000	0.000	0.000	0.000	0.000	0.000	0.000	156	445	3859	3742	-1.334	Error	Error	1096	2763	0	0	1075	2667	0	0	0	0
2	13	15	""	"iYKL162C"	9240	16010	140	1617	1652	765	85	88	34	99	99	0	3242	3112	1686	92	99	56	97	95	0	0	0	0	0	0	0	0	0	0	0	0	0	0	0	0	0	0	0	0.486	0.519	0.529	0.563	1.729	0.472	0.878	0.000	0.000	0.000	0.000	0.000	0.000	0.000	0.000	0.000	0.000	0.000	0.000	0.000	0.000	156	451	4682	4587	-1.040	Error	Error	1532	3150	0	0	1567	3020	0	0	0	0
2	14	15	""	"iYKL148C"	9420	16010	130	660	657	273	83	88	36	99	98	0	1704	1707	746	92	109	110	97	95	0	0	0	0	0	0	0	0	0	0	0	0	0	0	0	0	0	0	0	0.358	0.355	0.361	0.362	1.464	0.332	0.836	0.000	0.000	0.000	0.000	0.000	0.000	0.000	0.000	0.000	0.000	0.000	0.000	0.000	0.000	120	454	2189	2189	-1.482	Error	Error	577	1612	0	0	574	1615	0	0	0	0
2	15	15	""	"iYKL143W"	9610	16010	130	1021	916	414	86	92	38	95	90	0	2635	2339	1142	96	119	141	90	88	0	0	0	0	0	0	0	0	0	0	0	0	0	0	0	0	0	0	0	0.368	0.370	0.376	0.391	1.872	0.354	0.880	0.000	0.000	0.000	0.000	0.000	0.000	0.000	0.000	0.000	0.000	0.000	0.000	0.000	0.000	120	518	3474	3073	-1.441	Error	Error	935	2539	0	0	830	2243	0	0	0	0
2	16	15	""	"iYKL139W"	9800	16010	120	6607	8159	5805	91	105	105	100	100	0	1187	1385	1008	94	115	118	87	84	0	0	0	0	0	0	0	0	0	0	0	0	0	0	0	0	0	0	0	5.962	6.249	6.063	6.866	1.851	6.309	0.878	0.000	0.000	0.000	0.000	0.000	0.000	0.000	0.000	0.000	0.000	0.000	0.000	0.000	0.000	120	536	7609	9359	2.576	Error	Error	6516	1093	0	0	8068	1291	0	0	0	0
2	17	15	""	"iYLL025W"	10020	16010	140	4137	3923	1538	88	101	105	99	98	0	1565	1440	623	93	105	75	94	91	0	0	0	0	0	0	0	0	0	0	0	0	0	0	0	0	0	0	0	2.751	2.847	2.793	3.109	1.783	2.930	0.875	0.000	0.000	0.000	0.000	0.000	0.000	0.000	0.000	0.000	0.000	0.000	0.000	0.000	0.000	156	534	5521	5182	1.460	Error	Error	4049	1472	0	0	3835	1347	0	0	0	0
2	18	15	""	"iYLL021W"	10190	16010	140	800	818	451	90	91	33	97	94	0	359	373	212	96	99	27	87	84	0	0	0	0	0	0	0	0	0	0	0	0	0	0	0	0	0	0	0	2.700	2.628	2.670	2.712	1.840	2.542	0.820	0.000	0.000	0.000	0.000	0.000	0.000	0.000	0.000	0.000	0.000	0.000	0.000	0.000	0.000	156	424	973	1005	1.433	Error	Error	710	263	0	0	728	277	0	0	0	0
2	19	15	""	"iYLL017W"	10370	16010	120	1014	1099	666	90	94	34	100	98	0	1971	2101	1326	96	100	29	96	95	0	0	0	0	0	0	0	0	0	0	0	0	0	0	0	0	0	0	0	0.493	0.503	0.513	0.549	1.858	0.474	0.883	0.000	0.000	0.000	0.000	0.000	0.000	0.000	0.000	0.000	0.000	0.000	0.000	0.000	0.000	120	398	2799	3014	-1.021	Error	Error	924	1875	0	0	1009	2005	0	0	0	0
2	20	15	""	"iYLL001W"	10560	16010	140	5236	5042	1669	91	96	38	100	100	0	1682	1583	541	98	103	39	98	98	0	0	0	0	0	0	0	0	0	0	0	0	0	0	0	0	0	0	0	3.248	3.334	3.379	3.482	1.542	3.444	0.894	0.000	0.000	0.000	0.000	0.000	0.000	0.000	0.000	0.000	0.000	0.000	0.000	0.000	0.000	156	511	6729	6436	1.700	Error	Error	5145	1584	0	0	4951	1485	0	0	0	0
2	21	15	""	"iYLR003C"	10760	16010	120	1069	988	385	89	93	36	97	95	0	1024	908	414	95	97	27	91	88	0	0	0	0	0	0	0	0	0	0	0	0	0	0	0	0	0	0	0	1.055	1.106	1.092	1.279	2.230	1.044	0.865	0.000	0.000	0.000	0.000	0.000	0.000	0.000	0.000	0.000	0.000	0.000	0.000	0.000	0.000	120	468	1909	1712	0.077	Error	Error	980	929	0	0	899	813	0	0	0	0
2	22	15	""	"iYLR007W"	10930	16020	100	2038	1853	877	89	122	187	92	87	0	1550	1340	680	97	133	207	83	82	0	0	0	0	0	0	0	0	0	0	0	0	0	0	0	0	0	0	0	1.341	1.419	1.394	1.591	1.923	1.363	0.879	0.000	0.000	0.000	0.000	0.000	0.000	0.000	0.000	0.000	0.000	0.000	0.000	0.000	0.000	80	426	3402	3007	0.424	Error	Error	1949	1453	0	0	1764	1243	0	0	0	0
2	1	16	""	"iYLR024C"	6950	16200	120	773	927	627	91	97	40	97	96	0	1200	1459	1155	98	106	41	99	96	0	0	0	0	0	0	0	0	0	0	0	0	0	0	0	0	0	0	0	0.619	0.614	0.646	0.695	2.067	0.550	0.818	0.000	0.000	0.000	0.000	0.000	0.000	0.000	0.000	0.000	0.000	0.000	0.000	0.000	0.000	120	507	1784	2197	-0.692	Error	Error	682	1102	0	0	836	1361	0	0	0	0
2	2	16	""	"iYLR028C"	7140	16200	140	805	801	344	90	107	125	92	91	0	1373	1418	714	97	110	91	94	91	0	0	0	0	0	0	0	0	0	0	0	0	0	0	0	0	0	0	0	0.560	0.538	0.550	0.574	1.790	0.503	0.773	0.000	0.000	0.000	0.000	0.000	0.000	0.000	0.000	0.000	0.000	0.000	0.000	0.000	0.000	156	536	1991	2032	-0.836	Error	Error	715	1276	0	0	711	1321	0	0	0	0
2	3	16	""	"iYLR032W"	7330	16200	130	2894	2708	1147	91	110	131	100	99	0	1408	1369	616	96	106	54	98	98	0	0	0	0	0	0	0	0	0	0	0	0	0	0	0	0	0	0	0	2.136	2.056	2.058	2.153	1.445	2.047	0.896	0.000	0.000	0.000	0.000	0.000	0.000	0.000	0.000	0.000	0.000	0.000	0.000	0.000	0.000	120	479	4115	3890	1.095	Error	Error	2803	1312	0	0	2617	1273	0	0	0	0
2	4	16	""	"iYLR044C"	7520	16200	140	1492	1394	504	84	98	84	98	98	0	4860	4551	1782	94	100	32	99	99	0	0	0	0	0	0	0	0	0	0	0	0	0	0	0	0	0	0	0	0.295	0.294	0.289	0.306	1.577	0.274	0.905	0.000	0.000	0.000	0.000	0.000	0.000	0.000	0.000	0.000	0.000	0.000	0.000	0.000	0.000	156	529	6174	5767	-1.759	Error	Error	1408	4766	0	0	1310	4457	0	0	0	0
2	5	16	""	"iYLR048W"	7720	16200	130	1205	1238	544	82	94	81	98	98	0	943	931	403	91	95	29	100	99	0	0	0	0	0	0	0	0	0	0	0	0	0	0	0	0	0	0	0	1.318	1.376	1.411	1.400	1.514	1.377	0.884	0.000	0.000	0.000	0.000	0.000	0.000	0.000	0.000	0.000	0.000	0.000	0.000	0.000	0.000	120	549	1975	1996	0.398	Error	Error	1123	852	0	0	1156	840	0	0	0	0
2	6	16	""	"iYLR052W"	7910	16200	130	785	766	265	84	87	32	100	99	0	1226	1137	462	89	94	27	95	95	0	0	0	0	0	0	0	0	0	0	0	0	0	0	0	0	0	0	0	0.617	0.651	0.651	0.746	1.886	0.622	0.873	0.000	0.000	0.000	0.000	0.000	0.000	0.000	0.000	0.000	0.000	0.000	0.000	0.000	0.000	120	553	1838	1730	-0.698	Error	Error	701	1137	0	0	682	1048	0	0	0	0
2	7	16	""	"iYLR364W"	8120	16190	130	1176	1148	455	83	87	33	100	99	0	3275	3171	1386	91	95	27	98	98	0	0	0	0	0	0	0	0	0	0	0	0	0	0	0	0	0	0	0	0.343	0.346	0.352	0.376	1.808	0.323	0.875	0.000	0.000	0.000	0.000	0.000	0.000	0.000	0.000	0.000	0.000	0.000	0.000	0.000	0.000	120	542	4277	4145	-1.543	Error	Error	1093	3184	0	0	1065	3080	0	0	0	0
2	8	16	""	"iYLR369W"	8300	16200	130	1782	1649	547	83	88	40	100	100	0	1949	1730	663	91	96	28	98	98	0	0	0	0	0	0	0	0	0	0	0	0	0	0	0	0	0	0	0	0.914	0.955	0.962	1.045	1.649	0.911	0.892	0.000	0.000	0.000	0.000	0.000	0.000	0.000	0.000	0.000	0.000	0.000	0.000	0.000	0.000	120	553	3557	3205	-0.129	Error	Error	1699	1858	0	0	1566	1639	0	0	0	0
2	9	16	""	"iYLR373C"	8500	16210	110	590	583	234	87	92	45	96	91	0	862	787	320	93	103	57	92	91	0	0	0	0	0	0	0	0	0	0	0	0	0	0	0	0	0	0	0	0.654	0.715	0.685	0.713	1.419	0.701	0.849	0.000	0.000	0.000	0.000	0.000	0.000	0.000	0.000	0.000	0.000	0.000	0.000	0.000	0.000	80	476	1272	1190	-0.612	Error	Error	503	769	0	0	496	694	0	0	0	0
2	10	16	""	"iYLR389C"	8700	16200	130	1389	1284	470	86	89	36	99	99	0	3230	2989	1209	97	104	56	100	99	0	0	0	0	0	0	0	0	0	0	0	0	0	0	0	0	0	0	0	0.416	0.414	0.408	0.430	1.601	0.380	0.868	0.000	0.000	0.000	0.000	0.000	0.000	0.000	0.000	0.000	0.000	0.000	0.000	0.000	0.000	120	500	4436	4090	-1.266	Error	Error	1303	3133	0	0	1198	2892	0	0	0	0
2	11	16	""	"iYLR394W"	8880	16200	140	8968	7936	4316	88	95	71	98	98	0	3400	2901	1604	98	105	72	93	88	0	0	0	0	0	0	0	0	0	0	0	0	0	0	0	0	0	0	0	2.689	2.800	2.808	3.181	2.036	2.903	0.899	0.000	0.000	0.000	0.000	0.000	0.000	0.000	0.000	0.000	0.000	0.000	0.000	0.000	0.000	156	476	12182	10651	1.427	Error	Error	8880	3302	0	0	7848	2803	0	0	0	0
2	12	16	""	"iYLR398C"	9070	16200	140	1277	1181	494	88	96	72	98	96	0	1876	1705	759	95	103	71	95	93	0	0	0	0	0	0	0	0	0	0	0	0	0	0	0	0	0	0	0	0.668	0.679	0.684	0.732	1.785	0.662	0.875	0.000	0.000	0.000	0.000	0.000	0.000	0.000	0.000	0.000	0.000	0.000	0.000	0.000	0.000	156	493	2970	2703	-0.583	Error	Error	1189	1781	0	0	1093	1610	0	0	0	0
2	13	16	""	"iYLR412W-1"	9270	16200	140	1569	1530	586	82	87	34	99	99	0	1917	1798	712	91	95	27	98	98	0	0	0	0	0	0	0	0	0	0	0	0	0	0	0	0	0	0	0	0.814	0.848	0.854	0.864	1.502	0.847	0.891	0.000	0.000	0.000	0.000	0.000	0.000	0.000	0.000	0.000	0.000	0.000	0.000	0.000	0.000	156	468	3313	3155	-0.296	Error	Error	1487	1826	0	0	1448	1707	0	0	0	0
2	14	16	""	"iYLR417W"	9450	16200	130	3176	2871	948	82	89	39	100	99	0	1930	1753	610	93	103	84	98	96	0	0	0	0	0	0	0	0	0	0	0	0	0	0	0	0	0	0	0	1.684	1.680	1.668	1.788	1.646	1.688	0.905	0.000	0.000	0.000	0.000	0.000	0.000	0.000	0.000	0.000	0.000	0.000	0.000	0.000	0.000	120	484	4931	4449	0.752	Error	Error	3094	1837	0	0	2789	1660	0	0	0	0
2	15	16	""	"iYLRCdelta24"	9640	16200	130	1254	1163	407	85	91	36	100	98	0	1640	1459	513	94	104	79	96	95	0	0	0	0	0	0	0	0	0	0	0	0	0	0	0	0	0	0	0	0.756	0.790	0.785	0.822	1.500	0.770	0.903	0.000	0.000	0.000	0.000	0.000	0.000	0.000	0.000	0.000	0.000	0.000	0.000	0.000	0.000	120	563	2715	2443	-0.403	Error	Error	1169	1546	0	0	1078	1365	0	0	0	0
2	16	16	""	"iYLR436C"	9830	16210	110	436	465	195	84	91	37	100	100	0	770	811	416	92	102	56	97	95	0	0	0	0	0	0	0	0	0	0	0	0	0	0	0	0	0	0	0	0.519	0.530	0.538	0.552	1.613	0.459	0.752	0.000	0.000	0.000	0.000	0.000	0.000	0.000	0.000	0.000	0.000	0.000	0.000	0.000	0.000	80	489	1030	1100	-0.946	Error	Error	352	678	0	0	381	719	0	0	0	0
2	17	16	""	"iYLR439W"	10030	16210	130	1278	1231	514	85	87	32	98	97	0	486	466	201	91	98	53	91	90	0	0	0	0	0	0	0	0	0	0	0	0	0	0	0	0	0	0	0	3.020	3.056	3.009	3.068	1.727	3.067	0.860	0.000	0.000	0.000	0.000	0.000	0.000	0.000	0.000	0.000	0.000	0.000	0.000	0.000	0.000	120	518	1588	1521	1.595	Error	Error	1193	395	0	0	1146	375	0	0	0	0
2	18	16	""	"iYLR444C"	10200	16200	130	732	722	235	86	88	31	98	97	0	1364	1255	434	92	95	26	96	96	0	0	0	0	0	0	0	0	0	0	0	0	0	0	0	0	0	0	0	0.508	0.547	0.551	0.548	1.395	0.509	0.858	0.000	0.000	0.000	0.000	0.000	0.000	0.000	0.000	0.000	0.000	0.000	0.000	0.000	0.000	120	454	1918	1799	-0.977	Error	Error	646	1272	0	0	636	1163	0	0	0	0
2	19	16	""	"iYMR130W"	10400	16200	140	6429	5600	2490	89	94	35	100	99	0	1152	980	488	95	99	26	89	88	0	0	0	0	0	0	0	0	0	0	0	0	0	0	0	0	0	0	0	5.998	6.227	6.133	7.019	1.967	6.176	0.900	0.000	0.000	0.000	0.000	0.000	0.000	0.000	0.000	0.000	0.000	0.000	0.000	0.000	0.000	156	513	7397	6396	2.585	Error	Error	6340	1057	0	0	5511	885	0	0	0	0
2	20	16	""	"iYMR134W"	10600	16200	130	1702	1686	732	94	100	39	100	100	0	1622	1574	701	97	100	28	100	98	0	0	0	0	0	0	0	0	0	0	0	0	0	0	0	0	0	0	0	1.054	1.078	1.089	1.147	1.570	1.070	0.896	0.000	0.000	0.000	0.000	0.000	0.000	0.000	0.000	0.000	0.000	0.000	0.000	0.000	0.000	120	492	3133	3069	0.076	Error	Error	1608	1525	0	0	1592	1477	0	0	0	0
2	21	16	""	"iYMR138W"	10780	16200	130	1366	1386	626	93	98	37	98	98	0	3742	3768	1884	98	101	28	100	100	0	0	0	0	0	0	0	0	0	0	0	0	0	0	0	0	0	0	0	0.349	0.352	0.355	0.363	1.538	0.331	0.906	0.000	0.000	0.000	0.000	0.000	0.000	0.000	0.000	0.000	0.000	0.000	0.000	0.000	0.000	120	527	4917	4963	-1.517	Error	Error	1273	3644	0	0	1293	3670	0	0	0	0
2	22	16	""	"iYMR155W"	10970	16200	120	1920	1695	751	89	97	62	95	92	0	957	848	428	97	104	84	85	83	0	0	0	0	0	0	0	0	0	0	0	0	0	0	0	0	0	0	0	2.129	2.138	2.090	2.242	1.642	2.048	0.880	0.000	0.000	0.000	0.000	0.000	0.000	0.000	0.000	0.000	0.000	0.000	0.000	0.000	0.000	120	593	2691	2357	1.090	Error	Error	1831	860	0	0	1606	751	0	0	0	0
2	1	17	""	"itM(CAU)M"	6990	16390	130	1142	1095	282	90	96	42	100	100	0	634	622	172	97	105	41	98	97	0	0	0	0	0	0	0	0	0	0	0	0	0	0	0	0	0	0	0	1.959	1.914	1.927	2.018	1.597	1.888	0.865	0.000	0.000	0.000	0.000	0.000	0.000	0.000	0.000	0.000	0.000	0.000	0.000	0.000	0.000	120	604	1589	1530	0.970	Error	Error	1052	537	0	0	1005	525	0	0	0	0
2	2	17	""	"iYMR161W"	7170	16390	130	7319	6964	2300	91	102	80	100	100	0	2355	2281	780	95	103	40	98	98	0	0	0	0	0	0	0	0	0	0	0	0	0	0	0	0	0	0	0	3.198	3.144	3.105	3.330	1.542	3.268	0.911	0.000	0.000	0.000	0.000	0.000	0.000	0.000	0.000	0.000	0.000	0.000	0.000	0.000	0.000	120	510	9488	9059	1.677	Error	Error	7228	2260	0	0	6873	2186	0	0	0	0
2	3	17	""	"iYMR176W"	7370	16390	130	2153	2096	803	89	97	41	100	100	0	3306	3116	1275	95	102	37	100	100	0	0	0	0	0	0	0	0	0	0	0	0	0	0	0	0	0	0	0	0.643	0.664	0.666	0.705	1.493	0.632	0.905	0.000	0.000	0.000	0.000	0.000	0.000	0.000	0.000	0.000	0.000	0.000	0.000	0.000	0.000	120	520	5275	5028	-0.638	Error	Error	2064	3211	0	0	2007	3021	0	0	0	0
2	4	17	""	"iYMR180C"	7550	16390	130	1454	1368	460	85	90	42	100	100	0	2608	2443	928	92	101	48	100	100	0	0	0	0	0	0	0	0	0	0	0	0	0	0	0	0	0	0	0	0.544	0.546	0.558	0.575	1.420	0.511	0.871	0.000	0.000	0.000	0.000	0.000	0.000	0.000	0.000	0.000	0.000	0.000	0.000	0.000	0.000	120	511	3885	3634	-0.878	Error	Error	1369	2516	0	0	1283	2351	0	0	0	0
2	5	17	""	"iYMR183C"	7750	16400	130	1158	1084	455	84	89	35	100	99	0	1804	1622	704	90	97	57	96	94	0	0	0	0	0	0	0	0	0	0	0	0	0	0	0	0	0	0	0	0.627	0.653	0.680	0.692	1.603	0.633	0.899	0.000	0.000	0.000	0.000	0.000	0.000	0.000	0.000	0.000	0.000	0.000	0.000	0.000	0.000	120	570	2788	2532	-0.674	Error	Error	1074	1714	0	0	1000	1532	0	0	0	0
2	6	17	""	"iYMR198W"	7940	16390	130	2011	1942	585	84	88	32	100	100	0	6370	6001	2054	90	94	29	100	100	0	0	0	0	0	0	0	0	0	0	0	0	0	0	0	0	0	0	0	0.307	0.314	0.318	0.334	1.443	0.296	0.919	0.000	0.000	0.000	0.000	0.000	0.000	0.000	0.000	0.000	0.000	0.000	0.000	0.000	0.000	120	583	8207	7769	-1.704	Error	Error	1927	6280	0	0	1858	5911	0	0	0	0
2	7	17	""	"iYMR202W"	8140	16390	130	736	712	277	83	87	32	99	97	0	565	561	223	89	94	29	92	91	0	0	0	0	0	0	0	0	0	0	0	0	0	0	0	0	0	0	0	1.372	1.333	1.370	1.418	1.846	0.682	0.296	0.000	0.000	0.000	0.000	0.000	0.000	0.000	0.000	0.000	0.000	0.000	0.000	0.000	0.000	120	568	1129	1101	0.456	Error	Error	653	476	0	0	629	472	0	0	0	0
2	8	17	""	"iYMR206W"	8320	16390	130	4046	4008	1689	84	88	33	100	100	0	5179	4837	2172	90	95	28	100	100	0	0	0	0	0	0	0	0	0	0	0	0	0	0	0	0	0	0	0	0.779	0.827	0.843	0.874	1.406	0.834	0.923	0.000	0.000	0.000	0.000	0.000	0.000	0.000	0.000	0.000	0.000	0.000	0.000	0.000	0.000	120	580	9051	8671	-0.361	Error	Error	3962	5089	0	0	3924	4747	0	0	0	0
2	9	17	""	"iYNL148C"	8540	16390	140	563	510	233	85	93	58	89	83	0	1246	1100	536	92	100	45	91	87	0	0	0	0	0	0	0	0	0	0	0	0	0	0	0	0	0	0	0	0.414	0.422	0.434	0.423	1.978	0.410	0.874	0.000	0.000	0.000	0.000	0.000	0.000	0.000	0.000	0.000	0.000	0.000	0.000	0.000	0.000	156	587	1632	1433	-1.272	Error	Error	478	1154	0	0	425	1008	0	0	0	0
2	10	17	""	"iYNL144C-0"	8720	16390	130	2048	1851	929	87	91	35	98	97	0	4741	4194	2271	96	101	36	92	90	0	0	0	0	0	0	0	0	0	0	0	0	0	0	0	0	0	0	0	0.422	0.430	0.422	0.519	2.093	0.401	0.892	0.000	0.000	0.000	0.000	0.000	0.000	0.000	0.000	0.000	0.000	0.000	0.000	0.000	0.000	120	456	6606	5862	-1.244	Error	Error	1961	4645	0	0	1764	4098	0	0	0	0
2	11	17	""	"iYNL141W"	8890	16390	130	7049	6006	2815	85	96	75	95	93	0	2265	1908	1016	97	106	73	85	84	0	0	0	0	0	0	0	0	0	0	0	0	0	0	0	0	0	0	0	3.212	3.269	3.180	3.590	1.917	3.166	0.905	0.000	0.000	0.000	0.000	0.000	0.000	0.000	0.000	0.000	0.000	0.000	0.000	0.000	0.000	120	545	9132	7732	1.684	Error	Error	6964	2168	0	0	5921	1811	0	0	0	0
2	12	17	""	"iYNL125C"	9100	16390	130	1418	1322	554	82	93	74	97	95	0	3591	3271	1510	92	102	69	96	95	0	0	0	0	0	0	0	0	0	0	0	0	0	0	0	0	0	0	0	0.382	0.390	0.387	0.421	1.639	0.370	0.887	0.000	0.000	0.000	0.000	0.000	0.000	0.000	0.000	0.000	0.000	0.000	0.000	0.000	0.000	120	562	4835	4419	-1.389	Error	Error	1336	3499	0	0	1240	3179	0	0	0	0
2	13	17	""	"iYNL121C"	9290	16390	130	1269	1174	582	86	100	124	87	84	0	3552	2998	1616	89	111	179	85	83	0	0	0	0	0	0	0	0	0	0	0	0	0	0	0	0	0	0	0	0.342	0.374	0.368	0.469	2.308	0.355	0.882	0.000	0.000	0.000	0.000	0.000	0.000	0.000	0.000	0.000	0.000	0.000	0.000	0.000	0.000	120	468	4646	3997	-1.550	Error	Error	1183	3463	0	0	1088	2909	0	0	0	0
2	14	17	""	"iYNL116W"	9450	16390	130	4383	3713	1592	91	114	132	95	94	0	1862	1567	764	93	136	253	85	81	0	0	0	0	0	0	0	0	0	0	0	0	0	0	0	0	0	0	0	2.426	2.457	2.452	2.708	2.000	2.424	0.907	0.000	0.000	0.000	0.000	0.000	0.000	0.000	0.000	0.000	0.000	0.000	0.000	0.000	0.000	120	517	6061	5096	1.279	Error	Error	4292	1769	0	0	3622	1474	0	0	0	0
2	15	17	""	"iYNL097C"	9660	16390	130	3676	3338	1622	87	104	92	97	96	0	4345	3958	2035	96	114	103	95	92	0	0	0	0	0	0	0	0	0	0	0	0	0	0	0	0	0	0	0	0.845	0.842	0.858	0.954	1.771	0.808	0.916	0.000	0.000	0.000	0.000	0.000	0.000	0.000	0.000	0.000	0.000	0.000	0.000	0.000	0.000	120	579	7838	7113	-0.244	Error	Error	3589	4249	0	0	3251	3862	0	0	0	0
2	16	17	""	"iYNL094W"	9850	16400	130	1764	1822	921	85	89	35	100	98	0	3384	3714	2081	92	100	38	96	95	0	0	0	0	0	0	0	0	0	0	0	0	0	0	0	0	0	0	0	0.510	0.480	0.504	0.543	1.915	0.455	0.916	0.000	0.000	0.000	0.000	0.000	0.000	0.000	0.000	0.000	0.000	0.000	0.000	0.000	0.000	120	549	4971	5359	-0.971	Error	Error	1679	3292	0	0	1737	3622	0	0	0	0
2	17	17	""	"iYNL089C"	10030	16390	130	723	766	364	87	89	32	96	95	0	1494	1607	783	90	97	46	96	95	0	0	0	0	0	0	0	0	0	0	0	0	0	0	0	0	0	0	0	0.453	0.448	0.443	0.445	1.549	0.423	0.871	0.000	0.000	0.000	0.000	0.000	0.000	0.000	0.000	0.000	0.000	0.000	0.000	0.000	0.000	120	532	2040	2196	-1.142	Error	Error	636	1404	0	0	679	1517	0	0	0	0
2	18	17	""	"iYNL073W"	10240	16390	140	1666	1480	679	85	89	33	97	94	0	2172	1899	878	92	97	45	91	89	0	0	0	0	0	0	0	0	0	0	0	0	0	0	0	0	0	0	0	0.760	0.772	0.779	0.804	1.701	0.773	0.886	0.000	0.000	0.000	0.000	0.000	0.000	0.000	0.000	0.000	0.000	0.000	0.000	0.000	0.000	156	524	3661	3202	-0.396	Error	Error	1581	2080	0	0	1395	1807	0	0	0	0
2	19	17	""	"iYNL069C"	10420	16390	140	1043	1153	683	89	95	38	96	94	0	2812	3163	2046	97	101	28	96	93	0	0	0	0	0	0	0	0	0	0	0	0	0	0	0	0	0	0	0	0.351	0.347	0.352	0.386	1.934	0.325	0.899	0.000	0.000	0.000	0.000	0.000	0.000	0.000	0.000	0.000	0.000	0.000	0.000	0.000	0.000	156	494	3669	4130	-1.509	Error	Error	954	2715	0	0	1064	3066	0	0	0	0
2	20	17	""	"iYNL065W"	10610	16390	130	6567	6008	2137	96	112	92	100	99	0	2378	2114	813	98	108	60	95	95	0	0	0	0	0	0	0	0	0	0	0	0	0	0	0	0	0	0	0	2.838	2.933	2.915	3.077	1.408	2.917	0.915	0.000	0.000	0.000	0.000	0.000	0.000	0.000	0.000	0.000	0.000	0.000	0.000	0.000	0.000	120	538	8751	7928	1.505	Error	Error	6471	2280	0	0	5912	2016	0	0	0	0
2	21	17	""	"itG(GCC)O2"	10810	16400	120	2314	2163	772	93	103	55	100	100	0	1593	1476	616	98	103	38	97	95	0	0	0	0	0	0	0	0	0	0	0	0	0	0	0	0	0	0	0	1.486	1.502	1.523	1.660	1.626	1.453	0.908	0.000	0.000	0.000	0.000	0.000	0.000	0.000	0.000	0.000	0.000	0.000	0.000	0.000	0.000	120	515	3716	3448	0.571	Error	Error	2221	1495	0	0	2070	1378	0	0	0	0
2	22	17	""	"iYOL019W"	10990	16390	130	8816	7701	3850	92	103	79	94	91	0	3298	2934	1589	94	104	87	89	86	0	0	0	0	0	0	0	0	0	0	0	0	0	0	0	0	0	0	0	2.723	2.679	2.652	2.742	1.806	2.639	0.913	0.000	0.000	0.000	0.000	0.000	0.000	0.000	0.000	0.000	0.000	0.000	0.000	0.000	0.000	120	648	11928	10449	1.445	Error	Error	8724	3204	0	0	7609	2840	0	0	0	0
2	1	18	""	"iYOL015W"	7000	16580	130	5522	5712	2716	97	109	75	99	97	0	2206	2241	1105	101	116	82	94	92	0	0	0	0	0	0	0	0	0	0	0	0	0	0	0	0	0	0	0	2.577	2.624	2.608	2.785	1.650	2.629	0.912	0.000	0.000	0.000	0.000	0.000	0.000	0.000	0.000	0.000	0.000	0.000	0.000	0.000	0.000	120	656	7530	7755	1.366	Error	Error	5425	2105	0	0	5615	2140	0	0	0	0
2	2	18	""	"iYOL001W"	7190	16580	130	782	766	302	94	108	81	95	91	0	543	540	239	97	120	141	85	75	0	0	0	0	0	0	0	0	0	0	0	0	0	0	0	0	0	0	0	1.543	1.517	1.477	1.623	1.620	1.365	0.623	0.000	0.000	0.000	0.000	0.000	0.000	0.000	0.000	0.000	0.000	0.000	0.000	0.000	0.000	120	561	1134	1115	0.625	Error	Error	688	446	0	0	672	443	0	0	0	0
2	3	18	""	"iYOR003W"	7390	16580	130	3168	3247	1510	89	95	43	99	98	0	2241	2197	1067	94	104	57	94	93	0	0	0	0	0	0	0	0	0	0	0	0	0	0	0	0	0	0	0	1.434	1.502	1.512	1.702	2.026	1.508	0.897	0.000	0.000	0.000	0.000	0.000	0.000	0.000	0.000	0.000	0.000	0.000	0.000	0.000	0.000	120	532	5226	5261	0.520	Error	Error	3079	2147	0	0	3158	2103	0	0	0	0
2	4	18	""	"iYOR007C"	7570	16580	130	2930	2726	1085	87	100	103	97	96	0	1696	1585	689	92	115	141	90	89	0	0	0	0	0	0	0	0	0	0	0	0	0	0	0	0	0	0	0	1.772	1.768	1.805	1.951	1.816	1.733	0.903	0.000	0.000	0.000	0.000	0.000	0.000	0.000	0.000	0.000	0.000	0.000	0.000	0.000	0.000	120	539	4447	4132	0.826	Error	Error	2843	1604	0	0	2639	1493	0	0	0	0
2	5	18	""	"iYOR018W"	7770	16590	130	10486	10221	5642	89	102	103	100	100	0	2255	2307	1237	93	112	133	93	91	0	0	0	0	0	0	0	0	0	0	0	0	0	0	0	0	0	0	0	4.809	4.576	4.448	4.800	1.600	4.835	0.894	0.000	0.000	0.000	0.000	0.000	0.000	0.000	0.000	0.000	0.000	0.000	0.000	0.000	0.000	120	528	12559	12346	2.266	Error	Error	10397	2162	0	0	10132	2214	0	0	0	0
2	6	18	""	"iYOR021C"	7950	16590	120	1997	1804	616	90	98	48	100	100	0	2778	2544	930	93	103	52	100	99	0	0	0	0	0	0	0	0	0	0	0	0	0	0	0	0	0	0	0	0.710	0.699	0.703	0.728	1.437	0.682	0.908	0.000	0.000	0.000	0.000	0.000	0.000	0.000	0.000	0.000	0.000	0.000	0.000	0.000	0.000	120	495	4592	4165	-0.494	Error	Error	1907	2685	0	0	1714	2451	0	0	0	0
2	7	18	""	"iYOR026W"	8150	16590	130	828	742	366	88	99	75	86	81	0	1645	1420	743	94	112	168	83	81	0	0	0	0	0	0	0	0	0	0	0	0	0	0	0	0	0	0	0	0.477	0.493	0.505	0.525	1.830	0.469	0.877	0.000	0.000	0.000	0.000	0.000	0.000	0.000	0.000	0.000	0.000	0.000	0.000	0.000	0.000	120	569	2291	1980	-1.068	Error	Error	740	1551	0	0	654	1326	0	0	0	0
2	8	18	""	"iYOR042W"	8350	16590	130	458	441	174	87	92	39	95	90	0	1201	1060	454	92	98	35	94	90	0	0	0	0	0	0	0	0	0	0	0	0	0	0	0	0	0	0	0	0.335	0.366	0.357	0.363	1.826	0.342	0.775	0.000	0.000	0.000	0.000	0.000	0.000	0.000	0.000	0.000	0.000	0.000	0.000	0.000	0.000	120	544	1480	1322	-1.580	Error	Error	371	1109	0	0	354	968	0	0	0	0
2	9	18	""	"iYOR045W"	8520	16580	130	7346	7211	2673	90	125	280	99	99	0	1678	1593	638	93	111	112	95	92	0	0	0	0	0	0	0	0	0	0	0	0	0	0	0	0	0	0	0	4.578	4.747	4.824	5.325	1.773	4.740	0.916	0.000	0.000	0.000	0.000	0.000	0.000	0.000	0.000	0.000	0.000	0.000	0.000	0.000	0.000	120	476	8841	8621	2.195	Error	Error	7256	1585	0	0	7121	1500	0	0	0	0
2	10	18	""	"iYOR049C"	8700	16580	130	3853	3477	1439	93	128	260	95	94	0	3606	3046	1469	98	116	108	94	90	0	0	0	0	0	0	0	0	0	0	0	0	0	0	0	0	0	0	0	1.072	1.148	1.115	1.336	1.961	1.088	0.899	0.000	0.000	0.000	0.000	0.000	0.000	0.000	0.000	0.000	0.000	0.000	0.000	0.000	0.000	120	563	7268	6332	0.100	Error	Error	3760	3508	0	0	3384	2948	0	0	0	0
2	11	18	""	"iYOR356W"	8890	16570	80	332	317	149	90	93	38	86	78	0	462	418	193	102	112	52	88	76	0	0	0	0	0	0	0	0	0	0	0	0	0	0	0	0	0	0	0	0.672	0.718	0.679	0.654	2.135	0.686	0.734	0.000	0.000	0.000	0.000	0.000	0.000	0.000	0.000	0.000	0.000	0.000	0.000	0.000	0.000	52	320	602	543	-0.573	Error	Error	242	360	0	0	227	316	0	0	0	0
2	12	18	""	"iYOR360C"	9100	16560	90	1329	1584	1198	82	96	51	98	94	0	1371	2174	1718	97	116	74	92	88	0	0	0	0	0	0	0	0	0	0	0	0	0	0	0	0	0	0	0	0.979	0.723	0.726	0.802	2.213	0.668	0.794	0.000	0.000	0.000	0.000	0.000	0.000	0.000	0.000	0.000	0.000	0.000	0.000	0.000	0.000	52	371	2521	3579	-0.031	Error	Error	1247	1274	0	0	1502	2077	0	0	0	0
2	13	18	""	"iYOR366W"	9280	16570	110	3131	2825	992	90	128	198	96	95	0	2554	2263	902	93	147	262	88	87	0	0	0	0	0	0	0	0	0	0	0	0	0	0	0	0	0	0	0	1.236	1.260	1.224	1.452	1.912	1.246	0.906	0.000	0.000	0.000	0.000	0.000	0.000	0.000	0.000	0.000	0.000	0.000	0.000	0.000	0.000	80	463	5502	4905	0.305	Error	Error	3041	2461	0	0	2735	2170	0	0	0	0
2	14	18	""	"iYOR380W-1"	9460	16580	130	2145	1989	1027	95	140	214	85	82	0	5083	4537	2678	95	192	473	84	82	0	0	0	0	0	0	0	0	0	0	0	0	0	0	0	0	0	0	0	0.411	0.426	0.436	0.522	2.409	0.394	0.898	0.000	0.000	0.000	0.000	0.000	0.000	0.000	0.000	0.000	0.000	0.000	0.000	0.000	0.000	120	585	7038	6336	-1.283	Error	Error	2050	4988	0	0	1894	4442	0	0	0	0
2	15	18	""	"iYOR383C"	9670	16580	130	4492	4292	1798	88	108	117	97	96	0	3532	3247	1517	96	157	412	91	88	0	0	0	0	0	0	0	0	0	0	0	0	0	0	0	0	0	0	0	1.282	1.334	1.339	1.495	1.806	1.287	0.879	0.000	0.000	0.000	0.000	0.000	0.000	0.000	0.000	0.000	0.000	0.000	0.000	0.000	0.000	120	606	7840	7355	0.358	Error	Error	4404	3436	0	0	4204	3151	0	0	0	0
2	16	18	""	"iYOR387C-0"	9870	16590	130	1505	1536	846	87	92	41	98	95	0	2118	2093	1181	91	100	67	94	94	0	0	0	0	0	0	0	0	0	0	0	0	0	0	0	0	0	0	0	0.700	0.724	0.714	0.761	1.618	0.710	0.909	0.000	0.000	0.000	0.000	0.000	0.000	0.000	0.000	0.000	0.000	0.000	0.000	0.000	0.000	120	540	3445	3451	-0.515	Error	Error	1418	2027	0	0	1449	2002	0	0	0	0
2	17	18	""	"iYPL275W-2"	10050	16590	130	1025	1031	535	88	90	33	93	90	0	3067	3003	1818	90	97	43	88	88	0	0	0	0	0	0	0	0	0	0	0	0	0	0	0	0	0	0	0	0.315	0.324	0.326	0.362	2.231	0.298	0.880	0.000	0.000	0.000	0.000	0.000	0.000	0.000	0.000	0.000	0.000	0.000	0.000	0.000	0.000	120	532	3914	3856	-1.668	Error	Error	937	2977	0	0	943	2913	0	0	0	0
2	18	18	""	"iYPL272C-1"	10230	16580	130	943	930	556	88	92	36	91	89	0	2473	2663	1819	91	97	33	90	87	0	0	0	0	0	0	0	0	0	0	0	0	0	0	0	0	0	0	0	0.359	0.327	0.327	0.340	1.975	0.301	0.876	0.000	0.000	0.000	0.000	0.000	0.000	0.000	0.000	0.000	0.000	0.000	0.000	0.000	0.000	120	527	3237	3414	-1.478	Error	Error	855	2382	0	0	842	2572	0	0	0	0
2	19	18	""	"iYPL268W"	10420	16580	130	1464	1401	533	91	98	43	98	97	0	2172	1939	793	95	103	38	94	93	0	0	0	0	0	0	0	0	0	0	0	0	0	0	0	0	0	0	0	0.661	0.710	0.703	0.770	1.729	0.685	0.880	0.000	0.000	0.000	0.000	0.000	0.000	0.000	0.000	0.000	0.000	0.000	0.000	0.000	0.000	120	515	3450	3154	-0.597	Error	Error	1373	2077	0	0	1310	1844	0	0	0	0
2	20	18	""	"iYPL253C"	10600	16580	130	10236	10600	5047	98	144	254	97	96	0	2199	2103	1033	98	119	112	93	90	0	0	0	0	0	0	0	0	0	0	0	0	0	0	0	0	0	0	0	4.825	5.238	5.187	5.647	1.605	5.209	0.922	0.000	0.000	0.000	0.000	0.000	0.000	0.000	0.000	0.000	0.000	0.000	0.000	0.000	0.000	120	584	12239	12507	2.271	Error	Error	10138	2101	0	0	10502	2005	0	0	0	0
2	21	18	""	"iYPL249C"	10820	16590	120	3535	3601	1901	95	138	262	94	90	0	3398	3401	1989	96	114	115	91	88	0	0	0	0	0	0	0	0	0	0	0	0	0	0	0	0	0	0	0	1.042	1.061	1.063	1.240	1.973	1.012	0.911	0.000	0.000	0.000	0.000	0.000	0.000	0.000	0.000	0.000	0.000	0.000	0.000	0.000	0.000	120	542	6742	6811	0.059	Error	Error	3440	3302	0	0	3506	3305	0	0	0	0
2	22	18	""	"iYPL245W"	11010	16590	120	723	691	269	93	99	62	96	95	0	809	751	338	94	100	54	90	88	0	0	0	0	0	0	0	0	0	0	0	0	0	0	0	0	0	0	0	0.881	0.910	0.886	0.947	1.924	0.877	0.874	0.000	0.000	0.000	0.000	0.000	0.000	0.000	0.000	0.000	0.000	0.000	0.000	0.000	0.000	120	620	1345	1255	-0.183	Error	Error	630	715	0	0	598	657	0	0	0	0
2	1	19	""	"iYPR067W"	7020	16780	130	2383	2119	980	96	104	65	96	93	0	983	855	412	97	109	60	87	84	0	0	0	0	0	0	0	0	0	0	0	0	0	0	0	0	0	0	0	2.581	2.669	2.639	2.773	1.655	2.663	0.887	0.000	0.000	0.000	0.000	0.000	0.000	0.000	0.000	0.000	0.000	0.000	0.000	0.000	0.000	120	631	3173	2781	1.368	Error	Error	2287	886	0	0	2023	758	0	0	0	0
2	2	19	""	"iYPR071W"	7200	16770	130	1535	1440	579	89	96	45	97	95	0	2427	2236	965	94	107	120	94	92	0	0	0	0	0	0	0	0	0	0	0	0	0	0	0	0	0	0	0	0.620	0.631	0.621	0.654	1.858	0.600	0.874	0.000	0.000	0.000	0.000	0.000	0.000	0.000	0.000	0.000	0.000	0.000	0.000	0.000	0.000	120	533	3779	3493	-0.690	Error	Error	1446	2333	0	0	1351	2142	0	0	0	0
2	3	19	""	"iYPR074C"	7390	16770	130	1055	1052	494	85	91	41	93	90	0	2916	2704	1343	92	108	123	89	89	0	0	0	0	0	0	0	0	0	0	0	0	0	0	0	0	0	0	0	0.343	0.370	0.385	0.396	1.960	0.344	0.864	0.000	0.000	0.000	0.000	0.000	0.000	0.000	0.000	0.000	0.000	0.000	0.000	0.000	0.000	120	493	3794	3579	-1.542	Error	Error	970	2824	0	0	967	2612	0	0	0	0
2	4	19	""	"iYPR094W"	7570	16770	130	592	557	178	87	103	108	95	89	0	792	737	260	92	129	183	90	86	0	0	0	0	0	0	0	0	0	0	0	0	0	0	0	0	0	0	0	0.721	0.729	0.712	0.724	1.525	0.653	0.789	0.000	0.000	0.000	0.000	0.000	0.000	0.000	0.000	0.000	0.000	0.000	0.000	0.000	0.000	120	496	1205	1115	-0.471	Error	Error	505	700	0	0	470	645	0	0	0	0
2	5	19	""	"iYPR098C"	7770	16780	140	2270	2087	809	90	107	106	96	95	0	1947	1786	748	93	124	142	92	89	0	0	0	0	0	0	0	0	0	0	0	0	0	0	0	0	0	0	0	1.176	1.180	1.185	1.259	1.675	1.172	0.899	0.000	0.000	0.000	0.000	0.000	0.000	0.000	0.000	0.000	0.000	0.000	0.000	0.000	0.000	156	526	4034	3690	0.234	Error	Error	2180	1854	0	0	1997	1693	0	0	0	0
2	6	19	""	"iYPR103W"	7970	16770	130	5770	5404	2306	93	105	58	100	100	0	1977	1748	757	96	111	63	92	92	0	0	0	0	0	0	0	0	0	0	0	0	0	0	0	0	0	0	0	3.018	3.215	3.290	3.517	1.846	3.313	0.897	0.000	0.000	0.000	0.000	0.000	0.000	0.000	0.000	0.000	0.000	0.000	0.000	0.000	0.000	120	471	7558	6963	1.594	Error	Error	5677	1881	0	0	5311	1652	0	0	0	0
2	7	19	""	"iYPRWsigma2-0"	8150	16770	130	3787	3364	1293	96	126	191	95	95	0	3423	3105	1380	97	153	339	92	90	0	0	0	0	0	0	0	0	0	0	0	0	0	0	0	0	0	0	0	1.110	1.086	1.103	1.184	1.605	1.035	0.920	0.000	0.000	0.000	0.000	0.000	0.000	0.000	0.000	0.000	0.000	0.000	0.000	0.000	0.000	120	517	7017	6276	0.150	Error	Error	3691	3326	0	0	3268	3008	0	0	0	0
2	8	19	""	"itC(GCA)P2"	8360	16780	130	1170	1072	446	89	122	197	92	85	0	1364	1244	573	94	151	353	85	79	0	0	0	0	0	0	0	0	0	0	0	0	0	0	0	0	0	0	0	0.851	0.855	0.872	0.846	1.501	0.780	0.864	0.000	0.000	0.000	0.000	0.000	0.000	0.000	0.000	0.000	0.000	0.000	0.000	0.000	0.000	120	473	2351	2133	-0.232	Error	Error	1081	1270	0	0	983	1150	0	0	0	0
2	9	19	""	"iYPR121W-0"	8530	16770	130	2318	2229	720	92	126	279	98	96	0	3159	2931	985	96	117	114	97	97	0	0	0	0	0	0	0	0	0	0	0	0	0	0	0	0	0	0	0	0.727	0.754	0.741	0.788	1.449	0.726	0.897	0.000	0.000	0.000	0.000	0.000	0.000	0.000	0.000	0.000	0.000	0.000	0.000	0.000	0.000	120	465	5289	4972	-0.460	Error	Error	2226	3063	0	0	2137	2835	0	0	0	0
2	10	19	""	"itN(GUU)P"	8700	16770	110	4219	3352	1863	94	113	77	97	93	0	1380	1135	662	98	112	65	81	81	0	0	0	0	0	0	0	0	0	0	0	0	0	0	0	0	0	0	0	3.218	3.142	3.247	3.809	2.281	3.138	0.899	0.000	0.000	0.000	0.000	0.000	0.000	0.000	0.000	0.000	0.000	0.000	0.000	0.000	0.000	80	442	5407	4295	1.686	Error	Error	4125	1282	0	0	3258	1037	0	0	0	0
2	11	19	""	"iYPR141C"	8890	16760	90	445	504	390	94	376	2263	1	0	0	919	1468	4186	109	1087	7056	1	1	0	0	0	0	0	0	0	0	0	0	0	0	0	0	0	0	0	0	0	0.433	0.302	0.454	0.432	1.518	0.428	0.680	0.000	0.000	0.000	0.000	0.000	0.000	0.000	0.000	0.000	0.000	0.000	0.000	0.000	0.000	52	400	1161	1769	-1.206	Error	Error	351	810	0	0	410	1359	0	0	-100	0
2	12	19	""	"iSNR45"	9130	16780	90	445	617	585	79	87	39	82	76	0	1019	1888	1950	96	111	65	78	73	0	0	0	0	0	0	0	0	0	0	0	0	0	0	0	0	0	0	0	0.397	0.300	0.315	0.352	2.243	0.272	0.800	0.000	0.000	0.000	0.000	0.000	0.000	0.000	0.000	0.000	0.000	0.000	0.000	0.000	0.000	52	355	1289	2330	-1.334	Error	Error	366	923	0	0	538	1792	0	0	0	0
2	13	19	""	"iYAL064C-A-3"	9300	16770	120	321	303	136	83	101	140	71	34	0	560	494	250	86	106	147	78	73	0	0	0	0	0	0	0	0	0	0	0	0	0	0	0	0	0	0	0	0.502	0.539	0.515	0.538	1.885	0.525	0.792	0.000	0.000	0.000	0.000	0.000	0.000	0.000	0.000	0.000	0.000	0.000	0.000	0.000	0.000	120	496	712	628	-0.994	Error	Error	238	474	0	0	220	408	0	0	0	0
2	14	19	""	"iYBLWdelta3"	9480	16780	120	1177	1065	550	87	92	74	90	86	0	638	561	319	90	105	182	75	66	0	0	0	0	0	0	0	0	0	0	0	0	0	0	0	0	0	0	0	1.989	2.076	2.134	2.327	2.357	2.021	0.848	0.000	0.000	0.000	0.000	0.000	0.000	0.000	0.000	0.000	0.000	0.000	0.000	0.000	0.000	120	470	1638	1449	0.992	Error	Error	1090	548	0	0	978	471	0	0	0	0
2	15	19	""	"YBLCdelta7"	9680	16780	120	831	800	350	81	88	35	97	96	0	1325	1217	557	91	95	55	99	97	0	0	0	0	0	0	0	0	0	0	0	0	0	0	0	0	0	0	0	0.608	0.639	0.647	0.637	1.610	0.625	0.879	0.000	0.000	0.000	0.000	0.000	0.000	0.000	0.000	0.000	0.000	0.000	0.000	0.000	0.000	120	479	1984	1845	-0.718	Error	Error	750	1234	0	0	719	1126	0	0	0	0
2	16	19	""	"itE(UUC)C"	9870	16780	120	493	466	220	84	91	41	88	85	0	565	495	251	89	94	53	82	79	0	0	0	0	0	0	0	0	0	0	0	0	0	0	0	0	0	0	0	0.859	0.941	0.909	1.040	2.051	0.872	0.771	0.000	0.000	0.000	0.000	0.000	0.000	0.000	0.000	0.000	0.000	0.000	0.000	0.000	0.000	120	441	885	788	-0.219	Error	Error	409	476	0	0	382	406	0	0	0	0
2	17	19	""	"itL(CAA)C"	10050	16780	130	4955	4191	2044	87	92	42	96	95	0	2590	2126	1133	89	95	33	89	87	0	0	0	0	0	0	0	0	0	0	0	0	0	0	0	0	0	0	0	1.946	2.015	1.944	2.207	1.859	1.988	0.890	0.000	0.000	0.000	0.000	0.000	0.000	0.000	0.000	0.000	0.000	0.000	0.000	0.000	0.000	120	492	7369	6141	0.961	Error	Error	4868	2501	0	0	4104	2037	0	0	0	0
2	18	19	""	"iYCL014W"	10250	16780	120	2865	2395	1284	89	95	44	92	89	0	832	707	392	91	98	37	79	79	0	0	0	0	0	0	0	0	0	0	0	0	0	0	0	0	0	0	0	3.746	3.744	3.620	3.429	1.775	3.716	0.877	0.000	0.000	0.000	0.000	0.000	0.000	0.000	0.000	0.000	0.000	0.000	0.000	0.000	0.000	120	470	3517	2922	1.905	Error	Error	2776	741	0	0	2306	616	0	0	0	0
2	19	19	""	"iYCR002C"	10430	16780	130	1899	1669	669	90	98	45	97	93	0	1317	1131	506	93	100	38	90	90	0	0	0	0	0	0	0	0	0	0	0	0	0	0	0	0	0	0	0	1.478	1.521	1.488	1.573	1.764	1.503	0.896	0.000	0.000	0.000	0.000	0.000	0.000	0.000	0.000	0.000	0.000	0.000	0.000	0.000	0.000	120	502	3033	2617	0.564	Error	Error	1809	1224	0	0	1579	1038	0	0	0	0
2	20	19	""	"iYCR006C"	10630	16780	130	2248	2022	936	91	118	210	92	87	0	1942	1714	807	95	105	66	90	89	0	0	0	0	0	0	0	0	0	0	0	0	0	0	0	0	0	0	0	1.168	1.193	1.200	1.301	1.766	1.178	0.903	0.000	0.000	0.000	0.000	0.000	0.000	0.000	0.000	0.000	0.000	0.000	0.000	0.000	0.000	120	522	4004	3550	0.224	Error	Error	2157	1847	0	0	1931	1619	0	0	0	0
2	21	19	""	"iYCRCdelta6-A"	10820	16780	130	2116	2209	1165	90	93	33	100	99	0	2418	2213	1254	90	95	28	96	95	0	0	0	0	0	0	0	0	0	0	0	0	0	0	0	0	0	0	0	0.870	0.998	0.988	1.156	1.884	0.972	0.911	0.000	0.000	0.000	0.000	0.000	0.000	0.000	0.000	0.000	0.000	0.000	0.000	0.000	0.000	120	525	4354	4242	-0.200	Error	Error	2026	2328	0	0	2119	2123	0	0	0	0
2	22	19	""	"YCRCtau1"	11020	16790	110	173	183	88	88	92	35	76	61	0	228	230	105	91	96	28	82	81	0	0	0	0	0	0	0	0	0	0	0	0	0	0	0	0	0	0	0	0.620	0.683	0.659	0.725	2.132	0.752	0.466	0.000	0.000	0.000	0.000	0.000	0.000	0.000	0.000	0.000	0.000	0.000	0.000	0.000	0.000	80	481	222	234	-0.689	Error	Error	85	137	0	0	95	139	0	0	0	0
2	1	20	""	"SNR189"	7010	16960	130	241	250	132	88	92	37	79	73	0	620	581	326	93	100	37	81	80	0	0	0	0	0	0	0	0	0	0	0	0	0	0	0	0	0	0	0	0.290	0.332	0.317	0.325	2.346	0.311	0.656	0.000	0.000	0.000	0.000	0.000	0.000	0.000	0.000	0.000	0.000	0.000	0.000	0.000	0.000	120	746	680	650	-1.784	Error	Error	153	527	0	0	162	488	0	0	0	0
2	2	20	""	"YCRWomega3"	7210	16970	120	4185	3856	1766	86	90	35	99	99	0	2343	2114	1013	90	94	27	94	94	0	0	0	0	0	0	0	0	0	0	0	0	0	0	0	0	0	0	0	1.819	1.863	1.823	1.957	1.631	1.896	0.877	0.000	0.000	0.000	0.000	0.000	0.000	0.000	0.000	0.000	0.000	0.000	0.000	0.000	0.000	120	544	6352	5794	0.863	Error	Error	4099	2253	0	0	3770	2024	0	0	0	0
2	3	20	"EMPTY"	"EMPTY"	7370	16960	150	89	95	40	84	88	36	20	6	0	91	97	41	90	99	95	2	0	0	0	0	0	0	0	0	0	0	0	0	0	0	0	0	0	0	0	0	5.000	1.571	1.600	1.322	4.177	1.890	0.037	0.000	0.000	0.000	0.000	0.000	0.000	0.000	0.000	0.000	0.000	0.000	0.000	0.000	0.000	156	708	6	18	2.322	Error	Error	5	1	0	0	11	7	0	0	-75	0
2	4	20	"EMPTY"	"EMPTY"	7560	16960	150	83	88	37	83	91	52	7	1	0	90	94	29	90	110	128	0	0	0	0	0	0	0	0	0	0	0	0	0	0	0	0	0	0	0	0	0	0.000	1.250	1.442	1.239	3.824	2.743	0.041	0.000	0.000	0.000	0.000	0.000	0.000	0.000	0.000	0.000	0.000	0.000	0.000	0.000	0.000	156	710	0	9	Error	Error	Error	0	0	0	0	5	4	0	0	-75	0
2	5	20	"EMPTY"	"EMPTY"	7750	16960	150	84	90	38	82	93	54	8	1	0	94	99	30	92	107	93	1	0	0	0	0	0	0	0	0	0	0	0	0	0	0	0	0	0	0	0	0	1.000	1.143	1.333	1.437	3.438	0.949	0.125	0.000	0.000	0.000	0.000	0.000	0.000	0.000	0.000	0.000	0.000	0.000	0.000	0.000	0.000	156	717	4	15	0.000	Error	Error	2	2	0	0	8	7	0	0	-75	0
2	6	20	"EMPTY"	"EMPTY"	7950	16960	150	81	85	34	86	95	48	8	1	0	93	100	35	89	123	615	0	0	0	0	0	0	0	0	0	0	0	0	0	0	0	0	0	0	0	0	0	-1.250	-0.091	1.143	1.425	3.628	0.990	0.061	0.000	0.000	0.000	0.000	0.000	0.000	0.000	0.000	0.000	0.000	0.000	0.000	0.000	0.000	156	723	-1	10	Error	Error	Error	-5	4	0	0	-1	11	0	0	-75	0
2	7	20	"EMPTY"	"EMPTY"	8140	16960	150	90	101	81	85	110	160	2	0	0	92	117	186	91	150	665	1	0	0	0	0	0	0	0	0	0	0	0	0	0	0	0	0	0	0	0	0	5.000	0.615	1.428	1.495	3.784	0.014	0.013	0.000	0.000	0.000	0.000	0.000	0.000	0.000	0.000	0.000	0.000	0.000	0.000	0.000	0.000	156	728	6	42	2.322	Error	Error	5	1	0	0	16	26	0	0	-75	0
2	8	20	"EMPTY"	"EMPTY"	8330	16960	150	81	85	31	84	103	154	0	0	0	89	93	33	90	143	664	0	0	0	0	0	0	0	0	0	0	0	0	0	0	0	0	0	0	0	0	0	3.000	0.333	1.130	1.076	3.532	1.800	0.041	0.000	0.000	0.000	0.000	0.000	0.000	0.000	0.000	0.000	0.000	0.000	0.000	0.000	0.000	156	717	-4	4	1.585	Error	Error	-3	-1	0	0	1	3	0	0	-75	0
2	9	20	"EMPTY"	"EMPTY"	8520	16960	150	83	85	31	82	87	37	12	1	0	89	94	30	89	96	40	10	2	0	0	0	0	0	0	0	0	0	0	0	0	0	0	0	0	0	0	0	100000.000	0.600	1.000	1.240	4.703	0.868	0.136	0.000	0.000	0.000	0.000	0.000	0.000	0.000	0.000	0.000	0.000	0.000	0.000	0.000	0.000	156	698	1	8	16.610	Error	Error	1	0	0	0	3	5	0	0	-75	0
2	10	20	"EMPTY"	"EMPTY"	8710	16960	150	81	88	34	82	93	56	5	1	0	89	93	30	89	97	42	11	1	0	0	0	0	0	0	0	0	0	0	0	0	0	0	0	0	0	0	0	100000.000	1.500	1.231	1.316	4.212	2.114	0.171	0.000	0.000	0.000	0.000	0.000	0.000	0.000	0.000	0.000	0.000	0.000	0.000	0.000	0.000	156	770	-1	10	16.610	Error	Error	-1	0	0	0	6	4	0	0	-75	0
2	11	20	"EMPTY"	"EMPTY"	8900	16960	150	80	81	28	83	222	1570	0	0	0	93	97	30	92	565	4898	0	0	0	0	0	0	0	0	0	0	0	0	0	0	0	0	0	0	0	0	0	-3.000	-0.400	1.188	1.243	4.485	0.927	0.237	0.000	0.000	0.000	0.000	0.000	0.000	0.000	0.000	0.000	0.000	0.000	0.000	0.000	0.000	156	838	-2	3	Error	Error	Error	-3	1	0	0	-2	5	0	0	-75	0
2	12	20	"EMPTY"	"EMPTY"	9090	16960	150	81	85	32	84	162	1083	0	0	0	92	97	26	90	367	3555	0	0	0	0	0	0	0	0	0	0	0	0	0	0	0	0	0	0	0	0	0	-1.500	0.143	0.991	0.961	3.071	0.508	0.115	0.000	0.000	0.000	0.000	0.000	0.000	0.000	0.000	0.000	0.000	0.000	0.000	0.000	0.000	156	816	-1	8	Error	Error	Error	-3	2	0	0	1	7	0	0	-75	0
2	13	20	"EMPTY"	"EMPTY"	9280	16960	150	82	83	30	82	84	31	15	3	0	86	89	27	85	90	29	12	5	0	0	0	0	0	0	0	0	0	0	0	0	0	0	0	0	0	0	0	0.000	0.250	1.308	1.266	3.271	3.424	0.005	0.000	0.000	0.000	0.000	0.000	0.000	0.000	0.000	0.000	0.000	0.000	0.000	0.000	0.000	156	718	1	5	Error	Error	Error	0	1	0	0	1	4	0	0	-75	0
2	14	20	"EMPTY"	"EMPTY"	9470	16960	150	86	89	34	81	84	30	18	8	0	88	94	41	86	90	27	16	5	0	0	0	0	0	0	0	0	0	0	0	0	0	0	0	0	0	0	0	2.500	1.000	1.313	1.273	5.027	1.460	0.006	0.000	0.000	0.000	0.000	0.000	0.000	0.000	0.000	0.000	0.000	0.000	0.000	0.000	0.000	156	705	7	16	1.322	Error	Error	5	2	0	0	8	8	0	0	-75	0
2	15	20	"EMPTY"	"EMPTY"	9660	16960	150	84	86	32	86	111	95	0	0	0	90	94	26	92	134	161	0	0	0	0	0	0	0	0	0	0	0	0	0	0	0	0	0	0	0	0	0	1.000	0.000	1.279	1.385	3.311	5.081	0.009	0.000	0.000	0.000	0.000	0.000	0.000	0.000	0.000	0.000	0.000	0.000	0.000	0.000	0.000	156	706	-4	2	0.000	Error	Error	-2	-2	0	0	0	2	0	0	-75	0
2	16	20	"EMPTY"	"EMPTY"	9850	16960	150	83	84	32	89	113	94	0	0	0	91	94	26	93	141	177	0	0	0	0	0	0	0	0	0	0	0	0	0	0	0	0	0	0	0	0	0	3.000	-5.000	1.600	1.638	3.691	0.559	0.203	0.000	0.000	0.000	0.000	0.000	0.000	0.000	0.000	0.000	0.000	0.000	0.000	0.000	0.000	156	706	-8	-4	1.585	Error	Error	-6	-2	0	0	-5	1	0	0	-75	0
2	17	20	"EMPTY"	"EMPTY"	10050	16960	150	80	84	33	87	91	42	9	1	0	90	93	25	91	100	52	3	0	0	0	0	0	0	0	0	0	0	0	0	0	0	0	0	0	0	0	0	7.000	-1.500	1.333	1.252	3.328	676.163	0.002	0.000	0.000	0.000	0.000	0.000	0.000	0.000	0.000	0.000	0.000	0.000	0.000	0.000	0.000	156	714	-8	-1	2.807	Error	Error	-7	-1	0	0	-3	2	0	0	-75	0
2	18	20	"EMPTY"	"EMPTY"	10240	16960	150	76	84	34	81	88	39	11	4	0	91	99	82	91	96	32	8	1	0	0	0	0	0	0	0	0	0	0	0	0	0	0	0	0	0	0	0	100000.000	0.375	1.321	1.407	3.294	0.088	0.004	0.000	0.000	0.000	0.000	0.000	0.000	0.000	0.000	0.000	0.000	0.000	0.000	0.000	0.000	156	697	-5	11	16.610	Error	Error	-5	0	0	0	3	8	0	0	-75	0
2	19	20	"EMPTY"	"EMPTY"	10430	16960	150	80	86	33	81	88	36	16	1	0	86	87	23	91	95	30	8	0	0	0	0	0	0	0	0	0	0	0	0	0	0	0	0	0	0	0	0	0.200	-1.250	1.342	1.207	3.446	16.928	0.001	0.000	0.000	0.000	0.000	0.000	0.000	0.000	0.000	0.000	0.000	0.000	0.000	0.000	0.000	156	696	-6	1	-2.322	Error	Error	-1	-5	0	0	5	-4	0	0	-75	0
2	20	20	"EMPTY"	"EMPTY"	10620	16960	150	93	96	34	82	86	35	19	5	0	88	95	39	90	95	31	16	4	0	0	0	0	0	0	0	0	0	0	0	0	0	0	0	0	0	0	0	-5.500	2.800	1.209	1.174	3.522	1.567	0.047	0.000	0.000	0.000	0.000	0.000	0.000	0.000	0.000	0.000	0.000	0.000	0.000	0.000	0.000	156	706	9	19	Error	Error	Error	11	-2	0	0	14	5	0	0	-75	0
2	21	20	"EMPTY"	"EMPTY"	10810	16960	150	83	87	28	85	88	34	12	2	0	86	91	30	89	93	27	14	3	0	0	0	0	0	0	0	0	0	0	0	0	0	0	0	0	0	0	0	0.667	1.000	1.000	1.000	4.726	2.451	0.007	0.000	0.000	0.000	0.000	0.000	0.000	0.000	0.000	0.000	0.000	0.000	0.000	0.000	0.000	156	710	-5	4	-0.585	Error	Error	-2	-3	0	0	2	2	0	0	-75	0
2	22	20	"EMPTY"	"EMPTY"	11000	16960	150	80	83	28	82	86	36	12	0	0	83	89	24	89	95	38	4	0	0	0	0	0	0	0	0	0	0	0	0	0	0	0	0	0	0	0	0	0.333	100000.000	1.000	0.910	2.961	6.482	0.003	0.000	0.000	0.000	0.000	0.000	0.000	0.000	0.000	0.000	0.000	0.000	0.000	0.000	0.000	156	916	-8	1	-1.585	Error	Error	-2	-6	0	0	1	0	0	0	-75	0
3	1	1	""	"YBL083C"	11490	13300	120	1793	1600	757	95	99	37	98	97	0	4705	4012	2248	103	108	34	92	90	0	0	0	0	0	0	0	0	0	0	0	0	0	0	0	0	0	0	0	0.369	0.385	0.398	0.512	2.413	0.346	0.856	0.000	0.000	0.000	0.000	0.000	0.000	0.000	0.000	0.000	0.000	0.000	0.000	0.000	0.000	120	617	6300	5414	-1.438	Error	Error	1698	4602	0	0	1505	3909	0	0	0	0
3	2	1	""	"YBL112C"	11670	13300	120	11161	10436	5798	96	102	43	100	100	0	16136	15334	8922	107	116	43	99	98	0	0	0	0	0	0	0	0	0	0	0	0	0	0	0	0	0	0	0	0.690	0.679	0.686	0.757	1.963	0.657	0.912	0.000	0.000	0.000	0.000	0.000	0.000	0.000	0.000	0.000	0.000	0.000	0.000	0.000	0.000	120	532	27094	25567	-0.535	Error	Error	11065	16029	0	0	10340	15227	0	0	0	0
3	3	1	"CDS1"	"YBR029C"	11850	13300	120	571	597	371	94	100	40	89	84	0	1206	1285	916	103	111	37	87	85	0	0	0	0	0	0	0	0	0	0	0	0	0	0	0	0	0	0	0	0.432	0.426	0.429	0.443	1.924	0.368	0.783	0.000	0.000	0.000	0.000	0.000	0.000	0.000	0.000	0.000	0.000	0.000	0.000	0.000	0.000	120	527	1580	1685	-1.209	Error	Error	477	1103	0	0	503	1182	0	0	0	0
3	4	1	"BOI1"	"YBL085W"	12030	13300	130	190	192	71	91	97	37	77	63	0	183	183	81	99	103	30	75	65	0	0	0	0	0	0	0	0	0	0	0	0	0	0	0	0	0	0	0	1.179	1.202	1.008	1.050	2.311	1.098	0.406	0.000	0.000	0.000	0.000	0.000	0.000	0.000	0.000	0.000	0.000	0.000	0.000	0.000	0.000	120	587	183	185	0.237	Error	Error	99	84	0	0	101	84	0	0	0	0
3	5	1	"NTH2"	"YBR001C"	12210	13310	130	9142	9304	6170	94	99	36	100	100	0	2558	2498	1837	99	103	30	87	80	0	0	0	0	0	0	0	0	0	0	0	0	0	0	0	0	0	0	0	3.680	3.839	3.882	4.492	2.075	3.728	0.861	0.000	0.000	0.000	0.000	0.000	0.000	0.000	0.000	0.000	0.000	0.000	0.000	0.000	0.000	120	612	11507	11609	1.880	Error	Error	9048	2459	0	0	9210	2399	0	0	0	0
3	6	1	"RPL4A"	"YBR031W"	12410	13300	120	3067	2976	1695	94	98	36	100	98	0	2677	2795	1753	95	99	30	94	92	0	0	0	0	0	0	0	0	0	0	0	0	0	0	0	0	0	0	0	1.151	1.067	1.052	1.206	2.137	1.057	0.838	0.000	0.000	0.000	0.000	0.000	0.000	0.000	0.000	0.000	0.000	0.000	0.000	0.000	0.000	120	600	5555	5582	0.203	Error	Error	2973	2582	0	0	2882	2700	0	0	0	0
3	7	1	"RPL23A"	"YBL087C"	12610	13300	120	2188	2146	1103	95	104	49	95	92	0	3541	3571	2100	95	103	42	94	93	0	0	0	0	0	0	0	0	0	0	0	0	0	0	0	0	0	0	0	0.607	0.590	0.578	0.653	1.947	0.528	0.841	0.000	0.000	0.000	0.000	0.000	0.000	0.000	0.000	0.000	0.000	0.000	0.000	0.000	0.000	120	531	5539	5527	-0.719	Error	Error	2093	3446	0	0	2051	3476	0	0	0	0
3	8	1	"COQ1"	"YBR003W"	12770	13300	120	15607	13956	5324	105	116	71	100	100	0	7087	5925	2856	100	117	77	95	92	0	0	0	0	0	0	0	0	0	0	0	0	0	0	0	0	0	0	0	2.219	2.378	2.311	2.887	2.183	2.289	0.897	0.000	0.000	0.000	0.000	0.000	0.000	0.000	0.000	0.000	0.000	0.000	0.000	0.000	0.000	120	537	22489	19676	1.150	Error	Error	15502	6987	0	0	13851	5825	0	0	0	0
3	9	1	""	"YBR033W"	12970	13310	130	6237	6604	3370	101	111	64	100	100	0	3124	3227	1778	100	110	44	96	95	0	0	0	0	0	0	0	0	0	0	0	0	0	0	0	0	0	0	0	2.029	2.080	2.126	2.348	2.217	2.220	0.778	0.000	0.000	0.000	0.000	0.000	0.000	0.000	0.000	0.000	0.000	0.000	0.000	0.000	0.000	120	603	9160	9630	1.021	Error	Error	6136	3024	0	0	6503	3127	0	0	0	0
3	10	1	""	"YBL089W"	13140	13310	120	8339	7668	3128	105	109	43	100	100	0	2610	2531	1211	103	109	36	96	96	0	0	0	0	0	0	0	0	0	0	0	0	0	0	0	0	0	0	0	3.284	3.115	3.204	3.274	1.643	3.084	0.822	0.000	0.000	0.000	0.000	0.000	0.000	0.000	0.000	0.000	0.000	0.000	0.000	0.000	0.000	120	517	10741	9991	1.716	Error	Error	8234	2507	0	0	7563	2428	0	0	0	0
3	11	1	""	"YBR005W"	13310	13310	120	5607	5637	2725	104	111	45	100	100	0	2601	2529	1280	105	112	41	95	94	0	0	0	0	0	0	0	0	0	0	0	0	0	0	0	0	0	0	0	2.205	2.283	2.316	2.413	1.659	2.348	0.852	0.000	0.000	0.000	0.000	0.000	0.000	0.000	0.000	0.000	0.000	0.000	0.000	0.000	0.000	120	608	7999	7957	1.141	Error	Error	5503	2496	0	0	5533	2424	0	0	0	0
3	12	1	"PDX3"	"YBR035C"	13540	13320	120	1739	1700	856	104	109	43	95	94	0	4130	4125	2186	105	112	41	95	95	0	0	0	0	0	0	0	0	0	0	0	0	0	0	0	0	0	0	0	0.406	0.397	0.402	0.418	1.865	0.382	0.878	0.000	0.000	0.000	0.000	0.000	0.000	0.000	0.000	0.000	0.000	0.000	0.000	0.000	0.000	120	618	5660	5616	-1.300	Error	Error	1635	4025	0	0	1596	4020	0	0	0	0
3	13	1	""	"YCL047C"	13730	13310	120	8258	7559	3388	101	109	61	99	98	0	4827	4578	2491	100	105	33	92	90	0	0	0	0	0	0	0	0	0	0	0	0	0	0	0	0	0	0	0	1.726	1.665	1.651	2.059	2.350	1.578	0.902	0.000	0.000	0.000	0.000	0.000	0.000	0.000	0.000	0.000	0.000	0.000	0.000	0.000	0.000	120	547	12884	11936	0.787	Error	Error	8157	4727	0	0	7458	4478	0	0	0	0
3	14	1	"RVS161"	"YCR009C"	13900	13310	120	10700	9400	4561	100	110	65	99	98	0	3143	2833	1450	98	103	35	91	90	0	0	0	0	0	0	0	0	0	0	0	0	0	0	0	0	0	0	0	3.481	3.400	3.590	3.704	1.890	3.511	0.868	0.000	0.000	0.000	0.000	0.000	0.000	0.000	0.000	0.000	0.000	0.000	0.000	0.000	0.000	120	561	13645	12035	1.800	Error	Error	10600	3045	0	0	9300	2735	0	0	0	0
3	15	1	"PHO87"	"YCR037C"	14090	13310	120	3594	3838	1901	104	111	51	96	96	0	2000	2141	1246	98	105	39	93	90	0	0	0	0	0	0	0	0	0	0	0	0	0	0	0	0	0	0	0	1.835	1.828	1.833	1.982	1.970	1.838	0.754	0.000	0.000	0.000	0.000	0.000	0.000	0.000	0.000	0.000	0.000	0.000	0.000	0.000	0.000	120	552	5392	5777	0.876	Error	Error	3490	1902	0	0	3734	2043	0	0	0	0
3	16	1	""	"YCL049C"	14260	13310	120	2118	2027	941	100	108	46	95	95	0	2683	2446	1267	100	108	40	90	89	0	0	0	0	0	0	0	0	0	0	0	0	0	0	0	0	0	0	0	0.781	0.821	0.841	0.887	1.954	0.766	0.825	0.000	0.000	0.000	0.000	0.000	0.000	0.000	0.000	0.000	0.000	0.000	0.000	0.000	0.000	120	567	4601	4273	-0.356	Error	Error	2018	2583	0	0	1927	2346	0	0	0	0
3	17	1	"adp1"	"YCR011C"	14460	13310	120	5168	5247	2592	102	108	46	98	98	0	2366	2198	1268	100	108	40	95	94	0	0	0	0	0	0	0	0	0	0	0	0	0	0	0	0	0	0	0	2.236	2.452	2.520	2.718	1.938	2.588	0.757	0.000	0.000	0.000	0.000	0.000	0.000	0.000	0.000	0.000	0.000	0.000	0.000	0.000	0.000	120	552	7332	7243	1.161	Error	Error	5066	2266	0	0	5145	2098	0	0	0	0
3	18	1	"MATAlpha2"	"YCR039C"	14630	13320	120	8647	8580	4309	106	113	48	98	98	0	4928	4532	2662	101	108	37	94	90	0	0	0	0	0	0	0	0	0	0	0	0	0	0	0	0	0	0	0	1.769	1.912	1.914	2.402	2.309	1.868	0.890	0.000	0.000	0.000	0.000	0.000	0.000	0.000	0.000	0.000	0.000	0.000	0.000	0.000	0.000	120	548	13368	12905	0.823	Error	Error	8541	4827	0	0	8474	4431	0	0	0	0
3	19	1	"LRE1"	"YCL051W"	14820	13320	120	6955	6594	2722	105	111	53	99	98	0	3275	2992	1392	103	109	39	90	90	0	0	0	0	0	0	0	0	0	0	0	0	0	0	0	0	0	0	0	2.160	2.246	2.272	2.396	1.947	2.226	0.870	0.000	0.000	0.000	0.000	0.000	0.000	0.000	0.000	0.000	0.000	0.000	0.000	0.000	0.000	120	608	10022	9378	1.111	Error	Error	6850	3172	0	0	6489	2889	0	0	0	0
3	20	1	""	"YCR013C"	15030	13320	120	4457	4131	1851	102	107	44	97	97	0	2216	2061	1016	103	111	70	90	88	0	0	0	0	0	0	0	0	0	0	0	0	0	0	0	0	0	0	0	2.061	2.058	2.081	2.206	1.913	2.117	0.832	0.000	0.000	0.000	0.000	0.000	0.000	0.000	0.000	0.000	0.000	0.000	0.000	0.000	0.000	120	576	6468	5987	1.043	Error	Error	4355	2113	0	0	4029	1958	0	0	0	0
3	21	1	""	"YCR041W"	15200	13320	120	10279	10243	5034	98	108	49	100	99	0	7913	7516	4258	100	110	74	95	94	0	0	0	0	0	0	0	0	0	0	0	0	0	0	0	0	0	0	0	1.303	1.368	1.362	1.660	2.173	1.312	0.912	0.000	0.000	0.000	0.000	0.000	0.000	0.000	0.000	0.000	0.000	0.000	0.000	0.000	0.000	120	541	17994	17561	0.382	Error	Error	10181	7813	0	0	10145	7416	0	0	0	0
3	22	1	"SPB1"	"YCL054W"	15390	13320	120	2920	3502	3152	99	107	47	95	93	0	1729	2043	1888	101	109	43	87	85	0	0	0	0	0	0	0	0	0	0	0	0	0	0	0	0	0	0	0	1.733	1.752	1.730	1.842	2.091	1.778	0.833	0.000	0.000	0.000	0.000	0.000	0.000	0.000	0.000	0.000	0.000	0.000	0.000	0.000	0.000	120	660	4449	5345	0.793	Error	Error	2821	1628	0	0	3403	1942	0	0	0	0
3	1	2	""	"YCR015C"	11420	13510	140	4837	4432	2633	97	100	37	94	92	0	4677	4322	2998	103	108	35	90	88	0	0	0	0	0	0	0	0	0	0	0	0	0	0	0	0	0	0	0	1.036	1.027	1.016	1.223	2.370	0.965	0.849	0.000	0.000	0.000	0.000	0.000	0.000	0.000	0.000	0.000	0.000	0.000	0.000	0.000	0.000	156	616	9314	8554	0.051	Error	Error	4740	4574	0	0	4335	4219	0	0	0	0
3	2	2	""	"YCR043C"	11590	13510	150	975	900	561	100	105	41	85	79	0	2285	1969	1338	107	114	42	78	75	0	0	0	0	0	0	0	0	0	0	0	0	0	0	0	0	0	0	0	0.402	0.430	0.459	0.534	2.786	0.404	0.864	0.000	0.000	0.000	0.000	0.000	0.000	0.000	0.000	0.000	0.000	0.000	0.000	0.000	0.000	156	510	3053	2662	-1.316	Error	Error	875	2178	0	0	800	1862	0	0	0	0
3	3	2	""	"YDR003W"	11780	13510	150	4202	3403	2119	103	110	45	92	87	0	2551	2185	1424	106	114	43	82	77	0	0	0	0	0	0	0	0	0	0	0	0	0	0	0	0	0	0	0	1.676	1.587	1.598	1.726	2.454	1.602	0.865	0.000	0.000	0.000	0.000	0.000	0.000	0.000	0.000	0.000	0.000	0.000	0.000	0.000	0.000	156	540	6544	5379	0.745	Error	Error	4099	2445	0	0	3300	2079	0	0	0	0
3	4	2	""	"YDR034C-A"	11960	13510	140	14871	11287	7146	101	108	46	96	94	0	7988	6034	4117	104	110	38	86	84	0	0	0	0	0	0	0	0	0	0	0	0	0	0	0	0	0	0	0	1.873	1.886	1.898	2.350	2.583	1.868	0.918	0.000	0.000	0.000	0.000	0.000	0.000	0.000	0.000	0.000	0.000	0.000	0.000	0.000	0.000	156	512	22654	17116	0.906	Error	Error	14770	7884	0	0	11186	5930	0	0	0	0
3	5	2	""	"YDR063W"	12150	13510	150	321	342	179	99	105	42	85	75	0	355	351	198	102	109	39	76	73	0	0	0	0	0	0	0	0	0	0	0	0	0	0	0	0	0	0	0	0.877	0.976	0.912	0.989	2.083	0.956	0.597	0.000	0.000	0.000	0.000	0.000	0.000	0.000	0.000	0.000	0.000	0.000	0.000	0.000	0.000	156	617	475	492	-0.189	Error	Error	222	253	0	0	243	249	0	0	0	0
3	6	2	"MAF1"	"YDR005C"	12340	13510	150	4540	4668	3532	98	102	36	95	91	0	1227	1202	991	100	105	35	73	71	0	0	0	0	0	0	0	0	0	0	0	0	0	0	0	0	0	0	0	3.941	4.147	3.979	4.373	2.084	3.998	0.857	0.000	0.000	0.000	0.000	0.000	0.000	0.000	0.000	0.000	0.000	0.000	0.000	0.000	0.000	156	579	5569	5672	1.979	Error	Error	4442	1127	0	0	4570	1102	0	0	0	0
3	7	2	""	"YDR034C-D"	12540	13510	140	14192	13117	8719	100	108	42	96	95	0	7177	6429	4440	99	106	54	90	83	0	0	0	0	0	0	0	0	0	0	0	0	0	0	0	0	0	0	0	1.991	2.056	2.127	2.412	2.390	2.082	0.904	0.000	0.000	0.000	0.000	0.000	0.000	0.000	0.000	0.000	0.000	0.000	0.000	0.000	0.000	156	555	21170	19347	0.993	Error	Error	14092	7078	0	0	13017	6330	0	0	0	0
3	8	2	""	"YDR065W"	12730	13510	140	10308	9386	4871	108	113	48	96	95	0	5459	4803	2868	99	107	36	94	91	0	0	0	0	0	0	0	0	0	0	0	0	0	0	0	0	0	0	0	1.903	1.972	1.965	2.278	1.982	1.911	0.897	0.000	0.000	0.000	0.000	0.000	0.000	0.000	0.000	0.000	0.000	0.000	0.000	0.000	0.000	156	528	15560	13982	0.928	Error	Error	10200	5360	0	0	9278	4704	0	0	0	0
3	9	2	"trp1"	"YDR007W"	12920	13510	140	1988	1817	1386	105	136	284	75	70	0	2604	2390	2074	99	108	42	75	70	0	0	0	0	0	0	0	0	0	0	0	0	0	0	0	0	0	0	0	0.752	0.747	0.725	0.949	2.772	0.693	0.811	0.000	0.000	0.000	0.000	0.000	0.000	0.000	0.000	0.000	0.000	0.000	0.000	0.000	0.000	156	578	4388	4003	-0.412	Error	Error	1883	2505	0	0	1712	2291	0	0	0	0
3	10	2	"ARO3"	"YDR035W"	13100	13510	130	5576	5147	4127	105	182	445	77	75	0	5379	4833	3866	105	161	494	72	70	0	0	0	0	0	0	0	0	0	0	0	0	0	0	0	0	0	0	0	1.037	1.066	1.100	1.260	2.591	1.068	0.887	0.000	0.000	0.000	0.000	0.000	0.000	0.000	0.000	0.000	0.000	0.000	0.000	0.000	0.000	120	506	10745	9770	0.053	Error	Error	5471	5274	0	0	5042	4728	0	0	0	0
3	11	2	""	"YDR067C"	13280	13510	130	14230	11790	6831	106	118	84	99	97	0	6160	5179	2937	106	117	115	86	84	0	0	0	0	0	0	0	0	0	0	0	0	0	0	0	0	0	0	0	2.333	2.303	2.375	2.564	1.973	2.375	0.904	0.000	0.000	0.000	0.000	0.000	0.000	0.000	0.000	0.000	0.000	0.000	0.000	0.000	0.000	120	535	20178	16757	1.222	Error	Error	14124	6054	0	0	11684	5073	0	0	0	0
3	12	2	"GAL3"	"YDR009W"	13470	13520	150	5950	5234	2819	107	116	58	98	93	0	6853	5641	3259	106	118	110	88	85	0	0	0	0	0	0	0	0	0	0	0	0	0	0	0	0	0	0	0	0.866	0.926	0.960	1.134	2.224	0.906	0.906	0.000	0.000	0.000	0.000	0.000	0.000	0.000	0.000	0.000	0.000	0.000	0.000	0.000	0.000	156	593	12590	10662	-0.208	Error	Error	5843	6747	0	0	5127	5535	0	0	0	0
3	13	2	"KRS1"	"YDR037W"	13660	13520	150	19335	16407	8283	109	115	46	99	98	0	6217	5293	3049	104	112	45	90	86	0	0	0	0	0	0	0	0	0	0	0	0	0	0	0	0	0	0	0	3.145	3.141	3.135	3.573	2.075	3.192	0.868	0.000	0.000	0.000	0.000	0.000	0.000	0.000	0.000	0.000	0.000	0.000	0.000	0.000	0.000	156	546	25339	21487	1.653	Error	Error	19226	6113	0	0	16298	5189	0	0	0	0
3	14	2	"DOA4"	"YDR069C"	13850	13520	150	436	419	253	105	118	109	71	63	0	281	283	184	101	146	436	10	0	0	0	0	0	0	0	0	0	0	0	0	0	0	0	0	0	0	0	0	1.839	1.725	1.478	1.297	2.431	1.654	0.675	0.000	0.000	0.000	0.000	0.000	0.000	0.000	0.000	0.000	0.000	0.000	0.000	0.000	0.000	156	651	511	496	0.879	Error	Error	331	180	0	0	314	182	0	0	0	0
3	15	2	""	"YDR365W-B"	14070	13510	130	15886	15826	8935	107	141	278	95	91	0	10508	10023	5931	101	170	634	89	89	0	0	0	0	0	0	0	0	0	0	0	0	0	0	0	0	0	0	0	1.516	1.584	1.628	1.755	1.745	1.577	0.865	0.000	0.000	0.000	0.000	0.000	0.000	0.000	0.000	0.000	0.000	0.000	0.000	0.000	0.000	120	583	26186	25641	0.600	Error	Error	15779	10407	0	0	15719	9922	0	0	0	0
3	16	2	"NCB2"	"YDR397C"	14250	13510	120	2223	2199	1183	101	114	57	94	92	0	2482	2607	1548	100	107	41	92	90	0	0	0	0	0	0	0	0	0	0	0	0	0	0	0	0	0	0	0	0.891	0.837	0.805	0.912	1.724	0.802	0.893	0.000	0.000	0.000	0.000	0.000	0.000	0.000	0.000	0.000	0.000	0.000	0.000	0.000	0.000	120	466	4504	4605	-0.167	Error	Error	2122	2382	0	0	2098	2507	0	0	0	0
3	17	2	"TIF35"	"YDR429C"	14440	13510	140	5559	5524	3250	102	107	41	97	96	0	4480	4280	2866	103	110	37	87	85	0	0	0	0	0	0	0	0	0	0	0	0	0	0	0	0	0	0	0	1.247	1.298	1.324	1.739	2.584	1.241	0.908	0.000	0.000	0.000	0.000	0.000	0.000	0.000	0.000	0.000	0.000	0.000	0.000	0.000	0.000	156	596	9834	9599	0.318	Error	Error	5457	4377	0	0	5422	4177	0	0	0	0
3	18	2	""	"YDR367W"	14640	13510	120	3201	2723	1423	105	112	57	91	87	0	3557	3038	1720	104	112	41	84	82	0	0	0	0	0	0	0	0	0	0	0	0	0	0	0	0	0	0	0	0.897	0.892	0.903	0.948	1.834	0.861	0.876	0.000	0.000	0.000	0.000	0.000	0.000	0.000	0.000	0.000	0.000	0.000	0.000	0.000	0.000	120	478	6549	5552	-0.157	Error	Error	3096	3453	0	0	2618	2934	0	0	0	0
3	19	2	"HPT1"	"YDR399W"	14830	13510	120	3322	3233	2009	101	110	57	92	88	0	5125	4913	3153	104	113	40	85	85	0	0	0	0	0	0	0	0	0	0	0	0	0	0	0	0	0	0	0	0.642	0.651	0.666	0.780	2.281	0.629	0.892	0.000	0.000	0.000	0.000	0.000	0.000	0.000	0.000	0.000	0.000	0.000	0.000	0.000	0.000	120	523	8242	7941	-0.640	Error	Error	3221	5021	0	0	3132	4809	0	0	0	0
3	20	2	""	"YDR431W"	15040	13510	120	731	661	331	100	106	44	86	83	0	1933	1643	909	103	115	76	83	81	0	0	0	0	0	0	0	0	0	0	0	0	0	0	0	0	0	0	0	0.345	0.364	0.373	0.387	2.154	0.330	0.817	0.000	0.000	0.000	0.000	0.000	0.000	0.000	0.000	0.000	0.000	0.000	0.000	0.000	0.000	120	488	2461	2101	-1.536	Error	Error	631	1830	0	0	561	1540	0	0	0	0
3	21	2	"xrs2"	"YDR369C"	15210	13510	120	9755	9368	5330	101	108	47	99	97	0	8326	7323	4574	103	114	82	90	86	0	0	0	0	0	0	0	0	0	0	0	0	0	0	0	0	0	0	0	1.174	1.284	1.359	1.604	2.400	1.245	0.857	0.000	0.000	0.000	0.000	0.000	0.000	0.000	0.000	0.000	0.000	0.000	0.000	0.000	0.000	120	428	17877	16487	0.231	Error	Error	9654	8223	0	0	9267	7220	0	0	0	0
3	22	2	""	"YDR401W"	15400	13510	120	5932	5774	3103	103	110	46	97	96	0	3115	3222	1893	103	113	54	89	87	0	0	0	0	0	0	0	0	0	0	0	0	0	0	0	0	0	0	0	1.935	1.818	1.835	1.896	1.726	1.743	0.867	0.000	0.000	0.000	0.000	0.000	0.000	0.000	0.000	0.000	0.000	0.000	0.000	0.000	0.000	120	582	8841	8790	0.953	Error	Error	5829	3012	0	0	5671	3119	0	0	0	0
3	1	3	""	"YDR433W"	11450	13710	120	623	753	487	104	122	218	82	59	0	915	1020	668	106	124	193	87	76	0	0	0	0	0	0	0	0	0	0	0	0	0	0	0	0	0	0	0	0.642	0.710	0.717	0.690	1.687	0.704	0.856	0.000	0.000	0.000	0.000	0.000	0.000	0.000	0.000	0.000	0.000	0.000	0.000	0.000	0.000	120	442	1328	1563	-0.640	Error	Error	519	809	0	0	649	914	0	0	0	0
3	2	3	""	"YDR371W"	11590	13710	140	11076	9635	4985	111	213	931	87	85	0	9654	8366	4963	109	157	352	85	84	0	0	0	0	0	0	0	0	0	0	0	0	0	0	0	0	0	0	0	1.149	1.153	1.184	1.468	2.218	1.093	0.922	0.000	0.000	0.000	0.000	0.000	0.000	0.000	0.000	0.000	0.000	0.000	0.000	0.000	0.000	156	483	20510	17781	0.200	Error	Error	10965	9545	0	0	9524	8257	0	0	0	0
3	3	3	"DIT1"	"YDR403W"	11790	13710	140	11193	11205	7613	108	150	248	91	87	0	4178	4074	3111	107	161	438	75	72	0	0	0	0	0	0	0	0	0	0	0	0	0	0	0	0	0	0	0	2.723	2.797	2.778	3.505	2.761	2.692	0.907	0.000	0.000	0.000	0.000	0.000	0.000	0.000	0.000	0.000	0.000	0.000	0.000	0.000	0.000	156	526	15156	15064	1.445	Error	Error	11085	4071	0	0	11097	3967	0	0	0	0
3	4	3	""	"YDR435C"	11980	13710	140	4025	4245	4007	100	107	45	90	84	0	2536	2578	2444	103	109	37	71	69	0	0	0	0	0	0	0	0	0	0	0	0	0	0	0	0	0	0	0	1.613	1.675	1.678	1.810	2.789	1.704	0.881	0.000	0.000	0.000	0.000	0.000	0.000	0.000	0.000	0.000	0.000	0.000	0.000	0.000	0.000	156	625	6358	6620	0.690	Error	Error	3925	2433	0	0	4145	2475	0	0	0	0
3	5	3	"SWI4"	"YER111C"	12260	13690	100	174	184	85	95	101	42	62	46	0	172	177	77	100	108	38	66	45	0	0	0	0	0	0	0	0	0	0	0	0	0	0	0	0	0	0	0	1.097	1.156	1.073	0.894	3.235	1.337	0.164	0.000	0.000	0.000	0.000	0.000	0.000	0.000	0.000	0.000	0.000	0.000	0.000	0.000	0.000	80	440	151	166	0.134	Error	Error	79	72	0	0	89	77	0	0	0	0
3	6	3	""	"YER140W"	12430	13690	110	3264	3229	2395	94	101	49	95	93	0	5089	5182	3991	99	119	172	85	81	0	0	0	0	0	0	0	0	0	0	0	0	0	0	0	0	0	0	0	0.635	0.617	0.615	0.819	2.750	0.574	0.870	0.000	0.000	0.000	0.000	0.000	0.000	0.000	0.000	0.000	0.000	0.000	0.000	0.000	0.000	80	444	8160	8218	-0.655	Error	Error	3170	4990	0	0	3135	5083	0	0	0	0
3	7	3	"rad3"	"YER171W"	12620	13700	120	5952	7154	6624	102	108	51	100	100	0	1908	2198	1926	102	120	164	85	82	0	0	0	0	0	0	0	0	0	0	0	0	0	0	0	0	0	0	0	3.239	3.365	3.424	3.840	2.066	3.607	0.852	0.000	0.000	0.000	0.000	0.000	0.000	0.000	0.000	0.000	0.000	0.000	0.000	0.000	0.000	120	486	7656	9148	1.696	Error	Error	5850	1806	0	0	7052	2096	0	0	0	0
3	8	3	""	"YER113C"	12800	13700	110	3771	3632	2225	101	107	43	97	93	0	6222	5688	4282	100	107	44	92	91	0	0	0	0	0	0	0	0	0	0	0	0	0	0	0	0	0	0	0	0.599	0.632	0.605	0.752	2.432	0.552	0.828	0.000	0.000	0.000	0.000	0.000	0.000	0.000	0.000	0.000	0.000	0.000	0.000	0.000	0.000	80	478	9792	9119	-0.738	Error	Error	3670	6122	0	0	3531	5588	0	0	0	0
3	9	3	"MAG1"	"YER142C"	13000	13700	110	2880	3571	2870	99	175	439	83	80	0	1153	1409	1161	101	180	550	75	47	0	0	0	0	0	0	0	0	0	0	0	0	0	0	0	0	0	0	0	2.644	2.654	2.614	2.636	1.531	2.656	0.903	0.000	0.000	0.000	0.000	0.000	0.000	0.000	0.000	0.000	0.000	0.000	0.000	0.000	0.000	80	522	3833	4780	1.402	Error	Error	2781	1052	0	0	3472	1308	0	0	0	0
3	10	3	"rad24"	"YER173W"	13200	13700	110	2566	3208	2698	100	198	459	87	77	0	4142	4942	4451	103	255	907	78	71	0	0	0	0	0	0	0	0	0	0	0	0	0	0	0	0	0	0	0	0.611	0.642	0.688	0.842	2.461	0.605	0.886	0.000	0.000	0.000	0.000	0.000	0.000	0.000	0.000	0.000	0.000	0.000	0.000	0.000	0.000	80	540	6505	7947	-0.712	Error	Error	2466	4039	0	0	3108	4839	0	0	0	0
3	11	3	"spr6"	"YER115C"	13410	13700	110	1154	1106	535	99	114	99	92	85	0	3835	3357	1730	103	129	193	85	83	0	0	0	0	0	0	0	0	0	0	0	0	0	0	0	0	0	0	0	0.283	0.309	0.310	0.401	2.786	0.290	0.876	0.000	0.000	0.000	0.000	0.000	0.000	0.000	0.000	0.000	0.000	0.000	0.000	0.000	0.000	80	458	4787	4261	-1.823	Error	Error	1055	3732	0	0	1007	3254	0	0	0	0
3	12	3	"UBP5"	"YER144C"	13570	13690	100	4409	5116	4874	101	109	48	97	96	0	2409	2838	2905	103	110	44	86	83	0	0	0	0	0	0	0	0	0	0	0	0	0	0	0	0	0	0	0	1.868	1.834	1.883	2.298	2.185	1.789	0.889	0.000	0.000	0.000	0.000	0.000	0.000	0.000	0.000	0.000	0.000	0.000	0.000	0.000	0.000	80	371	6614	7750	0.902	Error	Error	4308	2306	0	0	5015	2735	0	0	0	0
3	13	3	""	"YER175C"	13750	13700	110	2538	2220	1163	100	108	49	96	92	0	6077	5151	2966	103	138	286	85	82	0	0	0	0	0	0	0	0	0	0	0	0	0	0	0	0	0	0	0	0.408	0.420	0.406	0.472	2.019	0.389	0.904	0.000	0.000	0.000	0.000	0.000	0.000	0.000	0.000	0.000	0.000	0.000	0.000	0.000	0.000	80	453	8412	7168	-1.293	Error	Error	2438	5974	0	0	2120	5048	0	0	0	0
3	14	3	"RPL23B"	"YER117W"	13950	13700	110	4129	4294	3292	106	174	452	77	72	0	4939	5127	4084	105	268	890	68	66	0	0	0	0	0	0	0	0	0	0	0	0	0	0	0	0	0	0	0	0.832	0.834	0.885	1.071	2.689	0.793	0.889	0.000	0.000	0.000	0.000	0.000	0.000	0.000	0.000	0.000	0.000	0.000	0.000	0.000	0.000	80	526	8857	9210	-0.265	Error	Error	4023	4834	0	0	4188	5022	0	0	0	0
3	15	3	"LSM5"	"YER146W"	14160	13700	120	448	461	277	109	181	465	35	4	0	1180	1008	667	106	251	879	60	9	0	0	0	0	0	0	0	0	0	0	0	0	0	0	0	0	0	0	0	0.316	0.390	0.400	0.411	2.192	0.374	0.788	0.000	0.000	0.000	0.000	0.000	0.000	0.000	0.000	0.000	0.000	0.000	0.000	0.000	0.000	120	495	1413	1254	-1.664	Error	Error	339	1074	0	0	352	902	0	0	0	0
3	16	3	"bmh1"	"YER177W"	14330	13710	120	3663	3358	1635	98	107	47	100	98	0	5425	4874	2617	105	113	43	95	93	0	0	0	0	0	0	0	0	0	0	0	0	0	0	0	0	0	0	0	0.670	0.684	0.665	0.808	2.134	0.654	0.921	0.000	0.000	0.000	0.000	0.000	0.000	0.000	0.000	0.000	0.000	0.000	0.000	0.000	0.000	120	478	8885	8029	-0.578	Error	Error	3565	5320	0	0	3260	4769	0	0	0	0
3	17	3	"cup2"	"YGL166W"	14540	13700	130	2533	2513	1686	101	119	178	90	85	0	3980	3957	3019	108	118	82	86	83	0	0	0	0	0	0	0	0	0	0	0	0	0	0	0	0	0	0	0	0.628	0.627	0.627	0.872	2.600	0.566	0.898	0.000	0.000	0.000	0.000	0.000	0.000	0.000	0.000	0.000	0.000	0.000	0.000	0.000	0.000	120	553	6304	6261	-0.671	Error	Error	2432	3872	0	0	2412	3849	0	0	0	0
3	18	3	""	"YGL198W"	14720	13700	120	1303	1291	858	100	134	345	75	67	0	5358	4812	3376	106	125	170	88	85	0	0	0	0	0	0	0	0	0	0	0	0	0	0	0	0	0	0	0	0.229	0.253	0.267	0.314	2.465	0.240	0.885	0.000	0.000	0.000	0.000	0.000	0.000	0.000	0.000	0.000	0.000	0.000	0.000	0.000	0.000	120	496	6455	5897	-2.126	Error	Error	1203	5252	0	0	1191	4706	0	0	0	0
3	19	3	"SAP4"	"YGL229C"	14890	13700	110	7018	7455	4913	106	117	79	98	96	0	6103	6487	4893	103	126	188	90	86	0	0	0	0	0	0	0	0	0	0	0	0	0	0	0	0	0	0	0	1.152	1.151	1.114	1.478	2.265	1.079	0.915	0.000	0.000	0.000	0.000	0.000	0.000	0.000	0.000	0.000	0.000	0.000	0.000	0.000	0.000	80	485	12912	13733	0.204	Error	Error	6912	6000	0	0	7349	6384	0	0	0	0
3	20	3	""	"YGL168W"	15110	13700	140	3533	3050	2080	111	119	56	87	83	0	1692	1422	1083	106	122	100	71	67	0	0	0	0	0	0	0	0	0	0	0	0	0	0	0	0	0	0	0	2.158	2.233	2.247	2.615	2.302	2.165	0.884	0.000	0.000	0.000	0.000	0.000	0.000	0.000	0.000	0.000	0.000	0.000	0.000	0.000	0.000	156	588	5008	4255	1.109	Error	Error	3422	1586	0	0	2939	1316	0	0	0	0
3	21	3	"EMP24"	"YGL200C"	15280	13700	120	2164	1815	968	109	115	48	92	89	0	7137	6246	3772	108	116	44	95	92	0	0	0	0	0	0	0	0	0	0	0	0	0	0	0	0	0	0	0	0.292	0.278	0.286	0.289	2.094	0.256	0.860	0.000	0.000	0.000	0.000	0.000	0.000	0.000	0.000	0.000	0.000	0.000	0.000	0.000	0.000	120	440	9084	7844	-1.774	Error	Error	2055	7029	0	0	1706	6138	0	0	0	0
3	22	3	""	"YGL231C"	15460	13700	110	12283	10855	7938	114	212	723	85	80	0	4752	4135	3217	108	185	531	75	70	0	0	0	0	0	0	0	0	0	0	0	0	0	0	0	0	0	0	0	2.620	2.667	2.693	2.950	2.283	2.586	0.898	0.000	0.000	0.000	0.000	0.000	0.000	0.000	0.000	0.000	0.000	0.000	0.000	0.000	0.000	80	517	16813	14768	1.390	Error	Error	12169	4644	0	0	10741	4027	0	0	0	0
3	1	4	""	"YGL170C"	11460	13890	110	11143	10724	7007	109	255	1055	86	80	0	2829	2789	2049	112	172	394	75	72	0	0	0	0	0	0	0	0	0	0	0	0	0	0	0	0	0	0	0	4.061	3.965	4.048	4.918	2.083	3.835	0.897	0.000	0.000	0.000	0.000	0.000	0.000	0.000	0.000	0.000	0.000	0.000	0.000	0.000	0.000	80	502	13751	13292	2.022	Error	Error	11034	2717	0	0	10615	2677	0	0	0	0
3	2	4	"ARO8"	"YGL202W"	11660	13890	110	13959	12969	7668	120	308	1081	92	83	0	7323	6792	4242	113	240	632	85	80	0	0	0	0	0	0	0	0	0	0	0	0	0	0	0	0	0	0	0	1.919	1.924	1.956	2.399	2.194	1.896	0.898	0.000	0.000	0.000	0.000	0.000	0.000	0.000	0.000	0.000	0.000	0.000	0.000	0.000	0.000	80	515	21049	19528	0.941	Error	Error	13839	7210	0	0	12849	6679	0	0	0	0
3	3	4	"SEC15"	"YGL233W"	11880	13890	110	2909	3371	2321	110	166	298	86	85	0	3743	4359	3388	111	190	514	80	80	0	0	0	0	0	0	0	0	0	0	0	0	0	0	0	0	0	0	0	0.771	0.768	0.796	0.947	2.211	0.728	0.892	0.000	0.000	0.000	0.000	0.000	0.000	0.000	0.000	0.000	0.000	0.000	0.000	0.000	0.000	80	439	6431	7509	-0.376	Error	Error	2799	3632	0	0	3261	4248	0	0	0	0
3	4	4	"NUP49"	"YGL172W"	12040	13890	110	2655	2509	1574	103	116	93	95	88	0	7438	6382	4555	113	145	258	86	83	0	0	0	0	0	0	0	0	0	0	0	0	0	0	0	0	0	0	0	0.348	0.384	0.382	0.448	1.986	0.353	0.898	0.000	0.000	0.000	0.000	0.000	0.000	0.000	0.000	0.000	0.000	0.000	0.000	0.000	0.000	80	475	9877	8675	-1.521	Error	Error	2552	7325	0	0	2406	6269	0	0	0	0
3	5	4	""	"YGL204C"	12250	13890	110	1825	1493	899	101	117	132	81	76	0	1881	1570	1034	108	146	464	70	67	0	0	0	0	0	0	0	0	0	0	0	0	0	0	0	0	0	0	0	0.972	0.952	0.935	0.952	1.736	0.888	0.864	0.000	0.000	0.000	0.000	0.000	0.000	0.000	0.000	0.000	0.000	0.000	0.000	0.000	0.000	80	554	3497	2854	-0.040	Error	Error	1724	1773	0	0	1392	1462	0	0	0	0
3	6	4	""	"YGL235W"	12430	13890	110	1428	1534	1167	94	99	41	86	82	0	2488	2622	2155	102	107	64	78	76	0	0	0	0	0	0	0	0	0	0	0	0	0	0	0	0	0	0	0	0.559	0.571	0.572	0.629	2.338	0.536	0.884	0.000	0.000	0.000	0.000	0.000	0.000	0.000	0.000	0.000	0.000	0.000	0.000	0.000	0.000	80	544	3720	3960	-0.839	Error	Error	1334	2386	0	0	1440	2520	0	0	0	0
3	7	4	"RTT102"	"YGR275W"	12650	13890	120	1888	1712	875	99	105	48	92	87	0	3682	3297	1880	102	110	61	89	88	0	0	0	0	0	0	0	0	0	0	0	0	0	0	0	0	0	0	0	0.500	0.505	0.495	0.537	1.648	0.463	0.898	0.000	0.000	0.000	0.000	0.000	0.000	0.000	0.000	0.000	0.000	0.000	0.000	0.000	0.000	120	616	5369	4808	-1.001	Error	Error	1789	3580	0	0	1613	3195	0	0	0	0
3	8	4	""	"YHL009W-B"	12840	13890	110	361	353	181	98	110	73	83	72	0	275	269	155	102	120	138	56	27	0	0	0	0	0	0	0	0	0	0	0	0	0	0	0	0	0	0	0	1.520	1.527	1.379	1.415	2.305	1.401	0.660	0.000	0.000	0.000	0.000	0.000	0.000	0.000	0.000	0.000	0.000	0.000	0.000	0.000	0.000	80	514	436	422	0.604	Error	Error	263	173	0	0	255	167	0	0	0	0
3	9	4	""	"YHL041W"	13030	13890	110	658	598	369	103	221	585	46	3	0	2458	2229	1626	102	352	1377	68	41	0	0	0	0	0	0	0	0	0	0	0	0	0	0	0	0	0	0	0	0.236	0.233	0.248	0.293	2.475	0.261	0.648	0.000	0.000	0.000	0.000	0.000	0.000	0.000	0.000	0.000	0.000	0.000	0.000	0.000	0.000	80	528	2911	2622	-2.086	Error	Error	555	2356	0	0	495	2127	0	0	0	0
3	10	4	""	"YGR277C"	13220	13890	110	3018	3019	1882	104	228	608	81	77	0	8318	7850	5116	105	363	1428	77	76	0	0	0	0	0	0	0	0	0	0	0	0	0	0	0	0	0	0	0	0.355	0.376	0.359	0.410	2.523	0.361	0.890	0.000	0.000	0.000	0.000	0.000	0.000	0.000	0.000	0.000	0.000	0.000	0.000	0.000	0.000	80	487	11127	10660	-1.495	Error	Error	2914	8213	0	0	2915	7745	0	0	0	0
3	11	4	"PRS3"	"YHL011C"	13380	13880	110	7605	6782	3550	104	111	56	100	98	0	10391	8660	4615	107	118	78	100	93	0	0	0	0	0	0	0	0	0	0	0	0	0	0	0	0	0	0	0	0.729	0.781	0.795	0.874	1.706	0.761	0.919	0.000	0.000	0.000	0.000	0.000	0.000	0.000	0.000	0.000	0.000	0.000	0.000	0.000	0.000	80	507	17785	15231	-0.455	Error	Error	7501	10284	0	0	6678	8553	0	0	0	0
3	12	4	"ECM34"	"YHL043W"	13580	13890	110	5147	4998	3900	100	106	49	96	95	0	4203	3695	2953	108	114	61	82	80	0	0	0	0	0	0	0	0	0	0	0	0	0	0	0	0	0	0	0	1.232	1.365	1.288	1.419	1.939	1.312	0.874	0.000	0.000	0.000	0.000	0.000	0.000	0.000	0.000	0.000	0.000	0.000	0.000	0.000	0.000	80	544	9142	8485	0.302	Error	Error	5047	4095	0	0	4898	3587	0	0	0	0
3	13	4	"SCW4"	"YGR279C"	13780	13890	120	3760	3571	2697	104	167	524	79	74	0	4594	4185	3418	105	122	128	82	79	0	0	0	0	0	0	0	0	0	0	0	0	0	0	0	0	0	0	0	0.814	0.850	0.862	1.060	2.515	0.827	0.829	0.000	0.000	0.000	0.000	0.000	0.000	0.000	0.000	0.000	0.000	0.000	0.000	0.000	0.000	120	579	8145	7547	-0.296	Error	Error	3656	4489	0	0	3467	4080	0	0	0	0
3	14	4	""	"YHL013C"	13960	13890	110	13408	11051	8510	116	200	596	81	71	0	5328	4459	3564	108	133	219	75	70	0	0	0	0	0	0	0	0	0	0	0	0	0	0	0	0	0	0	0	2.546	2.513	2.493	3.037	2.418	2.503	0.888	0.000	0.000	0.000	0.000	0.000	0.000	0.000	0.000	0.000	0.000	0.000	0.000	0.000	0.000	80	462	18512	15286	1.348	Error	Error	13292	5220	0	0	10935	4351	0	0	0	0
3	15	4	""	"YHL045W"	14140	13890	120	13949	12275	8711	116	193	711	88	83	0	8082	7073	5112	111	184	687	79	75	0	0	0	0	0	0	0	0	0	0	0	0	0	0	0	0	0	0	0	1.735	1.746	1.771	2.257	2.483	1.780	0.914	0.000	0.000	0.000	0.000	0.000	0.000	0.000	0.000	0.000	0.000	0.000	0.000	0.000	0.000	120	552	21804	19121	0.795	Error	Error	13833	7971	0	0	12159	6962	0	0	0	0
3	16	4	"YOR1"	"YGR281W"	14340	13890	120	1240	1276	748	108	178	440	84	68	0	761	802	500	114	148	237	81	65	0	0	0	0	0	0	0	0	0	0	0	0	0	0	0	0	0	0	0	1.750	1.698	1.770	1.789	1.644	1.655	0.832	0.000	0.000	0.000	0.000	0.000	0.000	0.000	0.000	0.000	0.000	0.000	0.000	0.000	0.000	120	555	1779	1856	0.807	Error	Error	1132	647	0	0	1168	688	0	0	0	0
3	17	4	"RPS20"	"YHL015W"	14540	13890	110	3886	3179	2226	109	235	627	73	66	0	3984	3146	2089	109	167	311	76	73	0	0	0	0	0	0	0	0	0	0	0	0	0	0	0	0	0	0	0	0.975	1.011	1.037	1.019	2.524	1.044	0.874	0.000	0.000	0.000	0.000	0.000	0.000	0.000	0.000	0.000	0.000	0.000	0.000	0.000	0.000	80	503	7652	6107	-0.037	Error	Error	3777	3875	0	0	3070	3037	0	0	0	0
3	18	4	""	"YHL047C"	14720	13900	110	5980	7139	5849	109	181	469	86	82	0	4089	4938	4200	108	166	451	76	75	0	0	0	0	0	0	0	0	0	0	0	0	0	0	0	0	0	0	0	1.475	1.455	1.451	1.711	2.727	1.470	0.895	0.000	0.000	0.000	0.000	0.000	0.000	0.000	0.000	0.000	0.000	0.000	0.000	0.000	0.000	80	493	9852	11860	0.560	Error	Error	5871	3981	0	0	7030	4830	0	0	0	0
3	19	4	""	"YIL077C"	14900	13890	110	12956	11608	5833	112	240	872	95	91	0	6502	5365	3067	109	217	702	87	78	0	0	0	0	0	0	0	0	0	0	0	0	0	0	0	0	0	0	0	2.009	2.187	2.155	2.444	1.824	2.044	0.908	0.000	0.000	0.000	0.000	0.000	0.000	0.000	0.000	0.000	0.000	0.000	0.000	0.000	0.000	80	516	19237	16752	1.007	Error	Error	12844	6393	0	0	11496	5256	0	0	0	0
3	20	4	"SEC24"	"YIL109C"	15090	13890	110	9295	9596	6065	118	258	902	88	86	0	6439	7813	5768	115	232	726	83	77	0	0	0	0	0	0	0	0	0	0	0	0	0	0	0	0	0	0	0	1.451	1.231	1.261	1.368	1.874	1.149	0.893	0.000	0.000	0.000	0.000	0.000	0.000	0.000	0.000	0.000	0.000	0.000	0.000	0.000	0.000	80	481	15501	17176	0.537	Error	Error	9177	6324	0	0	9478	7698	0	0	0	0
3	21	4	""	"YIL141W"	15280	13890	120	6348	5167	3073	116	209	514	85	78	0	5179	4265	2958	116	216	651	72	70	0	0	0	0	0	0	0	0	0	0	0	0	0	0	0	0	0	0	0	1.231	1.217	1.216	1.475	2.387	1.133	0.877	0.000	0.000	0.000	0.000	0.000	0.000	0.000	0.000	0.000	0.000	0.000	0.000	0.000	0.000	120	581	11295	9200	0.300	Error	Error	6232	5063	0	0	5051	4149	0	0	0	0
3	22	4	""	"YIL079C"	15490	13890	100	2852	2745	2212	111	232	619	66	62	0	6032	5138	4415	111	219	688	66	61	0	0	0	0	0	0	0	0	0	0	0	0	0	0	0	0	0	0	0	0.463	0.524	0.513	0.660	2.742	0.502	0.873	0.000	0.000	0.000	0.000	0.000	0.000	0.000	0.000	0.000	0.000	0.000	0.000	0.000	0.000	80	455	8662	7661	-1.111	Error	Error	2741	5921	0	0	2634	5027	0	0	0	0
3	1	5	"COX5b"	"YIL111W"	11500	14080	110	2602	2578	1808	99	154	477	76	70	0	2567	2436	1828	108	127	163	78	76	0	0	0	0	0	0	0	0	0	0	0	0	0	0	0	0	0	0	0	1.018	1.065	1.027	1.267	2.477	1.049	0.850	0.000	0.000	0.000	0.000	0.000	0.000	0.000	0.000	0.000	0.000	0.000	0.000	0.000	0.000	80	552	4962	4807	0.026	Error	Error	2503	2459	0	0	2479	2328	0	0	0	0
3	2	5	"SSL2"	"YIL143C"	11680	14080	110	6153	7324	6916	106	121	191	88	87	0	4854	5813	5949	109	126	188	80	78	0	0	0	0	0	0	0	0	0	0	0	0	0	0	0	0	0	0	0	1.274	1.265	1.262	1.717	2.664	1.193	0.914	0.000	0.000	0.000	0.000	0.000	0.000	0.000	0.000	0.000	0.000	0.000	0.000	0.000	0.000	80	504	10792	12922	0.350	Error	Error	6047	4745	0	0	7218	5704	0	0	0	0
3	3	5	""	"YIL082W"	11870	14080	120	17488	15768	7804	113	142	176	100	99	0	25617	22780	13296	122	211	580	95	90	0	0	0	0	0	0	0	0	0	0	0	0	0	0	0	0	0	0	0	0.682	0.691	0.684	0.793	1.766	0.639	0.928	0.000	0.000	0.000	0.000	0.000	0.000	0.000	0.000	0.000	0.000	0.000	0.000	0.000	0.000	120	607	42870	38313	-0.553	Error	Error	17375	25495	0	0	15655	22658	0	0	0	0
3	4	5	""	"YIL113W"	12070	14080	110	1189	1042	666	112	171	327	72	65	0	3015	2500	1790	123	270	969	68	61	0	0	0	0	0	0	0	0	0	0	0	0	0	0	0	0	0	0	0	0.372	0.391	0.391	0.487	2.578	0.371	0.857	0.000	0.000	0.000	0.000	0.000	0.000	0.000	0.000	0.000	0.000	0.000	0.000	0.000	0.000	80	523	3969	3307	-1.425	Error	Error	1077	2892	0	0	930	2377	0	0	0	0
3	5	5	""	"YIL145C"	12250	14090	110	2317	2190	1472	106	157	331	76	71	0	8744	7562	5506	114	233	944	77	70	0	0	0	0	0	0	0	0	0	0	0	0	0	0	0	0	0	0	0	0.256	0.280	0.287	0.327	2.088	0.257	0.878	0.000	0.000	0.000	0.000	0.000	0.000	0.000	0.000	0.000	0.000	0.000	0.000	0.000	0.000	80	475	10841	9532	-1.965	Error	Error	2211	8630	0	0	2084	7448	0	0	0	0
3	6	5	""	"YIL083C"	12410	14080	110	1832	1620	850	99	117	106	90	90	0	4482	3914	2336	107	170	422	81	78	0	0	0	0	0	0	0	0	0	0	0	0	0	0	0	0	0	0	0	0.396	0.400	0.407	0.491	2.210	0.359	0.903	0.000	0.000	0.000	0.000	0.000	0.000	0.000	0.000	0.000	0.000	0.000	0.000	0.000	0.000	80	517	6108	5328	-1.336	Error	Error	1733	4375	0	0	1521	3807	0	0	0	0
3	7	5	"NUP159"	"YIL115C"	12650	14090	90	386	403	186	103	123	89	86	73	0	810	786	427	105	151	171	82	78	0	0	0	0	0	0	0	0	0	0	0	0	0	0	0	0	0	0	0	0.401	0.441	0.463	0.439	2.007	0.399	0.734	0.000	0.000	0.000	0.000	0.000	0.000	0.000	0.000	0.000	0.000	0.000	0.000	0.000	0.000	52	346	988	981	-1.317	Error	Error	283	705	0	0	300	681	0	0	0	0
3	8	5	"SLN1"	"YIL147C"	12800	14090	120	4174	4246	2736	100	103	41	98	98	0	3870	4025	2757	104	110	35	95	90	0	0	0	0	0	0	0	0	0	0	0	0	0	0	0	0	0	0	0	1.082	1.057	1.063	1.283	2.518	1.039	0.853	0.000	0.000	0.000	0.000	0.000	0.000	0.000	0.000	0.000	0.000	0.000	0.000	0.000	0.000	120	532	7840	8067	0.113	Error	Error	4074	3766	0	0	4146	3921	0	0	0	0
3	9	5	""	"YJR015W"	13000	14090	120	9295	9620	5703	101	110	57	99	99	0	3471	3028	1816	105	121	140	90	88	0	0	0	0	0	0	0	0	0	0	0	0	0	0	0	0	0	0	0	2.731	3.257	3.209	3.619	2.022	3.302	0.910	0.000	0.000	0.000	0.000	0.000	0.000	0.000	0.000	0.000	0.000	0.000	0.000	0.000	0.000	120	556	12560	12442	1.450	Error	Error	9194	3366	0	0	9519	2923	0	0	0	0
3	10	5	"ANB1"	"YJR047C"	13190	14090	120	4540	3695	2092	106	123	164	93	88	0	3922	3321	2014	108	131	257	80	78	0	0	0	0	0	0	0	0	0	0	0	0	0	0	0	0	0	0	0	1.163	1.117	1.094	1.300	2.147	1.090	0.901	0.000	0.000	0.000	0.000	0.000	0.000	0.000	0.000	0.000	0.000	0.000	0.000	0.000	0.000	120	563	8248	6802	0.217	Error	Error	4434	3814	0	0	3589	3213	0	0	0	0
3	11	5	""	"YJR079W"	13380	14090	110	305	332	188	102	123	155	62	22	0	395	411	227	107	116	52	85	82	0	0	0	0	0	0	0	0	0	0	0	0	0	0	0	0	0	0	0	0.705	0.757	0.701	0.693	1.912	0.762	0.550	0.000	0.000	0.000	0.000	0.000	0.000	0.000	0.000	0.000	0.000	0.000	0.000	0.000	0.000	80	505	491	534	-0.505	Error	Error	203	288	0	0	230	304	0	0	0	0
3	12	5	"ess1"	"YJR017C"	13560	14080	110	3420	2698	1812	102	119	159	83	82	0	3432	2860	2068	105	111	40	83	83	0	0	0	0	0	0	0	0	0	0	0	0	0	0	0	0	0	0	0	0.997	0.942	0.910	0.964	2.250	0.896	0.897	0.000	0.000	0.000	0.000	0.000	0.000	0.000	0.000	0.000	0.000	0.000	0.000	0.000	0.000	80	487	6645	5351	-0.004	Error	Error	3318	3327	0	0	2596	2755	0	0	0	0
3	13	5	"UTR1"	"YJR049C"	13740	14090	120	3408	3565	2268	106	111	64	98	98	0	4791	4511	3076	109	116	40	94	90	0	0	0	0	0	0	0	0	0	0	0	0	0	0	0	0	0	0	0	0.705	0.786	0.795	0.961	2.356	0.749	0.897	0.000	0.000	0.000	0.000	0.000	0.000	0.000	0.000	0.000	0.000	0.000	0.000	0.000	0.000	120	534	7984	7861	-0.504	Error	Error	3302	4682	0	0	3459	4402	0	0	0	0
3	14	5	""	"YJR082C"	13930	14090	120	2561	2141	1433	112	379	1182	65	50	0	5509	4615	3137	115	317	1042	74	68	0	0	0	0	0	0	0	0	0	0	0	0	0	0	0	0	0	0	0	0.454	0.451	0.468	0.513	2.756	0.447	0.894	0.000	0.000	0.000	0.000	0.000	0.000	0.000	0.000	0.000	0.000	0.000	0.000	0.000	0.000	120	595	7843	6529	-1.139	Error	Error	2449	5394	0	0	2029	4500	0	0	0	0
3	15	5	"TES1"	"YJR019C"	14150	14090	110	5625	5182	3632	112	461	1406	76	67	0	5624	5151	3760	111	389	1253	72	71	0	0	0	0	0	0	0	0	0	0	0	0	0	0	0	0	0	0	0	1.000	1.006	1.051	1.136	1.962	0.990	0.909	0.000	0.000	0.000	0.000	0.000	0.000	0.000	0.000	0.000	0.000	0.000	0.000	0.000	0.000	80	463	11026	10110	0.000	Error	Error	5513	5513	0	0	5070	5040	0	0	0	0
3	16	5	"osm1"	"YJR051W"	14290	14080	110	5148	4646	3302	105	118	70	95	91	0	9258	8645	6940	111	134	154	77	76	0	0	0	0	0	0	0	0	0	0	0	0	0	0	0	0	0	0	0	0.551	0.532	0.553	0.787	2.775	0.483	0.883	0.000	0.000	0.000	0.000	0.000	0.000	0.000	0.000	0.000	0.000	0.000	0.000	0.000	0.000	80	434	14190	13075	-0.859	Error	Error	5043	9147	0	0	4541	8534	0	0	0	0
3	17	5	""	"YJR084W"	14480	14080	110	3071	2746	1581	105	140	263	85	83	0	6313	5399	3448	110	166	361	82	80	0	0	0	0	0	0	0	0	0	0	0	0	0	0	0	0	0	0	0	0.478	0.499	0.493	0.597	2.178	0.464	0.858	0.000	0.000	0.000	0.000	0.000	0.000	0.000	0.000	0.000	0.000	0.000	0.000	0.000	0.000	80	535	9169	7930	-1.064	Error	Error	2966	6203	0	0	2641	5289	0	0	0	0
3	18	5	"rec107"	"YJR021C"	14670	14080	110	6957	5630	3267	108	234	692	82	81	0	6442	5382	3648	109	295	863	76	71	0	0	0	0	0	0	0	0	0	0	0	0	0	0	0	0	0	0	0	1.081	1.047	1.057	1.320	2.781	0.991	0.885	0.000	0.000	0.000	0.000	0.000	0.000	0.000	0.000	0.000	0.000	0.000	0.000	0.000	0.000	80	510	13182	10795	0.113	Error	Error	6849	6333	0	0	5522	5273	0	0	0	0
3	19	5	"BFA1"	"YJR053W"	14860	14090	120	2945	2882	1852	105	214	651	80	72	0	4923	4922	3474	106	243	756	80	75	0	0	0	0	0	0	0	0	0	0	0	0	0	0	0	0	0	0	0	0.590	0.577	0.595	0.751	2.676	0.550	0.847	0.000	0.000	0.000	0.000	0.000	0.000	0.000	0.000	0.000	0.000	0.000	0.000	0.000	0.000	120	585	7657	7593	-0.762	Error	Error	2840	4817	0	0	2777	4816	0	0	0	0
3	20	5	"ste18"	"YJR086W"	15060	14080	110	1027	876	406	102	114	58	88	86	0	1826	1523	820	106	113	44	87	85	0	0	0	0	0	0	0	0	0	0	0	0	0	0	0	0	0	0	0	0.538	0.546	0.537	0.519	1.773	0.525	0.869	0.000	0.000	0.000	0.000	0.000	0.000	0.000	0.000	0.000	0.000	0.000	0.000	0.000	0.000	80	514	2645	2191	-0.895	Error	Error	925	1720	0	0	774	1417	0	0	0	0
3	21	5	""	"YKR007W"	15240	14080	110	9468	7623	4028	109	205	725	88	83	0	6456	5182	2980	108	216	748	80	77	0	0	0	0	0	0	0	0	0	0	0	0	0	0	0	0	0	0	0	1.474	1.481	1.488	1.715	2.130	1.439	0.892	0.000	0.000	0.000	0.000	0.000	0.000	0.000	0.000	0.000	0.000	0.000	0.000	0.000	0.000	80	504	15707	12588	0.560	Error	Error	9359	6348	0	0	7514	5074	0	0	0	0
3	22	5	""	"YKR038C"	15430	14080	110	3723	3245	1674	111	217	728	86	75	0	10372	8805	4953	109	229	751	88	85	0	0	0	0	0	0	0	0	0	0	0	0	0	0	0	0	0	0	0	0.352	0.360	0.368	0.459	2.645	0.339	0.909	0.000	0.000	0.000	0.000	0.000	0.000	0.000	0.000	0.000	0.000	0.000	0.000	0.000	0.000	80	539	13875	11830	-1.507	Error	Error	3612	10263	0	0	3134	8696	0	0	0	0
3	1	6	""	"YKR070W"	11460	14280	120	11727	11575	5400	97	112	112	99	99	0	3289	3066	1516	98	104	32	98	95	0	0	0	0	0	0	0	0	0	0	0	0	0	0	0	0	0	0	0	3.645	3.867	4.034	4.510	1.965	4.010	0.900	0.000	0.000	0.000	0.000	0.000	0.000	0.000	0.000	0.000	0.000	0.000	0.000	0.000	0.000	120	548	14821	14446	1.866	Error	Error	11630	3191	0	0	11478	2968	0	0	0	0
3	2	6	"FOX2"	"YKR009C"	11630	14270	110	13902	14481	8509	101	111	54	100	100	0	4581	4589	2772	104	110	37	93	93	0	0	0	0	0	0	0	0	0	0	0	0	0	0	0	0	0	0	0	3.083	3.206	3.227	3.654	2.099	3.224	0.908	0.000	0.000	0.000	0.000	0.000	0.000	0.000	0.000	0.000	0.000	0.000	0.000	0.000	0.000	80	480	18278	18865	1.624	Error	Error	13801	4477	0	0	14380	4485	0	0	0	0
3	3	6	""	"YKR040C"	11830	14280	110	1264	1072	553	103	157	254	80	75	0	4033	3160	1760	111	305	895	78	75	0	0	0	0	0	0	0	0	0	0	0	0	0	0	0	0	0	0	0	0.296	0.318	0.325	0.369	2.025	0.298	0.887	0.000	0.000	0.000	0.000	0.000	0.000	0.000	0.000	0.000	0.000	0.000	0.000	0.000	0.000	80	514	5083	4018	-1.756	Error	Error	1161	3922	0	0	969	3049	0	0	0	0
3	4	6	"sis2"	"YKR072C"	12010	14270	110	6030	6406	3559	108	221	589	95	87	0	8593	8456	5520	120	474	1548	83	77	0	0	0	0	0	0	0	0	0	0	0	0	0	0	0	0	0	0	0	0.699	0.756	0.790	0.932	2.082	0.678	0.845	0.000	0.000	0.000	0.000	0.000	0.000	0.000	0.000	0.000	0.000	0.000	0.000	0.000	0.000	80	521	14395	14634	-0.517	Error	Error	5922	8473	0	0	6298	8336	0	0	0	0
3	5	6	""	"YKR011C"	12210	14280	120	4838	4220	2342	106	177	524	92	85	0	6819	5663	3210	115	276	1230	82	74	0	0	0	0	0	0	0	0	0	0	0	0	0	0	0	0	0	0	0	0.706	0.742	0.748	0.779	1.890	0.729	0.884	0.000	0.000	0.000	0.000	0.000	0.000	0.000	0.000	0.000	0.000	0.000	0.000	0.000	0.000	120	583	11436	9662	-0.503	Error	Error	4732	6704	0	0	4114	5548	0	0	0	0
3	6	6	"UTH1"	"YKR042W"	12400	14280	120	2995	2790	1554	102	113	82	99	95	0	3589	3075	1815	111	126	149	88	85	0	0	0	0	0	0	0	0	0	0	0	0	0	0	0	0	0	0	0	0.832	0.907	0.923	1.079	2.195	0.881	0.903	0.000	0.000	0.000	0.000	0.000	0.000	0.000	0.000	0.000	0.000	0.000	0.000	0.000	0.000	120	542	6371	5652	-0.266	Error	Error	2893	3478	0	0	2688	2964	0	0	0	0
3	7	6	""	"YKR074W"	12590	14280	120	3142	2680	1051	102	130	323	93	90	0	3188	2684	1255	108	151	451	85	82	0	0	0	0	0	0	0	0	0	0	0	0	0	0	0	0	0	0	0	0.987	1.001	1.001	1.184	1.935	0.940	0.923	0.000	0.000	0.000	0.000	0.000	0.000	0.000	0.000	0.000	0.000	0.000	0.000	0.000	0.000	120	571	6120	5154	-0.019	Error	Error	3040	3080	0	0	2578	2576	0	0	0	0
3	8	6	"PRY2"	"YKR013W"	12780	14270	110	8568	7540	3474	108	131	207	100	98	0	6393	5480	2812	113	164	389	90	81	0	0	0	0	0	0	0	0	0	0	0	0	0	0	0	0	0	0	0	1.347	1.385	1.390	1.645	1.851	1.332	0.896	0.000	0.000	0.000	0.000	0.000	0.000	0.000	0.000	0.000	0.000	0.000	0.000	0.000	0.000	80	455	14740	12799	0.430	Error	Error	8460	6280	0	0	7432	5367	0	0	0	0
3	9	6	""	"YKR044W"	12950	14270	110	18464	15475	7414	113	179	453	100	97	0	11583	9461	4960	117	236	740	87	86	0	0	0	0	0	0	0	0	0	0	0	0	0	0	0	0	0	0	0	1.600	1.644	1.649	2.021	2.144	1.613	0.915	0.000	0.000	0.000	0.000	0.000	0.000	0.000	0.000	0.000	0.000	0.000	0.000	0.000	0.000	80	475	29817	24706	0.678	Error	Error	18351	11466	0	0	15362	9344	0	0	0	0
3	10	6	"ECM4"	"YKR076W"	13150	14280	120	4703	4046	1704	113	168	481	96	89	0	10234	8753	3938	117	197	640	96	93	0	0	0	0	0	0	0	0	0	0	0	0	0	0	0	0	0	0	0	0.454	0.455	0.462	0.497	1.634	0.431	0.903	0.000	0.000	0.000	0.000	0.000	0.000	0.000	0.000	0.000	0.000	0.000	0.000	0.000	0.000	120	582	14707	12569	-1.140	Error	Error	4590	10117	0	0	3933	8636	0	0	0	0
3	11	6	"CRR1"	"YLR213C"	13360	14270	110	5149	4979	3239	103	109	39	100	100	0	9808	8909	6495	112	117	36	96	96	0	0	0	0	0	0	0	0	0	0	0	0	0	0	0	0	0	0	0	0.520	0.554	0.559	0.713	2.444	0.504	0.909	0.000	0.000	0.000	0.000	0.000	0.000	0.000	0.000	0.000	0.000	0.000	0.000	0.000	0.000	80	496	14742	13673	-0.942	Error	Error	5046	9696	0	0	4876	8797	0	0	0	0
3	12	6	""	"YLR243W"	13530	14270	110	336	342	168	103	143	257	41	6	0	356	407	339	112	137	207	62	26	0	0	0	0	0	0	0	0	0	0	0	0	0	0	0	0	0	0	0	0.955	0.810	0.830	0.924	2.407	0.744	0.561	0.000	0.000	0.000	0.000	0.000	0.000	0.000	0.000	0.000	0.000	0.000	0.000	0.000	0.000	80	522	477	534	-0.067	Error	Error	233	244	0	0	239	295	0	0	0	0
3	13	6	"PIG1"	"YLR273C"	13740	14270	110	1796	2349	1768	102	138	240	85	82	0	3707	4122	3475	110	143	227	83	77	0	0	0	0	0	0	0	0	0	0	0	0	0	0	0	0	0	0	0	0.471	0.560	0.579	0.658	2.099	0.529	0.884	0.000	0.000	0.000	0.000	0.000	0.000	0.000	0.000	0.000	0.000	0.000	0.000	0.000	0.000	80	497	5291	6259	-1.086	Error	Error	1694	3597	0	0	2247	4012	0	0	0	0
3	14	6	""	"YLR215C"	13910	14270	110	7426	6976	4881	108	115	59	97	97	0	4119	4194	3256	110	126	105	85	82	0	0	0	0	0	0	0	0	0	0	0	0	0	0	0	0	0	0	0	1.825	1.682	1.704	2.080	2.415	1.612	0.918	0.000	0.000	0.000	0.000	0.000	0.000	0.000	0.000	0.000	0.000	0.000	0.000	0.000	0.000	80	470	11327	10952	0.868	Error	Error	7318	4009	0	0	6868	4084	0	0	0	0
3	15	6	"CDD1"	"YLR245C"	14100	14270	110	1387	1236	674	112	181	549	73	66	0	1852	1520	939	110	153	345	76	68	0	0	0	0	0	0	0	0	0	0	0	0	0	0	0	0	0	0	0	0.732	0.797	0.796	0.871	1.933	0.735	0.888	0.000	0.000	0.000	0.000	0.000	0.000	0.000	0.000	0.000	0.000	0.000	0.000	0.000	0.000	80	509	3017	2534	-0.450	Error	Error	1275	1742	0	0	1124	1410	0	0	0	0
3	16	6	"SMD2"	"YLR275W"	14290	14270	120	14138	11559	7432	104	114	61	100	100	0	3153	2489	1533	108	120	117	82	80	0	0	0	0	0	0	0	0	0	0	0	0	0	0	0	0	0	0	0	4.609	4.811	4.919	5.486	2.042	5.131	0.903	0.000	0.000	0.000	0.000	0.000	0.000	0.000	0.000	0.000	0.000	0.000	0.000	0.000	0.000	120	570	17079	13836	2.204	Error	Error	14034	3045	0	0	11455	2381	0	0	0	0
3	17	6	""	"YLR217W"	14480	14270	110	2446	2056	1184	109	130	123	87	86	0	5133	4074	2594	111	136	147	83	81	0	0	0	0	0	0	0	0	0	0	0	0	0	0	0	0	0	0	0	0.465	0.491	0.476	0.550	2.119	0.454	0.897	0.000	0.000	0.000	0.000	0.000	0.000	0.000	0.000	0.000	0.000	0.000	0.000	0.000	0.000	80	546	7359	5910	-1.104	Error	Error	2337	5022	0	0	1947	3963	0	0	0	0
3	18	6	""	"YLR247C"	14710	14270	100	814	1226	1082	102	167	450	71	41	0	1061	1391	1304	108	161	399	72	56	0	0	0	0	0	0	0	0	0	0	0	0	0	0	0	0	0	0	0	0.747	0.876	0.846	0.974	2.593	0.847	0.876	0.000	0.000	0.000	0.000	0.000	0.000	0.000	0.000	0.000	0.000	0.000	0.000	0.000	0.000	80	460	1665	2407	-0.421	Error	Error	712	953	0	0	1124	1283	0	0	0	0
3	19	6	"YSH1"	"YLR277C"	14870	14270	110	1799	2115	1680	96	108	76	92	86	0	2901	3332	2827	106	116	70	85	82	0	0	0	0	0	0	0	0	0	0	0	0	0	0	0	0	0	0	0	0.609	0.626	0.620	0.769	2.596	0.594	0.877	0.000	0.000	0.000	0.000	0.000	0.000	0.000	0.000	0.000	0.000	0.000	0.000	0.000	0.000	80	463	4498	5245	-0.715	Error	Error	1703	2795	0	0	2019	3226	0	0	0	0
3	20	6	""	"YLR219W"	15060	14270	110	6109	6992	6255	99	109	77	97	95	0	5256	7666	7372	104	115	78	92	91	0	0	0	0	0	0	0	0	0	0	0	0	0	0	0	0	0	0	0	1.167	0.912	0.895	1.145	2.295	0.847	0.920	0.000	0.000	0.000	0.000	0.000	0.000	0.000	0.000	0.000	0.000	0.000	0.000	0.000	0.000	80	539	11162	14455	0.222	Error	Error	6010	5152	0	0	6893	7562	0	0	0	0
3	21	6	"yef3"	"YLR249W"	15250	14270	110	1639	2144	2005	101	133	349	83	73	0	2177	2971	2777	104	129	261	90	80	0	0	0	0	0	0	0	0	0	0	0	0	0	0	0	0	0	0	0	0.742	0.713	0.695	0.794	2.152	0.688	0.867	0.000	0.000	0.000	0.000	0.000	0.000	0.000	0.000	0.000	0.000	0.000	0.000	0.000	0.000	80	526	3611	4910	-0.431	Error	Error	1538	2073	0	0	2043	2867	0	0	0	0
3	22	6	""	"YLR279W"	15450	14260	120	212	221	109	101	109	57	68	48	0	286	283	136	101	116	114	72	35	0	0	0	0	0	0	0	0	0	0	0	0	0	0	0	0	0	0	0	0.600	0.659	0.600	0.561	2.695	0.695	0.548	0.000	0.000	0.000	0.000	0.000	0.000	0.000	0.000	0.000	0.000	0.000	0.000	0.000	0.000	120	652	296	302	-0.737	Error	Error	111	185	0	0	120	182	0	0	0	0
3	1	7	"BUL2"	"YML111W"	11500	14440	120	5044	5427	3521	91	102	93	100	97	0	10308	10647	7039	98	103	30	98	98	0	0	0	0	0	0	0	0	0	0	0	0	0	0	0	0	0	0	0	0.485	0.506	0.501	0.582	1.931	0.495	0.913	0.000	0.000	0.000	0.000	0.000	0.000	0.000	0.000	0.000	0.000	0.000	0.000	0.000	0.000	120	550	15163	15885	-1.044	Error	Error	4953	10210	0	0	5336	10549	0	0	0	0
3	2	7	""	"YMR009W"	11660	14460	110	1910	1769	1146	95	103	51	92	86	0	3871	3620	2688	102	119	143	80	78	0	0	0	0	0	0	0	0	0	0	0	0	0	0	0	0	0	0	0	0.482	0.476	0.484	0.567	2.250	0.439	0.905	0.000	0.000	0.000	0.000	0.000	0.000	0.000	0.000	0.000	0.000	0.000	0.000	0.000	0.000	80	458	5584	5192	-1.054	Error	Error	1815	3769	0	0	1674	3518	0	0	0	0
3	3	7	""	"YMR040W"	11840	14460	110	1275	1145	566	100	165	266	80	78	0	2456	2138	1094	109	268	608	81	76	0	0	0	0	0	0	0	0	0	0	0	0	0	0	0	0	0	0	0	0.501	0.515	0.521	0.527	1.635	0.507	0.887	0.000	0.000	0.000	0.000	0.000	0.000	0.000	0.000	0.000	0.000	0.000	0.000	0.000	0.000	80	520	3522	3074	-0.998	Error	Error	1175	2347	0	0	1045	2029	0	0	0	0
3	4	7	"DAT1"	"YML113W"	12040	14460	110	3730	3306	1619	99	184	406	87	83	0	9422	7929	4467	110	266	726	83	82	0	0	0	0	0	0	0	0	0	0	0	0	0	0	0	0	0	0	0	0.390	0.410	0.409	0.499	1.968	0.373	0.898	0.000	0.000	0.000	0.000	0.000	0.000	0.000	0.000	0.000	0.000	0.000	0.000	0.000	0.000	80	547	12943	11026	-1.359	Error	Error	3631	9312	0	0	3207	7819	0	0	0	0
3	5	7	"HXT2"	"YMR011W"	12240	14470	110	12334	11380	7580	104	142	210	95	91	0	8628	7800	5938	112	143	314	86	76	0	0	0	0	0	0	0	0	0	0	0	0	0	0	0	0	0	0	0	1.436	1.467	1.411	1.995	2.641	1.378	0.902	0.000	0.000	0.000	0.000	0.000	0.000	0.000	0.000	0.000	0.000	0.000	0.000	0.000	0.000	80	512	20746	18964	0.522	Error	Error	12230	8516	0	0	11276	7688	0	0	0	0
3	6	7	"arg80"	"YMR042W"	12430	14460	110	1556	1380	1016	102	132	178	75	70	0	4058	3785	3216	109	143	322	70	66	0	0	0	0	0	0	0	0	0	0	0	0	0	0	0	0	0	0	0	0.368	0.348	0.364	0.457	2.855	0.304	0.856	0.000	0.000	0.000	0.000	0.000	0.000	0.000	0.000	0.000	0.000	0.000	0.000	0.000	0.000	80	488	5403	4954	-1.441	Error	Error	1454	3949	0	0	1278	3676	0	0	0	0
3	7	7	"van1"	"YML115C"	12610	14460	110	10756	9618	6719	105	330	1481	78	70	0	7450	6212	4635	109	335	1300	71	65	0	0	0	0	0	0	0	0	0	0	0	0	0	0	0	0	0	0	0	1.451	1.559	1.526	2.145	2.604	1.530	0.912	0.000	0.000	0.000	0.000	0.000	0.000	0.000	0.000	0.000	0.000	0.000	0.000	0.000	0.000	80	482	17992	15616	0.537	Error	Error	10651	7341	0	0	9513	6103	0	0	0	0
3	8	7	"sec59"	"YMR013C"	12800	14460	110	10082	9416	5856	116	374	1486	85	80	0	5532	4884	3185	109	380	1334	76	70	0	0	0	0	0	0	0	0	0	0	0	0	0	0	0	0	0	0	0	1.838	1.948	1.974	2.406	2.477	1.898	0.873	0.000	0.000	0.000	0.000	0.000	0.000	0.000	0.000	0.000	0.000	0.000	0.000	0.000	0.000	80	516	15389	14075	0.878	Error	Error	9966	5423	0	0	9300	4775	0	0	0	0
3	9	7	""	"YMR044W"	12980	14460	110	21804	20289	13923	119	603	3001	83	75	0	5595	4933	3668	112	350	1100	72	65	0	0	0	0	0	0	0	0	0	0	0	0	0	0	0	0	0	0	0	3.955	4.184	3.992	4.655	2.223	4.129	0.864	0.000	0.000	0.000	0.000	0.000	0.000	0.000	0.000	0.000	0.000	0.000	0.000	0.000	0.000	80	516	27168	24991	1.984	Error	Error	21685	5483	0	0	20170	4821	0	0	0	0
3	10	7	""	"YML117W"	13170	14460	110	4827	5877	4535	116	560	2992	70	38	0	5184	7160	6683	110	336	1077	81	78	0	0	0	0	0	0	0	0	0	0	0	0	0	0	0	0	0	0	0	0.928	0.817	0.905	1.015	2.048	0.717	0.876	0.000	0.000	0.000	0.000	0.000	0.000	0.000	0.000	0.000	0.000	0.000	0.000	0.000	0.000	80	508	9785	12811	-0.107	Error	Error	4711	5074	0	0	5761	7050	0	0	0	0
3	11	7	"ERG5"	"YMR015C"	13380	14470	120	15577	14538	7338	113	145	216	100	97	0	5931	5466	2969	114	194	522	89	87	0	0	0	0	0	0	0	0	0	0	0	0	0	0	0	0	0	0	0	2.658	2.695	2.759	3.041	1.962	2.769	0.897	0.000	0.000	0.000	0.000	0.000	0.000	0.000	0.000	0.000	0.000	0.000	0.000	0.000	0.000	120	581	21281	19777	1.411	Error	Error	15464	5817	0	0	14425	5352	0	0	0	0
3	12	7	""	"YMR046C"	13570	14470	120	20170	21487	9011	112	125	74	100	100	0	37296	37303	16328	118	140	90	99	99	2	0	0	0	0	0	0	0	0	0	0	0	0	0	0	0	0	0	0	0.540	0.575	0.595	0.633	1.798	0.553	0.904	0.000	0.000	0.000	0.000	0.000	0.000	0.000	0.000	0.000	0.000	0.000	0.000	0.000	0.000	120	605	57236	58560	-0.890	Error	Error	20058	37178	0	0	21375	37185	0	0	0	0
3	13	7	"PBI2"	"YNL015W"	13800	14460	110	1694	1415	832	108	119	92	87	83	0	953	792	511	111	123	78	75	71	0	0	0	0	0	0	0	0	0	0	0	0	0	0	0	0	0	0	0	1.884	1.919	1.842	2.028	1.931	1.892	0.859	0.000	0.000	0.000	0.000	0.000	0.000	0.000	0.000	0.000	0.000	0.000	0.000	0.000	0.000	80	498	2428	1988	0.914	Error	Error	1586	842	0	0	1307	681	0	0	0	0
3	14	7	""	"YNL047C"	13960	14470	120	4659	6029	5676	105	113	50	98	97	0	3648	4589	4522	104	113	51	86	80	0	0	0	0	0	0	0	0	0	0	0	0	0	0	0	0	0	0	0	1.285	1.321	1.339	1.647	2.990	1.299	0.896	0.000	0.000	0.000	0.000	0.000	0.000	0.000	0.000	0.000	0.000	0.000	0.000	0.000	0.000	120	533	8098	10409	0.362	Error	Error	4554	3544	0	0	5924	4485	0	0	0	0
3	15	7	""	"YNL078W"	14140	14460	110	2514	2336	1599	103	108	43	91	86	0	7016	6084	4684	104	113	42	88	81	0	0	0	0	0	0	0	0	0	0	0	0	0	0	0	0	0	0	0	0.349	0.373	0.358	0.553	3.152	0.340	0.877	0.000	0.000	0.000	0.000	0.000	0.000	0.000	0.000	0.000	0.000	0.000	0.000	0.000	0.000	80	497	9323	8213	-1.519	Error	Error	2411	6912	0	0	2233	5980	0	0	0	0
3	16	7	""	"YNL017C"	14330	14460	110	6149	5403	2866	106	110	43	98	96	0	6144	4892	2928	108	116	43	91	88	0	0	0	0	0	0	0	0	0	0	0	0	0	0	0	0	0	0	0	1.001	1.107	1.091	1.399	2.315	1.051	0.894	0.000	0.000	0.000	0.000	0.000	0.000	0.000	0.000	0.000	0.000	0.000	0.000	0.000	0.000	80	516	12079	10081	0.002	Error	Error	6043	6036	0	0	5297	4784	0	0	0	0
3	17	7	"SFB2"	"YNL049C"	14520	14460	110	4936	4901	4176	107	123	188	92	86	0	6103	6513	5392	109	134	248	81	77	0	0	0	0	0	0	0	0	0	0	0	0	0	0	0	0	0	0	0	0.806	0.749	0.717	0.859	2.532	0.741	0.891	0.000	0.000	0.000	0.000	0.000	0.000	0.000	0.000	0.000	0.000	0.000	0.000	0.000	0.000	80	526	10823	11198	-0.312	Error	Error	4829	5994	0	0	4794	6404	0	0	0	0
3	18	7	""	"YNL080C"	14710	14470	120	8128	7301	4759	110	146	323	97	90	0	5690	5091	3549	113	132	172	90	84	0	0	0	0	0	0	0	0	0	0	0	0	0	0	0	0	0	0	0	1.438	1.445	1.444	1.727	2.278	1.425	0.896	0.000	0.000	0.000	0.000	0.000	0.000	0.000	0.000	0.000	0.000	0.000	0.000	0.000	0.000	120	607	13595	12169	0.524	Error	Error	8018	5577	0	0	7191	4978	0	0	0	0
3	19	7	""	"YNL019C"	14920	14460	110	7200	6363	4353	106	152	358	86	82	0	13192	10894	7924	113	137	194	85	81	0	0	0	0	0	0	0	0	0	0	0	0	0	0	0	0	0	0	0	0.542	0.580	0.564	0.772	2.991	0.542	0.891	0.000	0.000	0.000	0.000	0.000	0.000	0.000	0.000	0.000	0.000	0.000	0.000	0.000	0.000	80	501	20173	17038	-0.883	Error	Error	7094	13079	0	0	6257	10781	0	0	0	0
3	20	7	""	"YNL051W"	15080	14470	110	9614	9353	7363	109	123	105	97	92	0	3809	3424	2759	106	134	205	78	75	0	0	0	0	0	0	0	0	0	0	0	0	0	0	0	0	0	0	0	2.567	2.786	2.727	2.940	1.659	2.710	0.908	0.000	0.000	0.000	0.000	0.000	0.000	0.000	0.000	0.000	0.000	0.000	0.000	0.000	0.000	80	493	13208	12562	1.360	Error	Error	9505	3703	0	0	9244	3318	0	0	0	0
3	21	7	"pms1"	"YNL082W"	15280	14460	110	9966	12105	10302	107	125	110	98	98	0	3447	4056	3550	106	135	202	83	80	0	0	0	0	0	0	0	0	0	0	0	0	0	0	0	0	0	0	0	2.951	3.037	2.996	3.824	2.403	3.076	0.885	0.000	0.000	0.000	0.000	0.000	0.000	0.000	0.000	0.000	0.000	0.000	0.000	0.000	0.000	80	520	13200	15948	1.561	Error	Error	9859	3341	0	0	11998	3950	0	0	0	0
3	22	7	"HDA1"	"YNL021W"	15470	14470	120	3055	3022	2074	104	111	56	96	95	0	4390	4088	3110	106	115	46	90	86	0	0	0	0	0	0	0	0	0	0	0	0	0	0	0	0	0	0	0	0.689	0.733	0.728	0.889	2.206	0.681	0.884	0.000	0.000	0.000	0.000	0.000	0.000	0.000	0.000	0.000	0.000	0.000	0.000	0.000	0.000	120	628	7235	6900	-0.538	Error	Error	2951	4284	0	0	2918	3982	0	0	0	0
3	1	8	"MSG5"	"YNL053W"	11470	14660	110	4081	3803	2494	92	104	91	92	86	0	6449	5803	4063	97	106	64	88	82	0	0	0	0	0	0	0	0	0	0	0	0	0	0	0	0	0	0	0	0.628	0.650	0.658	0.820	2.378	0.619	0.897	0.000	0.000	0.000	0.000	0.000	0.000	0.000	0.000	0.000	0.000	0.000	0.000	0.000	0.000	80	560	10341	9417	-0.671	Error	Error	3989	6352	0	0	3711	5706	0	0	0	0
3	2	8	"END3"	"YNL084C"	11680	14650	110	7460	7954	6740	96	118	144	93	86	0	3202	3121	2561	102	111	60	83	77	0	0	0	0	0	0	0	0	0	0	0	0	0	0	0	0	0	0	0	2.375	2.603	2.497	2.809	2.504	2.778	0.841	0.000	0.000	0.000	0.000	0.000	0.000	0.000	0.000	0.000	0.000	0.000	0.000	0.000	0.000	80	567	10464	10877	1.248	Error	Error	7364	3100	0	0	7858	3019	0	0	0	0
3	3	8	"BIO5"	"YNR056C"	11890	14650	110	4164	4795	3519	96	130	197	87	85	0	8799	9222	7450	102	149	321	83	82	0	0	0	0	0	0	0	0	0	0	0	0	0	0	0	0	0	0	0	0.468	0.515	0.523	0.682	2.583	0.479	0.892	0.000	0.000	0.000	0.000	0.000	0.000	0.000	0.000	0.000	0.000	0.000	0.000	0.000	0.000	80	528	12765	13819	-1.096	Error	Error	4068	8697	0	0	4699	9120	0	0	0	0
3	4	8	"PLB3"	"YOL011W"	12060	14660	120	3690	3949	2576	96	102	39	97	97	0	3962	4203	2942	104	108	29	95	92	0	0	0	0	0	0	0	0	0	0	0	0	0	0	0	0	0	0	0	0.932	0.940	0.977	1.147	2.350	0.905	0.885	0.000	0.000	0.000	0.000	0.000	0.000	0.000	0.000	0.000	0.000	0.000	0.000	0.000	0.000	120	565	7452	7952	-0.102	Error	Error	3594	3858	0	0	3853	4099	0	0	0	0
3	5	8	""	"YOL042W"	12260	14650	110	10515	9563	6552	107	126	138	100	98	0	3509	3515	2792	107	118	106	91	86	0	0	0	0	0	0	0	0	0	0	0	0	0	0	0	0	0	0	0	3.059	2.775	2.626	3.925	2.730	2.603	0.877	0.000	0.000	0.000	0.000	0.000	0.000	0.000	0.000	0.000	0.000	0.000	0.000	0.000	0.000	80	503	13810	12864	1.613	Error	Error	10408	3402	0	0	9456	3408	0	0	0	0
3	6	8	"BIO3"	"YNR058W"	12440	14650	110	3069	2889	1991	105	133	178	86	82	0	3929	3651	2708	105	133	285	77	76	0	0	0	0	0	0	0	0	0	0	0	0	0	0	0	0	0	0	0	0.775	0.785	0.780	1.092	2.923	0.744	0.887	0.000	0.000	0.000	0.000	0.000	0.000	0.000	0.000	0.000	0.000	0.000	0.000	0.000	0.000	80	485	6788	6330	-0.368	Error	Error	2964	3824	0	0	2784	3546	0	0	0	0
3	7	8	"HRD1"	"YOL013C"	12620	14660	120	5119	5144	3646	98	182	862	81	72	0	7474	7478	5833	100	164	624	76	72	0	0	0	0	0	0	0	0	0	0	0	0	0	0	0	0	0	0	0	0.681	0.684	0.698	0.935	2.556	0.640	0.911	0.000	0.000	0.000	0.000	0.000	0.000	0.000	0.000	0.000	0.000	0.000	0.000	0.000	0.000	120	566	12395	12424	-0.554	Error	Error	5021	7374	0	0	5046	7378	0	0	0	0
3	8	8	"PEX15"	"YOL044W"	12810	14650	110	6373	6382	3823	102	135	308	91	87	0	2613	2589	1622	102	120	212	83	83	0	0	0	0	0	0	0	0	0	0	0	0	0	0	0	0	0	0	0	2.497	2.525	2.562	2.659	1.655	2.578	0.885	0.000	0.000	0.000	0.000	0.000	0.000	0.000	0.000	0.000	0.000	0.000	0.000	0.000	0.000	80	504	8782	8767	1.320	Error	Error	6271	2511	0	0	6280	2487	0	0	0	0
3	9	8	"FRE4"	"YNR060W"	13010	14660	120	4956	5269	3921	105	287	1704	74	64	0	3448	3773	3174	105	175	575	74	70	0	0	0	0	0	0	0	0	0	0	0	0	0	0	0	0	0	0	0	1.451	1.408	1.450	1.920	2.805	1.355	0.853	0.000	0.000	0.000	0.000	0.000	0.000	0.000	0.000	0.000	0.000	0.000	0.000	0.000	0.000	120	603	8194	8832	0.537	Error	Error	4851	3343	0	0	5164	3668	0	0	0	0
3	10	8	""	"YOL014W"	13200	14650	110	2352	1964	1245	98	141	271	76	75	0	879	753	508	100	129	348	67	55	0	0	0	0	0	0	0	0	0	0	0	0	0	0	0	0	0	0	0	2.893	2.858	2.791	2.610	2.434	2.858	0.843	0.000	0.000	0.000	0.000	0.000	0.000	0.000	0.000	0.000	0.000	0.000	0.000	0.000	0.000	80	482	3033	2519	1.533	Error	Error	2254	779	0	0	1866	653	0	0	0	0
3	11	8	""	"YOL046C"	13380	14660	120	2590	2549	1717	104	113	58	93	87	0	4452	4089	2966	102	121	85	87	80	0	0	0	0	0	0	0	0	0	0	0	0	0	0	0	0	0	0	0	0.571	0.613	0.635	0.792	2.514	0.573	0.886	0.000	0.000	0.000	0.000	0.000	0.000	0.000	0.000	0.000	0.000	0.000	0.000	0.000	0.000	120	515	6836	6432	-0.807	Error	Error	2486	4350	0	0	2445	3987	0	0	0	0
3	12	8	""	"YNR062C"	13570	14660	120	2416	2399	1463	110	153	292	86	81	0	4386	4308	2940	111	133	108	89	87	0	0	0	0	0	0	0	0	0	0	0	0	0	0	0	0	0	0	0	0.539	0.545	0.555	0.629	2.238	0.510	0.899	0.000	0.000	0.000	0.000	0.000	0.000	0.000	0.000	0.000	0.000	0.000	0.000	0.000	0.000	120	530	6581	6486	-0.891	Error	Error	2306	4275	0	0	2289	4197	0	0	0	0
3	13	8	"CMK2"	"YOL016C"	13770	14650	110	4344	4716	3588	109	149	295	90	87	0	2523	2456	1822	109	127	136	85	80	0	0	0	0	0	0	0	0	0	0	0	0	0	0	0	0	0	0	0	1.754	1.963	2.025	2.001	2.185	2.035	0.876	0.000	0.000	0.000	0.000	0.000	0.000	0.000	0.000	0.000	0.000	0.000	0.000	0.000	0.000	80	518	6649	6954	0.811	Error	Error	4235	2414	0	0	4607	2347	0	0	0	0
3	14	8	""	"YOL048C"	13950	14650	110	9358	7751	3814	105	129	368	95	90	0	4631	3883	1991	106	129	378	83	81	0	0	0	0	0	0	0	0	0	0	0	0	0	0	0	0	0	0	0	2.045	2.024	2.031	2.261	1.994	2.031	0.908	0.000	0.000	0.000	0.000	0.000	0.000	0.000	0.000	0.000	0.000	0.000	0.000	0.000	0.000	80	491	13778	11423	1.032	Error	Error	9253	4525	0	0	7646	3777	0	0	0	0
3	15	8	"spr1"	"YOR190W"	14150	14660	120	3983	3390	1998	101	110	60	95	93	0	6920	5830	3724	108	114	39	94	91	0	0	0	0	0	0	0	0	0	0	0	0	0	0	0	0	0	0	0	0.570	0.575	0.579	0.654	2.854	0.543	0.885	0.000	0.000	0.000	0.000	0.000	0.000	0.000	0.000	0.000	0.000	0.000	0.000	0.000	0.000	120	583	10694	9011	-0.811	Error	Error	3882	6812	0	0	3289	5722	0	0	0	0
3	16	8	""	"YOR220W"	14330	14650	110	4394	3748	1563	106	239	692	90	85	0	7372	6454	3033	114	240	740	92	86	0	0	0	0	0	0	0	0	0	0	0	0	0	0	0	0	0	0	0	0.591	0.574	0.579	0.648	1.958	0.543	0.899	0.000	0.000	0.000	0.000	0.000	0.000	0.000	0.000	0.000	0.000	0.000	0.000	0.000	0.000	80	516	11546	9982	-0.759	Error	Error	4288	7258	0	0	3642	6340	0	0	0	0
3	17	8	""	"YOR252W"	14540	14660	110	3478	3039	2166	111	257	717	70	65	0	4690	3884	3038	118	255	765	70	65	0	0	0	0	0	0	0	0	0	0	0	0	0	0	0	0	0	0	0	0.736	0.777	0.771	0.868	2.460	0.740	0.889	0.000	0.000	0.000	0.000	0.000	0.000	0.000	0.000	0.000	0.000	0.000	0.000	0.000	0.000	80	485	7939	6694	-0.441	Error	Error	3367	4572	0	0	2928	3766	0	0	0	0
3	18	8	""	"YOR192C"	14710	14650	110	12882	12354	10002	113	122	58	100	100	0	8157	8569	7384	117	124	44	93	92	0	0	0	0	0	0	0	0	0	0	0	0	0	0	0	0	0	0	0	1.588	1.448	1.451	2.046	2.957	1.400	0.902	0.000	0.000	0.000	0.000	0.000	0.000	0.000	0.000	0.000	0.000	0.000	0.000	0.000	0.000	80	408	20809	20693	0.667	Error	Error	12769	8040	0	0	12241	8452	0	0	0	0
3	19	8	""	"YOR222W"	14890	14660	120	3770	3100	1830	108	126	138	93	87	0	6526	5316	3396	112	121	45	96	95	0	0	0	0	0	0	0	0	0	0	0	0	0	0	0	0	0	0	0	0.571	0.575	0.576	0.646	2.387	0.537	0.886	0.000	0.000	0.000	0.000	0.000	0.000	0.000	0.000	0.000	0.000	0.000	0.000	0.000	0.000	120	484	10076	8196	-0.809	Error	Error	3662	6414	0	0	2992	5204	0	0	0	0
3	20	8	"SEC63"	"YOR254C"	15070	14660	120	844	868	583	101	108	46	87	82	0	1298	1294	925	104	113	40	85	84	0	0	0	0	0	0	0	0	0	0	0	0	0	0	0	0	0	0	0	0.622	0.645	0.633	0.652	2.194	0.610	0.841	0.000	0.000	0.000	0.000	0.000	0.000	0.000	0.000	0.000	0.000	0.000	0.000	0.000	0.000	120	461	1937	1957	-0.684	Error	Error	743	1194	0	0	767	1190	0	0	0	0
3	21	8	""	"YOR192C-B"	15260	14660	120	3327	3287	2161	96	111	73	95	94	0	2225	2275	1690	102	110	41	87	85	0	0	0	0	0	0	0	0	0	0	0	0	0	0	0	0	0	0	0	1.522	1.468	1.482	1.778	2.636	1.416	0.867	0.000	0.000	0.000	0.000	0.000	0.000	0.000	0.000	0.000	0.000	0.000	0.000	0.000	0.000	120	525	5354	5364	0.606	Error	Error	3231	2123	0	0	3191	2173	0	0	0	0
3	22	8	"rpb8"	"YOR224C"	15460	14650	110	2515	2018	1111	100	112	71	93	92	0	5198	4122	2467	107	114	46	93	90	0	0	0	0	0	0	0	0	0	0	0	0	0	0	0	0	0	0	0	0.474	0.478	0.475	0.594	2.383	0.447	0.890	0.000	0.000	0.000	0.000	0.000	0.000	0.000	0.000	0.000	0.000	0.000	0.000	0.000	0.000	80	493	7506	5933	-1.076	Error	Error	2415	5091	0	0	1918	4015	0	0	0	0
3	1	9	""	"YOR256C"	11460	14850	120	3964	4314	2718	90	94	35	100	99	0	6969	7425	5406	99	105	34	100	99	0	0	0	0	0	0	0	0	0	0	0	0	0	0	0	0	0	0	0	0.564	0.577	0.587	0.713	2.039	0.514	0.904	0.000	0.000	0.000	0.000	0.000	0.000	0.000	0.000	0.000	0.000	0.000	0.000	0.000	0.000	120	546	10744	11550	-0.826	Error	Error	3874	6870	0	0	4224	7326	0	0	0	0
3	2	9	"TOA1"	"YOR194C"	11650	14840	110	4284	3522	2214	93	124	159	87	83	0	8436	6626	4386	105	167	420	80	78	0	0	0	0	0	0	0	0	0	0	0	0	0	0	0	0	0	0	0	0.503	0.526	0.530	0.600	2.150	0.494	0.915	0.000	0.000	0.000	0.000	0.000	0.000	0.000	0.000	0.000	0.000	0.000	0.000	0.000	0.000	80	493	12522	9950	-0.991	Error	Error	4191	8331	0	0	3429	6521	0	0	0	0
3	3	9	"ISU2"	"YOR226C"	11850	14860	110	1007	910	634	91	122	156	76	67	0	3295	2703	2096	103	169	432	71	65	0	0	0	0	0	0	0	0	0	0	0	0	0	0	0	0	0	0	0	0.287	0.315	0.317	0.376	2.007	0.296	0.871	0.000	0.000	0.000	0.000	0.000	0.000	0.000	0.000	0.000	0.000	0.000	0.000	0.000	0.000	80	466	4108	3419	-1.801	Error	Error	916	3192	0	0	819	2600	0	0	0	0
3	4	9	""	"YOR258W"	12030	14850	120	2166	1931	1272	93	98	38	95	85	0	3088	2709	2020	103	106	32	88	84	0	0	0	0	0	0	0	0	0	0	0	0	0	0	0	0	0	0	0	0.694	0.705	0.728	0.889	2.190	0.654	0.874	0.000	0.000	0.000	0.000	0.000	0.000	0.000	0.000	0.000	0.000	0.000	0.000	0.000	0.000	120	492	5058	4444	-0.526	Error	Error	2073	2985	0	0	1838	2606	0	0	0	0
3	5	9	"MRPL40"	"YPL173W"	12230	14840	110	8034	6852	3998	103	119	139	96	95	0	7532	6173	3798	107	145	350	87	82	0	0	0	0	0	0	0	0	0	0	0	0	0	0	0	0	0	0	0	1.068	1.113	1.164	1.438	2.424	1.078	0.912	0.000	0.000	0.000	0.000	0.000	0.000	0.000	0.000	0.000	0.000	0.000	0.000	0.000	0.000	80	494	15356	12815	0.095	Error	Error	7931	7425	0	0	6749	6066	0	0	0	0
3	6	9	"HRR25"	"YPL204W"	12420	14840	110	367	363	154	100	122	151	77	40	0	411	405	168	102	142	350	40	1	0	0	0	0	0	0	0	0	0	0	0	0	0	0	0	0	0	0	0	0.864	0.868	0.823	0.786	1.676	0.836	0.718	0.000	0.000	0.000	0.000	0.000	0.000	0.000	0.000	0.000	0.000	0.000	0.000	0.000	0.000	80	496	576	566	-0.211	Error	Error	267	309	0	0	263	303	0	0	0	0
3	7	9	""	"YPL236C"	12610	14840	110	3964	3890	1908	91	97	39	100	100	0	5413	5419	2890	98	107	56	98	98	0	0	0	0	0	0	0	0	0	0	0	0	0	0	0	0	0	0	0	0.729	0.714	0.736	0.791	1.766	0.673	0.903	0.000	0.000	0.000	0.000	0.000	0.000	0.000	0.000	0.000	0.000	0.000	0.000	0.000	0.000	80	468	9188	9120	-0.457	Error	Error	3873	5315	0	0	3799	5321	0	0	0	0
3	8	9	"spt14"	"YPL175W"	12790	14850	120	15287	12431	6442	100	137	301	98	97	0	8787	7148	4065	104	134	267	97	93	0	0	0	0	0	0	0	0	0	0	0	0	0	0	0	0	0	0	0	1.749	1.751	1.712	1.955	1.741	1.714	0.913	0.000	0.000	0.000	0.000	0.000	0.000	0.000	0.000	0.000	0.000	0.000	0.000	0.000	0.000	120	581	23870	19375	0.807	Error	Error	15187	8683	0	0	12331	7044	0	0	0	0
3	9	9	""	"YPL206C"	12980	14840	110	5536	4996	3254	104	146	238	95	87	0	10123	8722	5824	107	200	666	87	78	0	0	0	0	0	0	0	0	0	0	0	0	0	0	0	0	0	0	0	0.542	0.568	0.559	0.597	1.644	0.540	0.917	0.000	0.000	0.000	0.000	0.000	0.000	0.000	0.000	0.000	0.000	0.000	0.000	0.000	0.000	80	507	15448	13507	-0.883	Error	Error	5432	10016	0	0	4892	8615	0	0	0	0
3	10	9	""	"YPL238C"	13180	14840	110	2080	1705	973	101	154	272	78	77	0	3367	2593	1655	105	195	657	71	70	0	0	0	0	0	0	0	0	0	0	0	0	0	0	0	0	0	0	0	0.607	0.645	0.632	0.718	2.032	0.590	0.879	0.000	0.000	0.000	0.000	0.000	0.000	0.000	0.000	0.000	0.000	0.000	0.000	0.000	0.000	80	523	5241	4092	-0.721	Error	Error	1979	3262	0	0	1604	2488	0	0	0	0
3	11	9	"CUP9"	"YPL177C"	13360	14840	110	12636	12510	8273	103	112	65	100	100	0	3960	3544	2459	104	112	71	87	83	0	0	0	0	0	0	0	0	0	0	0	0	0	0	0	0	0	0	0	3.250	3.607	3.515	4.303	2.172	3.508	0.915	0.000	0.000	0.000	0.000	0.000	0.000	0.000	0.000	0.000	0.000	0.000	0.000	0.000	0.000	80	486	16389	15847	1.701	Error	Error	12533	3856	0	0	12407	3440	0	0	0	0
3	12	9	""	"YPL208W"	13560	14850	120	2542	2386	1154	102	126	191	95	89	0	7875	7037	3623	105	116	69	98	96	0	0	0	0	0	0	0	0	0	0	0	0	0	0	0	0	0	0	0	0.314	0.329	0.343	0.358	2.013	0.319	0.901	0.000	0.000	0.000	0.000	0.000	0.000	0.000	0.000	0.000	0.000	0.000	0.000	0.000	0.000	120	540	10210	9216	-1.671	Error	Error	2440	7770	0	0	2284	6932	0	0	0	0
3	13	9	"hsp82"	"YPL240C"	13730	14840	110	4844	5336	2906	107	231	868	95	87	0	5025	5146	2916	110	206	849	92	85	0	0	0	0	0	0	0	0	0	0	0	0	0	0	0	0	0	0	0	0.964	1.038	1.055	1.153	1.875	1.017	0.871	0.000	0.000	0.000	0.000	0.000	0.000	0.000	0.000	0.000	0.000	0.000	0.000	0.000	0.000	80	521	9652	10265	-0.053	Error	Error	4737	4915	0	0	5229	5036	0	0	0	0
3	14	9	"PPQ1"	"YPL179W"	13940	14850	110	9594	7769	4998	103	231	912	82	78	0	15243	11831	7899	109	210	896	81	76	0	0	0	0	0	0	0	0	0	0	0	0	0	0	0	0	0	0	0	0.627	0.654	0.655	0.821	2.303	0.619	0.904	0.000	0.000	0.000	0.000	0.000	0.000	0.000	0.000	0.000	0.000	0.000	0.000	0.000	0.000	80	546	24625	19388	-0.673	Error	Error	9491	15134	0	0	7666	11722	0	0	0	0
3	15	9	"SRP72"	"YPL210C"	14130	14840	110	1881	1968	1319	96	102	44	93	92	0	3958	3956	3034	105	111	44	91	87	0	0	0	0	0	0	0	0	0	0	0	0	0	0	0	0	0	0	0	0.463	0.486	0.502	0.575	2.631	0.433	0.860	0.000	0.000	0.000	0.000	0.000	0.000	0.000	0.000	0.000	0.000	0.000	0.000	0.000	0.000	80	496	5638	5723	-1.110	Error	Error	1785	3853	0	0	1872	3851	0	0	0	0
3	16	9	"IQG1"	"YPL242C"	14320	14840	110	1204	1358	827	95	105	69	100	98	0	929	1034	650	102	114	87	95	93	0	0	0	0	0	0	0	0	0	0	0	0	0	0	0	0	0	0	0	1.341	1.355	1.382	1.412	1.584	1.323	0.797	0.000	0.000	0.000	0.000	0.000	0.000	0.000	0.000	0.000	0.000	0.000	0.000	0.000	0.000	80	496	1936	2195	0.423	Error	Error	1109	827	0	0	1263	932	0	0	0	0
3	17	9	"EMPTY"	"EMPTY"	14510	14840	150	113	127	61	100	205	600	0	0	0	118	125	55	107	216	651	0	0	0	0	0	0	0	0	0	0	0	0	0	0	0	0	0	0	0	0	0	1.182	1.500	1.583	1.499	3.592	1.445	0.575	0.000	0.000	0.000	0.000	0.000	0.000	0.000	0.000	0.000	0.000	0.000	0.000	0.000	0.000	156	685	24	45	0.241	Error	Error	13	11	0	0	27	18	0	0	-75	0
3	18	9	"EMPTY"	"EMPTY"	14700	14840	150	110	128	73	103	116	99	12	3	0	112	136	83	109	128	186	5	1	0	0	0	0	0	0	0	0	0	0	0	0	0	0	0	0	0	0	0	2.333	0.926	0.935	0.892	3.829	0.710	0.198	0.000	0.000	0.000	0.000	0.000	0.000	0.000	0.000	0.000	0.000	0.000	0.000	0.000	0.000	156	597	10	52	1.222	Error	Error	7	3	0	0	25	27	0	0	-75	0
3	19	9	"EMPTY"	"EMPTY"	14890	14840	150	116	177	316	100	108	46	34	23	0	115	169	236	103	112	41	33	20	0	0	0	0	0	0	0	0	0	0	0	0	0	0	0	0	0	0	0	1.333	1.167	1.245	1.213	3.244	1.372	0.771	0.000	0.000	0.000	0.000	0.000	0.000	0.000	0.000	0.000	0.000	0.000	0.000	0.000	0.000	156	565	28	143	0.415	Error	Error	16	12	0	0	77	66	0	0	-75	0
3	20	9	"EMPTY"	"EMPTY"	15080	14840	150	111	133	97	100	104	43	31	16	0	104	136	106	101	110	40	28	16	0	0	0	0	0	0	0	0	0	0	0	0	0	0	0	0	0	0	0	3.667	0.943	1.167	1.178	4.682	0.919	0.319	0.000	0.000	0.000	0.000	0.000	0.000	0.000	0.000	0.000	0.000	0.000	0.000	0.000	0.000	156	541	14	68	1.874	Error	Error	11	3	0	0	33	35	0	0	-75	0
3	21	9	"EMPTY"	"EMPTY"	15270	14840	150	111	134	92	101	110	68	19	10	0	103	134	101	101	110	41	25	12	0	0	0	0	0	0	0	0	0	0	0	0	0	0	0	0	0	0	0	5.000	1.000	1.008	1.020	3.550	0.972	0.330	0.000	0.000	0.000	0.000	0.000	0.000	0.000	0.000	0.000	0.000	0.000	0.000	0.000	0.000	156	562	12	66	2.322	Error	Error	10	2	0	0	33	33	0	0	-75	0
3	22	9	"EMPTY"	"EMPTY"	15460	14840	150	108	129	76	98	109	73	18	7	0	110	137	101	99	108	47	25	10	0	0	0	0	0	0	0	0	0	0	0	0	0	0	0	0	0	0	0	0.909	0.816	1.429	1.362	3.796	0.869	0.118	0.000	0.000	0.000	0.000	0.000	0.000	0.000	0.000	0.000	0.000	0.000	0.000	0.000	0.000	156	826	21	69	-0.138	Error	Error	10	11	0	0	31	38	0	0	-75	0
3	1	10	"EMPTY"	"EMPTY"	11480	15030	150	91	106	59	84	88	33	30	14	0	99	122	75	93	97	29	30	18	0	0	0	0	0	0	0	0	0	0	0	0	0	0	0	0	0	0	0	1.167	0.759	1.171	1.078	4.387	0.761	0.158	0.000	0.000	0.000	0.000	0.000	0.000	0.000	0.000	0.000	0.000	0.000	0.000	0.000	0.000	156	787	13	51	0.222	Error	Error	7	6	0	0	22	29	0	0	-75	0
3	2	10	"EMPTY"	"EMPTY"	11670	15030	150	95	110	60	88	101	98	7	2	0	94	117	82	96	122	210	2	0	0	0	0	0	0	0	0	0	0	0	0	0	0	0	0	0	0	0	0	-3.500	1.048	1.097	1.032	3.198	0.276	0.368	0.000	0.000	0.000	0.000	0.000	0.000	0.000	0.000	0.000	0.000	0.000	0.000	0.000	0.000	156	631	5	43	Error	Error	Error	7	-2	0	0	22	21	0	0	-75	0
3	3	10	"EMPTY"	"EMPTY"	11860	15030	150	92	103	51	87	103	110	5	0	0	97	118	78	96	131	282	2	0	0	0	0	0	0	0	0	0	0	0	0	0	0	0	0	0	0	0	0	5.000	0.727	1.240	1.282	3.671	0.493	0.075	0.000	0.000	0.000	0.000	0.000	0.000	0.000	0.000	0.000	0.000	0.000	0.000	0.000	0.000	156	590	6	38	2.322	Error	Error	5	1	0	0	16	22	0	0	-75	0
3	4	10	"EMPTY"	"EMPTY"	12050	15030	150	95	111	64	87	95	47	23	9	0	102	122	72	99	104	43	19	9	0	0	0	0	0	0	0	0	0	0	0	0	0	0	0	0	0	0	0	2.667	1.043	0.961	1.075	3.937	0.992	0.235	0.000	0.000	0.000	0.000	0.000	0.000	0.000	0.000	0.000	0.000	0.000	0.000	0.000	0.000	156	572	11	47	1.415	Error	Error	8	3	0	0	24	23	0	0	-75	0
3	5	10	"EMPTY"	"EMPTY"	12240	15030	150	104	116	60	92	109	118	7	0	0	99	122	82	101	136	319	1	0	0	0	0	0	0	0	0	0	0	0	0	0	0	0	0	0	0	0	0	-6.000	1.143	1.100	1.195	3.715	0.118	0.058	0.000	0.000	0.000	0.000	0.000	0.000	0.000	0.000	0.000	0.000	0.000	0.000	0.000	0.000	156	603	10	45	Error	Error	Error	12	-2	0	0	24	21	0	0	-75	0
3	6	10	"EMPTY"	"EMPTY"	12430	15030	150	102	114	60	93	108	112	7	1	0	103	126	77	99	124	262	3	0	0	0	0	0	0	0	0	0	0	0	0	0	0	0	0	0	0	0	0	2.250	0.778	1.165	1.229	4.106	0.663	0.237	0.000	0.000	0.000	0.000	0.000	0.000	0.000	0.000	0.000	0.000	0.000	0.000	0.000	0.000	156	705	13	48	1.170	Error	Error	9	4	0	0	21	27	0	0	-75	0
3	7	10	""	"iYBL030C-0"	12640	15030	110	1294	1374	1112	90	158	431	71	56	0	4571	4808	4247	99	145	355	81	72	0	0	0	0	0	0	0	0	0	0	0	0	0	0	0	0	0	0	0	0.269	0.273	0.307	0.355	2.731	0.253	0.895	0.000	0.000	0.000	0.000	0.000	0.000	0.000	0.000	0.000	0.000	0.000	0.000	0.000	0.000	80	533	5676	5993	-1.893	Error	Error	1204	4472	0	0	1284	4709	0	0	0	0
3	8	10	""	"iYBL027W"	12840	15040	110	4950	4466	2914	94	165	446	90	85	0	6247	5781	4263	99	146	364	83	80	0	0	0	0	0	0	0	0	0	0	0	0	0	0	0	0	0	0	0	0.790	0.769	0.799	0.904	2.438	0.717	0.859	0.000	0.000	0.000	0.000	0.000	0.000	0.000	0.000	0.000	0.000	0.000	0.000	0.000	0.000	80	499	11004	10054	-0.340	Error	Error	4856	6148	0	0	4372	5682	0	0	0	0
3	9	10	""	"iYBL023C"	13020	15040	110	1950	1705	907	95	102	65	97	93	0	3135	2618	1525	100	117	260	86	78	0	0	0	0	0	0	0	0	0	0	0	0	0	0	0	0	0	0	0	0.611	0.639	0.625	0.685	2.069	0.596	0.895	0.000	0.000	0.000	0.000	0.000	0.000	0.000	0.000	0.000	0.000	0.000	0.000	0.000	0.000	80	481	4890	4128	-0.710	Error	Error	1855	3035	0	0	1610	2518	0	0	0	0
3	10	10	""	"iYBL009W"	13200	15040	120	3226	2947	1054	92	116	202	99	98	0	2288	2088	823	100	108	73	97	97	0	0	0	0	0	0	0	0	0	0	0	0	0	0	0	0	0	0	0	1.432	1.436	1.425	1.506	1.641	1.423	0.900	0.000	0.000	0.000	0.000	0.000	0.000	0.000	0.000	0.000	0.000	0.000	0.000	0.000	0.000	120	580	5322	4843	0.518	Error	Error	3134	2188	0	0	2855	1988	0	0	0	0
3	11	10	""	"iYBL005W"	13400	15030	110	4033	3780	1873	93	148	329	96	87	0	4101	3714	1883	98	114	109	96	93	0	0	0	0	0	0	0	0	0	0	0	0	0	0	0	0	0	0	0	0.984	1.020	1.079	1.115	1.649	1.002	0.886	0.000	0.000	0.000	0.000	0.000	0.000	0.000	0.000	0.000	0.000	0.000	0.000	0.000	0.000	80	546	7943	7303	-0.023	Error	Error	3940	4003	0	0	3687	3616	0	0	0	0
3	12	10	""	"iYBL003C"	13610	15030	110	2503	2521	1861	91	144	305	81	76	0	1317	1274	882	101	116	105	80	78	0	0	0	0	0	0	0	0	0	0	0	0	0	0	0	0	0	0	0	1.984	2.072	2.167	2.140	2.463	2.167	0.881	0.000	0.000	0.000	0.000	0.000	0.000	0.000	0.000	0.000	0.000	0.000	0.000	0.000	0.000	80	522	3628	3603	0.988	Error	Error	2412	1216	0	0	2430	1173	0	0	0	0
3	13	10	""	"iYBRCdelta11"	13790	15030	90	170	184	90	94	101	40	67	48	0	200	210	120	98	103	34	76	63	0	0	0	0	0	0	0	0	0	0	0	0	0	0	0	0	0	0	0	0.745	0.804	0.735	0.704	2.764	0.687	0.371	0.000	0.000	0.000	0.000	0.000	0.000	0.000	0.000	0.000	0.000	0.000	0.000	0.000	0.000	52	377	178	202	-0.424	Error	Error	76	102	0	0	90	112	0	0	0	0
3	14	10	""	"iYBR014C"	13960	15030	110	4695	4255	2941	94	103	58	98	93	0	2548	2177	1629	98	106	47	83	81	0	0	0	0	0	0	0	0	0	0	0	0	0	0	0	0	0	0	0	1.878	2.001	1.952	2.284	2.334	1.962	0.901	0.000	0.000	0.000	0.000	0.000	0.000	0.000	0.000	0.000	0.000	0.000	0.000	0.000	0.000	80	512	7051	6240	0.909	Error	Error	4601	2450	0	0	4161	2079	0	0	0	0
3	15	10	""	"iYBR018C"	14160	15040	120	2198	2175	1358	95	101	46	99	95	0	3070	3152	2245	95	104	48	90	87	0	0	0	0	0	0	0	0	0	0	0	0	0	0	0	0	0	0	0	0.707	0.680	0.651	0.849	2.869	0.625	0.864	0.000	0.000	0.000	0.000	0.000	0.000	0.000	0.000	0.000	0.000	0.000	0.000	0.000	0.000	120	586	5078	5137	-0.500	Error	Error	2103	2975	0	0	2080	3057	0	0	0	0
3	16	10	""	"iYBR035C"	14340	15030	110	1894	1721	890	92	99	50	97	93	0	4788	4129	2352	97	106	64	98	97	0	0	0	0	0	0	0	0	0	0	0	0	0	0	0	0	0	0	0	0.384	0.404	0.407	0.443	1.884	0.375	0.889	0.000	0.000	0.000	0.000	0.000	0.000	0.000	0.000	0.000	0.000	0.000	0.000	0.000	0.000	80	496	6493	5661	-1.380	Error	Error	1802	4691	0	0	1629	4032	0	0	0	0
3	17	10	""	"iYBR038W"	14520	15030	110	2235	2500	1847	97	139	286	88	80	0	1970	2259	1788	105	159	348	85	72	0	0	0	0	0	0	0	0	0	0	0	0	0	0	0	0	0	0	0	1.146	1.116	1.052	1.273	2.060	1.046	0.879	0.000	0.000	0.000	0.000	0.000	0.000	0.000	0.000	0.000	0.000	0.000	0.000	0.000	0.000	80	516	4003	4557	0.197	Error	Error	2138	1865	0	0	2403	2154	0	0	0	0
3	18	10	""	"iYBR042C"	14730	15030	110	2140	1995	1166	100	134	245	85	78	0	1520	1297	721	103	151	309	80	76	0	0	0	0	0	0	0	0	0	0	0	0	0	0	0	0	0	0	0	1.440	1.587	1.572	1.575	2.072	1.631	0.872	0.000	0.000	0.000	0.000	0.000	0.000	0.000	0.000	0.000	0.000	0.000	0.000	0.000	0.000	80	536	3457	3089	0.526	Error	Error	2040	1417	0	0	1895	1194	0	0	0	0
3	19	10	""	"iYCR018C"	14930	15020	80	192	206	100	96	102	41	69	53	0	200	207	97	100	110	41	78	55	0	0	0	0	0	0	0	0	0	0	0	0	0	0	0	0	0	0	0	0.960	1.028	0.911	0.808	2.531	1.081	0.411	0.000	0.000	0.000	0.000	0.000	0.000	0.000	0.000	0.000	0.000	0.000	0.000	0.000	0.000	52	321	196	217	-0.059	Error	Error	96	100	0	0	110	107	0	0	0	0
3	20	10	""	"iYCRCtau1"	15130	15030	110	361	434	369	104	116	89	88	58	0	452	555	694	102	116	96	80	70	0	0	0	0	0	0	0	0	0	0	0	0	0	0	0	0	0	0	0	0.734	0.728	0.821	0.797	2.081	0.548	0.616	0.000	0.000	0.000	0.000	0.000	0.000	0.000	0.000	0.000	0.000	0.000	0.000	0.000	0.000	80	500	607	783	-0.446	Error	Error	257	350	0	0	330	453	0	0	0	0
3	21	10	""	"iYCR020C"	15300	15030	110	2595	2255	1080	101	110	50	100	100	0	1812	1515	762	102	111	42	92	91	0	0	0	0	0	0	0	0	0	0	0	0	0	0	0	0	0	0	0	1.458	1.524	1.540	1.611	2.076	1.492	0.852	0.000	0.000	0.000	0.000	0.000	0.000	0.000	0.000	0.000	0.000	0.000	0.000	0.000	0.000	80	483	4204	3567	0.544	Error	Error	2494	1710	0	0	2154	1413	0	0	0	0
3	22	10	""	"iSNR65"	15500	15040	110	1079	961	503	98	102	43	90	87	0	2237	1818	1075	101	108	41	82	82	0	0	0	0	0	0	0	0	0	0	0	0	0	0	0	0	0	0	0	0.459	0.503	0.531	0.563	2.061	0.465	0.847	0.000	0.000	0.000	0.000	0.000	0.000	0.000	0.000	0.000	0.000	0.000	0.000	0.000	0.000	80	524	3117	2580	-1.123	Error	Error	981	2136	0	0	863	1717	0	0	0	0
3	1	11	""	"iYCR033W"	11500	15220	110	1662	1815	1130	83	87	36	98	96	0	1191	1204	756	91	94	27	90	88	0	0	0	0	0	0	0	0	0	0	0	0	0	0	0	0	0	0	0	1.435	1.556	1.581	1.628	1.923	1.551	0.876	0.000	0.000	0.000	0.000	0.000	0.000	0.000	0.000	0.000	0.000	0.000	0.000	0.000	0.000	80	539	2679	2845	0.522	Error	Error	1579	1100	0	0	1732	1113	0	0	0	0
3	2	11	""	"iYCR037C"	11700	15230	110	2481	2207	1242	84	92	53	98	97	0	5727	5041	3162	92	98	35	96	95	0	0	0	0	0	0	0	0	0	0	0	0	0	0	0	0	0	0	0	0.425	0.429	0.436	0.483	1.924	0.386	0.878	0.000	0.000	0.000	0.000	0.000	0.000	0.000	0.000	0.000	0.000	0.000	0.000	0.000	0.000	80	513	8032	7072	-1.233	Error	Error	2397	5635	0	0	2123	4949	0	0	0	0
3	3	11	""	"iYCR060W"	11890	15220	110	1281	1215	868	86	98	85	86	77	0	5242	4959	4169	96	100	32	88	83	0	0	0	0	0	0	0	0	0	0	0	0	0	0	0	0	0	0	0	0.232	0.232	0.250	0.338	3.509	0.204	0.865	0.000	0.000	0.000	0.000	0.000	0.000	0.000	0.000	0.000	0.000	0.000	0.000	0.000	0.000	80	501	6341	5992	-2.106	Error	Error	1195	5146	0	0	1129	4863	0	0	0	0
3	4	11	""	"iYCR066W"	12080	15220	110	5077	4494	2696	87	99	81	92	91	0	1247	1078	613	96	100	31	85	82	0	0	0	0	0	0	0	0	0	0	0	0	0	0	0	0	0	0	0	4.335	4.488	4.743	4.390	1.572	4.871	0.868	0.000	0.000	0.000	0.000	0.000	0.000	0.000	0.000	0.000	0.000	0.000	0.000	0.000	0.000	80	472	6141	5389	2.116	Error	Error	4990	1151	0	0	4407	982	0	0	0	0
3	5	11	""	"iYCR071C"	12260	15230	120	4876	4609	2874	89	99	44	100	98	0	1756	1689	1181	98	107	94	81	78	0	0	0	0	0	0	0	0	0	0	0	0	0	0	0	0	0	0	0	2.887	2.841	2.865	3.643	2.352	2.754	0.907	0.000	0.000	0.000	0.000	0.000	0.000	0.000	0.000	0.000	0.000	0.000	0.000	0.000	0.000	120	508	6445	6111	1.530	Error	Error	4787	1658	0	0	4520	1591	0	0	0	0
3	6	11	""	"iYCR090C-1"	12450	15230	120	5084	4413	2571	92	105	106	100	97	0	7379	6231	4317	97	120	314	88	81	0	0	0	0	0	0	0	0	0	0	0	0	0	0	0	0	0	0	0	0.686	0.704	0.688	0.952	2.688	0.636	0.894	0.000	0.000	0.000	0.000	0.000	0.000	0.000	0.000	0.000	0.000	0.000	0.000	0.000	0.000	120	545	12274	10455	-0.545	Error	Error	4992	7282	0	0	4321	6134	0	0	0	0
3	7	11	""	"iYCR094W"	12650	15220	110	3124	2680	1603	92	98	50	93	93	0	1811	1502	908	96	104	104	81	78	0	0	0	0	0	0	0	0	0	0	0	0	0	0	0	0	0	0	0	1.768	1.841	1.864	2.008	1.919	1.882	0.899	0.000	0.000	0.000	0.000	0.000	0.000	0.000	0.000	0.000	0.000	0.000	0.000	0.000	0.000	80	509	4747	3994	0.822	Error	Error	3032	1715	0	0	2588	1406	0	0	0	0
3	8	11	""	"iYCRWomega3"	12840	15230	120	2784	3342	2975	95	128	300	86	83	0	1425	1728	1553	94	121	244	75	71	0	0	0	0	0	0	0	0	0	0	0	0	0	0	0	0	0	0	0	2.020	1.987	2.046	2.488	3.107	2.014	0.883	0.000	0.000	0.000	0.000	0.000	0.000	0.000	0.000	0.000	0.000	0.000	0.000	0.000	0.000	120	555	4020	4881	1.015	Error	Error	2689	1331	0	0	3247	1634	0	0	0	0
3	9	11	""	"iYDR036C"	13030	15230	120	2557	2409	1265	93	134	365	89	85	0	5009	4473	2554	97	142	448	89	82	0	0	0	0	0	0	0	0	0	0	0	0	0	0	0	0	0	0	0	0.502	0.529	0.549	0.636	2.039	0.499	0.904	0.000	0.000	0.000	0.000	0.000	0.000	0.000	0.000	0.000	0.000	0.000	0.000	0.000	0.000	120	561	7376	6692	-0.995	Error	Error	2464	4912	0	0	2316	4376	0	0	0	0
3	10	11	""	"iYDR040C"	13220	15220	110	1814	1901	1597	89	98	72	96	88	0	2148	2483	2229	97	99	26	91	91	0	0	0	0	0	0	0	0	0	0	0	0	0	0	0	0	0	0	0	0.841	0.759	0.815	0.877	2.328	0.692	0.788	0.000	0.000	0.000	0.000	0.000	0.000	0.000	0.000	0.000	0.000	0.000	0.000	0.000	0.000	80	491	3776	4198	-0.250	Error	Error	1725	2051	0	0	1812	2386	0	0	0	0
3	11	11	""	"iYDR043C-0"	13420	15220	110	693	739	420	89	98	82	95	88	0	1739	1915	1195	93	97	26	95	95	0	0	0	0	0	0	0	0	0	0	0	0	0	0	0	0	0	0	0	0.367	0.357	0.378	0.374	1.897	0.339	0.869	0.000	0.000	0.000	0.000	0.000	0.000	0.000	0.000	0.000	0.000	0.000	0.000	0.000	0.000	80	524	2250	2472	-1.446	Error	Error	604	1646	0	0	650	1822	0	0	0	0
3	12	11	""	"itD(GUC)D"	13600	15220	110	849	766	332	87	103	127	90	81	0	1226	1080	517	95	100	55	95	91	0	0	0	0	0	0	0	0	0	0	0	0	0	0	0	0	0	0	0	0.674	0.689	0.702	0.709	1.664	0.641	0.854	0.000	0.000	0.000	0.000	0.000	0.000	0.000	0.000	0.000	0.000	0.000	0.000	0.000	0.000	80	514	1893	1664	-0.570	Error	Error	762	1131	0	0	679	985	0	0	0	0
3	13	11	""	"iYDR062W"	13790	15220	110	1580	1457	770	91	95	36	98	97	0	2996	2685	1445	96	100	33	95	95	0	0	0	0	0	0	0	0	0	0	0	0	0	0	0	0	0	0	0	0.513	0.528	0.527	0.537	1.702	0.510	0.889	0.000	0.000	0.000	0.000	0.000	0.000	0.000	0.000	0.000	0.000	0.000	0.000	0.000	0.000	80	538	4389	3955	-0.962	Error	Error	1489	2900	0	0	1366	2589	0	0	0	0
3	14	11	""	"iYDR066C"	13980	15230	100	1735	1970	1382	92	98	42	96	91	0	938	923	661	93	101	49	87	83	0	0	0	0	0	0	0	0	0	0	0	0	0	0	0	0	0	0	0	1.944	2.263	2.150	2.159	1.645	2.246	0.904	0.000	0.000	0.000	0.000	0.000	0.000	0.000	0.000	0.000	0.000	0.000	0.000	0.000	0.000	80	488	2488	2708	0.959	Error	Error	1643	845	0	0	1878	830	0	0	0	0
3	15	11	""	"iYDR082W"	14180	15220	110	575	545	348	90	97	41	85	73	0	657	545	339	92	99	48	80	73	0	0	0	0	0	0	0	0	0	0	0	0	0	0	0	0	0	0	0	0.858	1.004	0.906	0.811	2.065	1.005	0.800	0.000	0.000	0.000	0.000	0.000	0.000	0.000	0.000	0.000	0.000	0.000	0.000	0.000	0.000	80	496	1050	908	-0.220	Error	Error	485	565	0	0	455	453	0	0	0	0
3	16	11	""	"iYDR086C"	14360	15230	110	1500	1314	507	91	100	66	98	93	0	3213	2716	1207	97	103	35	95	93	0	0	0	0	0	0	0	0	0	0	0	0	0	0	0	0	0	0	0	0.452	0.467	0.480	0.552	2.244	0.437	0.886	0.000	0.000	0.000	0.000	0.000	0.000	0.000	0.000	0.000	0.000	0.000	0.000	0.000	0.000	80	515	4525	3842	-1.145	Error	Error	1409	3116	0	0	1223	2619	0	0	0	0
3	17	11	""	"itR(ACG)D-1"	14560	15230	110	1716	1686	737	93	117	170	95	88	0	4239	4034	2155	104	128	196	92	90	0	0	0	0	0	0	0	0	0	0	0	0	0	0	0	0	0	0	0	0.393	0.405	0.424	0.501	2.499	0.362	0.874	0.000	0.000	0.000	0.000	0.000	0.000	0.000	0.000	0.000	0.000	0.000	0.000	0.000	0.000	80	530	5758	5523	-1.349	Error	Error	1623	4135	0	0	1593	3930	0	0	0	0
3	18	11	""	"iYDR102C"	14740	15220	110	926	819	422	91	103	53	96	90	0	2293	2039	1073	104	112	58	92	92	0	0	0	0	0	0	0	0	0	0	0	0	0	0	0	0	0	0	0	0.381	0.376	0.406	0.397	2.295	0.355	0.852	0.000	0.000	0.000	0.000	0.000	0.000	0.000	0.000	0.000	0.000	0.000	0.000	0.000	0.000	80	507	3024	2663	-1.390	Error	Error	835	2189	0	0	728	1935	0	0	0	0
3	19	11	""	"iYDRCsigma2"	14930	15230	110	684	612	330	95	114	143	80	70	0	753	647	363	103	115	102	80	76	0	0	0	0	0	0	0	0	0	0	0	0	0	0	0	0	0	0	0	0.906	0.950	0.923	0.907	1.508	0.904	0.822	0.000	0.000	0.000	0.000	0.000	0.000	0.000	0.000	0.000	0.000	0.000	0.000	0.000	0.000	80	549	1239	1061	-0.142	Error	Error	589	650	0	0	517	544	0	0	0	0
3	20	11	""	"iYDR109C"	15120	15230	110	2864	2878	1482	106	135	164	95	91	0	5251	4874	2711	108	125	107	92	92	0	0	0	0	0	0	0	0	0	0	0	0	0	0	0	0	0	0	0	0.536	0.582	0.606	0.711	2.197	0.542	0.892	0.000	0.000	0.000	0.000	0.000	0.000	0.000	0.000	0.000	0.000	0.000	0.000	0.000	0.000	80	519	7901	7538	-0.899	Error	Error	2758	5143	0	0	2772	4766	0	0	0	0
3	21	11	""	"iYDR418W"	15320	15220	100	206	282	207	108	117	53	68	47	0	318	523	537	105	116	51	72	67	0	0	0	0	0	0	0	0	0	0	0	0	0	0	0	0	0	0	0	0.460	0.416	0.413	0.464	2.611	0.369	0.746	0.000	0.000	0.000	0.000	0.000	0.000	0.000	0.000	0.000	0.000	0.000	0.000	0.000	0.000	80	440	311	592	-1.120	Error	Error	98	213	0	0	174	418	0	0	0	0
3	22	11	""	"iYDR421W"	15480	15220	110	4791	6519	6448	101	161	522	77	72	0	933	1199	1154	102	140	255	63	62	0	0	0	0	0	0	0	0	0	0	0	0	0	0	0	0	0	0	0	5.644	5.851	5.572	4.523	2.344	6.057	0.839	0.000	0.000	0.000	0.000	0.000	0.000	0.000	0.000	0.000	0.000	0.000	0.000	0.000	0.000	80	515	5521	7515	2.497	Error	Error	4690	831	0	0	6418	1097	0	0	0	0
3	1	12	""	"iYDR426C"	11480	15410	110	335	359	251	87	93	46	70	63	0	345	393	329	93	103	65	60	56	0	0	0	0	0	0	0	0	0	0	0	0	0	0	0	0	0	0	0	0.984	0.907	0.841	0.729	2.841	0.781	0.810	0.000	0.000	0.000	0.000	0.000	0.000	0.000	0.000	0.000	0.000	0.000	0.000	0.000	0.000	80	541	500	572	-0.023	Error	Error	248	252	0	0	272	300	0	0	0	0
3	2	12	""	"itK(CUU)D2"	11670	15410	110	854	745	415	88	100	84	83	77	0	561	470	318	97	114	88	68	66	0	0	0	0	0	0	0	0	0	0	0	0	0	0	0	0	0	0	0	1.651	1.761	1.525	1.640	2.345	1.633	0.810	0.000	0.000	0.000	0.000	0.000	0.000	0.000	0.000	0.000	0.000	0.000	0.000	0.000	0.000	80	502	1230	1030	0.723	Error	Error	766	464	0	0	657	373	0	0	0	0
3	3	12	""	"iYDR448W"	11860	15410	110	783	719	463	88	109	111	78	71	0	1083	883	643	99	126	146	67	63	0	0	0	0	0	0	0	0	0	0	0	0	0	0	0	0	0	0	0	0.706	0.805	0.789	0.823	1.883	0.748	0.851	0.000	0.000	0.000	0.000	0.000	0.000	0.000	0.000	0.000	0.000	0.000	0.000	0.000	0.000	80	502	1679	1415	-0.502	Error	Error	695	984	0	0	631	784	0	0	0	0
3	4	12	""	"iYDR452W"	12040	15410	110	1172	941	631	90	109	108	78	72	0	1243	965	723	99	125	150	65	62	0	0	0	0	0	0	0	0	0	0	0	0	0	0	0	0	0	0	0	0.946	0.983	0.941	0.942	2.094	0.873	0.863	0.000	0.000	0.000	0.000	0.000	0.000	0.000	0.000	0.000	0.000	0.000	0.000	0.000	0.000	80	532	2226	1717	-0.080	Error	Error	1082	1144	0	0	851	866	0	0	0	0
3	5	12	""	"iYDR470C"	12240	15410	110	983	993	703	92	114	137	80	75	0	2547	2317	1784	103	168	401	72	67	0	0	0	0	0	0	0	0	0	0	0	0	0	0	0	0	0	0	0	0.365	0.407	0.422	0.556	2.733	0.370	0.853	0.000	0.000	0.000	0.000	0.000	0.000	0.000	0.000	0.000	0.000	0.000	0.000	0.000	0.000	80	496	3335	3115	-1.456	Error	Error	891	2444	0	0	901	2214	0	0	0	0
3	6	12	""	"iYDR473C-0"	12420	15410	110	3365	3359	2513	92	167	416	78	72	0	4426	3992	3192	104	272	862	67	62	0	0	0	0	0	0	0	0	0	0	0	0	0	0	0	0	0	0	0	0.757	0.840	0.837	1.171	2.907	0.762	0.884	0.000	0.000	0.000	0.000	0.000	0.000	0.000	0.000	0.000	0.000	0.000	0.000	0.000	0.000	80	483	7595	7155	-0.401	Error	Error	3273	4322	0	0	3267	3888	0	0	0	0
3	7	12	""	"iYDR476C"	12620	15410	110	2711	2561	1645	99	148	354	85	75	0	6760	5561	3884	101	212	734	82	75	0	0	0	0	0	0	0	0	0	0	0	0	0	0	0	0	0	0	0	0.392	0.451	0.453	0.582	2.711	0.420	0.889	0.000	0.000	0.000	0.000	0.000	0.000	0.000	0.000	0.000	0.000	0.000	0.000	0.000	0.000	80	512	9271	7922	-1.350	Error	Error	2612	6659	0	0	2462	5460	0	0	0	0
3	8	12	""	"iYDR494W"	12800	15410	110	8513	7246	4742	101	298	961	83	77	0	1728	1514	1114	100	222	604	65	53	0	0	0	0	0	0	0	0	0	0	0	0	0	0	0	0	0	0	0	5.167	5.053	4.982	6.248	2.072	4.750	0.888	0.000	0.000	0.000	0.000	0.000	0.000	0.000	0.000	0.000	0.000	0.000	0.000	0.000	0.000	80	493	10040	8559	2.369	Error	Error	8412	1628	0	0	7145	1414	0	0	0	0
3	9	12	""	"iYDR498C"	13010	15420	110	3576	3395	2692	96	272	900	67	61	0	4536	4183	3562	97	208	617	65	61	0	0	0	0	0	0	0	0	0	0	0	0	0	0	0	0	0	0	0	0.784	0.807	0.874	1.063	2.548	0.764	0.902	0.000	0.000	0.000	0.000	0.000	0.000	0.000	0.000	0.000	0.000	0.000	0.000	0.000	0.000	80	530	7919	7385	-0.351	Error	Error	3480	4439	0	0	3299	4086	0	0	0	0
3	10	12	""	"iYDR502C"	13210	15410	110	226	230	123	88	95	66	67	52	0	260	241	137	96	99	31	73	70	0	0	0	0	0	0	0	0	0	0	0	0	0	0	0	0	0	0	0	0.841	0.979	0.882	0.807	2.213	0.931	0.557	0.000	0.000	0.000	0.000	0.000	0.000	0.000	0.000	0.000	0.000	0.000	0.000	0.000	0.000	80	507	302	287	-0.249	Error	Error	138	164	0	0	142	145	0	0	0	0
3	11	12	""	"itV(AAC)E1"	13390	15420	120	2169	1974	1129	91	97	43	98	95	0	5829	5039	2815	95	100	41	99	99	0	0	0	0	0	0	0	0	0	0	0	0	0	0	0	0	0	0	0	0.362	0.381	0.391	0.389	1.829	0.375	0.887	0.000	0.000	0.000	0.000	0.000	0.000	0.000	0.000	0.000	0.000	0.000	0.000	0.000	0.000	120	534	7812	6827	-1.464	Error	Error	2078	5734	0	0	1883	4944	0	0	0	0
3	12	12	""	"itI(AAU)E1"	13570	15420	120	406	376	208	92	99	41	80	75	0	315	288	178	96	99	25	72	69	0	0	0	0	0	0	0	0	0	0	0	0	0	0	0	0	0	0	0	1.434	1.479	1.263	1.310	2.375	1.389	0.698	0.000	0.000	0.000	0.000	0.000	0.000	0.000	0.000	0.000	0.000	0.000	0.000	0.000	0.000	120	512	533	476	0.520	Error	Error	314	219	0	0	284	192	0	0	0	0
3	13	12	""	"iYERCdelta20"	13750	15420	120	4354	3602	2168	93	98	37	97	95	0	2726	2162	1497	98	102	29	85	82	0	0	0	0	0	0	0	0	0	0	0	0	0	0	0	0	0	0	0	1.621	1.700	1.704	2.141	2.382	1.664	0.880	0.000	0.000	0.000	0.000	0.000	0.000	0.000	0.000	0.000	0.000	0.000	0.000	0.000	0.000	120	525	6889	5573	0.697	Error	Error	4261	2628	0	0	3509	2064	0	0	0	0
3	14	12	""	"iYER153C"	13930	15410	110	1019	994	812	93	115	134	67	60	0	859	803	683	98	127	166	60	58	0	0	0	0	0	0	0	0	0	0	0	0	0	0	0	0	0	0	0	1.217	1.278	1.204	1.064	2.338	1.192	0.877	0.000	0.000	0.000	0.000	0.000	0.000	0.000	0.000	0.000	0.000	0.000	0.000	0.000	0.000	80	491	1687	1606	0.283	Error	Error	926	761	0	0	901	705	0	0	0	0
3	15	12	""	"iYER157W"	14130	15410	110	2105	1654	1076	94	113	115	87	81	0	608	539	368	95	122	153	65	60	0	0	0	0	0	0	0	0	0	0	0	0	0	0	0	0	0	0	0	3.920	3.514	3.316	3.353	1.859	3.369	0.837	0.000	0.000	0.000	0.000	0.000	0.000	0.000	0.000	0.000	0.000	0.000	0.000	0.000	0.000	80	500	2524	2004	1.971	Error	Error	2011	513	0	0	1560	444	0	0	0	0
3	16	12	""	"iYER159C"	14310	15410	120	692	761	549	94	128	169	77	69	0	852	942	768	96	139	245	72	62	0	0	0	0	0	0	0	0	0	0	0	0	0	0	0	0	0	0	0	0.791	0.788	0.766	0.894	2.218	0.708	0.861	0.000	0.000	0.000	0.000	0.000	0.000	0.000	0.000	0.000	0.000	0.000	0.000	0.000	0.000	120	565	1354	1513	-0.338	Error	Error	598	756	0	0	667	846	0	0	0	0
3	17	12	""	"iYER174C"	14530	15420	110	823	859	731	98	137	182	67	60	0	1299	1306	1229	101	154	266	62	58	0	0	0	0	0	0	0	0	0	0	0	0	0	0	0	0	0	0	0	0.605	0.632	0.636	0.656	2.917	0.583	0.849	0.000	0.000	0.000	0.000	0.000	0.000	0.000	0.000	0.000	0.000	0.000	0.000	0.000	0.000	80	486	1923	1966	-0.725	Error	Error	725	1198	0	0	761	1205	0	0	0	0
3	18	12	""	"iYER178W"	14690	15410	120	3742	3651	2897	96	103	46	94	90	0	1195	1193	980	105	116	63	78	72	0	0	0	0	0	0	0	0	0	0	0	0	0	0	0	0	0	0	0	3.345	3.267	3.347	3.688	2.389	3.207	0.851	0.000	0.000	0.000	0.000	0.000	0.000	0.000	0.000	0.000	0.000	0.000	0.000	0.000	0.000	120	498	4736	4643	1.742	Error	Error	3646	1090	0	0	3555	1088	0	0	0	0
3	19	12	""	"iYER181C"	14870	15410	110	1721	1695	1315	102	366	2832	26	0	0	2825	3105	2642	108	218	693	65	60	0	0	0	0	0	0	0	0	0	0	0	0	0	0	0	0	0	0	0	0.596	0.532	0.531	0.561	2.399	0.473	0.877	0.000	0.000	0.000	0.000	0.000	0.000	0.000	0.000	0.000	0.000	0.000	0.000	0.000	0.000	80	497	4336	4590	-0.747	Error	Error	1619	2717	0	0	1593	2997	0	0	0	0
3	20	12	""	"iYFL064C"	15080	15410	130	65535	47485	25330	116	352	2614	89	85	53	26227	23156	15944	112	213	640	89	84	0	0	0	0	0	0	0	0	0	0	0	0	0	0	0	0	0	0	0	2.505	2.056	2.177	2.562	2.073	2.051	0.801	0.000	0.000	0.000	0.000	0.000	0.000	0.000	0.000	0.000	0.000	0.000	0.000	0.000	0.000	120	584	91534	70413	1.325	Error	Error	65419	26115	0	0	47369	23044	0	0	0	0
3	21	12	""	"iYFL061W"	15270	15410	120	1127	1012	618	116	139	165	82	72	0	1738	1432	922	110	144	241	75	70	0	0	0	0	0	0	0	0	0	0	0	0	0	0	0	0	0	0	0	0.621	0.678	0.659	0.719	2.034	0.655	0.840	0.000	0.000	0.000	0.000	0.000	0.000	0.000	0.000	0.000	0.000	0.000	0.000	0.000	0.000	120	521	2639	2218	-0.687	Error	Error	1011	1628	0	0	896	1322	0	0	0	0
3	22	12	""	"iYFL056C-0"	15430	15410	110	1780	1495	928	104	139	220	78	73	0	4030	3307	2238	101	225	701	70	70	0	0	0	0	0	0	0	0	0	0	0	0	0	0	0	0	0	0	0	0.427	0.434	0.440	0.517	2.680	0.402	0.904	0.000	0.000	0.000	0.000	0.000	0.000	0.000	0.000	0.000	0.000	0.000	0.000	0.000	0.000	80	498	5605	4597	-1.229	Error	Error	1676	3929	0	0	1391	3206	0	0	0	0
3	1	13	""	"iYGL100W"	11500	15590	110	909	838	343	92	97	48	97	96	0	2100	1831	871	96	106	68	91	90	0	0	0	0	0	0	0	0	0	0	0	0	0	0	0	0	0	0	0	0.408	0.430	0.428	0.505	2.072	0.406	0.863	0.000	0.000	0.000	0.000	0.000	0.000	0.000	0.000	0.000	0.000	0.000	0.000	0.000	0.000	80	542	2821	2481	-1.294	Error	Error	817	2004	0	0	746	1735	0	0	0	0
3	2	13	""	"itH(GUG)G2"	11690	15600	120	3774	3204	1597	95	106	75	98	95	0	2893	2595	1248	101	115	75	91	91	0	0	0	0	0	0	0	0	0	0	0	0	0	0	0	0	0	0	0	1.318	1.247	1.303	1.272	1.883	1.282	0.906	0.000	0.000	0.000	0.000	0.000	0.000	0.000	0.000	0.000	0.000	0.000	0.000	0.000	0.000	120	565	6471	5603	0.398	Error	Error	3679	2792	0	0	3109	2494	0	0	0	0
3	3	13	""	"iYGL096W-0"	11880	15600	120	2577	2222	1038	95	120	147	91	89	0	2414	2137	1037	104	124	134	89	86	0	0	0	0	0	0	0	0	0	0	0	0	0	0	0	0	0	0	0	1.074	1.046	1.082	1.079	1.915	1.042	0.907	0.000	0.000	0.000	0.000	0.000	0.000	0.000	0.000	0.000	0.000	0.000	0.000	0.000	0.000	120	579	4792	4160	0.104	Error	Error	2482	2310	0	0	2127	2033	0	0	0	0
3	4	13	""	"iYGL083W"	12070	15600	110	3867	3165	1558	93	108	75	97	93	0	6202	4952	2651	105	115	80	93	91	0	0	0	0	0	0	0	0	0	0	0	0	0	0	0	0	0	0	0	0.619	0.634	0.644	0.731	1.903	0.594	0.895	0.000	0.000	0.000	0.000	0.000	0.000	0.000	0.000	0.000	0.000	0.000	0.000	0.000	0.000	80	495	9871	7919	-0.692	Error	Error	3774	6097	0	0	3072	4847	0	0	0	0
3	5	13	""	"iYGL079W"	12260	15600	110	3104	2504	1462	93	110	117	96	92	0	1155	943	558	105	133	248	76	70	0	0	0	0	0	0	0	0	0	0	0	0	0	0	0	0	0	0	0	2.868	2.877	2.819	3.048	1.848	2.821	0.841	0.000	0.000	0.000	0.000	0.000	0.000	0.000	0.000	0.000	0.000	0.000	0.000	0.000	0.000	80	492	4061	3249	1.520	Error	Error	3011	1050	0	0	2411	838	0	0	0	0
3	6	13	""	"iYGL075C"	12450	15600	120	723	692	361	92	139	343	73	41	0	2521	2225	1395	102	183	580	76	70	0	0	0	0	0	0	0	0	0	0	0	0	0	0	0	0	0	0	0	0.261	0.283	0.295	0.377	2.687	0.256	0.858	0.000	0.000	0.000	0.000	0.000	0.000	0.000	0.000	0.000	0.000	0.000	0.000	0.000	0.000	120	566	3050	2723	-1.939	Error	Error	631	2419	0	0	600	2123	0	0	0	0
3	7	13	""	"iYGL056C"	12640	15600	120	1419	1320	807	92	101	52	93	88	0	3011	2784	1857	100	116	140	82	78	0	0	0	0	0	0	0	0	0	0	0	0	0	0	0	0	0	0	0	0.456	0.458	0.494	0.548	2.493	0.425	0.823	0.000	0.000	0.000	0.000	0.000	0.000	0.000	0.000	0.000	0.000	0.000	0.000	0.000	0.000	120	526	4238	3912	-1.133	Error	Error	1327	2911	0	0	1228	2684	0	0	0	0
3	8	13	""	"iYGL053W"	12820	15600	120	1273	1241	859	88	165	661	62	45	0	1565	1520	1214	94	122	194	73	65	0	0	0	0	0	0	0	0	0	0	0	0	0	0	0	0	0	0	0	0.806	0.809	0.827	0.987	2.854	0.686	0.812	0.000	0.000	0.000	0.000	0.000	0.000	0.000	0.000	0.000	0.000	0.000	0.000	0.000	0.000	120	573	2656	2579	-0.312	Error	Error	1185	1471	0	0	1153	1426	0	0	0	0
3	9	13	""	"iYGL049C"	13030	15600	110	1163	1116	676	87	103	116	90	82	0	2476	2312	1462	95	108	104	88	87	0	0	0	0	0	0	0	0	0	0	0	0	0	0	0	0	0	0	0	0.452	0.464	0.482	0.525	2.446	0.440	0.873	0.000	0.000	0.000	0.000	0.000	0.000	0.000	0.000	0.000	0.000	0.000	0.000	0.000	0.000	80	499	3457	3246	-1.146	Error	Error	1076	2381	0	0	1029	2217	0	0	0	0
3	10	13	""	"iYGL036W"	13200	15600	110	830	867	627	90	96	46	82	81	0	340	334	220	96	103	38	71	68	0	0	0	0	0	0	0	0	0	0	0	0	0	0	0	0	0	0	0	3.033	3.265	2.916	2.516	2.234	3.127	0.734	0.000	0.000	0.000	0.000	0.000	0.000	0.000	0.000	0.000	0.000	0.000	0.000	0.000	0.000	80	504	984	1015	1.601	Error	Error	740	244	0	0	777	238	0	0	0	0
3	11	13	""	"iYGL033W"	13390	15600	110	3688	3141	1890	94	112	127	91	85	0	2977	2621	1693	96	130	244	82	77	0	0	0	0	0	0	0	0	0	0	0	0	0	0	0	0	0	0	0	1.247	1.207	1.212	1.390	2.124	1.124	0.888	0.000	0.000	0.000	0.000	0.000	0.000	0.000	0.000	0.000	0.000	0.000	0.000	0.000	0.000	80	496	6475	5572	0.319	Error	Error	3594	2881	0	0	3047	2525	0	0	0	0
3	12	13	""	"iYGL029W"	13580	15600	110	2624	2686	2097	96	113	125	88	81	0	788	752	597	99	132	242	60	56	0	0	0	0	0	0	0	0	0	0	0	0	0	0	0	0	0	0	0	3.669	3.966	3.906	3.795	2.561	3.884	0.857	0.000	0.000	0.000	0.000	0.000	0.000	0.000	0.000	0.000	0.000	0.000	0.000	0.000	0.000	80	515	3217	3243	1.875	Error	Error	2528	689	0	0	2590	653	0	0	0	0
3	13	13	""	"itT(UGU)G2"	13800	15600	120	603	577	431	92	103	90	66	62	0	713	588	462	95	122	225	60	53	0	0	0	0	0	0	0	0	0	0	0	0	0	0	0	0	0	0	0	0.827	0.984	0.928	0.922	2.031	0.972	0.801	0.000	0.000	0.000	0.000	0.000	0.000	0.000	0.000	0.000	0.000	0.000	0.000	0.000	0.000	120	573	1129	978	-0.274	Error	Error	511	618	0	0	485	493	0	0	0	0
3	14	13	""	"iYGR258C-1"	13990	15600	120	885	915	659	90	105	120	81	76	0	966	1113	920	94	118	151	75	71	0	0	0	0	0	0	0	0	0	0	0	0	0	0	0	0	0	0	0	0.912	0.810	0.866	0.870	2.129	0.728	0.780	0.000	0.000	0.000	0.000	0.000	0.000	0.000	0.000	0.000	0.000	0.000	0.000	0.000	0.000	120	546	1667	1844	-0.133	Error	Error	795	872	0	0	825	1019	0	0	0	0
3	15	13	""	"iYGR263C"	14160	15590	110	420	824	811	93	108	90	61	55	0	528	1340	1446	94	121	184	53	51	0	0	0	0	0	0	0	0	0	0	0	0	0	0	0	0	0	0	0	0.753	0.587	0.566	0.687	3.409	0.517	0.821	0.000	0.000	0.000	0.000	0.000	0.000	0.000	0.000	0.000	0.000	0.000	0.000	0.000	0.000	80	449	761	1977	-0.408	Error	Error	327	434	0	0	731	1246	0	0	0	0
3	16	13	""	"iYGR281W"	14350	15600	120	3182	3117	2423	103	117	87	89	85	0	857	853	694	101	124	170	67	61	0	0	0	0	0	0	0	0	0	0	0	0	0	0	0	0	0	0	0	4.073	4.008	3.849	3.680	2.519	4.003	0.804	0.000	0.000	0.000	0.000	0.000	0.000	0.000	0.000	0.000	0.000	0.000	0.000	0.000	0.000	120	531	3835	3766	2.026	Error	Error	3079	756	0	0	3014	752	0	0	0	0
3	17	13	""	"iYGR285C"	14530	15610	110	234	303	241	107	118	58	61	52	0	397	582	562	104	125	102	61	56	0	0	0	0	0	0	0	0	0	0	0	0	0	0	0	0	0	0	0	0.433	0.410	0.441	0.539	2.714	0.366	0.656	0.000	0.000	0.000	0.000	0.000	0.000	0.000	0.000	0.000	0.000	0.000	0.000	0.000	0.000	80	452	420	674	-1.206	Error	Error	127	293	0	0	196	478	0	0	0	0
3	18	13	""	"iYGR288W-0"	14720	15600	120	1398	2139	2185	108	119	53	82	78	0	890	1906	2235	108	128	98	65	57	0	0	0	0	0	0	0	0	0	0	0	0	0	0	0	0	0	0	0	1.650	1.130	1.125	1.322	3.658	1.020	0.835	0.000	0.000	0.000	0.000	0.000	0.000	0.000	0.000	0.000	0.000	0.000	0.000	0.000	0.000	120	542	2072	3829	0.722	Error	Error	1290	782	0	0	2031	1798	0	0	0	0
3	19	13	""	"iYHL046C"	14930	15600	120	3674	3860	3047	109	306	2554	56	42	0	2400	2270	1908	109	179	536	61	58	0	0	0	0	0	0	0	0	0	0	0	0	0	0	0	0	0	0	0	1.556	1.736	1.757	1.898	2.986	1.719	0.843	0.000	0.000	0.000	0.000	0.000	0.000	0.000	0.000	0.000	0.000	0.000	0.000	0.000	0.000	120	549	5856	5912	0.638	Error	Error	3565	2291	0	0	3751	2161	0	0	0	0
3	20	13	""	"iYHL042W"	15120	15600	120	569	673	560	106	113	49	84	77	0	1806	1992	1909	106	116	64	81	80	0	0	0	0	0	0	0	0	0	0	0	0	0	0	0	0	0	0	0	0.272	0.301	0.318	0.367	2.990	0.273	0.822	0.000	0.000	0.000	0.000	0.000	0.000	0.000	0.000	0.000	0.000	0.000	0.000	0.000	0.000	120	473	2163	2453	-1.876	Error	Error	463	1700	0	0	567	1886	0	0	0	0
3	21	13	""	"iYHL038C"	15280	15610	110	1504	2076	1964	106	140	210	67	62	0	1770	2366	2403	107	181	443	57	52	0	0	0	0	0	0	0	0	0	0	0	0	0	0	0	0	0	0	0	0.841	0.872	0.906	1.159	3.262	0.815	0.834	0.000	0.000	0.000	0.000	0.000	0.000	0.000	0.000	0.000	0.000	0.000	0.000	0.000	0.000	80	468	3061	4229	-0.250	Error	Error	1398	1663	0	0	1970	2259	0	0	0	0
3	22	13	""	"itH(GUG)H"	15500	15600	120	661	838	724	102	143	246	60	51	0	317	447	395	103	208	632	25	0	0	0	0	0	0	0	0	0	0	0	0	0	0	0	0	0	0	0	0	2.612	2.140	1.850	1.612	2.565	2.040	0.805	0.000	0.000	0.000	0.000	0.000	0.000	0.000	0.000	0.000	0.000	0.000	0.000	0.000	0.000	120	655	773	1080	1.385	Error	Error	559	214	0	0	736	344	0	0	0	0
3	1	14	""	"iYHL019C"	11490	15790	110	356	684	629	92	99	49	67	58	0	705	1353	1325	98	112	79	58	55	0	0	0	0	0	0	0	0	0	0	0	0	0	0	0	0	0	0	0	0.435	0.472	0.530	0.605	2.825	0.436	0.835	0.000	0.000	0.000	0.000	0.000	0.000	0.000	0.000	0.000	0.000	0.000	0.000	0.000	0.000	80	554	871	1847	-1.201	Error	Error	264	607	0	0	592	1255	0	0	0	0
3	2	14	""	"iYHL015W"	11670	15790	110	582	595	402	103	122	92	73	70	0	424	423	308	105	134	117	66	57	0	0	0	0	0	0	0	0	0	0	0	0	0	0	0	0	0	0	0	1.502	1.547	1.330	1.250	2.091	1.476	0.742	0.000	0.000	0.000	0.000	0.000	0.000	0.000	0.000	0.000	0.000	0.000	0.000	0.000	0.000	80	532	798	810	0.586	Error	Error	479	319	0	0	492	318	0	0	0	0
3	3	14	""	"iYIL118W"	11910	15800	110	992	947	715	100	124	160	70	63	0	658	655	528	104	118	97	62	60	0	0	0	0	0	0	0	0	0	0	0	0	0	0	0	0	0	0	0	1.610	1.537	1.434	1.490	2.644	1.458	0.833	0.000	0.000	0.000	0.000	0.000	0.000	0.000	0.000	0.000	0.000	0.000	0.000	0.000	0.000	80	500	1446	1398	0.687	Error	Error	892	554	0	0	847	551	0	0	0	0
3	4	14	""	"iYIL114C"	12080	15790	120	286	366	258	96	103	45	80	70	0	699	898	839	104	110	42	73	70	0	0	0	0	0	0	0	0	0	0	0	0	0	0	0	0	0	0	0	0.319	0.340	0.359	0.390	2.550	0.296	0.816	0.000	0.000	0.000	0.000	0.000	0.000	0.000	0.000	0.000	0.000	0.000	0.000	0.000	0.000	120	522	785	1064	-1.647	Error	Error	190	595	0	0	270	794	0	0	0	0
3	5	14	""	"iYIL110W"	12260	15790	120	1893	1920	1524	96	108	88	83	77	0	520	643	534	102	115	97	65	59	0	0	0	0	0	0	0	0	0	0	0	0	0	0	0	0	0	0	0	4.299	3.372	3.168	2.836	3.384	3.220	0.864	0.000	0.000	0.000	0.000	0.000	0.000	0.000	0.000	0.000	0.000	0.000	0.000	0.000	0.000	120	530	2215	2365	2.104	Error	Error	1797	418	0	0	1824	541	0	0	0	0
3	6	14	""	"iYIL096C"	12430	15790	110	639	833	768	96	133	206	52	52	0	332	727	734	101	149	223	50	46	0	0	0	0	0	0	0	0	0	0	0	0	0	0	0	0	0	0	0	2.351	1.177	1.006	1.198	2.708	1.081	0.816	0.000	0.000	0.000	0.000	0.000	0.000	0.000	0.000	0.000	0.000	0.000	0.000	0.000	0.000	80	484	774	1363	1.233	Error	Error	543	231	0	0	737	626	0	0	0	0
3	7	14	""	"iYIL093C"	12640	15790	110	1070	1160	900	92	126	187	70	66	0	2536	2334	2014	105	158	258	63	63	0	0	0	0	0	0	0	0	0	0	0	0	0	0	0	0	0	0	0	0.402	0.479	0.486	0.634	2.754	0.417	0.841	0.000	0.000	0.000	0.000	0.000	0.000	0.000	0.000	0.000	0.000	0.000	0.000	0.000	0.000	80	530	3409	3297	-1.314	Error	Error	978	2431	0	0	1068	2229	0	0	0	0
3	8	14	""	"iYIL089W"	12830	15790	110	1933	2266	1884	93	115	144	76	73	0	1326	1392	1208	99	145	245	65	60	0	0	0	0	0	0	0	0	0	0	0	0	0	0	0	0	0	0	0	1.500	1.681	1.581	1.690	2.461	1.644	0.852	0.000	0.000	0.000	0.000	0.000	0.000	0.000	0.000	0.000	0.000	0.000	0.000	0.000	0.000	80	496	3067	3466	0.585	Error	Error	1840	1227	0	0	2173	1293	0	0	0	0
3	9	14	""	"iYIL072W"	13020	15790	110	3933	3475	2611	91	131	207	83	73	0	2112	2187	1800	97	149	267	67	65	0	0	0	0	0	0	0	0	0	0	0	0	0	0	0	0	0	0	0	1.907	1.619	1.567	1.668	2.496	1.511	0.887	0.000	0.000	0.000	0.000	0.000	0.000	0.000	0.000	0.000	0.000	0.000	0.000	0.000	0.000	80	548	5857	5474	0.931	Error	Error	3842	2015	0	0	3384	2090	0	0	0	0
3	10	14	""	"iYIL068C"	13230	15790	100	670	737	570	92	110	108	71	63	0	1223	1271	1102	97	122	167	68	58	0	0	0	0	0	0	0	0	0	0	0	0	0	0	0	0	0	0	0	0.513	0.549	0.573	0.600	2.703	0.512	0.841	0.000	0.000	0.000	0.000	0.000	0.000	0.000	0.000	0.000	0.000	0.000	0.000	0.000	0.000	80	459	1704	1819	-0.962	Error	Error	578	1126	0	0	645	1174	0	0	0	0
3	11	14	""	"iYIL063C"	13400	15790	110	554	491	308	90	99	94	71	65	0	1306	1063	797	99	113	142	68	65	0	0	0	0	0	0	0	0	0	0	0	0	0	0	0	0	0	0	0	0.384	0.416	0.453	0.544	2.402	0.366	0.849	0.000	0.000	0.000	0.000	0.000	0.000	0.000	0.000	0.000	0.000	0.000	0.000	0.000	0.000	80	490	1671	1365	-1.379	Error	Error	464	1207	0	0	401	964	0	0	0	0
3	12	14	""	"iYIL046W"	13590	15790	110	1596	1874	1722	96	140	277	67	61	0	1517	1901	1904	102	177	458	57	55	0	0	0	0	0	0	0	0	0	0	0	0	0	0	0	0	0	0	0	1.060	0.988	0.991	1.184	2.758	0.907	0.875	0.000	0.000	0.000	0.000	0.000	0.000	0.000	0.000	0.000	0.000	0.000	0.000	0.000	0.000	80	501	2915	3577	0.084	Error	Error	1500	1415	0	0	1778	1799	0	0	0	0
3	13	14	""	"iYIL042C"	13770	15800	110	918	857	686	98	155	301	57	56	0	868	1723	1667	103	238	611	51	47	0	0	0	0	0	0	0	0	0	0	0	0	0	0	0	0	0	0	0	1.072	0.469	0.472	0.685	3.777	0.418	0.830	0.000	0.000	0.000	0.000	0.000	0.000	0.000	0.000	0.000	0.000	0.000	0.000	0.000	0.000	80	472	1585	2379	0.100	Error	Error	820	765	0	0	759	1620	0	0	0	0
3	14	14	""	"iYIL038C"	13950	15790	110	365	473	412	92	112	114	62	53	0	748	1242	1239	97	183	443	55	48	0	0	0	0	0	0	0	0	0	0	0	0	0	0	0	0	0	0	0	0.419	0.333	0.332	0.415	3.025	0.276	0.790	0.000	0.000	0.000	0.000	0.000	0.000	0.000	0.000	0.000	0.000	0.000	0.000	0.000	0.000	80	514	924	1526	-1.254	Error	Error	273	651	0	0	381	1145	0	0	0	0
3	15	14	""	"iYJL014W"	14180	15790	120	10107	9082	6474	99	115	89	96	95	0	1485	1240	919	98	138	254	68	62	0	0	0	0	0	0	0	0	0	0	0	0	0	0	0	0	0	0	0	7.216	7.866	7.765	9.053	2.092	7.860	0.896	0.000	0.000	0.000	0.000	0.000	0.000	0.000	0.000	0.000	0.000	0.000	0.000	0.000	0.000	120	578	11395	10125	2.851	Error	Error	10008	1387	0	0	8983	1142	0	0	0	0
3	16	14	""	"itK(CUU)J"	14360	15790	120	3168	2702	1573	99	110	48	92	91	0	1354	1138	691	102	111	43	83	81	0	0	0	0	0	0	0	0	0	0	0	0	0	0	0	0	0	0	0	2.451	2.513	2.506	2.482	2.013	2.480	0.898	0.000	0.000	0.000	0.000	0.000	0.000	0.000	0.000	0.000	0.000	0.000	0.000	0.000	0.000	120	497	4321	3639	1.294	Error	Error	3069	1252	0	0	2603	1036	0	0	0	0
3	17	14	""	"iYJL010C"	14560	15790	120	900	772	449	101	111	50	85	83	0	1011	844	503	108	124	76	80	74	0	0	0	0	0	0	0	0	0	0	0	0	0	0	0	0	0	0	0	0.885	0.912	0.910	0.905	1.934	0.879	0.862	0.000	0.000	0.000	0.000	0.000	0.000	0.000	0.000	0.000	0.000	0.000	0.000	0.000	0.000	120	474	1702	1407	-0.177	Error	Error	799	903	0	0	671	736	0	0	0	0
3	18	14	""	"iYJR005W"	14730	15790	120	4552	4325	3726	112	118	48	91	89	0	2438	2536	2457	108	120	50	76	73	0	0	0	0	0	0	0	0	0	0	0	0	0	0	0	0	0	0	0	1.906	1.735	1.736	2.198	2.521	1.617	0.870	0.000	0.000	0.000	0.000	0.000	0.000	0.000	0.000	0.000	0.000	0.000	0.000	0.000	0.000	120	453	6770	6641	0.930	Error	Error	4440	2330	0	0	4213	2428	0	0	0	0
3	19	14	""	"iYJR009C-0"	14920	15790	120	854	865	553	107	115	52	85	80	0	1322	1164	839	108	120	67	81	75	0	0	0	0	0	0	0	0	0	0	0	0	0	0	0	0	0	0	0	0.615	0.718	0.741	0.758	2.179	0.655	0.875	0.000	0.000	0.000	0.000	0.000	0.000	0.000	0.000	0.000	0.000	0.000	0.000	0.000	0.000	120	506	1961	1814	-0.701	Error	Error	747	1214	0	0	758	1056	0	0	0	0
3	20	14	""	"iYJR011C"	15120	15790	120	3317	3006	1323	95	100	45	100	100	0	2158	1873	893	104	115	73	95	90	0	0	0	0	0	0	0	0	0	0	0	0	0	0	0	0	0	0	0	1.569	1.646	1.673	1.829	1.787	1.605	0.908	0.000	0.000	0.000	0.000	0.000	0.000	0.000	0.000	0.000	0.000	0.000	0.000	0.000	0.000	120	502	5276	4680	0.650	Error	Error	3222	2054	0	0	2911	1769	0	0	0	0
3	21	14	""	"iYJR035W"	15290	15790	110	1363	1448	1190	103	144	231	67	63	0	582	625	522	107	138	150	62	53	0	0	0	0	0	0	0	0	0	0	0	0	0	0	0	0	0	0	0	2.653	2.597	2.200	2.007	2.694	2.494	0.842	0.000	0.000	0.000	0.000	0.000	0.000	0.000	0.000	0.000	0.000	0.000	0.000	0.000	0.000	80	442	1735	1863	1.407	Error	Error	1260	475	0	0	1345	518	0	0	0	0
3	22	14	""	"iYJR041C"	15480	15790	120	645	711	531	107	145	204	63	56	0	1191	1373	1234	107	138	140	62	61	0	0	0	0	0	0	0	0	0	0	0	0	0	0	0	0	0	0	0	0.496	0.477	0.464	0.669	3.337	0.438	0.754	0.000	0.000	0.000	0.000	0.000	0.000	0.000	0.000	0.000	0.000	0.000	0.000	0.000	0.000	120	607	1622	1870	-1.011	Error	Error	538	1084	0	0	604	1266	0	0	0	0
3	1	15	""	"iYJRWdelta14"	11490	15980	110	1767	1537	834	89	104	92	98	97	0	2482	2143	1166	98	124	170	95	91	0	0	0	0	0	0	0	0	0	0	0	0	0	0	0	0	0	0	0	0.704	0.708	0.696	0.719	1.647	0.695	0.902	0.000	0.000	0.000	0.000	0.000	0.000	0.000	0.000	0.000	0.000	0.000	0.000	0.000	0.000	80	511	4062	3493	-0.507	Error	Error	1678	2384	0	0	1448	2045	0	0	0	0
3	2	15	""	"itR(CCU)J"	11660	15980	110	955	826	541	99	130	159	72	67	0	514	438	304	99	134	184	61	53	0	0	0	0	0	0	0	0	0	0	0	0	0	0	0	0	0	0	0	2.063	2.145	1.938	1.865	2.461	1.997	0.750	0.000	0.000	0.000	0.000	0.000	0.000	0.000	0.000	0.000	0.000	0.000	0.000	0.000	0.000	80	500	1271	1066	1.044	Error	Error	856	415	0	0	727	339	0	0	0	0
3	3	15	""	"iYJR056C"	11870	15990	120	1547	1361	785	96	117	128	87	79	0	2713	2243	1471	103	119	81	88	83	0	0	0	0	0	0	0	0	0	0	0	0	0	0	0	0	0	0	0	0.556	0.591	0.595	0.659	1.923	0.549	0.892	0.000	0.000	0.000	0.000	0.000	0.000	0.000	0.000	0.000	0.000	0.000	0.000	0.000	0.000	120	557	4061	3405	-0.847	Error	Error	1451	2610	0	0	1265	2140	0	0	0	0
3	4	15	""	"iYJR059W"	12050	15980	110	1658	1468	690	91	107	90	100	96	0	3415	2985	1402	102	140	290	92	90	0	0	0	0	0	0	0	0	0	0	0	0	0	0	0	0	0	0	0	0.473	0.478	0.477	0.506	1.633	0.445	0.882	0.000	0.000	0.000	0.000	0.000	0.000	0.000	0.000	0.000	0.000	0.000	0.000	0.000	0.000	80	492	4880	4260	-1.080	Error	Error	1567	3313	0	0	1377	2883	0	0	0	0
3	5	15	""	"iYKL044W"	12270	15990	100	507	522	363	94	111	104	67	63	0	794	822	701	103	130	186	57	56	0	0	0	0	0	0	0	0	0	0	0	0	0	0	0	0	0	0	0	0.598	0.595	0.596	0.707	2.905	0.507	0.789	0.000	0.000	0.000	0.000	0.000	0.000	0.000	0.000	0.000	0.000	0.000	0.000	0.000	0.000	80	422	1104	1147	-0.743	Error	Error	413	691	0	0	428	719	0	0	0	0
3	6	15	""	"iYKL040C"	12420	15980	110	817	1023	924	98	124	156	63	57	0	1339	2402	2492	100	191	520	58	51	0	0	0	0	0	0	0	0	0	0	0	0	0	0	0	0	0	0	0	0.580	0.402	0.438	0.518	2.738	0.358	0.794	0.000	0.000	0.000	0.000	0.000	0.000	0.000	0.000	0.000	0.000	0.000	0.000	0.000	0.000	80	450	1958	3227	-0.785	Error	Error	719	1239	0	0	925	2302	0	0	0	0
3	7	15	""	"iYKL035W"	12610	15980	110	1865	1755	1493	95	144	224	63	61	0	2134	2398	2188	102	246	653	61	55	0	0	0	0	0	0	0	0	0	0	0	0	0	0	0	0	0	0	0	0.871	0.723	0.700	0.750	2.350	0.648	0.841	0.000	0.000	0.000	0.000	0.000	0.000	0.000	0.000	0.000	0.000	0.000	0.000	0.000	0.000	80	504	3802	3956	-0.199	Error	Error	1770	2032	0	0	1660	2296	0	0	0	0
[truncated: 4,298,019 more chars]
